# Supplementary material
Source: Research Square preprint supplement (doi:10.21203/rs.3.rs-9951586/v1)
Supplement: Supplementary file 2 [file d996c7a8e44f0cf4abf2fc6d.xlsx]

## Sheet: Figure 1
Benchmarks	Prediction type	Dataset	Total Molecules	No-scaffold Molecules	No-scaffold Proportion
MoleculeNet	Regression	FreeSolv	642	320	0.4984
MoleculeNet	Regression	QM7	6832	3035	0.4442
MoleculeNet	Regression	ESOL	1117	316	0.2829
MoleculeNet	Classification	ToxCast	8577	1956	0.2281
MoleculeNet	Classification	Tox21	7831	1781	0.2274
MoleculeNet	Regression	QM8	21766	3643	0.1674
MoleculeNet	Classification	SIDER	1427	154	0.1079
MoleculeNet	Regression	QM9	133798	13998	0.1046
MoleculeNet	Classification	ClinTox	1459	129	0.0884
MoleculeNet	Regression	PDBbind (core)	174	10	0.0575
MoleculeNet	Classification	BBBP	1975	95	0.0481
MoleculeNet	Classification	HIV	41127	1582	0.0385
MoleculeNet	Classification	PCBA	437929	2124	0.0049
MoleculeNet	Classification	BACE	1513	5	0.0033
MoleculeNet	Regression	Lipophilicity	4200	5	0.0012
MoleculeNet	Classification	MUV	93087	106	0.0011
ADMET	Regression	Hydration energy	640	318	0.4969
ADMET	Regression	Boiling point	5402	2652	0.4909
ADMET	Regression	logVP (vapor pressure)	2692	1226	0.4554
ADMET	Regression	Tetraphymena pyriformis	1745	751	0.4304
ADMET	Regression	Skin permeability	186	74	0.3978
ADMET	Classification	Genetic tox (micronucleus)	641	233	0.3635
ADMET	Classification	Biodegradation	1660	589	0.3548
ADMET	Regression	Marine tox (Fathead minnow)	867	295	0.3403
ADMET	Regression	Marine tox (Daphnia magna)	346	102	0.2948
ADMET	Classification	Marine tox (crustacean)	666	192	0.2883
ADMET	Classification	Skin sensitivity	541	145	0.268
ADMET	Classification	NR-TR	5366	1383	0.2577
ADMET	Classification	NR-Aromatase	6027	1538	0.2552
ADMET	Regression	logS (water solubility)	9964	2538	0.2547
ADMET	Classification	SR-ARE	5727	1446	0.2525
ADMET	Regression	Melting point	8548	2125	0.2486
ADMET	Classification	SR-MMP	6416	1588	0.2475
ADMET	Classification	NR-ER	6661	1637	0.2458
ADMET	Classification	NR-PPAR-gamma	6714	1650	0.2458
ADMET	Classification	NR-AhR	7183	1733	0.2413
ADMET	Classification	SR-HSE	6395	1540	0.2408
ADMET	Classification	Eye corrosion	2298	553	0.2406
ADMET	Classification	SR-P53	7466	1768	0.2368
ADMET	Classification	NR-AR-LBD	6998	1648	0.2355
ADMET	Classification	NR-GR	6048	1424	0.2354
ADMET	Classification	SR-ATAD5	7307	1692	0.2316
ADMET	Classification	NR-ER-LBD	7218	1659	0.2298
ADMET	Classification	NR-AR	7842	1778	0.2267
ADMET	Regression	Rat oral acute	10130	2283	0.2254
ADMET	Classification	Carcinogenicity	1632	349	0.2138
ADMET	Classification	Bee tox	182	36	0.1978
ADMET	Classification	Eye irritation	5209	986	0.1893
ADMET	Classification	Avian	579	100	0.1727
ADMET	Regression	Bioconcentration factor	676	115	0.1701
ADMET	Classification	Ames	7653	1294	0.1691
ADMET	Classification	Respiratory tox	3849	639	0.166
ADMET	Regression	pKb	3662	591	0.1614
ADMET	Regression	pKa	3195	506	0.1584
ADMET	Regression	BBB (CNS)	153	23	0.1503
ADMET	Regression	Rat oral chronic	380	56	0.1474
ADMET	Regression	logP (octanol-water partition coefficient)	14895	1242	0.0834
ADMET	Classification	Drug metabolism (cyp1a2 substrate)	366	30	0.082
ADMET	Classification	Liver tox	2905	236	0.0812
ADMET	Regression	Maximum recommended daily dose	1200	87	0.0725
ADMET	Classification	Drug metabolism (cyp2c19 substrate)	261	18	0.069
ADMET	Classification	Renal excretion (OCT2 - Organic Cation Transporter 2)	894	60	0.0671
ADMET	Classification	Liver Tox	1213	75	0.0618
ADMET	Classification	Drug metabolism (cyp3a4 substrate)	1551	87	0.0561
ADMET	Classification	Hepatic uptake rate (OATP1B3)	1247	61	0.0489
ADMET	Classification	Intestinal absorption	1438	64	0.0445
ADMET	Classification	Hepatic uptake rate (OATP1B1)	1337	58	0.0434
ADMET	Classification	Oral bioavailability 20%	1005	42	0.0418
ADMET	Classification	Oral bioavailability 50%	994	41	0.0412
ADMET	Classification	Half-life of a drug	753	31	0.0412
ADMET	Classification	Drug metabolism (cyp3a4 inhibitor)	23040	919	0.0399
ADMET	Classification	Drug metabolism (cyp2c9 substrate)	1034	40	0.0387
ADMET	Classification	Drug metabolism (cyp2d6 substrate)	917	35	0.0382
ADMET	Classification	BBB (logBB)	3203	120	0.0375
ADMET	Regression	Volume distribution	1083	37	0.0342
ADMET	Classification	Drug metabolism (cyp2d6 inhibitor)	19700	527	0.0268
ADMET	Classification	Drug metabolism (cyp2c9 inhibitor)	19283	509	0.0264
ADMET	Classification	Drug metabolism (cyp2c19 inhibitor)	19652	509	0.0259
ADMET	Classification	Drug metabolism (cyp1a2 inhibitor)	19891	498	0.025
ADMET	Classification	Drug efflux pump substrate (pgp_substrate)	1242	28	0.0225
ADMET	Regression	Clearance	835	15	0.018
ADMET	Classification	Drug efflux pump inhibitor (pgp_inhibitor)	2244	36	0.016
ADMET	Regression	Plasma protein binding	3611	54	0.015
ADMET	Regression	Caco 2 (Intestinal permeability)	2473	20	0.0081
ADMET	Regression	Fraction unbound in human plasma	2377	18	0.0076
ADMET	Classification	Heart rhythm disorder	20728	94	0.0045
ADMET	Regression	Intestinal permeability (MDCK - Madin-Darby canine kidney)	1136	5	0.0044
ADMET	Regression	logD (octanol-water distribution coefficient)	10629	32	0.003
ADMET	Classification	Breast cancer resistance protein inhibitor	694	0	0

## Sheet: Figure 2
Benchmark_display	TaskGroup_display	Dataset_display	Benchmark	TaskGroup	Dataset	Total_Molecules	No_Scaffold_Molecules	Has_Scaffold_Molecules	No_Scaffold_Proportion	No_Group_N	Has_Group_N	No_PairwiseMean	HasMixed_PairwiseMean	TrueScaffoldClass_PairwiseMean	No_CohesionGini	HasMixed_CohesionGini	TrueScaffoldClass_CohesionGini	SameScaffold_NNMean	CrossScaffold_NNMean	NoToScaffold_NNMean	NoToNo_NNMean	ScaffoldClassCount_ge2
ADMET	Classification	ames	admet	classification	ames	7653	1294	6359	0.169084	1294	6359	0.0950686	0.100522	0.358357	0.177582	0.134498	0.0801239	0.668446	0.557911	0.301885	0.640287	621
ADMET	Classification	avian_tox	admet	classification	avian_tox	579	100	479	0.172712	100	479	0.103658	0.105936	0.307016	0.177512	0.14211	0.0839141	0.507313	0.369509	0.260691	0.474765	53
ADMET	Classification	bee_tox	admet	classification	bee_tox	182	36	146	0.197802	36	146	0.126004	0.110112	0.310161	0.145627	0.131657	0.0824776	0.478227	0.346647	0.231635	0.384336	18
ADMET	Classification	Biodegradation	admet	classification	biodegradation	1660	589	1071	0.354819	589	1071	0.12602	0.108237	0.21804	0.237622	0.173245	0.0896056	0.55052	0.45314	0.294177	0.6363	68
ADMET	Classification	carcinogenicity	admet	classification	carcinogenicity	1632	349	1283	0.213848	349	1283	0.0905696	0.0892238	0.341328	0.188548	0.130366	0.0776561	0.572922	0.465449	0.238491	0.554976	148
ADMET	Classification	crustacean	admet	classification	crustacean	666	192	474	0.288288	192	474	0.101175	0.095134	0.238936	0.206504	0.164394	0.0761847	0.472127	0.36898	0.24019	0.50503	38
ADMET	Classification	CYP1A2 substrate	admet	classification	cyp1a2_substrate	366	30	336	0.0819672	30	336	0.133865	0.102459	0.332788	0.176758	0.0938738	0.0636288	0.432633	0.316222	0.230341	0.285488	28
ADMET	Classification	Eye corrosion	admet	classification	eye_corrosion	2298	553	1745	0.240644	553	1745	0.110539	0.096467	0.333203	0.17268	0.116953	0.070076	0.556975	0.445722	0.265458	0.599234	191
ADMET	Classification	Eye irritation	admet	classification	eye_irritation	5209	986	4223	0.189288	986	4223	0.104711	0.104165	0.248579	0.197104	0.143797	0.086295	0.571905	0.476129	0.297507	0.622933	292
ADMET	Classification	h_ht	admet	classification	h_ht	2905	236	2669	0.0812392	236	2669	0.10169	0.0968791	0.455514	0.210476	0.0990075	0.0598328	0.636719	0.556817	0.260803	0.519338	340
ADMET	Classification	Genetic tox (micronucleus)	admet	classification	micronucleus_tox	641	233	408	0.363495	233	408	0.115241	0.0863709	0.256991	0.208488	0.166393	0.0882181	0.454616	0.40432	0.252739	0.53116	44
ADMET	Classification	nr_ahr	admet	classification	nr_ahr	7183	1733	5450	0.241264	1733	5450	0.109666	0.0951829	0.310344	0.209881	0.137959	0.0837193	0.600024	0.503265	0.323294	0.653065	508
ADMET	Classification	nr_ar	admet	classification	nr_ar	7842	1778	6064	0.226728	1778	6064	0.10953	0.0957074	0.312528	0.210119	0.134591	0.0831006	0.605788	0.508697	0.324796	0.656109	557
ADMET	Classification	nr_ar_lbd	admet	classification	nr_ar_lbd	6998	1648	5350	0.235496	1648	5350	0.110871	0.0964532	0.308765	0.207671	0.136516	0.0827086	0.596754	0.499166	0.323562	0.64737	502
ADMET	Classification	nr_aromatase	admet	classification	nr_aromatase	6027	1538	4489	0.255185	1538	4489	0.111949	0.096219	0.301467	0.206399	0.139775	0.0838279	0.586978	0.485166	0.318237	0.644527	419
ADMET	Classification	nr_er	admet	classification	nr_er	6661	1637	5024	0.245759	1637	5024	0.10965	0.0962437	0.305539	0.211717	0.138507	0.0816961	0.592843	0.498196	0.318363	0.647877	480
ADMET	Classification	nr_er_lbd	admet	classification	nr_er_lbd	7218	1659	5559	0.229842	1659	5559	0.110258	0.096462	0.308435	0.208887	0.136042	0.0829858	0.5965	0.498337	0.324085	0.648809	517
ADMET	Classification	nr_gr	admet	classification	nr_gr	6046	1423	4623	0.235362	1423	4623	0.11695	0.0979911	0.291209	0.194676	0.136989	0.0814866	0.569785	0.47524	0.325825	0.645252	426
ADMET	Classification	nr_ppar_gamma	admet	classification	nr_ppar_gamma	6714	1650	5064	0.245755	1650	5064	0.110544	0.0965662	0.302673	0.208821	0.139702	0.0839551	0.591594	0.492843	0.322206	0.648161	466
ADMET	Classification	nr_tr	admet	classification	nr_tr	5364	1382	3982	0.257644	1382	3982	0.118938	0.0978425	0.284471	0.194238	0.143032	0.0838355	0.567003	0.470246	0.324205	0.646334	354
ADMET	Classification	respiratory_tox	admet	classification	respiratory_tox	3849	639	3210	0.166017	639	3210	0.108087	0.0975182	0.398382	0.191201	0.115197	0.0640325	0.595076	0.478238	0.289654	0.58584	378
ADMET	Classification	skin_sens	admet	classification	skin_sens	541	145	396	0.268022	145	396	0.144581	0.105071	0.25096	0.221626	0.143937	0.0691213	0.489705	0.358943	0.248726	0.608764	37
ADMET	Classification	sr_are	admet	classification	sr_are	5727	1446	4281	0.252488	1446	4281	0.111478	0.0997244	0.276509	0.208384	0.141866	0.0844709	0.57325	0.477519	0.318884	0.638475	371
ADMET	Classification	sr_atad5	admet	classification	sr_atad5	7307	1692	5615	0.231559	1692	5615	0.111117	0.0966423	0.308661	0.207866	0.136104	0.0830147	0.596515	0.498512	0.323543	0.652718	520
ADMET	Classification	sr_hse	admet	classification	sr_hse	6395	1540	4855	0.240813	1540	4855	0.109388	0.098872	0.281605	0.211591	0.138036	0.083588	0.5777	0.482663	0.318335	0.64222	425
ADMET	Classification	sr_mmp	admet	classification	sr_mmp	6416	1588	4828	0.247506	1588	4828	0.11155	0.0955801	0.304606	0.208556	0.140154	0.084222	0.595778	0.494646	0.323042	0.649561	432
ADMET	Classification	sr_p53	admet	classification	sr_p53	7466	1768	5698	0.236807	1768	5698	0.109329	0.0964715	0.309913	0.208837	0.136789	0.0832194	0.602572	0.505044	0.322626	0.654513	528
ADMET	Regression	BBB (CNS)	admet	regression	bbb_cns	153	23	130	0.150327	23	130	0.171065	0.100983	0.436542	0.133072	0.0976663	0.0516488	0.533498	0.303246	0.239113	0.446754	18
ADMET	Regression	bioconcf	admet	regression	bioconcf	676	115	561	0.170118	115	561	0.0857448	0.114352	0.219827	0.2108	0.167056	0.0911648	0.5259	0.429421	0.23411	0.49778	35
ADMET	Regression	Boiling point	admet	regression	bp	5402	2652	2750	0.490929	2652	2750	0.106236	0.105533	0.206437	0.20135	0.186226	0.0954563	0.567962	0.517974	0.296248	0.655688	127
ADMET	Regression	Marine tox (Fathead minnow)	admet	regression	fm_reg	867	295	572	0.340254	295	572	0.110583	0.108316	0.199598	0.220294	0.166691	0.0864169	0.51727	0.409441	0.258577	0.584439	41
ADMET	Regression	Hydration energy	admet	regression	hydratione	640	318	322	0.496875	318	322	0.1182	0.113074	0.228777	0.224041	0.201166	0.0964081	0.498123	0.41851	0.228379	0.597666	26
ADMET	Regression	Marine tox (Daphnia magna)	admet	regression	lc50dm	346	102	244	0.294798	102	244	0.0812189	0.117652	0.236212	0.200346	0.163997	0.0946178	0.532411	0.37889	0.204445	0.428776	17
ADMET	Regression	logP	admet	regression	logp	14848	1223	13625	0.082368	1223	13625	0.106879	0.103459	0.34282	0.187888	0.126927	0.0794336	0.680929	0.5584	0.353191	0.644016	949
ADMET	Regression	logS	admet	regression	logs	9961	2537	7424	0.254693	2537	7424	0.110035	0.0973579	0.309209	0.216226	0.140121	0.0871778	0.632196	0.531354	0.323462	0.659154	602
ADMET	Regression	logVP	admet	regression	logvp	2692	1226	1466	0.455423	1226	1466	0.10963	0.101454	0.241439	0.235158	0.177626	0.0944343	0.561901	0.47572	0.267252	0.638947	109
ADMET	Regression	Melting point	admet	regression	mp	8548	2125	6423	0.248596	2125	6423	0.110979	0.102071	0.249802	0.254397	0.155557	0.0898571	0.590982	0.516958	0.318283	0.671087	431
ADMET	Regression	pka	admet	regression	pka	3195	506	2689	0.158372	506	2689	0.143369	0.115976	0.302172	0.155336	0.135436	0.0760011	0.583957	0.477939	0.312339	0.571626	231
ADMET	Regression	pkb	admet	regression	pkb	3662	591	3071	0.161387	591	3071	0.123182	0.100628	0.307055	0.133653	0.131369	0.0704476	0.591165	0.495518	0.313544	0.645751	275
ADMET	Regression	Tetraphymena pyriformis	admet	regression	pyriformis_reg	1745	751	994	0.430372	751	994	0.146457	0.137872	0.197457	0.156869	0.108283	0.0789637	0.607303	0.423974	0.302198	0.768301	31
ADMET	Regression	rat_acute_reg	admet	regression	rat_acute_reg	10130	2283	7847	0.22537	2283	7847	0.106557	0.0979438	0.31506	0.177764	0.13319	0.080228	0.618244	0.495123	0.3435	0.624471	665
ADMET	Regression	rat_chronic	admet	regression	rat_chronic	380	56	324	0.147368	56	324	0.0763538	0.105681	0.294451	0.196319	0.147314	0.0810562	0.511212	0.360037	0.222586	0.363173	31
ADMET	Regression	Skin permeability	admet	regression	skin_permeability	186	74	112	0.397849	74	112	0.145571	0.120447	0.338708	0.230976	0.139616	0.0895996	0.553159	0.395262	0.204595	0.534693	10
MoleculeNet	Classification	clintox	moleculenet	classification	clintox	1459	129	1330	0.0884167	129	1330	0.0827777	0.096343	0.437675	0.270722	0.0968662	0.0586291	0.599091	0.46217	0.233807	0.442115	169
MoleculeNet	Classification	sider	moleculenet	classification	sider	1427	154	1273	0.107919	154	1273	0.0596697	0.0984379	0.415385	0.374428	0.0957523	0.060427	0.572653	0.47213	0.199769	0.408073	129
MoleculeNet	Classification	tox21	moleculenet	classification	tox21	7823	1775	6048	0.226895	1775	6048	0.1065	0.0969855	0.302914	0.222275	0.133942	0.0829825	0.596191	0.496281	0.320643	0.64802	532
MoleculeNet	Classification	toxcast	moleculenet	classification	toxcast	8577	1956	6621	0.228052	1956	6621	0.103737	0.0960732	0.318734	0.217877	0.134415	0.0819734	0.618219	0.498414	0.320976	0.660293	607
MoleculeNet	Regression	esol	moleculenet	regression	esol	1117	316	801	0.282901	316	801	0.127589	0.101579	0.281692	0.236557	0.152117	0.0807103	0.557042	0.460693	0.251039	0.604824	71
MoleculeNet	Regression	freesolv	moleculenet	regression	freesolv	642	320	322	0.498442	320	322	0.117533	0.113002	0.228777	0.225483	0.201482	0.0964081	0.498123	0.418458	0.228375	0.596031	26
MoleculeNet	Regression	qm7	moleculenet	regression	qm7	6832	3035	3797	0.444233	3035	3797	0.104241	0.080216	0.189486	0.0982563	0.122535	0.0790594	0.493316	0.468605	0.281747	0.571827	183
MoleculeNet	Regression	qm8	moleculenet	regression	qm8	21766	3643	18123	0.167371	3643	18123	0.124954	0.0801923	0.206974	0.1002	0.122007	0.0663658	0.534324	0.523133	0.344977	0.622652	680
MoleculeNet	Regression	qm9	moleculenet	regression	qm9	133798	13998	119800	0.10462	13998	119800	0.128849	0.0833739	0.209063	0.0928158	0.11744	0.0643153	0.580612	0.529125	0.378733	0.66135	3437
Benchmark_display	TaskGroup_display	Dataset_display	Target_display	Benchmark	TaskGroup	Dataset	Target	Total_Molecules	No_Scaffold_Molecules	Has_Scaffold_Molecules	No_Scaffold_Proportion	N_NoScaffold	N_HasScaffold	No_PositiveRate	Has_PositiveRate	PositiveRate_Diff_NoMinusHas	Abs_PositiveRate_Diff	Bernoulli_JSD	Metric_1_Name	Metric_1_Value	Metric_2_Name	Metric_2_Value	No_Mean	Has_Mean	No_SD	Has_SD	Mean_Diff_NoMinusHas	Abs_StandardizedMeanDiff	KS_Statistic
ADMET	Classification	ames	ames	admet	classification	ames	ames	7653	1294	6359	0.169084	1294	6359	0.444359	0.585312	-0.140954	0.140954	0.00997605	Abs_PositiveRate_Diff	0.140954	Bernoulli_JSD	0.00997605
ADMET	Classification	avian_tox	avian_tox	admet	classification	avian_tox	avian_tox	579	100	479	0.172712	100	479	0.22	0.141962	0.0780376	0.0780376	0.00516915	Abs_PositiveRate_Diff	0.0780376	Bernoulli_JSD	0.00516915
ADMET	Classification	bee_tox	bee_tox	admet	classification	bee_tox	bee_tox	182	36	146	0.197802	36	146	0.722222	0.465753	0.256469	0.256469	0.0345532	Abs_PositiveRate_Diff	0.256469	Bernoulli_JSD	0.0345532
ADMET	Classification	Biodegradation	Biodegradation	admet	classification	biodegradation	biodegradation	1660	589	1071	0.354819	589	1071	0.582343	0.239029	0.343314	0.343314	0.062366	Abs_PositiveRate_Diff	0.343314	Bernoulli_JSD	0.062366
ADMET	Classification	carcinogenicity	carcinogenicity	admet	classification	carcinogenicity	carcinogenicity	1632	349	1283	0.213848	349	1283	0.630372	0.429462	0.20091	0.20091	0.0203961	Abs_PositiveRate_Diff	0.20091	Bernoulli_JSD	0.0203961
ADMET	Classification	crustacean	crustacean	admet	classification	crustacean	crustacean	666	192	474	0.288288	192	474	0.427083	0.57384	-0.146756	0.146756	0.0108077	Abs_PositiveRate_Diff	0.146756	Bernoulli_JSD	0.0108077
ADMET	Classification	CYP1A2 substrate	CYP1A2 substrate	admet	classification	cyp1a2_substrate	cyp1a2_substrate	366	30	336	0.0819672	30	336	0.166667	0.5	-0.333333	0.333333	0.06466	Abs_PositiveRate_Diff	0.333333	Bernoulli_JSD	0.06466
ADMET	Classification	Eye corrosion	Eye corrosion	admet	classification	eye_corrosion	eye_corrosion	2298	553	1745	0.240644	553	1745	0.864376	0.233238	0.631138	0.631138	0.218326	Abs_PositiveRate_Diff	0.631138	Bernoulli_JSD	0.218326
ADMET	Classification	Eye irritation	Eye irritation	admet	classification	eye_irritation	eye_irritation	5209	986	4223	0.189288	986	4223	0.927992	0.698556	0.229436	0.229436	0.0459982	Abs_PositiveRate_Diff	0.229436	Bernoulli_JSD	0.0459982
ADMET	Classification	h_ht	h_ht	admet	classification	h_ht	h_ht	2905	236	2669	0.0812392	236	2669	0.444915	0.678906	-0.233991	0.233991	0.0280828	Abs_PositiveRate_Diff	0.233991	Bernoulli_JSD	0.0280828
ADMET	Classification	Genetic tox (micronucleus)	Genetic tox (micronucleus)	admet	classification	micronucleus_tox	micronucleus_tox	641	233	408	0.363495	233	408	0.184549	0.541667	-0.357117	0.357117	0.0712389	Abs_PositiveRate_Diff	0.357117	Bernoulli_JSD	0.0712389
ADMET	Classification	nr_ahr	nr_ahr	admet	classification	nr_ahr	nr_ahr	7183	1733	5450	0.241264	1733	5450	0.0115407	0.15156	-0.140019	0.140019	0.0383532	Abs_PositiveRate_Diff	0.140019	Bernoulli_JSD	0.0383532
ADMET	Classification	nr_ar	nr_ar	admet	classification	nr_ar	nr_ar	7842	1778	6064	0.226728	1778	6064	0.00787402	0.0473285	-0.0394545	0.0394545	0.00802293	Abs_PositiveRate_Diff	0.0394545	Bernoulli_JSD	0.00802293
ADMET	Classification	nr_ar_lbd	nr_ar_lbd	admet	classification	nr_ar_lbd	nr_ar_lbd	6998	1648	5350	0.235496	1648	5350	0.0133495	0.0394393	-0.0260897	0.0260897	0.00345701	Abs_PositiveRate_Diff	0.0260897	Bernoulli_JSD	0.00345701
ADMET	Classification	nr_aromatase	nr_aromatase	admet	classification	nr_aromatase	nr_aromatase	6027	1538	4489	0.255185	1538	4489	0.00845254	0.0603698	-0.0519173	0.0519173	0.0113828	Abs_PositiveRate_Diff	0.0519173	Bernoulli_JSD	0.0113828
ADMET	Classification	nr_er	nr_er	admet	classification	nr_er	nr_er	6661	1637	5024	0.245759	1637	5024	0.0519243	0.134156	-0.0822318	0.0822318	0.0103387	Abs_PositiveRate_Diff	0.0822318	Bernoulli_JSD	0.0103387
ADMET	Classification	nr_er_lbd	nr_er_lbd	admet	classification	nr_er_lbd	nr_er_lbd	7218	1659	5559	0.229842	1659	5559	0.0150693	0.0599029	-0.0448335	0.0448335	0.00743452	Abs_PositiveRate_Diff	0.0448335	Bernoulli_JSD	0.00743452
ADMET	Classification	nr_gr	nr_gr	admet	classification	nr_gr	nr_gr	6046	1423	4623	0.235362	1423	4623	0.0267041	0.121566	-0.0948619	0.0948619	0.0176434	Abs_PositiveRate_Diff	0.0948619	Bernoulli_JSD	0.0176434
ADMET	Classification	nr_ppar_gamma	nr_ppar_gamma	admet	classification	nr_ppar_gamma	nr_ppar_gamma	6714	1650	5064	0.245755	1650	5064	0.0206061	0.0335703	-0.0129642	0.0129642	0.000804747	Abs_PositiveRate_Diff	0.0129642	Bernoulli_JSD	0.000804747
ADMET	Classification	nr_tr	nr_tr	admet	classification	nr_tr	nr_tr	5364	1382	3982	0.257644	1382	3982	0.024602	0.084882	-0.0602799	0.0602799	0.00925813	Abs_PositiveRate_Diff	0.0602799	Bernoulli_JSD	0.00925813
ADMET	Classification	respiratory_tox	respiratory_tox	admet	classification	respiratory_tox	respiratory_tox	3849	639	3210	0.166017	639	3210	0.355243	0.619938	-0.264695	0.264695	0.035476	Abs_PositiveRate_Diff	0.264695	Bernoulli_JSD	0.035476
ADMET	Classification	skin_sens	skin_sens	admet	classification	skin_sens	skin_sens	541	145	396	0.268022	145	396	0.724138	0.621212	0.102926	0.102926	0.00603291	Abs_PositiveRate_Diff	0.102926	Bernoulli_JSD	0.00603291
ADMET	Classification	sr_are	sr_are	admet	classification	sr_are	sr_are	5727	1446	4281	0.252488	1446	4281	0.082296	0.181967	-0.0996708	0.0996708	0.0110663	Abs_PositiveRate_Diff	0.0996708	Bernoulli_JSD	0.0110663
ADMET	Classification	sr_atad5	sr_atad5	admet	classification	sr_atad5	sr_atad5	7307	1692	5615	0.231559	1692	5615	0.0153664	0.0420303	-0.0266638	0.0266638	0.00331048	Abs_PositiveRate_Diff	0.0266638	Bernoulli_JSD	0.00331048
ADMET	Classification	sr_hse	sr_hse	admet	classification	sr_hse	sr_hse	6395	1540	4855	0.240813	1540	4855	0.038961	0.0624099	-0.0234488	0.0234488	0.00144079	Abs_PositiveRate_Diff	0.0234488	Bernoulli_JSD	0.00144079
ADMET	Classification	sr_mmp	sr_mmp	admet	classification	sr_mmp	sr_mmp	6416	1588	4828	0.247506	1588	4828	0.0277078	0.193041	-0.165333	0.165333	0.0386552	Abs_PositiveRate_Diff	0.165333	Bernoulli_JSD	0.0386552
ADMET	Classification	sr_p53	sr_p53	admet	classification	sr_p53	sr_p53	7466	1768	5698	0.236807	1768	5698	0.0192308	0.0809056	-0.0616748	0.0616748	0.0107131	Abs_PositiveRate_Diff	0.0616748	Bernoulli_JSD	0.0107131
MoleculeNet	Classification	clintox	CT_TOX	moleculenet	classification	clintox	CT_TOX	1459	129	1330	0.0884167	129	1330	0.00775194	0.0766917	-0.0689398	0.0689398	0.0169376	Abs_PositiveRate_Diff	0.0689398	Bernoulli_JSD	0.0169376
MoleculeNet	Classification	clintox	FDA_APPROVED	moleculenet	classification	clintox	FDA_APPROVED	1459	129	1330	0.0884167	129	1330	0.992248	0.936842	0.055406	0.055406	0.0127381	Abs_PositiveRate_Diff	0.055406	Bernoulli_JSD	0.0127381
MoleculeNet	Classification	sider	Blood and lymphatic system disorders	moleculenet	classification	sider	Blood and lymphatic system disorders	1427	154	1273	0.107919	154	1273	0.467532	0.638649	-0.171116	0.171116	0.0148848	Abs_PositiveRate_Diff	0.171116	Bernoulli_JSD	0.0148848
MoleculeNet	Classification	sider	Cardiac disorders	moleculenet	classification	sider	Cardiac disorders	1427	154	1273	0.107919	154	1273	0.538961	0.710919	-0.171958	0.171958	0.0158764	Abs_PositiveRate_Diff	0.171958	Bernoulli_JSD	0.0158764
MoleculeNet	Classification	sider	Ear and labyrinth disorders	moleculenet	classification	sider	Ear and labyrinth disorders	1427	154	1273	0.107919	154	1273	0.292208	0.482325	-0.190117	0.190117	0.0191902	Abs_PositiveRate_Diff	0.190117	Bernoulli_JSD	0.0191902
MoleculeNet	Classification	sider	Endocrine disorders	moleculenet	classification	sider	Endocrine disorders	1427	154	1273	0.107919	154	1273	0.136364	0.237235	-0.100871	0.100871	0.00845906	Abs_PositiveRate_Diff	0.100871	Bernoulli_JSD	0.00845906
MoleculeNet	Classification	sider	Eye disorders	moleculenet	classification	sider	Eye disorders	1427	154	1273	0.107919	154	1273	0.448052	0.633936	-0.185884	0.185884	0.0174984	Abs_PositiveRate_Diff	0.185884	Bernoulli_JSD	0.0174984
MoleculeNet	Classification	sider	Gastrointestinal disorders	moleculenet	classification	sider	Gastrointestinal disorders	1427	154	1273	0.107919	154	1273	0.798701	0.923016	-0.124315	0.124315	0.0166327	Abs_PositiveRate_Diff	0.124315	Bernoulli_JSD	0.0166327
MoleculeNet	Classification	sider	Hepatobiliary disorders	moleculenet	classification	sider	Hepatobiliary disorders	1427	154	1273	0.107919	154	1273	0.246753	0.55381	-0.307057	0.307057	0.0500832	Abs_PositiveRate_Diff	0.307057	Bernoulli_JSD	0.0500832
MoleculeNet	Classification	sider	Immune system disorders	moleculenet	classification	sider	Immune system disorders	1427	154	1273	0.107919	154	1273	0.545455	0.738413	-0.192959	0.192959	0.0204377	Abs_PositiveRate_Diff	0.192959	Bernoulli_JSD	0.0204377
MoleculeNet	Classification	sider	Injury, poisoning and procedural complications	moleculenet	classification	sider	Injury, poisoning and procedural complications	1427	154	1273	0.107919	154	1273	0.519481	0.680283	-0.160802	0.160802	0.0135376	Abs_PositiveRate_Diff	0.160802	Bernoulli_JSD	0.0135376
MoleculeNet	Classification	sider	Metabolism and nutrition disorders	moleculenet	classification	sider	Metabolism and nutrition disorders	1427	154	1273	0.107919	154	1273	0.558442	0.714847	-0.156405	0.156405	0.0132969	Abs_PositiveRate_Diff	0.156405	Bernoulli_JSD	0.0132969
MoleculeNet	Classification	sider	Musculoskeletal and connective tissue disorders	moleculenet	classification	sider	Musculoskeletal and connective tissue disorders	1427	154	1273	0.107919	154	1273	0.480519	0.725059	-0.244539	0.244539	0.0316147	Abs_PositiveRate_Diff	0.244539	Bernoulli_JSD	0.0316147
MoleculeNet	Classification	sider	Nervous system disorders	moleculenet	classification	sider	Nervous system disorders	1427	154	1273	0.107919	154	1273	0.733766	0.935585	-0.201819	0.201819	0.0391828	Abs_PositiveRate_Diff	0.201819	Bernoulli_JSD	0.0391828
MoleculeNet	Classification	sider	Renal and urinary disorders	moleculenet	classification	sider	Renal and urinary disorders	1427	154	1273	0.107919	154	1273	0.454545	0.660644	-0.206099	0.206099	0.0216898	Abs_PositiveRate_Diff	0.206099	Bernoulli_JSD	0.0216898
MoleculeNet	Classification	sider	Reproductive system and breast disorders	moleculenet	classification	sider	Reproductive system and breast disorders	1427	154	1273	0.107919	154	1273	0.214286	0.545169	-0.330883	0.330883	0.05961	Abs_PositiveRate_Diff	0.330883	Bernoulli_JSD	0.05961
MoleculeNet	Classification	sider	Respiratory, thoracic and mediastinal disorders	moleculenet	classification	sider	Respiratory, thoracic and mediastinal disorders	1427	154	1273	0.107919	154	1273	0.636364	0.755695	-0.119332	0.119332	0.00845454	Abs_PositiveRate_Diff	0.119332	Bernoulli_JSD	0.00845454
MoleculeNet	Classification	sider	Skin and subcutaneous tissue disorders	moleculenet	classification	sider	Skin and subcutaneous tissue disorders	1427	154	1273	0.107919	154	1273	0.74026	0.945797	-0.205538	0.205538	0.0428668	Abs_PositiveRate_Diff	0.205538	Bernoulli_JSD	0.0428668
MoleculeNet	Classification	sider	Vascular disorders	moleculenet	classification	sider	Vascular disorders	1427	154	1273	0.107919	154	1273	0.662338	0.790259	-0.127922	0.127922	0.010363	Abs_PositiveRate_Diff	0.127922	Bernoulli_JSD	0.010363
MoleculeNet	Classification	tox21	NR-AR	moleculenet	classification	tox21	NR-AR	7823	1775	6048	0.226895	1697	5561	0.0100177	0.0523287	-0.042311	0.042311	0.00809771	Abs_PositiveRate_Diff	0.042311	Bernoulli_JSD	0.00809771
MoleculeNet	Classification	tox21	NR-AR-LBD	moleculenet	classification	tox21	NR-AR-LBD	7823	1775	6048	0.226895	1644	5107	0.0139903	0.0419033	-0.027913	0.027913	0.0037467	Abs_PositiveRate_Diff	0.027913	Bernoulli_JSD	0.0037467
MoleculeNet	Classification	tox21	NR-AhR	moleculenet	classification	tox21	NR-AhR	7823	1775	6048	0.226895	1617	4925	0.0136054	0.151472	-0.137867	0.137867	0.03631	Abs_PositiveRate_Diff	0.137867	Bernoulli_JSD	0.03631
MoleculeNet	Classification	tox21	NR-Aromatase	moleculenet	classification	tox21	NR-Aromatase	7823	1775	6048	0.226895	1522	4293	0.0105125	0.0661542	-0.0556417	0.0556417	0.0116513	Abs_PositiveRate_Diff	0.0556417	Bernoulli_JSD	0.0116513
MoleculeNet	Classification	tox21	NR-ER	moleculenet	classification	tox21	NR-ER	7823	1775	6048	0.226895	1556	4630	0.0604113	0.15054	-0.0901286	0.0901286	0.0110791	Abs_PositiveRate_Diff	0.0901286	Bernoulli_JSD	0.0110791
MoleculeNet	Classification	tox21	NR-ER-LBD	moleculenet	classification	tox21	NR-ER-LBD	7823	1775	6048	0.226895	1670	5278	0.0221557	0.0591133	-0.0369576	0.0369576	0.00453798	Abs_PositiveRate_Diff	0.0369576	Bernoulli_JSD	0.00453798
MoleculeNet	Classification	tox21	NR-PPAR-gamma	moleculenet	classification	tox21	NR-PPAR-gamma	7823	1775	6048	0.226895	1640	4803	0.0231707	0.0308141	-0.00764334	0.00764334	0.000278959	Abs_PositiveRate_Diff	0.00764334	Bernoulli_JSD	0.000278959
MoleculeNet	Classification	tox21	SR-ARE	moleculenet	classification	tox21	SR-ARE	7823	1775	6048	0.226895	1513	4312	0.0938533	0.185529	-0.0916755	0.0916755	0.00888336	Abs_PositiveRate_Diff	0.0916755	Bernoulli_JSD	0.00888336
MoleculeNet	Classification	tox21	SR-ATAD5	moleculenet	classification	tox21	SR-ATAD5	7823	1775	6048	0.226895	1694	5371	0.0206612	0.0426364	-0.0219752	0.0219752	0.00200993	Abs_PositiveRate_Diff	0.0219752	Bernoulli_JSD	0.00200993
MoleculeNet	Classification	tox21	SR-HSE	moleculenet	classification	tox21	SR-HSE	7823	1775	6048	0.226895	1608	4852	0.0466418	0.0612119	-0.0145701	0.0145701	0.000521629	Abs_PositiveRate_Diff	0.0145701	Bernoulli_JSD	0.000521629
MoleculeNet	Classification	tox21	SR-MMP	moleculenet	classification	tox21	SR-MMP	7823	1775	6048	0.226895	1467	4337	0.0381731	0.198755	-0.160582	0.160582	0.0334706	Abs_PositiveRate_Diff	0.160582	Bernoulli_JSD	0.0334706
MoleculeNet	Classification	tox21	SR-p53	moleculenet	classification	tox21	SR-p53	7823	1775	6048	0.226895	1651	5116	0.0211993	0.0758405	-0.0546412	0.0546412	0.00855313	Abs_PositiveRate_Diff	0.0546412	Bernoulli_JSD	0.00855313
MoleculeNet	Classification	toxcast	APR_HepG2_CellLoss_24h_dn	moleculenet	classification	toxcast	APR_HepG2_CellLoss_24h_dn	8577	1956	6621	0.228052	223	811	0.2287	0.307028	-0.0783288	0.0783288	0.00392142	Abs_PositiveRate_Diff	0.0783288	Bernoulli_JSD	0.00392142
MoleculeNet	Classification	toxcast	APR_HepG2_MitoMembPot_24h_dn	moleculenet	classification	toxcast	APR_HepG2_MitoMembPot_24h_dn	8577	1956	6621	0.228052	223	811	0.0852018	0.208385	-0.123183	0.123183	0.0155549	Abs_PositiveRate_Diff	0.123183	Bernoulli_JSD	0.0155549
MoleculeNet	Classification	toxcast	APR_HepG2_OxidativeStress_24h_up	moleculenet	classification	toxcast	APR_HepG2_OxidativeStress_24h_up	8577	1956	6621	0.228052	223	811	0.197309	0.244143	-0.0468336	0.0468336	0.00159637	Abs_PositiveRate_Diff	0.0468336	Bernoulli_JSD	0.00159637
MoleculeNet	Classification	toxcast	APR_Hepat_Apoptosis_24hr_up	moleculenet	classification	toxcast	APR_Hepat_Apoptosis_24hr_up	8577	1956	6621	0.228052	40	263	0.075	0.155894	-0.0808935	0.0808935	0.00816288	Abs_PositiveRate_Diff	0.0808935	Bernoulli_JSD	0.00816288
MoleculeNet	Classification	toxcast	NVS_ENZ_hAChE	moleculenet	classification	toxcast	NVS_ENZ_hAChE	8577	1956	6621	0.228052	36	106	0.5	0.471698	0.0283019	0.0283019	0.000400873	Abs_PositiveRate_Diff	0.0283019	Bernoulli_JSD	0.000400873
MoleculeNet	Classification	toxcast	NVS_ENZ_oCOX1	moleculenet	classification	toxcast	NVS_ENZ_oCOX1	8577	1956	6621	0.228052	21	119	0.333333	0.647059	-0.313725	0.313725	0.0500737	Abs_PositiveRate_Diff	0.313725	Bernoulli_JSD	0.0500737
MoleculeNet	Classification	toxcast	NVS_ENZ_oCOX2	moleculenet	classification	toxcast	NVS_ENZ_oCOX2	8577	1956	6621	0.228052	15	88	0.466667	0.613636	-0.14697	0.14697	0.0109109	Abs_PositiveRate_Diff	0.14697	Bernoulli_JSD	0.0109109
MoleculeNet	Classification	toxcast	NVS_IC_hKhERGCh	moleculenet	classification	toxcast	NVS_IC_hKhERGCh	8577	1956	6621	0.228052	13	78	0.153846	0.487179	-0.333333	0.333333	0.0661847	Abs_PositiveRate_Diff	0.333333	Bernoulli_JSD	0.0661847
MoleculeNet	Classification	toxcast	NVS_NR_hAR	moleculenet	classification	toxcast	NVS_NR_hAR	8577	1956	6621	0.228052	39	189	0.205128	0.550265	-0.345136	0.345136	0.0651673	Abs_PositiveRate_Diff	0.345136	Bernoulli_JSD	0.0651673
MoleculeNet	Classification	toxcast	NVS_NR_hER	moleculenet	classification	toxcast	NVS_NR_hER	8577	1956	6621	0.228052	220	908	0.122727	0.225771	-0.103044	0.103044	0.00934039	Abs_PositiveRate_Diff	0.103044	Bernoulli_JSD	0.00934039
MoleculeNet	Classification	toxcast	NVS_NR_hPPARg	moleculenet	classification	toxcast	NVS_NR_hPPARg	8577	1956	6621	0.228052	173	607	0.196532	0.240527	-0.0439954	0.0439954	0.0014187	Abs_PositiveRate_Diff	0.0439954	Bernoulli_JSD	0.0014187
MoleculeNet	Classification	toxcast	NVS_NR_hPXR	moleculenet	classification	toxcast	NVS_NR_hPXR	8577	1956	6621	0.228052	133	381	0.270677	0.19685	0.0738263	0.0738263	0.00381616	Abs_PositiveRate_Diff	0.0738263	Bernoulli_JSD	0.00381616
MoleculeNet	Classification	toxcast	Tanguay_ZF_120hpf_AXIS_up	moleculenet	classification	toxcast	Tanguay_ZF_120hpf_AXIS_up	8577	1956	6621	0.228052	227	794	0.0792952	0.120907	-0.0416116	0.0416116	0.00241861	Abs_PositiveRate_Diff	0.0416116	Bernoulli_JSD	0.00241861
MoleculeNet	Classification	toxcast	Tanguay_ZF_120hpf_BRAI_up	moleculenet	classification	toxcast	Tanguay_ZF_120hpf_BRAI_up	8577	1956	6621	0.228052	227	794	0.0352423	0.0692695	-0.0340272	0.0340272	0.00297352	Abs_PositiveRate_Diff	0.0340272	Bernoulli_JSD	0.00297352
MoleculeNet	Classification	toxcast	Tanguay_ZF_120hpf_MORT_up	moleculenet	classification	toxcast	Tanguay_ZF_120hpf_MORT_up	8577	1956	6621	0.228052	229	805	0.0524017	0.140373	-0.0879709	0.0879709	0.0114882	Abs_PositiveRate_Diff	0.0879709	Bernoulli_JSD	0.0114882
ADMET	Regression	BBB (CNS)	label	admet	regression	bbb_cns	label	153	23	130	0.150327	23	130						Abs_StandardizedMeanDiff	0.697489	KS_Statistic	0.367559	-3.23478	-2.46154	0.955181	1.12638	-0.773244	0.697489	0.367559
ADMET	Regression	bioconcf	label	admet	regression	bioconcf	label	676	115	561	0.170118	115	561						Abs_StandardizedMeanDiff	0.503078	KS_Statistic	0.256235	1.19918	1.876	1.20551	1.37032	-0.676823	0.503078	0.256235
ADMET	Regression	Boiling point	label	admet	regression	bp	label	5402	2652	2750	0.490929	2652	2750						Abs_StandardizedMeanDiff	1.04213	KS_Statistic	0.46402	149.112	227.67	77.9509	72.7987	-78.5581	1.04213	0.46402
ADMET	Regression	Marine tox (Fathead minnow)	label	admet	regression	fm_reg	label	867	295	572	0.340254	295	572						Abs_StandardizedMeanDiff	0.508902	KS_Statistic	0.247535	3.3175	4.12831	1.51803	1.62859	-0.810811	0.508902	0.247535
ADMET	Regression	Hydration energy	label	admet	regression	hydratione	label	640	318	322	0.496875	318	322						Abs_StandardizedMeanDiff	0.79832	KS_Statistic	0.382867	-2.35849	-5.2191	3.2094	3.90999	2.86061	0.79832	0.382867
ADMET	Regression	Marine tox (Daphnia magna)	label	admet	regression	lc50dm	label	346	102	244	0.294798	102	244						Abs_StandardizedMeanDiff	0.802351	KS_Statistic	0.446239	3.82075	5.12853	1.91009	1.49269	-1.30779	0.802351	0.446239
ADMET	Regression	logP	label	admet	regression	logp	label	14848	1223	13625	0.082368	1223	13625						Abs_StandardizedMeanDiff	0.58646	KS_Statistic	0.269631	1.04731	2.12379	2.10953	1.80887	-1.07649	0.58646	0.269631
ADMET	Regression	logS	label	admet	regression	logs	label	9961	2537	7424	0.254693	2537	7424						Abs_StandardizedMeanDiff	0.616334	KS_Statistic	0.311523	-1.91969	-3.27892	2.24242	2.19231	1.35923	0.616334	0.311523
ADMET	Regression	logVP	label	admet	regression	logvp	label	2692	1226	1466	0.455423	1226	1466						Abs_StandardizedMeanDiff	1.15202	KS_Statistic	0.459911	-0.0958528	-3.66571	2.69245	3.40004	3.56986	1.15202	0.459911
ADMET	Regression	Melting point	label	admet	regression	mp	label	8548	2125	6423	0.248596	2125	6423						Abs_StandardizedMeanDiff	1.25866	KS_Statistic	0.489626	-2.34921	107.056	89.6242	85.9995	-109.405	1.25866	0.489626
ADMET	Regression	pka	label	admet	regression	pka	label	3195	506	2689	0.158372	506	2689						Abs_StandardizedMeanDiff	0.182583	KS_Statistic	0.172517	6.0257	6.64416	3.39787	3.38432	-0.618458	0.182583	0.172517
ADMET	Regression	pkb	label	admet	regression	pkb	label	3662	591	3071	0.161387	591	3071						Abs_StandardizedMeanDiff	0.890059	KS_Statistic	0.436607	8.86438	6.11578	2.5911	3.174	2.7486	0.890059	0.436607
ADMET	Regression	Tetraphymena pyriformis	label	admet	regression	pyriformis_reg	label	1745	751	994	0.430372	751	994						Abs_StandardizedMeanDiff	0.760846	KS_Statistic	0.386158	2.33647	3.36426	1.57966	1.14699	-1.02779	0.760846	0.386158
ADMET	Regression	rat_acute_reg	label	admet	regression	rat_acute_reg	label	10130	2283	7847	0.22537	2283	7847						Abs_StandardizedMeanDiff	0.265499	KS_Statistic	0.212693	2.29475	2.53505	0.99234	0.878026	-0.240306	0.265499	0.212693
ADMET	Regression	rat_chronic	label	admet	regression	rat_chronic	label	380	56	324	0.147368	56	324						Abs_StandardizedMeanDiff	0.204789	KS_Statistic	0.127205	1.28534	1.49174	1.15256	0.978707	-0.206401	0.204789	0.127205
ADMET	Regression	Skin permeability	label	admet	regression	skin_permeability	label	186	74	112	0.397849	74	112						Abs_StandardizedMeanDiff	0.0760596	KS_Statistic	0.162645	-2.78284	-2.70366	0.925676	1.1037	-0.0791771	0.0760596	0.162645
MoleculeNet	Regression	esol	measured log solubility in mols per litre	moleculenet	regression	esol	measured log solubility in mols per litre	1117	316	801	0.282901	316	801						Abs_StandardizedMeanDiff	0.797365	KS_Statistic	0.378811	-1.92199	-3.49541	1.82015	2.02861	1.57343	0.797365	0.378811
MoleculeNet	Regression	freesolv	expt	moleculenet	regression	freesolv	expt	642	320	322	0.498442	320	322						Abs_StandardizedMeanDiff	0.793018	KS_Statistic	0.380862	-2.37806	-5.2191	3.21027	3.90999	2.84104	0.793018	0.380862
MoleculeNet	Regression	qm7	u0_atom	moleculenet	regression	qm7	u0_atom	6832	3035	3797	0.444233	3035	3797						Abs_StandardizedMeanDiff	0.067963	KS_Statistic	0.0586015	-1553.2	-1538.06	239.044	208.845	-15.1415	0.067963	0.0586015
MoleculeNet	Regression	qm8	E1-CAM	moleculenet	regression	qm8	E1-CAM	21766	3643	18123	0.167371	3643	18123						Abs_StandardizedMeanDiff	0.312218	KS_Statistic	0.157558	0.205369	0.219188	0.048391	0.0433812	-0.013819	0.312218	0.157558
MoleculeNet	Regression	qm8	E1-CC2	moleculenet	regression	qm8	E1-CC2	21766	3643	18123	0.167371	3643	18123						Abs_StandardizedMeanDiff	0.168881	KS_Statistic	0.136072	0.213995	0.221379	0.0509381	0.0421227	-0.00738403	0.168881	0.136072
MoleculeNet	Regression	qm8	E1-PBE0	moleculenet	regression	qm8	E1-PBE0	21766	3643	18123	0.167371	3643	18123						Abs_StandardizedMeanDiff	0.29246	KS_Statistic	0.155117	0.20518	0.219092	0.0516872	0.0466961	-0.0139122	0.29246	0.155117
MoleculeNet	Regression	qm8	E2-CAM	moleculenet	regression	qm8	E2-CAM	21766	3643	18123	0.167371	3643	18123						Abs_StandardizedMeanDiff	0.133383	KS_Statistic	0.0784437	0.240713	0.2455	0.0412107	0.0347203	-0.00478704	0.133383	0.0784437
MoleculeNet	Regression	qm8	E2-CC2	moleculenet	regression	qm8	E2-CC2	21766	3643	18123	0.167371	3643	18123						Abs_StandardizedMeanDiff	0.129718	KS_Statistic	0.114377	0.252698	0.24823	0.0408058	0.0330128	0.00446763	0.129718	0.114377
MoleculeNet	Regression	qm8	E2-PBE0	moleculenet	regression	qm8	E2-PBE0	21766	3643	18123	0.167371	3643	18123						Abs_StandardizedMeanDiff	0.155517	KS_Statistic	0.0774981	0.237118	0.243371	0.0448586	0.0392009	-0.0062525	0.155517	0.0774981
MoleculeNet	Regression	qm9	alpha	moleculenet	regression	qm9	alpha	133798	13998	119800	0.10462	13998	119800						Abs_StandardizedMeanDiff	0.0014319	KS_Statistic	0.0628556	75.2033	75.1916	10.5419	7.86629	0.0117234	0.0014319	0.0628556
MoleculeNet	Regression	qm9	cv	moleculenet	regression	qm9	cv	133798	13998	119800	0.10462	13998	119800						Abs_StandardizedMeanDiff	1.04912	KS_Statistic	0.437542	35.2362	31.179	4.42877	3.79617	4.05718	1.04912	0.437542
MoleculeNet	Regression	qm9	g298	moleculenet	regression	qm9	g298	133798	13998	119800	0.10462	13998	119800						Abs_StandardizedMeanDiff	0.151622	KS_Statistic	0.146136	-417.004	-410.937	51.5654	38.4391	-6.06709	0.151622	0.146136
MoleculeNet	Regression	qm9	gap	moleculenet	regression	qm9	gap	133798	13998	119800	0.10462	13998	119800						Abs_StandardizedMeanDiff	0.0263774	KS_Statistic	0.0515603	0.250019	0.251272	0.0473795	0.0475204	-0.00125308	0.0263774	0.0515603
MoleculeNet	Regression	qm9	h298	moleculenet	regression	qm9	h298	133798	13998	119800	0.10462	13998	119800						Abs_StandardizedMeanDiff	0.151501	KS_Statistic	0.145581	-416.956	-410.894	51.5642	38.4385	-6.06215	0.151501	0.145581
MoleculeNet	Regression	qm9	homo	moleculenet	regression	qm9	homo	133798	13998	119800	0.10462	13998	119800						Abs_StandardizedMeanDiff	0.830386	KS_Statistic	0.382398	-0.255927	-0.238114	0.0196447	0.0216527	-0.0178131	0.830386	0.382398
MoleculeNet	Regression	qm9	lumo	moleculenet	regression	qm9	lumo	133798	13998	119800	0.10462	13998	119800						Abs_StandardizedMeanDiff	0.409496	KS_Statistic	0.151253	-0.00590762	0.0131582	0.0457654	0.0466509	-0.0190659	0.409496	0.151253
MoleculeNet	Regression	qm9	mu	moleculenet	regression	qm9	mu	133798	13998	119800	0.10462	13998	119800						Abs_StandardizedMeanDiff	0.264813	KS_Statistic	0.12013	3.06771	2.66377	1.78783	1.49167	0.403935	0.264813	0.12013
MoleculeNet	Regression	qm9	r2	moleculenet	regression	qm9	r2	133798	13998	119800	0.10462	13998	119800						Abs_StandardizedMeanDiff	1.46977	KS_Statistic	0.513533	1525.37	1150.33	409.068	230.579	375.04	1.46977	0.513533
MoleculeNet	Regression	qm9	u0	moleculenet	regression	qm9	u0	133798	13998	119800	0.10462	13998	119800						Abs_StandardizedMeanDiff	0.151547	KS_Statistic	0.145806	-416.968	-410.904	51.5646	38.4386	-6.06403	0.151547	0.145806
MoleculeNet	Regression	qm9	u298	moleculenet	regression	qm9	u298	133798	13998	119800	0.10462	13998	119800						Abs_StandardizedMeanDiff	0.151501	KS_Statistic	0.145581	-416.957	-410.895	51.5642	38.4385	-6.06215	0.151501	0.145581
MoleculeNet	Regression	qm9	zpve	moleculenet	regression	qm9	zpve	133798	13998	119800	0.10462	13998	119800						Abs_StandardizedMeanDiff	0.0916021	KS_Statistic	0.0827569	0.151277	0.148232	0.0383539	0.0326029	0.00304589	0.0916021	0.0827569

## Sheet: Figure 3
Figure panel	Plot element	Method	Selection rule	Benchmark	TaskType	Dataset	Fold	Overall_NoScaffold_Count	Overall_Total_Count	Overall_Proportion	Overall_pct	Train_NoScaffold_Count	Train_Total_Count	Train_Proportion	Train_pct	Valid_NoScaffold_Count	Valid_Total_Count	Valid_Proportion	Valid_pct	Test_NoScaffold_Count	Test_Total_Count	Test_Proportion	Test_pct	MaxEval_Proportion	MaxEval_pct	Train_overall_ratio	Train-Minus-Overall	Valid-Minus-Overall	Test-Minus-Overall	Valid+Test_NoScaffold_Count	Max(|Valid-Overall|,|Test-Overall|)
Fig. 3a	Box/scatter: Overall, Train, Max eval	Scaffold Split	Train-depleted representative fold selected from all Scaffold folds	admet	Classification	ames	fold_1	1294	7653	0.169084	16.9084	0	5239	0	0	0	520	0	0	1294	1894	0.68321	68.321	0.68321	68.321	0	-0.169084	-0.169084	0.514126	1294	0.514126
Fig. 3a	Box/scatter: Overall, Train, Max eval	Scaffold Split	Train-depleted representative fold selected from all Scaffold folds	admet	Classification	avian_tox	fold_1	100	579	0.172712	17.2712	0	217	0	0	0	179	0	0	100	183	0.546448	54.6448	0.546448	54.6448	0	-0.172712	-0.172712	0.373737	100	0.373737
Fig. 3a	Box/scatter: Overall, Train, Max eval	Scaffold Split	Train-depleted representative fold selected from all Scaffold folds	admet	Classification	bee_tox	fold_1	36	182	0.197802	19.7802	0	107	0	0	0	19	0	0	36	56	0.642857	64.2857	0.642857	64.2857	0	-0.197802	-0.197802	0.445055	36	0.445055
Fig. 3a	Box/scatter: Overall, Train, Max eval	Scaffold Split	Train-depleted representative fold selected from all Scaffold folds	admet	Classification	biodegradation	fold_1	589	1660	0.354819	35.4819	0	938	0	0	0	48	0	0	589	674	0.873887	87.3887	0.873887	87.3887	0	-0.354819	-0.354819	0.519068	589	0.519068
Fig. 3a	Box/scatter: Overall, Train, Max eval	Scaffold Split	Train-depleted representative fold selected from all Scaffold folds	admet	Classification	carcinogenicity	fold_1	349	1632	0.213848	21.3848	0	740	0	0	0	133	0	0	349	759	0.459816	45.9816	0.459816	45.9816	0	-0.213848	-0.213848	0.245968	349	0.245968
Fig. 3a	Box/scatter: Overall, Train, Max eval	Scaffold Split	Train-depleted representative fold selected from all Scaffold folds	admet	Classification	crustacean	fold_1	192	666	0.288288	28.8288	0	195	0	0	0	220	0	0	192	251	0.76494	76.494	0.76494	76.494	0	-0.288288	-0.288288	0.476652	192	0.476652
Fig. 3a	Box/scatter: Overall, Train, Max eval	Scaffold Split	Train-depleted representative fold selected from all Scaffold folds	admet	Classification	cyp1a2_substrate	fold_1	30	366	0.0819672	8.19672	0	183	0	0	0	99	0	0	30	84	0.357143	35.7143	0.357143	35.7143	0	-0.0819672	-0.0819672	0.275176	30	0.275176
Fig. 3a	Box/scatter: Overall, Train, Max eval	Scaffold Split	Train-depleted representative fold selected from all Scaffold folds	admet	Classification	eye_corrosion	fold_1	553	2298	0.240644	24.0644	0	970	0	0	0	189	0	0	553	1139	0.485514	48.5514	0.485514	48.5514	0	-0.240644	-0.240644	0.24487	553	0.24487
Fig. 3a	Box/scatter: Overall, Train, Max eval	Scaffold Split	Train-depleted representative fold selected from all Scaffold folds	admet	Classification	eye_irritation	fold_1	986	5209	0.189288	18.9288	0	3819	0	0	0	188	0	0	986	1202	0.8203	82.03	0.8203	82.03	0	-0.189288	-0.189288	0.631012	986	0.631012
Fig. 3a	Box/scatter: Overall, Train, Max eval	Scaffold Split	Train-depleted representative fold selected from all Scaffold folds	admet	Classification	h_ht	fold_1	236	2905	0.0812392	8.12392	0	1684	0	0	0	614	0	0	236	607	0.388797	38.8797	0.388797	38.8797	0	-0.0812392	-0.0812392	0.307558	236	0.307558
Fig. 3a	Box/scatter: Overall, Train, Max eval	Scaffold Split	Train-depleted representative fold selected from all Scaffold folds	admet	Classification	micronucleus_tox	fold_1	233	641	0.363495	36.3495	0	189	0	0	0	56	0	0	233	396	0.588384	58.8384	0.588384	58.8384	0	-0.363495	-0.363495	0.224889	233	0.363495
Fig. 3a	Box/scatter: Overall, Train, Max eval	Scaffold Split	Train-depleted representative fold selected from all Scaffold folds	admet	Classification	nr_ahr	fold_1	1733	7183	0.241264	24.1264	0	4545	0	0	0	339	0	0	1733	2299	0.753806	75.3806	0.753806	75.3806	0	-0.241264	-0.241264	0.512542	1733	0.512542
Fig. 3a	Box/scatter: Overall, Train, Max eval	Scaffold Split	Train-depleted representative fold selected from all Scaffold folds	admet	Classification	nr_ar	fold_1	1778	7842	0.226728	22.6728	0	5123	0	0	0	539	0	0	1778	2180	0.815596	81.5596	0.815596	81.5596	0	-0.226728	-0.226728	0.588868	1778	0.588868
Fig. 3a	Box/scatter: Overall, Train, Max eval	Scaffold Split	Train-depleted representative fold selected from all Scaffold folds	admet	Classification	nr_ar_lbd	fold_1	1648	6998	0.235496	23.5496	0	4521	0	0	0	437	0	0	1648	2040	0.807843	80.7843	0.807843	80.7843	0	-0.235496	-0.235496	0.572347	1648	0.572347
Fig. 3a	Box/scatter: Overall, Train, Max eval	Scaffold Split	Train-depleted representative fold selected from all Scaffold folds	admet	Classification	nr_aromatase	fold_1	1538	6027	0.255185	25.5185	0	3804	0	0	0	341	0	0	1538	1882	0.817216	81.7216	0.817216	81.7216	0	-0.255185	-0.255185	0.562031	1538	0.562031
Fig. 3a	Box/scatter: Overall, Train, Max eval	Scaffold Split	Train-depleted representative fold selected from all Scaffold folds	admet	Classification	nr_er	fold_1	1637	6661	0.245759	24.5759	0	4283	0	0	0	348	0	0	1637	2030	0.806404	80.6404	0.806404	80.6404	0	-0.245759	-0.245759	0.560645	1637	0.560645
Fig. 3a	Box/scatter: Overall, Train, Max eval	Scaffold Split	Train-depleted representative fold selected from all Scaffold folds	admet	Classification	nr_er_lbd	fold_1	1659	7218	0.229842	22.9842	0	4586	0	0	0	619	0	0	1659	2013	0.824143	82.4143	0.824143	82.4143	0	-0.229842	-0.229842	0.594301	1659	0.594301
Fig. 3a	Box/scatter: Overall, Train, Max eval	Scaffold Split	Train-depleted representative fold selected from all Scaffold folds	admet	Classification	nr_gr	fold_1	1423	6046	0.235362	23.5362	0	3948	0	0	0	351	0	0	1423	1747	0.814539	81.4539	0.814539	81.4539	0	-0.235362	-0.235362	0.579177	1423	0.579177
Fig. 3a	Box/scatter: Overall, Train, Max eval	Scaffold Split	Train-depleted representative fold selected from all Scaffold folds	admet	Classification	nr_ppar_gamma	fold_1	1650	6714	0.245755	24.5755	0	4337	0	0	0	361	0	0	1650	2016	0.818452	81.8452	0.818452	81.8452	0	-0.245755	-0.245755	0.572697	1650	0.572697
Fig. 3a	Box/scatter: Overall, Train, Max eval	Scaffold Split	Train-depleted representative fold selected from all Scaffold folds	admet	Classification	nr_tr	fold_1	1382	5364	0.257644	25.7644	0	3401	0	0	0	281	0	0	1382	1682	0.821641	82.1641	0.821641	82.1641	0	-0.257644	-0.257644	0.563997	1382	0.563997
Fig. 3a	Box/scatter: Overall, Train, Max eval	Scaffold Split	Train-depleted representative fold selected from all Scaffold folds	admet	Classification	respiratory_tox	fold_1	639	3849	0.166017	16.6017	0	2168	0	0	0	772	0	0	639	909	0.70297	70.297	0.70297	70.297	0	-0.166017	-0.166017	0.536953	639	0.536953
Fig. 3a	Box/scatter: Overall, Train, Max eval	Scaffold Split	Train-depleted representative fold selected from all Scaffold folds	admet	Classification	skin_sens	fold_1	145	541	0.268022	26.8022	0	143	0	0	0	57	0	0	145	341	0.42522	42.522	0.42522	42.522	0	-0.268022	-0.268022	0.157198	145	0.268022
Fig. 3a	Box/scatter: Overall, Train, Max eval	Scaffold Split	Train-depleted representative fold selected from all Scaffold folds	admet	Classification	sr_are	fold_1	1446	5727	0.252488	25.2488	0	3645	0	0	0	284	0	0	1446	1798	0.804227	80.4227	0.804227	80.4227	0	-0.252488	-0.252488	0.551739	1446	0.551739
Fig. 3a	Box/scatter: Overall, Train, Max eval	Scaffold Split	Train-depleted representative fold selected from all Scaffold folds	admet	Classification	sr_atad5	fold_1	1692	7307	0.231559	23.1559	0	4591	0	0	0	462	0	0	1692	2254	0.750665	75.0665	0.750665	75.0665	0	-0.231559	-0.231559	0.519107	1692	0.519107
Fig. 3a	Box/scatter: Overall, Train, Max eval	Scaffold Split	Train-depleted representative fold selected from all Scaffold folds	admet	Classification	sr_hse	fold_1	1540	6395	0.240813	24.0813	0	4161	0	0	0	369	0	0	1540	1865	0.825737	82.5737	0.825737	82.5737	0	-0.240813	-0.240813	0.584924	1540	0.584924
Fig. 3a	Box/scatter: Overall, Train, Max eval	Scaffold Split	Train-depleted representative fold selected from all Scaffold folds	admet	Classification	sr_mmp	fold_1	1588	6416	0.247506	24.7506	0	4033	0	0	0	418	0	0	1588	1965	0.808142	80.8142	0.808142	80.8142	0	-0.247506	-0.247506	0.560636	1588	0.560636
Fig. 3a	Box/scatter: Overall, Train, Max eval	Scaffold Split	Train-depleted representative fold selected from all Scaffold folds	admet	Classification	sr_p53	fold_1	1768	7466	0.236807	23.6807	0	4907	0	0	0	389	0	0	1768	2170	0.814747	81.4747	0.814747	81.4747	0	-0.236807	-0.236807	0.57794	1768	0.57794
Fig. 3a	Box/scatter: Overall, Train, Max eval	Scaffold Split	Train-depleted representative fold selected from all Scaffold folds	admet	Regression	bbb_cns	fold_1	23	153	0.150327	15.0327	0	71	0	0	23	43	0.534884	53.4884	0	39	0	0	0.534884	53.4884	0	-0.150327	0.384557	-0.150327	23	0.384557
Fig. 3a	Box/scatter: Overall, Train, Max eval	Scaffold Split	Train-depleted representative fold selected from all Scaffold folds	admet	Regression	bioconcF	fold_1	115	676	0.170118	17.0118	0	413	0	0	0	61	0	0	115	202	0.569307	56.9307	0.569307	56.9307	0	-0.170118	-0.170118	0.399189	115	0.399189
Fig. 3a	Box/scatter: Overall, Train, Max eval	Scaffold Split	Train-depleted representative fold selected from all Scaffold folds	admet	Regression	bp	fold_3	2652	5402	0.490929	49.0929	0	1061	0	0	2652	2851	0.9302	93.02	0	1490	0	0	0.9302	93.02	0	-0.490929	0.439271	-0.490929	2652	0.490929
Fig. 3a	Box/scatter: Overall, Train, Max eval	Scaffold Split	Train-depleted representative fold selected from all Scaffold folds	admet	Regression	fm_reg	fold_1	295	867	0.340254	34.0254	0	177	0	0	295	348	0.847701	84.7701	0	342	0	0	0.847701	84.7701	0	-0.340254	0.507447	-0.340254	295	0.507447
Fig. 3a	Box/scatter: Overall, Train, Max eval	Scaffold Split	Train-depleted representative fold selected from all Scaffold folds	admet	Regression	hydrationE	fold_1	318	640	0.496875	49.6875	0	240	0	0	0	51	0	0	318	349	0.911175	91.1175	0.911175	91.1175	0	-0.496875	-0.496875	0.4143	318	0.496875
Fig. 3a	Box/scatter: Overall, Train, Max eval	Scaffold Split	Train-depleted representative fold selected from all Scaffold folds	admet	Regression	lc50dm	fold_1	102	346	0.294798	29.4798	0	202	0	0	102	121	0.842975	84.2975	0	23	0	0	0.842975	84.2975	0	-0.294798	0.548178	-0.294798	102	0.548178
Fig. 3a	Box/scatter: Overall, Train, Max eval	Scaffold Split	Train-depleted representative fold selected from all Scaffold folds	admet	Regression	logp	fold_6	1223	14848	0.082368	8.2368	0	7627	0	0	1223	6175	0.198057	19.8057	0	1046	0	0	0.198057	19.8057	0	-0.082368	0.115689	-0.082368	1223	0.115689
Fig. 3a	Box/scatter: Overall, Train, Max eval	Scaffold Split	Train-depleted representative fold selected from all Scaffold folds	admet	Regression	logs	fold_7	2537	9961	0.254693	25.4693	0	6232	0	0	2537	2940	0.862925	86.2925	0	789	0	0	0.862925	86.2925	0	-0.254693	0.608232	-0.254693	2537	0.608232
Fig. 3a	Box/scatter: Overall, Train, Max eval	Scaffold Split	Train-depleted representative fold selected from all Scaffold folds	admet	Regression	logvp	fold_4	1226	2692	0.455423	45.5423	0	685	0	0	1226	1829	0.670312	67.0312	0	178	0	0	0.670312	67.0312	0	-0.455423	0.214888	-0.455423	1226	0.455423
Fig. 3a	Box/scatter: Overall, Train, Max eval	Scaffold Split	Train-depleted representative fold selected from all Scaffold folds	admet	Regression	mp	fold_5	2125	8548	0.248596	24.8596	0	3300	0	0	2125	2653	0.80098	80.098	0	2595	0	0	0.80098	80.098	0	-0.248596	0.552384	-0.248596	2125	0.552384
Fig. 3a	Box/scatter: Overall, Train, Max eval	Scaffold Split	Train-depleted representative fold selected from all Scaffold folds	admet	Regression	pka	fold_7	506	3195	0.158372	15.8372	0	2315	0	0	506	696	0.727011	72.7011	0	184	0	0	0.727011	72.7011	0	-0.158372	0.568639	-0.158372	506	0.568639
Fig. 3a	Box/scatter: Overall, Train, Max eval	Scaffold Split	Train-depleted representative fold selected from all Scaffold folds	admet	Regression	pkb	fold_5	591	3662	0.161387	16.1387	0	2608	0	0	591	811	0.72873	72.873	0	243	0	0	0.72873	72.873	0	-0.161387	0.567343	-0.161387	591	0.567343
Fig. 3a	Box/scatter: Overall, Train, Max eval	Scaffold Split	Train-depleted representative fold selected from all Scaffold folds	admet	Regression	pyriformis_reg	fold_4	751	1745	0.430372	43.0372	0	268	0	0	751	777	0.966538	96.6538	0	700	0	0	0.966538	96.6538	0	-0.430372	0.536165	-0.430372	751	0.536165
Fig. 3a	Box/scatter: Overall, Train, Max eval	Scaffold Split	Train-depleted representative fold selected from all Scaffold folds	admet	Regression	rat_acute_reg	fold_3	2283	10130	0.22537	22.537	0	4575	0	0	2283	2868	0.796025	79.6025	0	2687	0	0	0.796025	79.6025	0	-0.22537	0.570655	-0.22537	2283	0.570655
Fig. 3a	Box/scatter: Overall, Train, Max eval	Scaffold Split	Train-depleted representative fold selected from all Scaffold folds	admet	Regression	rat_chronic	fold_1	56	380	0.147368	14.7368	0	230	0	0	56	99	0.565657	56.5657	0	51	0	0	0.565657	56.5657	0	-0.147368	0.418288	-0.147368	56	0.418288
Fig. 3a	Box/scatter: Overall, Train, Max eval	Scaffold Split	Train-depleted representative fold selected from all Scaffold folds	admet	Regression	skin_permeability	fold_4	74	186	0.397849	39.7849	0	34	0	0	74	88	0.840909	84.0909	0	64	0	0	0.840909	84.0909	0	-0.397849	0.44306	-0.397849	74	0.44306
Fig. 3a	Box/scatter: Overall, Train, Max eval	Scaffold Split	Train-depleted representative fold selected from all Scaffold folds	moleculenet	Classification	clintox	fold_1	129	1459	0.0884167	8.84167	0	813	0	0	0	345	0	0	129	301	0.428571	42.8571	0.428571	42.8571	0	-0.0884167	-0.0884167	0.340155	129	0.340155
Fig. 3a	Box/scatter: Overall, Train, Max eval	Scaffold Split	Train-depleted representative fold selected from all Scaffold folds	moleculenet	Classification	sider	fold_1	154	1427	0.107919	10.7919	0	841	0	0	0	159	0	0	154	427	0.360656	36.0656	0.360656	36.0656	0	-0.107919	-0.107919	0.252737	154	0.252737
Fig. 3a	Box/scatter: Overall, Train, Max eval	Scaffold Split	Train-depleted representative fold selected from all Scaffold folds	moleculenet	Classification	tox21	fold_1	1775	7823	0.226895	22.6895	0	3752	0	0	0	1864	0	0	1775	2207	0.804259	80.4259	0.804259	80.4259	0	-0.226895	-0.226895	0.577364	1775	0.577364
Fig. 3a	Box/scatter: Overall, Train, Max eval	Scaffold Split	Train-depleted representative fold selected from all Scaffold folds	moleculenet	Classification	toxcast	fold_1	1956	8577	0.228052	22.8052	0	5586	0	0	0	442	0	0	1956	2549	0.76736	76.736	0.76736	76.736	0	-0.228052	-0.228052	0.539308	1956	0.539308
Fig. 3a	Box/scatter: Overall, Train, Max eval	Scaffold Split	Train-depleted representative fold selected from all Scaffold folds	moleculenet	Regression	esol	fold_1	316	1117	0.282901	28.2901	0	651	0	0	316	413	0.765133	76.5133	0	53	0	0	0.765133	76.5133	0	-0.282901	0.482233	-0.282901	316	0.482233
Fig. 3a	Box/scatter: Overall, Train, Max eval	Scaffold Split	Train-depleted representative fold selected from all Scaffold folds	moleculenet	Regression	freesolv	fold_1	320	642	0.498442	49.8442	0	125	0	0	320	334	0.958084	95.8084	0	183	0	0	0.958084	95.8084	0	-0.498442	0.459641	-0.498442	320	0.498442
Fig. 3a	Box/scatter: Overall, Train, Max eval	Scaffold Split	Train-depleted representative fold selected from all Scaffold folds	moleculenet	Regression	qm7	fold_1	3035	6832	0.444233	44.4233	0	2975	0	0	3035	3223	0.941669	94.1669	0	634	0	0	0.941669	94.1669	0	-0.444233	0.497436	-0.444233	3035	0.497436
Fig. 3a	Box/scatter: Overall, Train, Max eval	Scaffold Split	Train-depleted representative fold selected from all Scaffold folds	moleculenet	Regression	qm8	fold_7	3643	21766	0.167371	16.7371	0	14041	0	0	3643	6498	0.560634	56.0634	0	1227	0	0	0.560634	56.0634	0	-0.167371	0.393263	-0.167371	3643	0.393263
Fig. 3a	Box/scatter: Overall, Train, Max eval	Scaffold Split	Train-depleted representative fold selected from all Scaffold folds	moleculenet	Regression	qm9	fold_1	13998	133798	0.10462	10.462	0	92984	0	0	13998	26106	0.536199	53.6199	0	14708	0	0	0.536199	53.6199	0	-0.10462	0.431578	-0.10462	13998	0.431578
Fig. 3a	Box/scatter: Overall, Train, Max eval	UMAP-based clustering split	Train-depleted representative fold selected from all UMAP folds	admet	Classification	ames	fold_5	1294	7653	0.169084	16.9084	0	6105	0	0	0	159	0	0	1294	1389	0.931605	93.1605	0.931605	93.1605	0	-0.169084	-0.169084	0.762521	1294	0.762521
Fig. 3a	Box/scatter: Overall, Train, Max eval	UMAP-based clustering split	Train-depleted representative fold selected from all UMAP folds	admet	Classification	avian_tox	fold_3	100	579	0.172712	17.2712	5	386	0.0129534	1.29534	40	105	0.380952	38.0952	55	88	0.625	62.5	0.625	62.5	0.075	-0.159758	0.208241	0.452288	95	0.452288
Fig. 3a	Box/scatter: Overall, Train, Max eval	UMAP-based clustering split	Train-depleted representative fold selected from all UMAP folds	admet	Classification	bee_tox	fold_5	36	182	0.197802	19.7802	1	103	0.00970874	0.970874	3	43	0.0697674	6.97674	32	36	0.888889	88.8889	0.888889	88.8889	0.0490831	-0.188093	-0.128035	0.691087	35	0.691087
Fig. 3a	Box/scatter: Overall, Train, Max eval	UMAP-based clustering split	Train-depleted representative fold selected from all UMAP folds	admet	Classification	biodegradation	fold_5	589	1660	0.354819	35.4819	285	1345	0.211896	21.1896	171	176	0.971591	97.1591	133	139	0.956835	95.6835	0.971591	97.1591	0.597194	-0.142923	0.616772	0.602015	304	0.616772
Fig. 3a	Box/scatter: Overall, Train, Max eval	UMAP-based clustering split	Train-depleted representative fold selected from all UMAP folds	admet	Classification	carcinogenicity	fold_3	349	1632	0.213848	21.3848	0	1040	0	0	0	234	0	0	349	358	0.97486	97.486	0.97486	97.486	0	-0.213848	-0.213848	0.761012	349	0.761012
Fig. 3a	Box/scatter: Overall, Train, Max eval	UMAP-based clustering split	Train-depleted representative fold selected from all UMAP folds	admet	Classification	crustacean	fold_4	192	666	0.288288	28.8288	2	330	0.00606061	0.606061	6	134	0.0447761	4.47761	184	202	0.910891	91.0891	0.910891	91.0891	0.0210227	-0.282228	-0.243512	0.622603	190	0.622603
Fig. 3a	Box/scatter: Overall, Train, Max eval	UMAP-based clustering split	Train-depleted representative fold selected from all UMAP folds	admet	Classification	cyp1a2_substrate	fold_2	30	366	0.0819672	8.19672	0	260	0	0	29	38	0.763158	76.3158	1	68	0.0147059	1.47059	0.763158	76.3158	0	-0.0819672	0.681191	-0.0672613	30	0.681191
Fig. 3a	Box/scatter: Overall, Train, Max eval	UMAP-based clustering split	Train-depleted representative fold selected from all UMAP folds	admet	Classification	eye_corrosion	fold_7	553	2298	0.240644	24.0644	0	1723	0	0	179	182	0.983516	98.3516	374	393	0.951654	95.1654	0.983516	98.3516	0	-0.240644	0.742872	0.71101	553	0.742872
Fig. 3a	Box/scatter: Overall, Train, Max eval	UMAP-based clustering split	Train-depleted representative fold selected from all UMAP folds	admet	Classification	eye_irritation	fold_9	986	5209	0.189288	18.9288	424	4331	0.0978989	9.78989	6	312	0.0192308	1.92308	556	566	0.982332	98.2332	0.982332	98.2332	0.517196	-0.0913889	-0.170057	0.793044	562	0.793044
Fig. 3a	Box/scatter: Overall, Train, Max eval	UMAP-based clustering split	Train-depleted representative fold selected from all UMAP folds	admet	Classification	h_ht	fold_2	236	2905	0.0812392	8.12392	2	2267	0.000882223	0.0882223	234	372	0.629032	62.9032	0	266	0	0	0.629032	62.9032	0.0108596	-0.080357	0.547793	-0.0812392	234	0.547793
Fig. 3a	Box/scatter: Overall, Train, Max eval	UMAP-based clustering split	Train-depleted representative fold selected from all UMAP folds	admet	Classification	micronucleus_tox	fold_3	233	641	0.363495	36.3495	59	385	0.153247	15.3247	1	81	0.0123457	1.23457	173	175	0.988571	98.8571	0.988571	98.8571	0.421593	-0.210248	-0.351149	0.625077	174	0.625077
Fig. 3a	Box/scatter: Overall, Train, Max eval	UMAP-based clustering split	Train-depleted representative fold selected from all UMAP folds	admet	Classification	nr_ar	fold_10	1778	7842	0.226728	22.6728	63	6004	0.010493	1.0493	899	984	0.913618	91.3618	816	854	0.955504	95.5504	0.955504	95.5504	0.0462802	-0.216235	0.68689	0.728776	1715	0.728776
Fig. 3a	Box/scatter: Overall, Train, Max eval	UMAP-based clustering split	Train-depleted representative fold selected from all UMAP folds	admet	Classification	nr_ar_lbd	fold_9	1648	6998	0.235496	23.5496	819	5641	0.145187	14.5187	2	499	0.00400802	0.400802	827	858	0.963869	96.3869	0.963869	96.3869	0.616516	-0.0903088	-0.231488	0.728374	829	0.728374
Fig. 3a	Box/scatter: Overall, Train, Max eval	UMAP-based clustering split	Train-depleted representative fold selected from all UMAP folds	admet	Classification	nr_aromatase	fold_3	1538	6027	0.255185	25.5185	742	4678	0.158615	15.8615	770	831	0.926594	92.6594	26	518	0.0501931	5.01931	0.926594	92.6594	0.621568	-0.0965702	0.671409	-0.204992	796	0.671409
Fig. 3a	Box/scatter: Overall, Train, Max eval	UMAP-based clustering split	Train-depleted representative fold selected from all UMAP folds	admet	Classification	nr_er_lbd	fold_9	1659	7218	0.229842	22.9842	701	5648	0.124115	12.4115	48	593	0.0809444	8.09444	910	977	0.931423	93.1423	0.931423	93.1423	0.54	-0.105727	-0.148898	0.701581	958	0.701581
Fig. 3a	Box/scatter: Overall, Train, Max eval	UMAP-based clustering split	Train-depleted representative fold selected from all UMAP folds	admet	Classification	nr_gr	fold_7	1423	6046	0.235362	23.5362	367	4648	0.0789587	7.89587	1056	1160	0.910345	91.0345	0	238	0	0	0.910345	91.0345	0.335477	-0.156404	0.674983	-0.235362	1056	0.674983
Fig. 3a	Box/scatter: Overall, Train, Max eval	UMAP-based clustering split	Train-depleted representative fold selected from all UMAP folds	admet	Classification	nr_ppar_gamma	fold_7	1650	6714	0.245755	24.5755	669	5291	0.126441	12.6441	981	1067	0.9194	91.94	0	356	0	0	0.9194	91.94	0.5145	-0.119314	0.673645	-0.245755	981	0.673645
Fig. 3a	Box/scatter: Overall, Train, Max eval	UMAP-based clustering split	Train-depleted representative fold selected from all UMAP folds	admet	Classification	nr_tr	fold_1	1382	5364	0.257644	25.7644	666	4173	0.159597	15.9597	0	430	0	0	716	761	0.940867	94.0867	0.940867	94.0867	0.61945	-0.0980461	-0.257644	0.683224	716	0.683224
Fig. 3a	Box/scatter: Overall, Train, Max eval	UMAP-based clustering split	Train-depleted representative fold selected from all UMAP folds	admet	Classification	respiratory_tox	fold_3	639	3849	0.166017	16.6017	0	2605	0	0	635	729	0.871056	87.1056	4	515	0.00776699	0.776699	0.871056	87.1056	0	-0.166017	0.705039	-0.15825	639	0.705039
Fig. 3a	Box/scatter: Overall, Train, Max eval	UMAP-based clustering split	Train-depleted representative fold selected from all UMAP folds	admet	Classification	skin_sens	fold_1	145	541	0.268022	26.8022	0	387	0	0	64	71	0.901408	90.1408	81	83	0.975904	97.5904	0.975904	97.5904	0	-0.268022	0.633386	0.707881	145	0.707881
Fig. 3a	Box/scatter: Overall, Train, Max eval	UMAP-based clustering split	Train-depleted representative fold selected from all UMAP folds	admet	Classification	sr_are	fold_10	1446	5727	0.252488	25.2488	657	4607	0.142609	14.2609	789	885	0.891525	89.1525	0	235	0	0	0.891525	89.1525	0.564815	-0.109879	0.639037	-0.252488	789	0.639037
Fig. 3a	Box/scatter: Overall, Train, Max eval	UMAP-based clustering split	Train-depleted representative fold selected from all UMAP folds	admet	Classification	sr_atad5	fold_10	1692	7307	0.231559	23.1559	660	5776	0.114266	11.4266	1032	1170	0.882051	88.2051	0	361	0	0	0.882051	88.2051	0.493464	-0.117293	0.650493	-0.231559	1032	0.650493
Fig. 3a	Box/scatter: Overall, Train, Max eval	UMAP-based clustering split	Train-depleted representative fold selected from all UMAP folds	admet	Classification	sr_hse	fold_3	1540	6395	0.240813	24.0813	818	4887	0.167383	16.7383	718	749	0.958611	95.8611	4	759	0.00527009	0.527009	0.958611	95.8611	0.695074	-0.0734303	0.717798	-0.235543	722	0.717798
Fig. 3a	Box/scatter: Overall, Train, Max eval	UMAP-based clustering split	Train-depleted representative fold selected from all UMAP folds	admet	Classification	sr_mmp	fold_3	1588	6416	0.247506	24.7506	11	4719	0.002331	0.2331	770	857	0.898483	89.8483	807	840	0.960714	96.0714	0.960714	96.0714	0.00941795	-0.245175	0.650977	0.713208	1577	0.713208
Fig. 3a	Box/scatter: Overall, Train, Max eval	UMAP-based clustering split	Train-depleted representative fold selected from all UMAP folds	admet	Classification	sr_p53	fold_7	1768	7466	0.236807	23.6807	732	5931	0.123419	12.3419	1034	1154	0.896014	89.6014	2	381	0.00524934	0.524934	0.896014	89.6014	0.521181	-0.113388	0.659207	-0.231558	1036	0.659207
Fig. 3a	Box/scatter: Overall, Train, Max eval	UMAP-based clustering split	Train-depleted representative fold selected from all UMAP folds	admet	Regression	bbb_cns	fold_1	23	153	0.150327	15.0327	0	92	0	0	23	28	0.821429	82.1429	0	33	0	0	0.821429	82.1429	0	-0.150327	0.671102	-0.150327	23	0.671102
Fig. 3a	Box/scatter: Overall, Train, Max eval	UMAP-based clustering split	Train-depleted representative fold selected from all UMAP folds	admet	Regression	bioconcF	fold_4	115	676	0.170118	17.0118	2	413	0.00484262	0.484262	22	122	0.180328	18.0328	91	141	0.64539	64.539	0.64539	64.539	0.0284662	-0.165276	0.0102095	0.475272	113	0.475272
Fig. 3a	Box/scatter: Overall, Train, Max eval	UMAP-based clustering split	Train-depleted representative fold selected from all UMAP folds	admet	Regression	bp	fold_5	2652	5402	0.490929	49.0929	1267	4008	0.316118	31.6118	493	494	0.997976	99.7976	892	900	0.991111	99.1111	0.997976	99.7976	0.643917	-0.174812	0.507046	0.500182	1385	0.507046
Fig. 3a	Box/scatter: Overall, Train, Max eval	UMAP-based clustering split	Train-depleted representative fold selected from all UMAP folds	admet	Regression	fm_reg	fold_3	295	867	0.340254	34.0254	6	488	0.0122951	1.22951	3	88	0.0340909	3.40909	286	291	0.982818	98.2818	0.982818	98.2818	0.036135	-0.327959	-0.306163	0.642564	289	0.642564
Fig. 3a	Box/scatter: Overall, Train, Max eval	UMAP-based clustering split	Train-depleted representative fold selected from all UMAP folds	admet	Regression	lc50dm	fold_1	102	346	0.294798	29.4798	4	246	0.0162602	1.62602	75	75	1	100	23	25	0.92	92	1	100	0.055157	-0.278538	0.705202	0.625202	98	0.705202
Fig. 3a	Box/scatter: Overall, Train, Max eval	UMAP-based clustering split	Train-depleted representative fold selected from all UMAP folds	admet	Regression	logp	fold_6	1223	14848	0.082368	8.2368	43	10937	0.00393161	0.393161	1177	2039	0.577244	57.7244	3	1872	0.00160256	0.160256	0.577244	57.7244	0.0477322	-0.0784364	0.494876	-0.0807654	1180	0.494876
Fig. 3a	Box/scatter: Overall, Train, Max eval	UMAP-based clustering split	Train-depleted representative fold selected from all UMAP folds	admet	Regression	logs	fold_1	2537	9961	0.254693	25.4693	837	8057	0.103885	10.3885	712	888	0.801802	80.1802	988	1016	0.972441	97.2441	0.972441	97.2441	0.407882	-0.150808	0.547108	0.717748	1700	0.717748
Fig. 3a	Box/scatter: Overall, Train, Max eval	UMAP-based clustering split	Train-depleted representative fold selected from all UMAP folds	admet	Regression	logvp	fold_3	1226	2692	0.455423	45.5423	250	1621	0.154226	15.4226	501	516	0.97093	97.093	475	555	0.855856	85.5856	0.97093	97.093	0.338643	-0.301198	0.515507	0.400432	976	0.515507
Fig. 3a	Box/scatter: Overall, Train, Max eval	UMAP-based clustering split	Train-depleted representative fold selected from all UMAP folds	admet	Regression	mp	fold_2	2125	8548	0.248596	24.8596	767	7146	0.107333	10.7333	444	455	0.975824	97.5824	914	947	0.965153	96.5153	0.975824	97.5824	0.431756	-0.141263	0.727228	0.716557	1358	0.727228
Fig. 3a	Box/scatter: Overall, Train, Max eval	UMAP-based clustering split	Train-depleted representative fold selected from all UMAP folds	admet	Regression	pka	fold_4	506	3195	0.158372	15.8372	7	2467	0.00283745	0.283745	499	518	0.96332	96.332	0	210	0	0	0.96332	96.332	0.0179163	-0.155535	0.804948	-0.158372	499	0.804948
Fig. 3a	Box/scatter: Overall, Train, Max eval	UMAP-based clustering split	Train-depleted representative fold selected from all UMAP folds	admet	Regression	pkb	fold_2	591	3662	0.161387	16.1387	259	3032	0.0854222	8.54222	0	291	0	0	332	339	0.979351	97.9351	0.979351	97.9351	0.529299	-0.0759651	-0.161387	0.817964	332	0.817964
Fig. 3a	Box/scatter: Overall, Train, Max eval	UMAP-based clustering split	Train-depleted representative fold selected from all UMAP folds	admet	Regression	pyriformis_reg	fold_1	751	1745	0.430372	43.0372	151	1140	0.132456	13.2456	312	315	0.990476	99.0476	288	290	0.993103	99.3103	0.993103	99.3103	0.307771	-0.297916	0.560104	0.562731	600	0.562731
Fig. 3a	Box/scatter: Overall, Train, Max eval	UMAP-based clustering split	Train-depleted representative fold selected from all UMAP folds	admet	Regression	rat_acute_reg	fold_7	2283	10130	0.22537	22.537	49	7194	0.00681123	0.681123	1894	2052	0.923002	92.3002	340	884	0.384615	38.4615	0.923002	92.3002	0.0302224	-0.218559	0.697632	0.159245	2234	0.697632
Fig. 3a	Box/scatter: Overall, Train, Max eval	UMAP-based clustering split	Train-depleted representative fold selected from all UMAP folds	admet	Regression	rat_chronic	fold_1	56	380	0.147368	14.7368	26	243	0.106996	10.6996	30	83	0.361446	36.1446	0	54	0	0	0.361446	36.1446	0.726044	-0.0403725	0.214077	-0.147368	30	0.214077
Fig. 3a	Box/scatter: Overall, Train, Max eval	UMAP-based clustering split	Train-depleted representative fold selected from all UMAP folds	admet	Regression	skin_permeability	fold_5	74	186	0.397849	39.7849	32	116	0.275862	27.5862	41	41	1	100	1	29	0.0344828	3.44828	1	100	0.693383	-0.121987	0.602151	-0.363367	42	0.602151
Fig. 3a	Box/scatter: Overall, Train, Max eval	UMAP-based clustering split	Train-depleted representative fold selected from all UMAP folds	moleculenet	Classification	clintox	fold_2	129	1459	0.0884167	8.84167	23	1044	0.0220307	2.20307	106	216	0.490741	49.0741	0	199	0	0	0.490741	49.0741	0.249168	-0.0663861	0.402324	-0.0884167	106	0.402324
Fig. 3a	Box/scatter: Overall, Train, Max eval	UMAP-based clustering split	Train-depleted representative fold selected from all UMAP folds	moleculenet	Classification	sider	fold_7	154	1427	0.107919	10.7919	39	1207	0.0323115	3.23115	3	77	0.038961	3.8961	112	143	0.783217	78.3217	0.783217	78.3217	0.299406	-0.0756072	-0.0689577	0.675298	115	0.675298
Fig. 3a	Box/scatter: Overall, Train, Max eval	UMAP-based clustering split	Train-depleted representative fold selected from all UMAP folds	moleculenet	Classification	tox21	fold_7	1775	7823	0.226895	22.6895	498	5989	0.0831524	8.31524	1275	1398	0.912017	91.2017	2	436	0.00458716	0.458716	0.912017	91.2017	0.36648	-0.143743	0.685122	-0.222308	1277	0.685122
Fig. 3a	Box/scatter: Overall, Train, Max eval	UMAP-based clustering split	Train-depleted representative fold selected from all UMAP folds	moleculenet	Classification	toxcast	fold_3	1956	8577	0.228052	22.8052	551	6969	0.0790644	7.90644	20	182	0.10989	10.989	1385	1426	0.971248	97.1248	0.971248	97.1248	0.346695	-0.148987	-0.118162	0.743196	1405	0.743196
Fig. 3a	Box/scatter: Overall, Train, Max eval	UMAP-based clustering split	Train-depleted representative fold selected from all UMAP folds	moleculenet	Regression	esol	fold_3	316	1117	0.282901	28.2901	9	781	0.0115237	1.15237	180	185	0.972973	97.2973	127	151	0.84106	84.106	0.972973	97.2973	0.040734	-0.271377	0.690072	0.558159	307	0.690072
Fig. 3a	Box/scatter: Overall, Train, Max eval	UMAP-based clustering split	Train-depleted representative fold selected from all UMAP folds	moleculenet	Regression	qm7	fold_2	3035	6832	0.444233	44.4233	1226	5016	0.244418	24.4418	954	954	1	100	855	862	0.991879	99.1879	1	100	0.550202	-0.199815	0.555767	0.547646	1809	0.555767
Fig. 3a	Box/scatter: Overall, Train, Max eval	UMAP-based clustering split	Train-depleted representative fold selected from all UMAP folds	moleculenet	Regression	qm8	fold_2	3643	21766	0.167371	16.7371	1528	18698	0.08172	8.172	2115	2244	0.942513	94.2513	0	824	0	0	0.942513	94.2513	0.488256	-0.0856512	0.775142	-0.167371	2115	0.775142
Fig. 3a	Box/scatter: Overall, Train, Max eval	UMAP-based clustering split	Train-depleted representative fold selected from all UMAP folds	moleculenet	Regression	qm9	fold_7	6376	60000	0.106267	10.6267	1	50124	1.99505e-05	0.00199505	6375	7155	0.890985	89.0985	0	2721	0	0	0.890985	89.0985	0.00018774	-0.106247	0.784719	-0.106267	6375	0.784719
Fig. 3b	Top box/scatter and bottom Overall-vs-Train scatter	DataSAIL	Single split	admet	Classification	ames	single_split	1294	7653	0.169084	16.9084	200	6196	0.0322789	3.22789	697	730	0.954795	95.4795	397	727	0.54608	54.608	0.954795	95.4795	0.190904	-0.136805	0.785711	0.376996	1094	0.785711
Fig. 3b	Top box/scatter and bottom Overall-vs-Train scatter	DataSAIL	Single split	admet	Classification	avian_tox	single_split	100	579	0.172712	17.2712	37	359	0.103064	10.3064	37	110	0.336364	33.6364	26	110	0.236364	23.6364	0.336364	33.6364	0.596741	-0.0696475	0.163652	0.0636521	63	0.163652
Fig. 3b	Top box/scatter and bottom Overall-vs-Train scatter	DataSAIL	Single split	admet	Classification	bee_tox	single_split	36	182	0.197802	19.7802	6	114	0.0526316	5.26316	12	34	0.352941	35.2941	18	34	0.529412	52.9412	0.529412	52.9412	0.266082	-0.145171	0.155139	0.33161	30	0.33161
Fig. 3b	Top box/scatter and bottom Overall-vs-Train scatter	DataSAIL	Single split	admet	Classification	biodegradation	single_split	589	1660	0.354819	35.4819	290	1208	0.240066	24.0066	219	227	0.964758	96.4758	80	225	0.355556	35.5556	0.964758	96.4758	0.676587	-0.114753	0.609938	0.000736278	299	0.609938
Fig. 3b	Top box/scatter and bottom Overall-vs-Train scatter	DataSAIL	Single split	admet	Classification	carcinogenicity	single_split	349	1632	0.213848	21.3848	121	1189	0.101766	10.1766	13	222	0.0585586	5.85586	215	221	0.972851	97.2851	0.972851	97.2851	0.475881	-0.112082	-0.155289	0.759003	228	0.759003
Fig. 3b	Top box/scatter and bottom Overall-vs-Train scatter	DataSAIL	Single split	admet	Classification	crustacean	single_split	192	666	0.288288	28.8288	35	411	0.0851582	8.51582	112	128	0.875	87.5	45	127	0.354331	35.4331	0.875	87.5	0.295392	-0.20313	0.586712	0.0660424	157	0.586712
Fig. 3b	Top box/scatter and bottom Overall-vs-Train scatter	DataSAIL	Single split	admet	Classification	cyp1a2_substrate	single_split	30	366	0.0819672	8.19672	5	228	0.0219298	2.19298	6	69	0.0869565	8.69565	19	69	0.275362	27.5362	0.275362	27.5362	0.267544	-0.0600374	0.00498931	0.193395	25	0.193395
Fig. 3b	Top box/scatter and bottom Overall-vs-Train scatter	DataSAIL	Single split	admet	Classification	eye_corrosion	single_split	553	2298	0.240644	24.0644	182	1648	0.110437	11.0437	251	339	0.740413	74.0413	120	311	0.385852	38.5852	0.740413	74.0413	0.458922	-0.130207	0.499769	0.145208	371	0.499769
Fig. 3b	Top box/scatter and bottom Overall-vs-Train scatter	DataSAIL	Single split	admet	Classification	eye_irritation	single_split	986	5209	0.189288	18.9288	157	4221	0.037195	3.7195	436	494	0.882591	88.2591	393	494	0.795547	79.5547	0.882591	88.2591	0.1965	-0.152093	0.693303	0.606259	829	0.693303
Fig. 3b	Top box/scatter and bottom Overall-vs-Train scatter	DataSAIL	Single split	admet	Classification	h_ht	single_split	236	2905	0.0812392	8.12392	77	2115	0.0364066	3.64066	151	395	0.382278	38.2278	8	395	0.0202532	2.02532	0.382278	38.2278	0.448141	-0.0448326	0.301039	-0.0609861	159	0.301039
Fig. 3b	Top box/scatter and bottom Overall-vs-Train scatter	DataSAIL	Single split	admet	Classification	micronucleus_tox	single_split	233	641	0.363495	36.3495	181	396	0.457071	45.7071	33	124	0.266129	26.6129	19	121	0.157025	15.7025	0.266129	26.6129	1.25743	0.0935762	-0.0973655	-0.20647	52	0.20647
Fig. 3b	Top box/scatter and bottom Overall-vs-Train scatter	DataSAIL	Single split	admet	Classification	nr_ahr	single_split	1733	7183	0.241264	24.1264	691	5819	0.118749	11.8749	604	682	0.88563	88.563	438	682	0.642229	64.2229	0.88563	88.563	0.492195	-0.122515	0.644366	0.400965	1042	0.644366
Fig. 3b	Top box/scatter and bottom Overall-vs-Train scatter	DataSAIL	Single split	admet	Classification	nr_ar	single_split	1778	7842	0.226728	22.6728	915	6354	0.144004	14.4004	660	744	0.887097	88.7097	203	744	0.272849	27.2849	0.887097	88.7097	0.635139	-0.0827241	0.660369	0.0461216	863	0.660369
Fig. 3b	Top box/scatter and bottom Overall-vs-Train scatter	DataSAIL	Single split	admet	Classification	nr_ar_lbd	single_split	1648	6998	0.235496	23.5496	1052	5670	0.185538	18.5538	568	664	0.855422	85.5422	28	664	0.0421687	4.21687	0.855422	85.5422	0.787861	-0.0499579	0.619926	-0.193327	596	0.619926
Fig. 3b	Top box/scatter and bottom Overall-vs-Train scatter	DataSAIL	Single split	admet	Classification	nr_aromatase	single_split	1538	6027	0.255185	25.5185	953	4883	0.195167	19.5167	87	572	0.152098	15.2098	498	572	0.870629	87.0629	0.870629	87.0629	0.764806	-0.0600181	-0.103087	0.615444	585	0.615444
Fig. 3b	Top box/scatter and bottom Overall-vs-Train scatter	DataSAIL	Single split	admet	Classification	nr_er	single_split	1637	6661	0.245759	24.5759	990	5397	0.183435	18.3435	522	632	0.825949	82.5949	125	632	0.197785	19.7785	0.825949	82.5949	0.746403	-0.0623237	0.58019	-0.0479741	647	0.58019
Fig. 3b	Top box/scatter and bottom Overall-vs-Train scatter	DataSAIL	Single split	admet	Classification	nr_er_lbd	single_split	1659	7218	0.229842	22.9842	1069	5848	0.182798	18.2798	24	685	0.0350365	3.50365	566	685	0.826277	82.6277	0.826277	82.6277	0.795318	-0.0470445	-0.194806	0.596435	590	0.596435
Fig. 3b	Top box/scatter and bottom Overall-vs-Train scatter	DataSAIL	Single split	admet	Classification	nr_gr	single_split	1423	6046	0.235362	23.5362	850	4897	0.173576	17.3576	455	574	0.792683	79.2683	118	575	0.205217	20.5217	0.792683	79.2683	0.737483	-0.0617866	0.557321	-0.0301448	573	0.557321
Fig. 3b	Top box/scatter and bottom Overall-vs-Train scatter	DataSAIL	Single split	admet	Classification	nr_ppar_gamma	single_split	1650	6714	0.245755	24.5755	1156	5440	0.2125	21.25	491	637	0.770801	77.0801	3	637	0.00470958	0.470958	0.770801	77.0801	0.864682	-0.0332551	0.525045	-0.241046	494	0.525045
Fig. 3b	Top box/scatter and bottom Overall-vs-Train scatter	DataSAIL	Single split	admet	Classification	nr_tr	single_split	1382	5364	0.257644	25.7644	916	4346	0.210769	21.0769	397	509	0.779961	77.9961	69	509	0.13556	13.556	0.779961	77.9961	0.818062	-0.046875	0.522317	-0.122084	466	0.522317
Fig. 3b	Top box/scatter and bottom Overall-vs-Train scatter	DataSAIL	Single split	admet	Classification	respiratory_tox	single_split	639	3849	0.166017	16.6017	94	3119	0.0301379	3.01379	303	365	0.830137	83.0137	242	365	0.663014	66.3014	0.830137	83.0137	0.181535	-0.135879	0.66412	0.496997	545	0.66412
Fig. 3b	Top box/scatter and bottom Overall-vs-Train scatter	DataSAIL	Single split	admet	Classification	skin_sens	single_split	145	541	0.268022	26.8022	56	337	0.166172	16.6172	66	102	0.647059	64.7059	23	102	0.22549	22.549	0.647059	64.7059	0.619994	-0.10185	0.379037	-0.042532	89	0.379037
Fig. 3b	Top box/scatter and bottom Overall-vs-Train scatter	DataSAIL	Single split	admet	Classification	sr_are	single_split	1446	5727	0.252488	25.2488	779	4638	0.16796	16.796	510	545	0.93578	93.578	157	544	0.288603	28.8603	0.93578	93.578	0.66522	-0.0845279	0.683292	0.0361147	667	0.683292
Fig. 3b	Top box/scatter and bottom Overall-vs-Train scatter	DataSAIL	Single split	admet	Classification	sr_atad5	single_split	1692	7307	0.231559	23.1559	1133	5919	0.191417	19.1417	75	694	0.108069	10.8069	484	694	0.697406	69.7406	0.697406	69.7406	0.826647	-0.0401413	-0.12349	0.465848	559	0.465848
Fig. 3b	Top box/scatter and bottom Overall-vs-Train scatter	DataSAIL	Single split	admet	Classification	sr_hse	single_split	1540	6395	0.240813	24.0813	953	5181	0.183941	18.3941	558	607	0.919275	91.9275	29	607	0.0477759	4.77759	0.919275	91.9275	0.763834	-0.0568718	0.678462	-0.193037	587	0.678462
Fig. 3b	Top box/scatter and bottom Overall-vs-Train scatter	DataSAIL	Single split	admet	Classification	sr_mmp	single_split	1588	6416	0.247506	24.7506	779	5198	0.149865	14.9865	507	609	0.832512	83.2512	302	609	0.495895	49.5895	0.832512	83.2512	0.605501	-0.0976409	0.585006	0.248389	809	0.585006
Fig. 3b	Top box/scatter and bottom Overall-vs-Train scatter	DataSAIL	Single split	admet	Classification	sr_p53	single_split	1768	7466	0.236807	23.6807	1136	6048	0.187831	18.7831	614	709	0.866008	86.6008	18	709	0.0253879	2.53879	0.866008	86.6008	0.793181	-0.0489762	0.629202	-0.211419	632	0.629202
Fig. 3b	Top box/scatter and bottom Overall-vs-Train scatter	DataSAIL	Single split	admet	Regression	bbb_cns	single_split	23	153	0.150327	15.0327	10	95	0.105263	10.5263	8	29	0.275862	27.5862	5	29	0.172414	17.2414	0.275862	27.5862	0.700229	-0.0450636	0.125535	0.022087	13	0.125535
Fig. 3b	Top box/scatter and bottom Overall-vs-Train scatter	DataSAIL	Single split	admet	Regression	bioconcF	single_split	115	676	0.170118	17.0118	9	420	0.0214286	2.14286	1	128	0.0078125	0.78125	105	128	0.820312	82.0312	0.820312	82.0312	0.125963	-0.14869	-0.162306	0.650194	106	0.650194
Fig. 3b	Top box/scatter and bottom Overall-vs-Train scatter	DataSAIL	Single split	admet	Regression	bp	single_split	2652	5402	0.490929	49.0929	2184	4368	0.5	50	38	520	0.0730769	7.30769	430	514	0.836576	83.6576	0.836576	83.6576	1.01848	0.00907071	-0.417852	0.345647	468	0.417852
Fig. 3b	Top box/scatter and bottom Overall-vs-Train scatter	DataSAIL	Single split	admet	Regression	fm_reg	single_split	295	867	0.340254	34.0254	71	539	0.131725	13.1725	133	164	0.810976	81.0976	91	164	0.554878	55.4878	0.810976	81.0976	0.387139	-0.208528	0.470722	0.214624	224	0.470722
Fig. 3b	Top box/scatter and bottom Overall-vs-Train scatter	DataSAIL	Single split	admet	Regression	hydrationE	single_split	318	640	0.496875	49.6875	128	394	0.324873	32.4873	121	125	0.968	96.8	69	121	0.570248	57.0248	0.968	96.8	0.653833	-0.172002	0.471125	0.0733729	190	0.471125
Fig. 3b	Top box/scatter and bottom Overall-vs-Train scatter	DataSAIL	Single split	admet	Regression	lc50dm	single_split	102	346	0.294798	29.4798	15	215	0.0697674	6.97674	34	65	0.523077	52.3077	53	66	0.80303	80.303	0.80303	80.303	0.236662	-0.22503	0.228279	0.508233	87	0.508233
Fig. 3b	Top box/scatter and bottom Overall-vs-Train scatter	DataSAIL	Single split	admet	Regression	logp	single_split	1223	14848	0.082368	8.2368	594	11981	0.0495785	4.95785	529	1410	0.375177	37.5177	100	1457	0.0686342	6.86342	0.375177	37.5177	0.601915	-0.0327895	0.292809	-0.0137338	629	0.292809
Fig. 3b	Top box/scatter and bottom Overall-vs-Train scatter	DataSAIL	Single split	admet	Regression	logs	single_split	2537	9961	0.254693	25.4693	1727	8069	0.214029	21.4029	685	946	0.724101	72.4101	125	946	0.132135	13.2135	0.724101	72.4101	0.84034	-0.0406643	0.469408	-0.122558	810	0.469408
Fig. 3b	Top box/scatter and bottom Overall-vs-Train scatter	DataSAIL	Single split	admet	Regression	logvp	single_split	1226	2692	0.455423	45.5423	716	1962	0.364934	36.4934	357	365	0.978082	97.8082	153	365	0.419178	41.9178	0.978082	97.8082	0.801306	-0.0904897	0.522659	-0.0362454	510	0.522659
Fig. 3b	Top box/scatter and bottom Overall-vs-Train scatter	DataSAIL	Single split	admet	Regression	mp	single_split	2125	8548	0.248596	24.8596	1137	6924	0.164211	16.4211	782	812	0.963054	96.3054	206	812	0.253695	25.3695	0.963054	96.3054	0.660555	-0.0843847	0.714458	0.00509842	988	0.714458
Fig. 3b	Top box/scatter and bottom Overall-vs-Train scatter	DataSAIL	Single split	admet	Regression	pka	single_split	506	3195	0.158372	15.8372	217	2589	0.0838161	8.38161	210	303	0.693069	69.3069	79	303	0.260726	26.0726	0.693069	69.3069	0.529234	-0.0745563	0.534697	0.102354	289	0.534697
Fig. 3b	Top box/scatter and bottom Overall-vs-Train scatter	DataSAIL	Single split	admet	Regression	pkb	single_split	591	3662	0.161387	16.1387	82	2968	0.027628	2.7628	331	347	0.95389	95.389	178	347	0.512968	51.2968	0.95389	95.389	0.171191	-0.133759	0.792503	0.351581	509	0.792503
Fig. 3b	Top box/scatter and bottom Overall-vs-Train scatter	DataSAIL	Single split	admet	Regression	pyriformis_reg	single_split	751	1745	0.430372	43.0372	701	1273	0.550668	55.0668	0	236	0	0	50	236	0.211864	21.1864	0.211864	21.1864	1.27951	0.120295	-0.430372	-0.218508	50	0.430372
Fig. 3b	Top box/scatter and bottom Overall-vs-Train scatter	DataSAIL	Single split	admet	Regression	rat_acute_reg	single_split	2283	10130	0.22537	22.537	1917	8206	0.23361	23.361	214	962	0.222453	22.2453	152	962	0.158004	15.8004	0.222453	22.2453	1.03656	0.00823937	-0.00291697	-0.067366	366	0.067366
Fig. 3b	Top box/scatter and bottom Overall-vs-Train scatter	DataSAIL	Single split	admet	Regression	rat_chronic	single_split	56	380	0.147368	14.7368	31	236	0.131356	13.1356	21	72	0.291667	29.1667	4	72	0.0555556	5.55556	0.291667	29.1667	0.891344	-0.0160125	0.144298	-0.0918129	25	0.144298
Fig. 3b	Top box/scatter and bottom Overall-vs-Train scatter	DataSAIL	Single split	admet	Regression	skin_permeability	single_split	74	186	0.397849	39.7849	37	114	0.324561	32.4561	18	37	0.486486	48.6486	19	35	0.542857	54.2857	0.542857	54.2857	0.815789	-0.0732881	0.088637	0.145008	37	0.145008
Fig. 3b	Top box/scatter and bottom Overall-vs-Train scatter	DataSAIL	Single split	moleculenet	Classification	clintox	single_split	129	1459	0.0884167	8.84167	49	1060	0.0462264	4.62264	21	201	0.104478	10.4478	59	198	0.29798	29.798	0.29798	29.798	0.522824	-0.0421903	0.0160609	0.209563	80	0.209563
Fig. 3b	Top box/scatter and bottom Overall-vs-Train scatter	DataSAIL	Single split	moleculenet	Classification	sider	single_split	154	1427	0.107919	10.7919	56	1041	0.0537944	5.37944	31	193	0.160622	16.0622	67	193	0.34715	34.715	0.34715	34.715	0.498472	-0.0541243	0.0527031	0.239232	98	0.239232
Fig. 3b	Top box/scatter and bottom Overall-vs-Train scatter	DataSAIL	Single split	moleculenet	Classification	tox21	single_split	1775	7823	0.226895	22.6895	863	6337	0.136184	13.6184	632	743	0.850606	85.0606	280	743	0.376851	37.6851	0.850606	85.0606	0.600208	-0.0907107	0.623711	0.149956	912	0.623711
Fig. 3b	Top box/scatter and bottom Overall-vs-Train scatter	DataSAIL	Single split	moleculenet	Classification	toxcast	single_split	1956	8577	0.228052	22.8052	917	6948	0.13198	13.198	769	815	0.943558	94.3558	270	814	0.331695	33.1695	0.943558	94.3558	0.57873	-0.0960713	0.715507	0.103644	1039	0.715507
Fig. 3b	Top box/scatter and bottom Overall-vs-Train scatter	DataSAIL	Single split	moleculenet	Regression	esol	single_split	316	1117	0.282901	28.2901	55	814	0.0675676	6.75676	112	151	0.741722	74.1722	149	152	0.980263	98.0263	0.980263	98.0263	0.238839	-0.215333	0.458821	0.697363	261	0.697363
Fig. 3b	Top box/scatter and bottom Overall-vs-Train scatter	DataSAIL	Single split	moleculenet	Regression	freesolv	single_split	320	642	0.498442	49.8442	167	400	0.4175	41.75	102	121	0.842975	84.2975	51	121	0.421488	42.1488	0.842975	84.2975	0.837609	-0.0809424	0.344533	-0.0769548	153	0.344533
Fig. 3b	Top box/scatter and bottom Overall-vs-Train scatter	DataSAIL	Single split	moleculenet	Regression	qm7	single_split	3035	6832	0.444233	44.4233	3033	5523	0.549158	54.9158	1	656	0.00152439	0.152439	1	653	0.00153139	0.153139	0.00153139	0.153139	1.23619	0.104925	-0.442709	-0.442702	2	0.442709
Fig. 3b	Top box/scatter and bottom Overall-vs-Train scatter	DataSAIL	Single split	moleculenet	Regression	qm8	single_split	3643	21766	0.167371	16.7371	3419	17473	0.195673	19.5673	224	2127	0.105313	10.5313	0	2166	0	0	0.105313	10.5313	1.1691	0.0283022	-0.0620585	-0.167371	224	0.167371
Fig. 3b	Top box/scatter and bottom Overall-vs-Train scatter	DataSAIL	Single split	moleculenet	Regression	qm9	single_split	5298	50000	0.10596	10.596	2084	40402	0.0515816	5.15816	1501	4836	0.31038	31.038	1713	4762	0.359723	35.9723	0.359723	35.9723	0.486803	-0.0543784	0.20442	0.253763	3214	0.253763
Fig. 3b	Top box/scatter and bottom Overall-vs-Train scatter	LoHi	Single split	admet	Classification	biodegradation	single_split	528	1586	0.332913	33.2913	153	1158	0.132124	13.2124	190	214	0.88785	88.785	185	214	0.864486	86.4486	0.88785	88.785	0.396874	-0.200789	0.554937	0.531573	375	0.554937
Fig. 3b	Top box/scatter and bottom Overall-vs-Train scatter	LoHi	Single split	admet	Classification	carcinogenicity	single_split	349	1625	0.214769	21.4769	277	1161	0.238587	23.8587	33	232	0.142241	14.2241	39	232	0.168103	16.8103	0.168103	16.8103	1.1109	0.0238182	-0.0725279	-0.0466658	72	0.0725279
Fig. 3b	Top box/scatter and bottom Overall-vs-Train scatter	LoHi	Single split	admet	Classification	crustacean	single_split	192	654	0.293578	29.3578	150	396	0.378788	37.8788	19	129	0.147287	14.7287	23	129	0.178295	17.8295	0.178295	17.8295	1.29025	0.0852099	-0.146291	-0.115283	42	0.146291
Fig. 3b	Top box/scatter and bottom Overall-vs-Train scatter	LoHi	Single split	admet	Classification	eye_corrosion	single_split	553	2250	0.245778	24.5778	508	1616	0.314356	31.4356	22	317	0.0694006	6.94006	23	317	0.0725552	7.25552	0.0725552	7.25552	1.27903	0.0685787	-0.176377	-0.173223	45	0.176377
Fig. 3b	Top box/scatter and bottom Overall-vs-Train scatter	LoHi	Single split	admet	Classification	h_ht	single_split	235	2880	0.0815972	8.15972	179	2070	0.0864734	8.64734	19	405	0.0469136	4.69136	37	405	0.091358	9.1358	0.091358	9.1358	1.05976	0.00487621	-0.0346836	0.0097608	56	0.0346836
Fig. 3b	Top box/scatter and bottom Overall-vs-Train scatter	LoHi	Single split	admet	Classification	micronucleus_tox	single_split	227	634	0.358044	35.8044	91	382	0.23822	23.822	79	126	0.626984	62.6984	57	126	0.452381	45.2381	0.626984	62.6984	0.665337	-0.119824	0.26894	0.0943368	136	0.26894
Fig. 3b	Top box/scatter and bottom Overall-vs-Train scatter	LoHi	Single split	admet	Classification	nr_er	single_split	1615	6439	0.250815	25.0815	1462	5153	0.283718	28.3718	99	643	0.153966	15.3966	54	643	0.0839813	8.39813	0.153966	15.3966	1.13118	0.0329029	-0.0968496	-0.166834	153	0.166834
Fig. 3b	Top box/scatter and bottom Overall-vs-Train scatter	LoHi	Single split	admet	Classification	nr_er_lbd	single_split	1652	6928	0.238453	23.8453	1584	5551	0.285354	28.5354	24	689	0.0348331	3.48331	44	688	0.0639535	6.39535	0.0639535	6.39535	1.19669	0.0469013	-0.20362	-0.174499	68	0.20362
Fig. 3b	Top box/scatter and bottom Overall-vs-Train scatter	LoHi	Single split	admet	Classification	nr_gr	single_split	1410	5837	0.241562	24.1562	1259	4671	0.269535	26.9535	101	583	0.173242	17.3242	50	583	0.0857633	8.57633	0.173242	17.3242	1.1158	0.027973	-0.0683206	-0.155799	151	0.155799
Fig. 3b	Top box/scatter and bottom Overall-vs-Train scatter	LoHi	Single split	admet	Classification	respiratory_tox	single_split	625	3818	0.163698	16.3698	539	3059	0.176201	17.6201	42	380	0.110526	11.0526	44	379	0.116095	11.6095	0.116095	11.6095	1.07638	0.0125031	-0.053172	-0.0476033	86	0.053172
Fig. 3b	Top box/scatter and bottom Overall-vs-Train scatter	LoHi	Single split	admet	Classification	skin_sens	single_split	144	534	0.269663	26.9663	111	321	0.345794	34.5794	15	107	0.140187	14.0187	18	106	0.169811	16.9811	0.169811	16.9811	1.28232	0.0761315	-0.129476	-0.0998516	33	0.129476
Fig. 3b	Top box/scatter and bottom Overall-vs-Train scatter	LoHi	Single split	admet	Classification	sr_atad5	single_split	1670	6965	0.23977	23.977	1542	5577	0.276493	27.6493	99	694	0.142651	14.2651	29	694	0.0417867	4.17867	0.142651	14.2651	1.15316	0.0367225	-0.097119	-0.197984	128	0.197984
Fig. 3b	Top box/scatter and bottom Overall-vs-Train scatter	LoHi	Single split	admet	Classification	sr_hse	single_split	1534	6149	0.249471	24.9471	1456	4941	0.294677	29.4677	36	604	0.0596026	5.96026	42	604	0.0695364	6.95364	0.0695364	6.95364	1.18121	0.0452057	-0.189869	-0.179935	78	0.189869
Fig. 3b	Top box/scatter and bottom Overall-vs-Train scatter	LoHi	Single split	admet	Classification	sr_mmp	single_split	1580	6284	0.251432	25.1432	1459	5029	0.290117	29.0117	74	628	0.117834	11.7834	47	627	0.0749601	7.49601	0.117834	11.7834	1.15386	0.0386851	-0.133598	-0.176472	121	0.176472
Fig. 3b	Top box/scatter and bottom Overall-vs-Train scatter	LoHi	Single split	admet	Regression	bioconcF	single_split	115	633	0.181675	18.1675	82	384	0.213542	21.3542	16	125	0.128	12.8	17	124	0.137097	13.7097	0.137097	13.7097	1.17541	0.0318671	-0.0536746	-0.0445778	33	0.0536746
Fig. 3b	Top box/scatter and bottom Overall-vs-Train scatter	LoHi	Single split	admet	Regression	fm_reg	single_split	283	834	0.339329	33.9329	102	507	0.201183	20.1183	120	164	0.731707	73.1707	61	163	0.374233	37.4233	0.731707	73.1707	0.592887	-0.138145	0.392379	0.0349046	181	0.392379
Fig. 3b	Top box/scatter and bottom Overall-vs-Train scatter	LoHi	Single split	admet	Regression	hydrationE	single_split	305	626	0.48722	48.722	99	382	0.259162	25.9162	99	122	0.811475	81.1475	107	122	0.877049	87.7049	0.877049	87.7049	0.53192	-0.228058	0.324255	0.389829	206	0.389829
Fig. 3b	Top box/scatter and bottom Overall-vs-Train scatter	LoHi	Single split	admet	Regression	lc50dm	single_split	102	330	0.309091	30.9091	66	199	0.331658	33.1658	16	66	0.242424	24.2424	20	65	0.307692	30.7692	0.307692	30.7692	1.07301	0.0225674	-0.0666667	-0.0013986	36	0.0666667
Fig. 3b	Top box/scatter and bottom Overall-vs-Train scatter	LoHi	Single split	admet	Regression	pka	single_split	474	3118	0.152021	15.2021	214	2510	0.085259	8.5259	151	304	0.496711	49.6711	109	304	0.358553	35.8553	0.496711	49.6711	0.560839	-0.0667616	0.34469	0.206532	260	0.34469
Fig. 3b	Top box/scatter and bottom Overall-vs-Train scatter	LoHi	Single split	admet	Regression	pkb	single_split	559	3605	0.155062	15.5062	299	2892	0.103389	10.3389	152	354	0.429379	42.9379	108	359	0.300836	30.0836	0.429379	42.9379	0.666755	-0.0516738	0.274316	0.145773	260	0.274316
Fig. 3b	Top box/scatter and bottom Overall-vs-Train scatter	LoHi	Single split	moleculenet	Classification	clintox	single_split	129	1453	0.0887818	8.87818	96	1038	0.0924855	9.24855	18	208	0.0865385	8.65385	15	207	0.0724638	7.24638	0.0865385	8.65385	1.04172	0.00370372	-0.00224337	-0.0163181	33	0.0163181
Fig. 3b	Top box/scatter and bottom Overall-vs-Train scatter	LoHi	Single split	moleculenet	Regression	esol	single_split	316	1072	0.294776	29.4776	282	776	0.363402	36.3402	21	148	0.141892	14.1892	13	148	0.0878378	8.78378	0.141892	14.1892	1.23281	0.0686259	-0.152884	-0.206938	34	0.206938
Fig. 3b	Top box/scatter and bottom Overall-vs-Train scatter	LoHi	Single split	moleculenet	Regression	freesolv	single_split	320	619	0.516963	51.6963	282	382	0.73822	73.822	20	119	0.168067	16.8067	18	118	0.152542	15.2542	0.168067	16.8067	1.42799	0.221257	-0.348896	-0.36442	38	0.36442
Fig. 3b	Top box/scatter and bottom Overall-vs-Train scatter	LoHi	Single split	moleculenet	Regression	qm7	single_split	3015	6564	0.459324	45.9324	2984	5344	0.558383	55.8383	12	610	0.0196721	1.96721	19	610	0.0311475	3.11475	0.0311475	3.11475	1.21566	0.0990597	-0.439651	-0.428176	31	0.439651

## Sheet: Figure 4
Figure panel	Benchmark	Benchmark key	Dataset	Target	Model	Model key	Delta normPR vs ordinary median
Fig. 4a	ADMET	admet	ames	ames	ChemBERTa-3	chemberta3	-0.282363
Fig. 4a	ADMET	admet	ames	ames	D-MPNN	dmpnn	-0.23063
Fig. 4a	ADMET	admet	ames	ames	FCNN-FP	fcnn_fingerprint	-0.261524
Fig. 4a	ADMET	admet	ames	ames	FCNN-Feat	fcnn_character	-0.323331
Fig. 4a	ADMET	admet	ames	ames	MolCLR	molclr	-0.19823
Fig. 4a	ADMET	admet	ames	ames	XGB-FP	xgboost_fingerprint	-0.202311
Fig. 4a	ADMET	admet	ames	ames	XGB-Feat	xgboost_character	-0.267077
Fig. 4a	ADMET	admet	avian_tox	avian_tox	ChemBERTa-3	chemberta3	-0.0555707
Fig. 4a	ADMET	admet	avian_tox	avian_tox	D-MPNN	dmpnn	-0.0466077
Fig. 4a	ADMET	admet	avian_tox	avian_tox	FCNN-FP	fcnn_fingerprint	-0.246972
Fig. 4a	ADMET	admet	avian_tox	avian_tox	FCNN-Feat	fcnn_character	-0.0269069
Fig. 4a	ADMET	admet	avian_tox	avian_tox	MolCLR	molclr	-0.0313011
Fig. 4a	ADMET	admet	avian_tox	avian_tox	XGB-FP	xgboost_fingerprint	-0.219173
Fig. 4a	ADMET	admet	avian_tox	avian_tox	XGB-Feat	xgboost_character	0.0139282
Fig. 4a	ADMET	admet	bee_tox	bee_tox	ChemBERTa-3	chemberta3	-0.0643085
Fig. 4a	ADMET	admet	bee_tox	bee_tox	D-MPNN	dmpnn	-0.0356409
Fig. 4a	ADMET	admet	bee_tox	bee_tox	FCNN-FP	fcnn_fingerprint	0.0695691
Fig. 4a	ADMET	admet	bee_tox	bee_tox	FCNN-Feat	fcnn_character	0.252091
Fig. 4a	ADMET	admet	bee_tox	bee_tox	MolCLR	molclr	-0.114954
Fig. 4a	ADMET	admet	bee_tox	bee_tox	XGB-FP	xgboost_fingerprint	0.103509
Fig. 4a	ADMET	admet	bee_tox	bee_tox	XGB-Feat	xgboost_character	0.0139472
Fig. 4a	ADMET	admet	biodegradation	biodegradation	ChemBERTa-3	chemberta3	0.130547
Fig. 4a	ADMET	admet	biodegradation	biodegradation	D-MPNN	dmpnn	0.0371257
Fig. 4a	ADMET	admet	biodegradation	biodegradation	FCNN-FP	fcnn_fingerprint	0.286703
Fig. 4a	ADMET	admet	biodegradation	biodegradation	FCNN-Feat	fcnn_character	0.046495
Fig. 4a	ADMET	admet	biodegradation	biodegradation	MolCLR	molclr	-0.0350974
Fig. 4a	ADMET	admet	biodegradation	biodegradation	XGB-FP	xgboost_fingerprint	0.178039
Fig. 4a	ADMET	admet	biodegradation	biodegradation	XGB-Feat	xgboost_character	-0.12111
Fig. 4a	ADMET	admet	carcinogenicity	carcinogenicity	ChemBERTa-3	chemberta3	-0.0353694
Fig. 4a	ADMET	admet	carcinogenicity	carcinogenicity	D-MPNN	dmpnn	-0.0412668
Fig. 4a	ADMET	admet	carcinogenicity	carcinogenicity	FCNN-FP	fcnn_fingerprint	-0.000452732
Fig. 4a	ADMET	admet	carcinogenicity	carcinogenicity	FCNN-Feat	fcnn_character	-0.0907608
Fig. 4a	ADMET	admet	carcinogenicity	carcinogenicity	MolCLR	molclr	-0.068874
Fig. 4a	ADMET	admet	carcinogenicity	carcinogenicity	XGB-FP	xgboost_fingerprint	-0.0169805
Fig. 4a	ADMET	admet	carcinogenicity	carcinogenicity	XGB-Feat	xgboost_character	-0.125343
Fig. 4a	ADMET	admet	crustacean	crustacean	ChemBERTa-3	chemberta3	-0.245403
Fig. 4a	ADMET	admet	crustacean	crustacean	D-MPNN	dmpnn	-0.391924
Fig. 4a	ADMET	admet	crustacean	crustacean	FCNN-FP	fcnn_fingerprint	-0.15725
Fig. 4a	ADMET	admet	crustacean	crustacean	FCNN-Feat	fcnn_character	-0.257205
Fig. 4a	ADMET	admet	crustacean	crustacean	MolCLR	molclr	-0.334442
Fig. 4a	ADMET	admet	crustacean	crustacean	XGB-FP	xgboost_fingerprint	-0.167575
Fig. 4a	ADMET	admet	crustacean	crustacean	XGB-Feat	xgboost_character	-0.199014
Fig. 4a	ADMET	admet	eye_corrosion	eye_corrosion	ChemBERTa-3	chemberta3	-0.468578
Fig. 4a	ADMET	admet	eye_corrosion	eye_corrosion	D-MPNN	dmpnn	-0.380867
Fig. 4a	ADMET	admet	eye_corrosion	eye_corrosion	FCNN-FP	fcnn_fingerprint	-0.422808
Fig. 4a	ADMET	admet	eye_corrosion	eye_corrosion	FCNN-Feat	fcnn_character	-0.299868
Fig. 4a	ADMET	admet	eye_corrosion	eye_corrosion	MolCLR	molclr	-0.683068
Fig. 4a	ADMET	admet	eye_corrosion	eye_corrosion	XGB-FP	xgboost_fingerprint	-0.52333
Fig. 4a	ADMET	admet	eye_corrosion	eye_corrosion	XGB-Feat	xgboost_character	-0.273908
Fig. 4a	ADMET	admet	eye_irritation	eye_irritation	ChemBERTa-3	chemberta3	-0.513805
Fig. 4a	ADMET	admet	eye_irritation	eye_irritation	D-MPNN	dmpnn	-0.454629
Fig. 4a	ADMET	admet	eye_irritation	eye_irritation	FCNN-FP	fcnn_fingerprint	-0.385043
Fig. 4a	ADMET	admet	eye_irritation	eye_irritation	FCNN-Feat	fcnn_character	-0.414136
Fig. 4a	ADMET	admet	eye_irritation	eye_irritation	MolCLR	molclr	-0.512369
Fig. 4a	ADMET	admet	eye_irritation	eye_irritation	XGB-FP	xgboost_fingerprint	-0.62248
Fig. 4a	ADMET	admet	eye_irritation	eye_irritation	XGB-Feat	xgboost_character	-0.423133
Fig. 4a	ADMET	admet	h_ht	h_ht	ChemBERTa-3	chemberta3	-0.302019
Fig. 4a	ADMET	admet	h_ht	h_ht	D-MPNN	dmpnn	-0.376472
Fig. 4a	ADMET	admet	h_ht	h_ht	FCNN-FP	fcnn_fingerprint	-0.331994
Fig. 4a	ADMET	admet	h_ht	h_ht	FCNN-Feat	fcnn_character	-0.362902
Fig. 4a	ADMET	admet	h_ht	h_ht	MolCLR	molclr	-0.157576
Fig. 4a	ADMET	admet	h_ht	h_ht	XGB-FP	xgboost_fingerprint	-0.337975
Fig. 4a	ADMET	admet	h_ht	h_ht	XGB-Feat	xgboost_character	-0.40325
Fig. 4a	ADMET	admet	micronucleus_tox	micronucleus_tox	ChemBERTa-3	chemberta3	-0.0484121
Fig. 4a	ADMET	admet	micronucleus_tox	micronucleus_tox	D-MPNN	dmpnn	-0.238702
Fig. 4a	ADMET	admet	micronucleus_tox	micronucleus_tox	FCNN-FP	fcnn_fingerprint	-0.25627
Fig. 4a	ADMET	admet	micronucleus_tox	micronucleus_tox	FCNN-Feat	fcnn_character	-0.226492
Fig. 4a	ADMET	admet	micronucleus_tox	micronucleus_tox	MolCLR	molclr	-0.203357
Fig. 4a	ADMET	admet	micronucleus_tox	micronucleus_tox	XGB-FP	xgboost_fingerprint	-0.467708
Fig. 4a	ADMET	admet	micronucleus_tox	micronucleus_tox	XGB-Feat	xgboost_character	-0.374508
Fig. 4a	ADMET	admet	nr_ahr	nr_ahr	ChemBERTa-3	chemberta3	-0.34506
Fig. 4a	ADMET	admet	nr_ahr	nr_ahr	D-MPNN	dmpnn	-0.355358
Fig. 4a	ADMET	admet	nr_ahr	nr_ahr	FCNN-FP	fcnn_fingerprint	-0.345465
Fig. 4a	ADMET	admet	nr_ahr	nr_ahr	FCNN-Feat	fcnn_character	-0.374399
Fig. 4a	ADMET	admet	nr_ahr	nr_ahr	MolCLR	molclr	-0.41111
Fig. 4a	ADMET	admet	nr_ahr	nr_ahr	XGB-FP	xgboost_fingerprint	-0.385887
Fig. 4a	ADMET	admet	nr_ahr	nr_ahr	XGB-Feat	xgboost_character	-0.35141
Fig. 4a	ADMET	admet	nr_ar	nr_ar	ChemBERTa-3	chemberta3	-0.476552
Fig. 4a	ADMET	admet	nr_ar	nr_ar	D-MPNN	dmpnn	-0.518834
Fig. 4a	ADMET	admet	nr_ar	nr_ar	FCNN-FP	fcnn_fingerprint	-0.51704
Fig. 4a	ADMET	admet	nr_ar	nr_ar	FCNN-Feat	fcnn_character	-0.486771
Fig. 4a	ADMET	admet	nr_ar	nr_ar	MolCLR	molclr	-0.44624
Fig. 4a	ADMET	admet	nr_ar	nr_ar	XGB-FP	xgboost_fingerprint	-0.514002
Fig. 4a	ADMET	admet	nr_ar	nr_ar	XGB-Feat	xgboost_character	-0.529243
Fig. 4a	ADMET	admet	nr_ar_lbd	nr_ar_lbd	ChemBERTa-3	chemberta3	-0.483912
Fig. 4a	ADMET	admet	nr_ar_lbd	nr_ar_lbd	D-MPNN	dmpnn	-0.435119
Fig. 4a	ADMET	admet	nr_ar_lbd	nr_ar_lbd	FCNN-FP	fcnn_fingerprint	-0.600655
Fig. 4a	ADMET	admet	nr_ar_lbd	nr_ar_lbd	FCNN-Feat	fcnn_character	-0.342379
Fig. 4a	ADMET	admet	nr_ar_lbd	nr_ar_lbd	MolCLR	molclr	-0.356432
Fig. 4a	ADMET	admet	nr_ar_lbd	nr_ar_lbd	XGB-FP	xgboost_fingerprint	-0.590892
Fig. 4a	ADMET	admet	nr_ar_lbd	nr_ar_lbd	XGB-Feat	xgboost_character	-0.483601
Fig. 4a	ADMET	admet	nr_aromatase	nr_aromatase	ChemBERTa-3	chemberta3	-0.1726
Fig. 4a	ADMET	admet	nr_aromatase	nr_aromatase	D-MPNN	dmpnn	-0.154058
Fig. 4a	ADMET	admet	nr_aromatase	nr_aromatase	FCNN-FP	fcnn_fingerprint	-0.131716
Fig. 4a	ADMET	admet	nr_aromatase	nr_aromatase	FCNN-Feat	fcnn_character	-0.0966169
Fig. 4a	ADMET	admet	nr_aromatase	nr_aromatase	MolCLR	molclr	-0.109538
Fig. 4a	ADMET	admet	nr_aromatase	nr_aromatase	XGB-FP	xgboost_fingerprint	-0.143043
Fig. 4a	ADMET	admet	nr_aromatase	nr_aromatase	XGB-Feat	xgboost_character	-0.145925
Fig. 4a	ADMET	admet	nr_er	nr_er	ChemBERTa-3	chemberta3	-0.393869
Fig. 4a	ADMET	admet	nr_er	nr_er	D-MPNN	dmpnn	-0.363694
Fig. 4a	ADMET	admet	nr_er	nr_er	FCNN-FP	fcnn_fingerprint	-0.26138
Fig. 4a	ADMET	admet	nr_er	nr_er	FCNN-Feat	fcnn_character	-0.364554
Fig. 4a	ADMET	admet	nr_er	nr_er	MolCLR	molclr	-0.307449
Fig. 4a	ADMET	admet	nr_er	nr_er	XGB-FP	xgboost_fingerprint	-0.312305
Fig. 4a	ADMET	admet	nr_er	nr_er	XGB-Feat	xgboost_character	-0.415531
Fig. 4a	ADMET	admet	nr_er_lbd	nr_er_lbd	ChemBERTa-3	chemberta3	-0.390802
Fig. 4a	ADMET	admet	nr_er_lbd	nr_er_lbd	D-MPNN	dmpnn	-0.419978
Fig. 4a	ADMET	admet	nr_er_lbd	nr_er_lbd	FCNN-FP	fcnn_fingerprint	-0.288395
Fig. 4a	ADMET	admet	nr_er_lbd	nr_er_lbd	FCNN-Feat	fcnn_character	-0.373354
Fig. 4a	ADMET	admet	nr_er_lbd	nr_er_lbd	MolCLR	molclr	-0.278877
Fig. 4a	ADMET	admet	nr_er_lbd	nr_er_lbd	XGB-FP	xgboost_fingerprint	-0.294375
Fig. 4a	ADMET	admet	nr_er_lbd	nr_er_lbd	XGB-Feat	xgboost_character	-0.312451
Fig. 4a	ADMET	admet	nr_gr	nr_gr	ChemBERTa-3	chemberta3	-0.284913
Fig. 4a	ADMET	admet	nr_gr	nr_gr	D-MPNN	dmpnn	-0.458295
Fig. 4a	ADMET	admet	nr_gr	nr_gr	FCNN-FP	fcnn_fingerprint	-0.388791
Fig. 4a	ADMET	admet	nr_gr	nr_gr	FCNN-Feat	fcnn_character	-0.480042
Fig. 4a	ADMET	admet	nr_gr	nr_gr	MolCLR	molclr	-0.329275
Fig. 4a	ADMET	admet	nr_gr	nr_gr	XGB-FP	xgboost_fingerprint	-0.411332
Fig. 4a	ADMET	admet	nr_gr	nr_gr	XGB-Feat	xgboost_character	-0.418309
Fig. 4a	ADMET	admet	nr_ppar_gamma	nr_ppar_gamma	ChemBERTa-3	chemberta3	-0.0905149
Fig. 4a	ADMET	admet	nr_ppar_gamma	nr_ppar_gamma	D-MPNN	dmpnn	0.0177148
Fig. 4a	ADMET	admet	nr_ppar_gamma	nr_ppar_gamma	FCNN-FP	fcnn_fingerprint	-0.113642
Fig. 4a	ADMET	admet	nr_ppar_gamma	nr_ppar_gamma	FCNN-Feat	fcnn_character	-0.093133
Fig. 4a	ADMET	admet	nr_ppar_gamma	nr_ppar_gamma	MolCLR	molclr	-0.0524762
Fig. 4a	ADMET	admet	nr_ppar_gamma	nr_ppar_gamma	XGB-FP	xgboost_fingerprint	0.0133251
Fig. 4a	ADMET	admet	nr_ppar_gamma	nr_ppar_gamma	XGB-Feat	xgboost_character	-0.128779
Fig. 4a	ADMET	admet	nr_tr	nr_tr	ChemBERTa-3	chemberta3	-0.117311
Fig. 4a	ADMET	admet	nr_tr	nr_tr	D-MPNN	dmpnn	-0.216967
Fig. 4a	ADMET	admet	nr_tr	nr_tr	FCNN-FP	fcnn_fingerprint	-0.114233
Fig. 4a	ADMET	admet	nr_tr	nr_tr	FCNN-Feat	fcnn_character	-0.21045
Fig. 4a	ADMET	admet	nr_tr	nr_tr	MolCLR	molclr	-0.0787763
Fig. 4a	ADMET	admet	nr_tr	nr_tr	XGB-FP	xgboost_fingerprint	-0.19236
Fig. 4a	ADMET	admet	nr_tr	nr_tr	XGB-Feat	xgboost_character	-0.218701
Fig. 4a	ADMET	admet	respiratory_tox	respiratory_tox	ChemBERTa-3	chemberta3	-0.415884
Fig. 4a	ADMET	admet	respiratory_tox	respiratory_tox	D-MPNN	dmpnn	-0.472683
Fig. 4a	ADMET	admet	respiratory_tox	respiratory_tox	FCNN-FP	fcnn_fingerprint	-0.442113
Fig. 4a	ADMET	admet	respiratory_tox	respiratory_tox	FCNN-Feat	fcnn_character	-0.419411
Fig. 4a	ADMET	admet	respiratory_tox	respiratory_tox	MolCLR	molclr	-0.348451
Fig. 4a	ADMET	admet	respiratory_tox	respiratory_tox	XGB-FP	xgboost_fingerprint	-0.436735
Fig. 4a	ADMET	admet	respiratory_tox	respiratory_tox	XGB-Feat	xgboost_character	-0.51581
Fig. 4a	ADMET	admet	skin_sens	skin_sens	ChemBERTa-3	chemberta3	-0.16178
Fig. 4a	ADMET	admet	skin_sens	skin_sens	D-MPNN	dmpnn	-0.233461
Fig. 4a	ADMET	admet	skin_sens	skin_sens	FCNN-FP	fcnn_fingerprint	0.0940728
Fig. 4a	ADMET	admet	skin_sens	skin_sens	FCNN-Feat	fcnn_character	-0.0648301
Fig. 4a	ADMET	admet	skin_sens	skin_sens	MolCLR	molclr	-0.218089
Fig. 4a	ADMET	admet	skin_sens	skin_sens	XGB-FP	xgboost_fingerprint	0.0207311
Fig. 4a	ADMET	admet	skin_sens	skin_sens	XGB-Feat	xgboost_character	-0.031333
Fig. 4a	ADMET	admet	sr_are	sr_are	ChemBERTa-3	chemberta3	-0.256744
Fig. 4a	ADMET	admet	sr_are	sr_are	D-MPNN	dmpnn	-0.233213
Fig. 4a	ADMET	admet	sr_are	sr_are	FCNN-FP	fcnn_fingerprint	-0.170693
Fig. 4a	ADMET	admet	sr_are	sr_are	FCNN-Feat	fcnn_character	-0.301468
Fig. 4a	ADMET	admet	sr_are	sr_are	MolCLR	molclr	-0.156265
Fig. 4a	ADMET	admet	sr_are	sr_are	XGB-FP	xgboost_fingerprint	-0.229999
Fig. 4a	ADMET	admet	sr_are	sr_are	XGB-Feat	xgboost_character	-0.297422
Fig. 4a	ADMET	admet	sr_atad5	sr_atad5	ChemBERTa-3	chemberta3	-0.113324
Fig. 4a	ADMET	admet	sr_atad5	sr_atad5	D-MPNN	dmpnn	-0.172917
Fig. 4a	ADMET	admet	sr_atad5	sr_atad5	FCNN-FP	fcnn_fingerprint	-0.0976235
Fig. 4a	ADMET	admet	sr_atad5	sr_atad5	FCNN-Feat	fcnn_character	0.00304499
Fig. 4a	ADMET	admet	sr_atad5	sr_atad5	MolCLR	molclr	-0.00653602
Fig. 4a	ADMET	admet	sr_atad5	sr_atad5	XGB-FP	xgboost_fingerprint	-0.0769294
Fig. 4a	ADMET	admet	sr_atad5	sr_atad5	XGB-Feat	xgboost_character	-0.144806
Fig. 4a	ADMET	admet	sr_hse	sr_hse	ChemBERTa-3	chemberta3	-0.172862
Fig. 4a	ADMET	admet	sr_hse	sr_hse	D-MPNN	dmpnn	-0.112304
Fig. 4a	ADMET	admet	sr_hse	sr_hse	FCNN-FP	fcnn_fingerprint	-0.0479886
Fig. 4a	ADMET	admet	sr_hse	sr_hse	FCNN-Feat	fcnn_character	-0.15317
Fig. 4a	ADMET	admet	sr_hse	sr_hse	MolCLR	molclr	-0.151205
Fig. 4a	ADMET	admet	sr_hse	sr_hse	XGB-FP	xgboost_fingerprint	-0.101516
Fig. 4a	ADMET	admet	sr_hse	sr_hse	XGB-Feat	xgboost_character	-0.178303
Fig. 4a	ADMET	admet	sr_mmp	sr_mmp	ChemBERTa-3	chemberta3	-0.431365
Fig. 4a	ADMET	admet	sr_mmp	sr_mmp	D-MPNN	dmpnn	-0.485904
Fig. 4a	ADMET	admet	sr_mmp	sr_mmp	FCNN-FP	fcnn_fingerprint	-0.441045
Fig. 4a	ADMET	admet	sr_mmp	sr_mmp	FCNN-Feat	fcnn_character	-0.489291
Fig. 4a	ADMET	admet	sr_mmp	sr_mmp	MolCLR	molclr	-0.458633
Fig. 4a	ADMET	admet	sr_mmp	sr_mmp	XGB-FP	xgboost_fingerprint	-0.463047
Fig. 4a	ADMET	admet	sr_mmp	sr_mmp	XGB-Feat	xgboost_character	-0.475795
Fig. 4a	ADMET	admet	sr_p53	sr_p53	ChemBERTa-3	chemberta3	-0.111776
Fig. 4a	ADMET	admet	sr_p53	sr_p53	D-MPNN	dmpnn	-0.162939
Fig. 4a	ADMET	admet	sr_p53	sr_p53	FCNN-FP	fcnn_fingerprint	-0.104833
Fig. 4a	ADMET	admet	sr_p53	sr_p53	FCNN-Feat	fcnn_character	-0.141944
Fig. 4a	ADMET	admet	sr_p53	sr_p53	MolCLR	molclr	-0.0964155
Fig. 4a	ADMET	admet	sr_p53	sr_p53	XGB-FP	xgboost_fingerprint	-0.182025
Fig. 4a	ADMET	admet	sr_p53	sr_p53	XGB-Feat	xgboost_character	-0.285804
Fig. 4a	MoleculeNet	moleculenet	sider	Blood and lymphatic system disorders	ChemBERTa-3	chemberta3	-0.410375
Fig. 4a	MoleculeNet	moleculenet	sider	Blood and lymphatic system disorders	D-MPNN	dmpnn	-0.350187
Fig. 4a	MoleculeNet	moleculenet	sider	Blood and lymphatic system disorders	FCNN-FP	fcnn_fingerprint	-0.329733
Fig. 4a	MoleculeNet	moleculenet	sider	Blood and lymphatic system disorders	FCNN-Feat	fcnn_character	-0.3567
Fig. 4a	MoleculeNet	moleculenet	sider	Blood and lymphatic system disorders	MolCLR	molclr	-0.23922
Fig. 4a	MoleculeNet	moleculenet	sider	Blood and lymphatic system disorders	XGB-FP	xgboost_fingerprint	-0.341012
Fig. 4a	MoleculeNet	moleculenet	sider	Blood and lymphatic system disorders	XGB-Feat	xgboost_character	-0.273458
Fig. 4a	MoleculeNet	moleculenet	sider	Cardiac disorders	ChemBERTa-3	chemberta3	-0.201978
Fig. 4a	MoleculeNet	moleculenet	sider	Cardiac disorders	D-MPNN	dmpnn	-0.234075
Fig. 4a	MoleculeNet	moleculenet	sider	Cardiac disorders	FCNN-FP	fcnn_fingerprint	-0.115772
Fig. 4a	MoleculeNet	moleculenet	sider	Cardiac disorders	FCNN-Feat	fcnn_character	-0.233338
Fig. 4a	MoleculeNet	moleculenet	sider	Cardiac disorders	MolCLR	molclr	-0.219015
Fig. 4a	MoleculeNet	moleculenet	sider	Cardiac disorders	XGB-FP	xgboost_fingerprint	-0.240083
Fig. 4a	MoleculeNet	moleculenet	sider	Cardiac disorders	XGB-Feat	xgboost_character	-0.292338
Fig. 4a	MoleculeNet	moleculenet	sider	Ear and labyrinth disorders	ChemBERTa-3	chemberta3	-0.129189
Fig. 4a	MoleculeNet	moleculenet	sider	Ear and labyrinth disorders	D-MPNN	dmpnn	-0.218975
Fig. 4a	MoleculeNet	moleculenet	sider	Ear and labyrinth disorders	FCNN-FP	fcnn_fingerprint	-0.242576
Fig. 4a	MoleculeNet	moleculenet	sider	Ear and labyrinth disorders	FCNN-Feat	fcnn_character	-0.0861205
Fig. 4a	MoleculeNet	moleculenet	sider	Ear and labyrinth disorders	MolCLR	molclr	-0.144169
Fig. 4a	MoleculeNet	moleculenet	sider	Ear and labyrinth disorders	XGB-FP	xgboost_fingerprint	-0.221173
Fig. 4a	MoleculeNet	moleculenet	sider	Ear and labyrinth disorders	XGB-Feat	xgboost_character	0.00557683
Fig. 4a	MoleculeNet	moleculenet	sider	Endocrine disorders	ChemBERTa-3	chemberta3	-0.246081
Fig. 4a	MoleculeNet	moleculenet	sider	Endocrine disorders	D-MPNN	dmpnn	-0.0922456
Fig. 4a	MoleculeNet	moleculenet	sider	Endocrine disorders	FCNN-FP	fcnn_fingerprint	-0.183535
Fig. 4a	MoleculeNet	moleculenet	sider	Endocrine disorders	FCNN-Feat	fcnn_character	-0.174285
Fig. 4a	MoleculeNet	moleculenet	sider	Endocrine disorders	MolCLR	molclr	-0.146483
Fig. 4a	MoleculeNet	moleculenet	sider	Endocrine disorders	XGB-FP	xgboost_fingerprint	-0.0479571
Fig. 4a	MoleculeNet	moleculenet	sider	Endocrine disorders	XGB-Feat	xgboost_character	-0.223035
Fig. 4a	MoleculeNet	moleculenet	sider	Eye disorders	ChemBERTa-3	chemberta3	-0.185322
Fig. 4a	MoleculeNet	moleculenet	sider	Eye disorders	D-MPNN	dmpnn	-0.292886
Fig. 4a	MoleculeNet	moleculenet	sider	Eye disorders	FCNN-FP	fcnn_fingerprint	-0.249068
Fig. 4a	MoleculeNet	moleculenet	sider	Eye disorders	FCNN-Feat	fcnn_character	-0.289728
Fig. 4a	MoleculeNet	moleculenet	sider	Eye disorders	MolCLR	molclr	-0.10339
Fig. 4a	MoleculeNet	moleculenet	sider	Eye disorders	XGB-FP	xgboost_fingerprint	-0.168281
Fig. 4a	MoleculeNet	moleculenet	sider	Eye disorders	XGB-Feat	xgboost_character	-0.092953
Fig. 4a	MoleculeNet	moleculenet	sider	Gastrointestinal disorders	ChemBERTa-3	chemberta3	0.174908
Fig. 4a	MoleculeNet	moleculenet	sider	Gastrointestinal disorders	D-MPNN	dmpnn	-0.158576
Fig. 4a	MoleculeNet	moleculenet	sider	Gastrointestinal disorders	FCNN-FP	fcnn_fingerprint	0.0131872
Fig. 4a	MoleculeNet	moleculenet	sider	Gastrointestinal disorders	FCNN-Feat	fcnn_character	-0.429804
Fig. 4a	MoleculeNet	moleculenet	sider	Gastrointestinal disorders	MolCLR	molclr	-0.190496
Fig. 4a	MoleculeNet	moleculenet	sider	Gastrointestinal disorders	XGB-FP	xgboost_fingerprint	-0.228374
Fig. 4a	MoleculeNet	moleculenet	sider	Gastrointestinal disorders	XGB-Feat	xgboost_character	-0.374456
Fig. 4a	MoleculeNet	moleculenet	sider	Hepatobiliary disorders	ChemBERTa-3	chemberta3	-0.259806
Fig. 4a	MoleculeNet	moleculenet	sider	Hepatobiliary disorders	D-MPNN	dmpnn	-0.342075
Fig. 4a	MoleculeNet	moleculenet	sider	Hepatobiliary disorders	FCNN-FP	fcnn_fingerprint	-0.250758
Fig. 4a	MoleculeNet	moleculenet	sider	Hepatobiliary disorders	FCNN-Feat	fcnn_character	-0.322911
Fig. 4a	MoleculeNet	moleculenet	sider	Hepatobiliary disorders	MolCLR	molclr	-0.302238
Fig. 4a	MoleculeNet	moleculenet	sider	Hepatobiliary disorders	XGB-FP	xgboost_fingerprint	-0.365421
Fig. 4a	MoleculeNet	moleculenet	sider	Hepatobiliary disorders	XGB-Feat	xgboost_character	-0.44369
Fig. 4a	MoleculeNet	moleculenet	sider	Immune system disorders	ChemBERTa-3	chemberta3	-0.126052
Fig. 4a	MoleculeNet	moleculenet	sider	Immune system disorders	D-MPNN	dmpnn	-0.198487
Fig. 4a	MoleculeNet	moleculenet	sider	Immune system disorders	FCNN-FP	fcnn_fingerprint	0.054277
Fig. 4a	MoleculeNet	moleculenet	sider	Immune system disorders	FCNN-Feat	fcnn_character	-0.498484
Fig. 4a	MoleculeNet	moleculenet	sider	Immune system disorders	MolCLR	molclr	-0.159552
Fig. 4a	MoleculeNet	moleculenet	sider	Immune system disorders	XGB-FP	xgboost_fingerprint	-0.194886
Fig. 4a	MoleculeNet	moleculenet	sider	Immune system disorders	XGB-Feat	xgboost_character	-0.104545
Fig. 4a	MoleculeNet	moleculenet	sider	Injury, poisoning and procedural complications	ChemBERTa-3	chemberta3	0.0420354
Fig. 4a	MoleculeNet	moleculenet	sider	Injury, poisoning and procedural complications	D-MPNN	dmpnn	-0.0899143
Fig. 4a	MoleculeNet	moleculenet	sider	Injury, poisoning and procedural complications	FCNN-FP	fcnn_fingerprint	-0.130847
Fig. 4a	MoleculeNet	moleculenet	sider	Injury, poisoning and procedural complications	FCNN-Feat	fcnn_character	-0.00738069
Fig. 4a	MoleculeNet	moleculenet	sider	Injury, poisoning and procedural complications	MolCLR	molclr	0.00556784
Fig. 4a	MoleculeNet	moleculenet	sider	Injury, poisoning and procedural complications	XGB-FP	xgboost_fingerprint	-0.0881119
Fig. 4a	MoleculeNet	moleculenet	sider	Injury, poisoning and procedural complications	XGB-Feat	xgboost_character	-0.0808751
Fig. 4a	MoleculeNet	moleculenet	sider	Metabolism and nutrition disorders	ChemBERTa-3	chemberta3	-0.0830025
Fig. 4a	MoleculeNet	moleculenet	sider	Metabolism and nutrition disorders	D-MPNN	dmpnn	-0.190472
Fig. 4a	MoleculeNet	moleculenet	sider	Metabolism and nutrition disorders	FCNN-FP	fcnn_fingerprint	-0.211885
Fig. 4a	MoleculeNet	moleculenet	sider	Metabolism and nutrition disorders	FCNN-Feat	fcnn_character	0.0207829
Fig. 4a	MoleculeNet	moleculenet	sider	Metabolism and nutrition disorders	MolCLR	molclr	-0.175649
Fig. 4a	MoleculeNet	moleculenet	sider	Metabolism and nutrition disorders	XGB-FP	xgboost_fingerprint	-0.168051
Fig. 4a	MoleculeNet	moleculenet	sider	Metabolism and nutrition disorders	XGB-Feat	xgboost_character	0.09478
Fig. 4a	MoleculeNet	moleculenet	sider	Musculoskeletal and connective tissue disorders	ChemBERTa-3	chemberta3	-0.0143793
Fig. 4a	MoleculeNet	moleculenet	sider	Musculoskeletal and connective tissue disorders	D-MPNN	dmpnn	-0.349092
Fig. 4a	MoleculeNet	moleculenet	sider	Musculoskeletal and connective tissue disorders	FCNN-FP	fcnn_fingerprint	-0.137313
Fig. 4a	MoleculeNet	moleculenet	sider	Musculoskeletal and connective tissue disorders	FCNN-Feat	fcnn_character	-0.119558
Fig. 4a	MoleculeNet	moleculenet	sider	Musculoskeletal and connective tissue disorders	MolCLR	molclr	-0.317793
Fig. 4a	MoleculeNet	moleculenet	sider	Musculoskeletal and connective tissue disorders	XGB-FP	xgboost_fingerprint	-0.252321
Fig. 4a	MoleculeNet	moleculenet	sider	Musculoskeletal and connective tissue disorders	XGB-Feat	xgboost_character	-0.304671
Fig. 4a	MoleculeNet	moleculenet	sider	Nervous system disorders	ChemBERTa-3	chemberta3	-0.0786545
Fig. 4a	MoleculeNet	moleculenet	sider	Nervous system disorders	D-MPNN	dmpnn	-0.497279
Fig. 4a	MoleculeNet	moleculenet	sider	Nervous system disorders	FCNN-FP	fcnn_fingerprint	-0.121573
Fig. 4a	MoleculeNet	moleculenet	sider	Nervous system disorders	FCNN-Feat	fcnn_character	-0.644177
Fig. 4a	MoleculeNet	moleculenet	sider	Nervous system disorders	MolCLR	molclr	-0.307507
Fig. 4a	MoleculeNet	moleculenet	sider	Nervous system disorders	XGB-FP	xgboost_fingerprint	-0.500485
Fig. 4a	MoleculeNet	moleculenet	sider	Nervous system disorders	XGB-Feat	xgboost_character	-0.262177
Fig. 4a	MoleculeNet	moleculenet	sider	Renal and urinary disorders	ChemBERTa-3	chemberta3	-0.184595
Fig. 4a	MoleculeNet	moleculenet	sider	Renal and urinary disorders	D-MPNN	dmpnn	-0.377868
Fig. 4a	MoleculeNet	moleculenet	sider	Renal and urinary disorders	FCNN-FP	fcnn_fingerprint	-0.167043
Fig. 4a	MoleculeNet	moleculenet	sider	Renal and urinary disorders	FCNN-Feat	fcnn_character	-0.293353
Fig. 4a	MoleculeNet	moleculenet	sider	Renal and urinary disorders	MolCLR	molclr	-0.227048
Fig. 4a	MoleculeNet	moleculenet	sider	Renal and urinary disorders	XGB-FP	xgboost_fingerprint	-0.195057
Fig. 4a	MoleculeNet	moleculenet	sider	Renal and urinary disorders	XGB-Feat	xgboost_character	-0.143129
Fig. 4a	MoleculeNet	moleculenet	sider	Reproductive system and breast disorders	ChemBERTa-3	chemberta3	-0.114012
Fig. 4a	MoleculeNet	moleculenet	sider	Reproductive system and breast disorders	D-MPNN	dmpnn	-0.330207
Fig. 4a	MoleculeNet	moleculenet	sider	Reproductive system and breast disorders	FCNN-FP	fcnn_fingerprint	-0.416928
Fig. 4a	MoleculeNet	moleculenet	sider	Reproductive system and breast disorders	FCNN-Feat	fcnn_character	-0.134476
Fig. 4a	MoleculeNet	moleculenet	sider	Reproductive system and breast disorders	MolCLR	molclr	-0.0755933
Fig. 4a	MoleculeNet	moleculenet	sider	Reproductive system and breast disorders	XGB-FP	xgboost_fingerprint	-0.413286
Fig. 4a	MoleculeNet	moleculenet	sider	Reproductive system and breast disorders	XGB-Feat	xgboost_character	-0.207839
Fig. 4a	MoleculeNet	moleculenet	sider	Respiratory, thoracic and mediastinal disorders	ChemBERTa-3	chemberta3	-0.0792736
Fig. 4a	MoleculeNet	moleculenet	sider	Respiratory, thoracic and mediastinal disorders	D-MPNN	dmpnn	-0.323615
Fig. 4a	MoleculeNet	moleculenet	sider	Respiratory, thoracic and mediastinal disorders	FCNN-FP	fcnn_fingerprint	0.0471665
Fig. 4a	MoleculeNet	moleculenet	sider	Respiratory, thoracic and mediastinal disorders	FCNN-Feat	fcnn_character	0.0841697
Fig. 4a	MoleculeNet	moleculenet	sider	Respiratory, thoracic and mediastinal disorders	MolCLR	molclr	0.207048
Fig. 4a	MoleculeNet	moleculenet	sider	Respiratory, thoracic and mediastinal disorders	XGB-FP	xgboost_fingerprint	-0.105694
Fig. 4a	MoleculeNet	moleculenet	sider	Respiratory, thoracic and mediastinal disorders	XGB-Feat	xgboost_character	0.108239
Fig. 4a	MoleculeNet	moleculenet	sider	Skin and subcutaneous tissue disorders	ChemBERTa-3	chemberta3	0.196551
Fig. 4a	MoleculeNet	moleculenet	sider	Skin and subcutaneous tissue disorders	D-MPNN	dmpnn	-0.574817
Fig. 4a	MoleculeNet	moleculenet	sider	Skin and subcutaneous tissue disorders	FCNN-FP	fcnn_fingerprint	0.237406
Fig. 4a	MoleculeNet	moleculenet	sider	Skin and subcutaneous tissue disorders	FCNN-Feat	fcnn_character	-0.527397
Fig. 4a	MoleculeNet	moleculenet	sider	Skin and subcutaneous tissue disorders	MolCLR	molclr	-0.166667
Fig. 4a	MoleculeNet	moleculenet	sider	Skin and subcutaneous tissue disorders	XGB-FP	xgboost_fingerprint	0.0737208
Fig. 4a	MoleculeNet	moleculenet	sider	Skin and subcutaneous tissue disorders	XGB-Feat	xgboost_character	0.437212
Fig. 4a	MoleculeNet	moleculenet	sider	Vascular disorders	ChemBERTa-3	chemberta3	-0.221514
Fig. 4a	MoleculeNet	moleculenet	sider	Vascular disorders	D-MPNN	dmpnn	-0.32562
Fig. 4a	MoleculeNet	moleculenet	sider	Vascular disorders	FCNN-FP	fcnn_fingerprint	-0.181561
Fig. 4a	MoleculeNet	moleculenet	sider	Vascular disorders	FCNN-Feat	fcnn_character	-0.151759
Fig. 4a	MoleculeNet	moleculenet	sider	Vascular disorders	MolCLR	molclr	-0.414988
Fig. 4a	MoleculeNet	moleculenet	sider	Vascular disorders	XGB-FP	xgboost_fingerprint	-0.251082
Fig. 4a	MoleculeNet	moleculenet	sider	Vascular disorders	XGB-Feat	xgboost_character	-0.106149
Fig. 4a	MoleculeNet	moleculenet	tox21	NR-AR	ChemBERTa-3	chemberta3	-0.335922
Fig. 4a	MoleculeNet	moleculenet	tox21	NR-AR	D-MPNN	dmpnn	-0.421383
Fig. 4a	MoleculeNet	moleculenet	tox21	NR-AR	FCNN-FP	fcnn_fingerprint	-0.394979
Fig. 4a	MoleculeNet	moleculenet	tox21	NR-AR	FCNN-Feat	fcnn_character	-0.414819
Fig. 4a	MoleculeNet	moleculenet	tox21	NR-AR	MolCLR	molclr	-0.420674
Fig. 4a	MoleculeNet	moleculenet	tox21	NR-AR	XGB-FP	xgboost_fingerprint	-0.413549
Fig. 4a	MoleculeNet	moleculenet	tox21	NR-AR	XGB-Feat	xgboost_character	-0.463417
Fig. 4a	MoleculeNet	moleculenet	tox21	NR-AR-LBD	ChemBERTa-3	chemberta3	-0.409805
Fig. 4a	MoleculeNet	moleculenet	tox21	NR-AR-LBD	D-MPNN	dmpnn	-0.623252
Fig. 4a	MoleculeNet	moleculenet	tox21	NR-AR-LBD	FCNN-FP	fcnn_fingerprint	-0.543071
Fig. 4a	MoleculeNet	moleculenet	tox21	NR-AR-LBD	FCNN-Feat	fcnn_character	-0.654751
Fig. 4a	MoleculeNet	moleculenet	tox21	NR-AR-LBD	MolCLR	molclr	-0.616198
Fig. 4a	MoleculeNet	moleculenet	tox21	NR-AR-LBD	XGB-FP	xgboost_fingerprint	-0.531852
Fig. 4a	MoleculeNet	moleculenet	tox21	NR-AR-LBD	XGB-Feat	xgboost_character	-0.612861
Fig. 4a	MoleculeNet	moleculenet	tox21	NR-AhR	ChemBERTa-3	chemberta3	-0.380639
Fig. 4a	MoleculeNet	moleculenet	tox21	NR-AhR	D-MPNN	dmpnn	-0.436922
Fig. 4a	MoleculeNet	moleculenet	tox21	NR-AhR	FCNN-FP	fcnn_fingerprint	-0.436385
Fig. 4a	MoleculeNet	moleculenet	tox21	NR-AhR	FCNN-Feat	fcnn_character	-0.41111
Fig. 4a	MoleculeNet	moleculenet	tox21	NR-AhR	MolCLR	molclr	-0.409781
Fig. 4a	MoleculeNet	moleculenet	tox21	NR-AhR	XGB-FP	xgboost_fingerprint	-0.455387
Fig. 4a	MoleculeNet	moleculenet	tox21	NR-AhR	XGB-Feat	xgboost_character	-0.342034
Fig. 4a	MoleculeNet	moleculenet	tox21	NR-Aromatase	ChemBERTa-3	chemberta3	-0.205534
Fig. 4a	MoleculeNet	moleculenet	tox21	NR-Aromatase	D-MPNN	dmpnn	-0.241877
Fig. 4a	MoleculeNet	moleculenet	tox21	NR-Aromatase	FCNN-FP	fcnn_fingerprint	-0.219006
Fig. 4a	MoleculeNet	moleculenet	tox21	NR-Aromatase	FCNN-Feat	fcnn_character	-0.122505
Fig. 4a	MoleculeNet	moleculenet	tox21	NR-Aromatase	MolCLR	molclr	-0.229142
Fig. 4a	MoleculeNet	moleculenet	tox21	NR-Aromatase	XGB-FP	xgboost_fingerprint	-0.249796
Fig. 4a	MoleculeNet	moleculenet	tox21	NR-Aromatase	XGB-Feat	xgboost_character	-0.163761
Fig. 4a	MoleculeNet	moleculenet	tox21	NR-ER	ChemBERTa-3	chemberta3	-0.367146
Fig. 4a	MoleculeNet	moleculenet	tox21	NR-ER	D-MPNN	dmpnn	-0.296502
Fig. 4a	MoleculeNet	moleculenet	tox21	NR-ER	FCNN-FP	fcnn_fingerprint	-0.27807
Fig. 4a	MoleculeNet	moleculenet	tox21	NR-ER	FCNN-Feat	fcnn_character	-0.41212
Fig. 4a	MoleculeNet	moleculenet	tox21	NR-ER	MolCLR	molclr	-0.28876
Fig. 4a	MoleculeNet	moleculenet	tox21	NR-ER	XGB-FP	xgboost_fingerprint	-0.344929
Fig. 4a	MoleculeNet	moleculenet	tox21	NR-ER	XGB-Feat	xgboost_character	-0.328728
Fig. 4a	MoleculeNet	moleculenet	tox21	NR-ER-LBD	ChemBERTa-3	chemberta3	-0.336262
Fig. 4a	MoleculeNet	moleculenet	tox21	NR-ER-LBD	D-MPNN	dmpnn	-0.358637
Fig. 4a	MoleculeNet	moleculenet	tox21	NR-ER-LBD	FCNN-FP	fcnn_fingerprint	-0.332962
Fig. 4a	MoleculeNet	moleculenet	tox21	NR-ER-LBD	FCNN-Feat	fcnn_character	-0.291067
Fig. 4a	MoleculeNet	moleculenet	tox21	NR-ER-LBD	MolCLR	molclr	-0.294761
Fig. 4a	MoleculeNet	moleculenet	tox21	NR-ER-LBD	XGB-FP	xgboost_fingerprint	-0.363747
Fig. 4a	MoleculeNet	moleculenet	tox21	NR-ER-LBD	XGB-Feat	xgboost_character	-0.296039
Fig. 4a	MoleculeNet	moleculenet	tox21	NR-PPAR-gamma	ChemBERTa-3	chemberta3	-0.113208
Fig. 4a	MoleculeNet	moleculenet	tox21	NR-PPAR-gamma	D-MPNN	dmpnn	-0.17829
Fig. 4a	MoleculeNet	moleculenet	tox21	NR-PPAR-gamma	FCNN-FP	fcnn_fingerprint	-0.0688846
Fig. 4a	MoleculeNet	moleculenet	tox21	NR-PPAR-gamma	FCNN-Feat	fcnn_character	-0.155023
Fig. 4a	MoleculeNet	moleculenet	tox21	NR-PPAR-gamma	MolCLR	molclr	-0.152104
Fig. 4a	MoleculeNet	moleculenet	tox21	NR-PPAR-gamma	XGB-FP	xgboost_fingerprint	-0.229751
Fig. 4a	MoleculeNet	moleculenet	tox21	NR-PPAR-gamma	XGB-Feat	xgboost_character	-0.169693
Fig. 4a	MoleculeNet	moleculenet	tox21	SR-ARE	ChemBERTa-3	chemberta3	-0.267891
Fig. 4a	MoleculeNet	moleculenet	tox21	SR-ARE	D-MPNN	dmpnn	-0.281697
Fig. 4a	MoleculeNet	moleculenet	tox21	SR-ARE	FCNN-FP	fcnn_fingerprint	-0.203702
Fig. 4a	MoleculeNet	moleculenet	tox21	SR-ARE	FCNN-Feat	fcnn_character	-0.309045
Fig. 4a	MoleculeNet	moleculenet	tox21	SR-ARE	MolCLR	molclr	-0.207471
Fig. 4a	MoleculeNet	moleculenet	tox21	SR-ARE	XGB-FP	xgboost_fingerprint	-0.281617
Fig. 4a	MoleculeNet	moleculenet	tox21	SR-ARE	XGB-Feat	xgboost_character	-0.234896
Fig. 4a	MoleculeNet	moleculenet	tox21	SR-ATAD5	ChemBERTa-3	chemberta3	-0.178058
Fig. 4a	MoleculeNet	moleculenet	tox21	SR-ATAD5	D-MPNN	dmpnn	-0.116157
Fig. 4a	MoleculeNet	moleculenet	tox21	SR-ATAD5	FCNN-FP	fcnn_fingerprint	-0.0983809
Fig. 4a	MoleculeNet	moleculenet	tox21	SR-ATAD5	FCNN-Feat	fcnn_character	-0.151343
Fig. 4a	MoleculeNet	moleculenet	tox21	SR-ATAD5	MolCLR	molclr	-0.0351263
Fig. 4a	MoleculeNet	moleculenet	tox21	SR-ATAD5	XGB-FP	xgboost_fingerprint	-0.115372
Fig. 4a	MoleculeNet	moleculenet	tox21	SR-ATAD5	XGB-Feat	xgboost_character	-0.0803496
Fig. 4a	MoleculeNet	moleculenet	tox21	SR-HSE	ChemBERTa-3	chemberta3	-0.110631
Fig. 4a	MoleculeNet	moleculenet	tox21	SR-HSE	D-MPNN	dmpnn	-0.0907683
Fig. 4a	MoleculeNet	moleculenet	tox21	SR-HSE	FCNN-FP	fcnn_fingerprint	-0.0670598
Fig. 4a	MoleculeNet	moleculenet	tox21	SR-HSE	FCNN-Feat	fcnn_character	-0.0711905
Fig. 4a	MoleculeNet	moleculenet	tox21	SR-HSE	MolCLR	molclr	-0.165851
Fig. 4a	MoleculeNet	moleculenet	tox21	SR-HSE	XGB-FP	xgboost_fingerprint	-0.16112
Fig. 4a	MoleculeNet	moleculenet	tox21	SR-HSE	XGB-Feat	xgboost_character	-0.185507
Fig. 4a	MoleculeNet	moleculenet	tox21	SR-MMP	ChemBERTa-3	chemberta3	-0.486174
Fig. 4a	MoleculeNet	moleculenet	tox21	SR-MMP	D-MPNN	dmpnn	-0.490044
Fig. 4a	MoleculeNet	moleculenet	tox21	SR-MMP	FCNN-FP	fcnn_fingerprint	-0.45886
Fig. 4a	MoleculeNet	moleculenet	tox21	SR-MMP	FCNN-Feat	fcnn_character	-0.484787
Fig. 4a	MoleculeNet	moleculenet	tox21	SR-MMP	MolCLR	molclr	-0.336355
Fig. 4a	MoleculeNet	moleculenet	tox21	SR-MMP	XGB-FP	xgboost_fingerprint	-0.516759
Fig. 4a	MoleculeNet	moleculenet	tox21	SR-MMP	XGB-Feat	xgboost_character	-0.403177
Fig. 4a	MoleculeNet	moleculenet	tox21	SR-p53	ChemBERTa-3	chemberta3	-0.178096
Fig. 4a	MoleculeNet	moleculenet	tox21	SR-p53	D-MPNN	dmpnn	-0.290153
Fig. 4a	MoleculeNet	moleculenet	tox21	SR-p53	FCNN-FP	fcnn_fingerprint	-0.132778
Fig. 4a	MoleculeNet	moleculenet	tox21	SR-p53	FCNN-Feat	fcnn_character	-0.240465
Fig. 4a	MoleculeNet	moleculenet	tox21	SR-p53	MolCLR	molclr	-0.192373
Fig. 4a	MoleculeNet	moleculenet	tox21	SR-p53	XGB-FP	xgboost_fingerprint	-0.280087
Fig. 4a	MoleculeNet	moleculenet	tox21	SR-p53	XGB-Feat	xgboost_character	-0.292155
Fig. 4a	MoleculeNet	moleculenet	toxcast	APR_HepG2_CellLoss_24h_dn	ChemBERTa-3	chemberta3	-0.106258
Fig. 4a	MoleculeNet	moleculenet	toxcast	APR_HepG2_CellLoss_24h_dn	D-MPNN	dmpnn	-0.13751
Fig. 4a	MoleculeNet	moleculenet	toxcast	APR_HepG2_CellLoss_24h_dn	FCNN-FP	fcnn_fingerprint	-0.0517191
Fig. 4a	MoleculeNet	moleculenet	toxcast	APR_HepG2_CellLoss_24h_dn	FCNN-Feat	fcnn_character	-0.1122
Fig. 4a	MoleculeNet	moleculenet	toxcast	APR_HepG2_CellLoss_24h_dn	MolCLR	molclr	-0.113517
Fig. 4a	MoleculeNet	moleculenet	toxcast	APR_HepG2_CellLoss_24h_dn	XGB-FP	xgboost_fingerprint	0.00333576
Fig. 4a	MoleculeNet	moleculenet	toxcast	APR_HepG2_CellLoss_24h_dn	XGB-Feat	xgboost_character	-0.0462072
Fig. 4a	MoleculeNet	moleculenet	toxcast	APR_HepG2_MitoMembPot_24h_dn	ChemBERTa-3	chemberta3	-0.201022
Fig. 4a	MoleculeNet	moleculenet	toxcast	APR_HepG2_MitoMembPot_24h_dn	D-MPNN	dmpnn	-0.271853
Fig. 4a	MoleculeNet	moleculenet	toxcast	APR_HepG2_MitoMembPot_24h_dn	FCNN-FP	fcnn_fingerprint	-0.0289329
Fig. 4a	MoleculeNet	moleculenet	toxcast	APR_HepG2_MitoMembPot_24h_dn	FCNN-Feat	fcnn_character	-0.129354
Fig. 4a	MoleculeNet	moleculenet	toxcast	APR_HepG2_MitoMembPot_24h_dn	MolCLR	molclr	-0.124714
Fig. 4a	MoleculeNet	moleculenet	toxcast	APR_HepG2_MitoMembPot_24h_dn	XGB-FP	xgboost_fingerprint	-0.087782
Fig. 4a	MoleculeNet	moleculenet	toxcast	APR_HepG2_MitoMembPot_24h_dn	XGB-Feat	xgboost_character	-0.0998682
Fig. 4a	MoleculeNet	moleculenet	toxcast	APR_HepG2_OxidativeStress_24h_up	ChemBERTa-3	chemberta3	-0.120731
Fig. 4a	MoleculeNet	moleculenet	toxcast	APR_HepG2_OxidativeStress_24h_up	D-MPNN	dmpnn	-0.140509
Fig. 4a	MoleculeNet	moleculenet	toxcast	APR_HepG2_OxidativeStress_24h_up	FCNN-FP	fcnn_fingerprint	0.030723
Fig. 4a	MoleculeNet	moleculenet	toxcast	APR_HepG2_OxidativeStress_24h_up	FCNN-Feat	fcnn_character	-0.171427
Fig. 4a	MoleculeNet	moleculenet	toxcast	APR_HepG2_OxidativeStress_24h_up	MolCLR	molclr	-0.00152148
Fig. 4a	MoleculeNet	moleculenet	toxcast	APR_HepG2_OxidativeStress_24h_up	XGB-FP	xgboost_fingerprint	0.0454658
Fig. 4a	MoleculeNet	moleculenet	toxcast	APR_HepG2_OxidativeStress_24h_up	XGB-Feat	xgboost_character	-0.0282947
Fig. 4a	MoleculeNet	moleculenet	toxcast	NVS_NR_hER	ChemBERTa-3	chemberta3	-0.37079
Fig. 4a	MoleculeNet	moleculenet	toxcast	NVS_NR_hER	D-MPNN	dmpnn	-0.39113
Fig. 4a	MoleculeNet	moleculenet	toxcast	NVS_NR_hER	FCNN-FP	fcnn_fingerprint	-0.382805
Fig. 4a	MoleculeNet	moleculenet	toxcast	NVS_NR_hER	FCNN-Feat	fcnn_character	-0.251915
Fig. 4a	MoleculeNet	moleculenet	toxcast	NVS_NR_hER	MolCLR	molclr	-0.288337
Fig. 4a	MoleculeNet	moleculenet	toxcast	NVS_NR_hER	XGB-FP	xgboost_fingerprint	-0.355047
Fig. 4a	MoleculeNet	moleculenet	toxcast	NVS_NR_hER	XGB-Feat	xgboost_character	-0.170386
Fig. 4a	MoleculeNet	moleculenet	toxcast	NVS_NR_hPPARg	ChemBERTa-3	chemberta3	-0.0143559
Fig. 4a	MoleculeNet	moleculenet	toxcast	NVS_NR_hPPARg	D-MPNN	dmpnn	-0.0840216
Fig. 4a	MoleculeNet	moleculenet	toxcast	NVS_NR_hPPARg	FCNN-FP	fcnn_fingerprint	-0.0557461
Fig. 4a	MoleculeNet	moleculenet	toxcast	NVS_NR_hPPARg	FCNN-Feat	fcnn_character	-0.199995
Fig. 4a	MoleculeNet	moleculenet	toxcast	NVS_NR_hPPARg	MolCLR	molclr	0.0410129
Fig. 4a	MoleculeNet	moleculenet	toxcast	NVS_NR_hPPARg	XGB-FP	xgboost_fingerprint	-0.00166412
Fig. 4a	MoleculeNet	moleculenet	toxcast	NVS_NR_hPPARg	XGB-Feat	xgboost_character	-0.0195393
Fig. 4a	MoleculeNet	moleculenet	toxcast	NVS_NR_hPXR	ChemBERTa-3	chemberta3	0.00556467
Fig. 4a	MoleculeNet	moleculenet	toxcast	NVS_NR_hPXR	D-MPNN	dmpnn	0.031898
Fig. 4a	MoleculeNet	moleculenet	toxcast	NVS_NR_hPXR	FCNN-FP	fcnn_fingerprint	-0.0114266
Fig. 4a	MoleculeNet	moleculenet	toxcast	NVS_NR_hPXR	FCNN-Feat	fcnn_character	-0.00102331
Fig. 4a	MoleculeNet	moleculenet	toxcast	NVS_NR_hPXR	MolCLR	molclr	-0.0802525
Fig. 4a	MoleculeNet	moleculenet	toxcast	NVS_NR_hPXR	XGB-FP	xgboost_fingerprint	-0.0134005
Fig. 4a	MoleculeNet	moleculenet	toxcast	NVS_NR_hPXR	XGB-Feat	xgboost_character	0.127121
Fig. 4a	MoleculeNet	moleculenet	toxcast	Tanguay_ZF_120hpf_AXIS_up	ChemBERTa-3	chemberta3	-0.00125661
Fig. 4a	MoleculeNet	moleculenet	toxcast	Tanguay_ZF_120hpf_AXIS_up	D-MPNN	dmpnn	0.0389192
Fig. 4a	MoleculeNet	moleculenet	toxcast	Tanguay_ZF_120hpf_AXIS_up	FCNN-FP	fcnn_fingerprint	-0.00875179
Fig. 4a	MoleculeNet	moleculenet	toxcast	Tanguay_ZF_120hpf_AXIS_up	FCNN-Feat	fcnn_character	0.0470619
Fig. 4a	MoleculeNet	moleculenet	toxcast	Tanguay_ZF_120hpf_AXIS_up	MolCLR	molclr	-0.0331929
Fig. 4a	MoleculeNet	moleculenet	toxcast	Tanguay_ZF_120hpf_AXIS_up	XGB-FP	xgboost_fingerprint	-0.0723428
Fig. 4a	MoleculeNet	moleculenet	toxcast	Tanguay_ZF_120hpf_AXIS_up	XGB-Feat	xgboost_character	0.154291
Fig. 4a	MoleculeNet	moleculenet	toxcast	Tanguay_ZF_120hpf_MORT_up	ChemBERTa-3	chemberta3	0.00237824
Fig. 4a	MoleculeNet	moleculenet	toxcast	Tanguay_ZF_120hpf_MORT_up	D-MPNN	dmpnn	-0.0838477
Fig. 4a	MoleculeNet	moleculenet	toxcast	Tanguay_ZF_120hpf_MORT_up	FCNN-FP	fcnn_fingerprint	0.0228369
Fig. 4a	MoleculeNet	moleculenet	toxcast	Tanguay_ZF_120hpf_MORT_up	FCNN-Feat	fcnn_character	-0.112643
Fig. 4a	MoleculeNet	moleculenet	toxcast	Tanguay_ZF_120hpf_MORT_up	MolCLR	molclr	-0.0286197
Fig. 4a	MoleculeNet	moleculenet	toxcast	Tanguay_ZF_120hpf_MORT_up	XGB-FP	xgboost_fingerprint	-0.0360206
Fig. 4a	MoleculeNet	moleculenet	toxcast	Tanguay_ZF_120hpf_MORT_up	XGB-Feat	xgboost_character	-0.0228105
Fig. 4b — Within-fold ΔnormPR (no-scaffold − scaffold-bearing)
Figure panel	Benchmark	Benchmark key	Dataset	Target	Model	Model key	Fold	normPR no-scaffold	normPR scaffold-bearing	Delta normPR (no-scaffold - scaffold-bearing)
Fig. 4b	ADMET	admet	ames	ames	ChemBERTa-3	chemberta3	1	0.448309	0.713626	-0.265318
Fig. 4b	ADMET	admet	ames	ames	D-MPNN	dmpnn	1	0.46963	0.72297	-0.253339
Fig. 4b	ADMET	admet	ames	ames	FCNN-FP	fcnn_fingerprint	1	0.440933	0.629766	-0.188834
Fig. 4b	ADMET	admet	ames	ames	FCNN-Feat	fcnn_character	1	0.38789	0.689631	-0.301741
Fig. 4b	ADMET	admet	ames	ames	MolCLR	molclr	1	0.538772	0.778184	-0.239412
Fig. 4b	ADMET	admet	ames	ames	XGB-FP	xgboost_fingerprint	1	0.548779	0.677684	-0.128904
Fig. 4b	ADMET	admet	ames	ames	XGB-Feat	xgboost_character	1	0.375211	0.690758	-0.315547
Fig. 4b	ADMET	admet	avian_tox	avian_tox	ChemBERTa-3	chemberta3	1	0.465235	0.641491	-0.176256
Fig. 4b	ADMET	admet	avian_tox	avian_tox	D-MPNN	dmpnn	1	0.453475	0.501577	-0.0481014
Fig. 4b	ADMET	admet	avian_tox	avian_tox	FCNN-FP	fcnn_fingerprint	1	0.23292	0.591667	-0.358747
Fig. 4b	ADMET	admet	avian_tox	avian_tox	FCNN-Feat	fcnn_character	1	0.437982	0.424942	0.0130396
Fig. 4b	ADMET	admet	avian_tox	avian_tox	MolCLR	molclr	1	0.294667	0.294379	0.000287277
Fig. 4b	ADMET	admet	avian_tox	avian_tox	XGB-FP	xgboost_fingerprint	1	0.221142	0.563714	-0.342572
Fig. 4b	ADMET	admet	avian_tox	avian_tox	XGB-Feat	xgboost_character	1	0.432029	0.421072	0.0109568
Fig. 4b	ADMET	admet	bee_tox	bee_tox	ChemBERTa-3	chemberta3	1	0.642836	0.821502	-0.178666
Fig. 4b	ADMET	admet	bee_tox	bee_tox	D-MPNN	dmpnn	1	0.523593	0.804206	-0.280613
Fig. 4b	ADMET	admet	bee_tox	bee_tox	FCNN-FP	fcnn_fingerprint	1	0.577774	0.798996	-0.221222
Fig. 4b	ADMET	admet	bee_tox	bee_tox	FCNN-Feat	fcnn_character	1	0.729555	0.61807	0.111485
Fig. 4b	ADMET	admet	bee_tox	bee_tox	MolCLR	molclr	1	0.2202	-0.168049	0.38825
Fig. 4b	ADMET	admet	bee_tox	bee_tox	XGB-FP	xgboost_fingerprint	1	0.646076	0.783916	-0.13784
Fig. 4b	ADMET	admet	bee_tox	bee_tox	XGB-Feat	xgboost_character	1	0.713555	0.614909	0.0986461
Fig. 4b	ADMET	admet	biodegradation	biodegradation	ChemBERTa-3	chemberta3	1	0.607613	0.480506	0.127107
Fig. 4b	ADMET	admet	biodegradation	biodegradation	D-MPNN	dmpnn	1	0.584418	0.402007	0.182411
Fig. 4b	ADMET	admet	biodegradation	biodegradation	FCNN-FP	fcnn_fingerprint	1	0.633556	0.397868	0.235688
Fig. 4b	ADMET	admet	biodegradation	biodegradation	FCNN-Feat	fcnn_character	1	0.444931	0.490593	-0.0456618
Fig. 4b	ADMET	admet	biodegradation	biodegradation	MolCLR	molclr	1	0.424191	0.374674	0.0495173
Fig. 4b	ADMET	admet	biodegradation	biodegradation	XGB-FP	xgboost_fingerprint	1	0.545038	0.347828	0.19721
Fig. 4b	ADMET	admet	biodegradation	biodegradation	XGB-Feat	xgboost_character	1	0.36326	0.412911	-0.049651
Fig. 4b	ADMET	admet	carcinogenicity	carcinogenicity	ChemBERTa-3	chemberta3	1	0.350744	0.353705	-0.00296157
Fig. 4b	ADMET	admet	carcinogenicity	carcinogenicity	D-MPNN	dmpnn	1	0.36415	0.304682	0.0594677
Fig. 4b	ADMET	admet	carcinogenicity	carcinogenicity	FCNN-FP	fcnn_fingerprint	1	0.424962	0.275891	0.149072
Fig. 4b	ADMET	admet	carcinogenicity	carcinogenicity	FCNN-Feat	fcnn_character	1	0.300944	0.269897	0.0310467
Fig. 4b	ADMET	admet	carcinogenicity	carcinogenicity	MolCLR	molclr	1	0.303726	0.213254	0.0904723
Fig. 4b	ADMET	admet	carcinogenicity	carcinogenicity	XGB-FP	xgboost_fingerprint	1	0.357141	0.267216	0.0899257
Fig. 4b	ADMET	admet	carcinogenicity	carcinogenicity	XGB-Feat	xgboost_character	1	0.245904	0.249127	-0.00322273
Fig. 4b	ADMET	admet	crustacean	crustacean	ChemBERTa-3	chemberta3	1	0.430662	0.611646	-0.180984
Fig. 4b	ADMET	admet	crustacean	crustacean	D-MPNN	dmpnn	1	0.288816	0.630569	-0.341753
Fig. 4b	ADMET	admet	crustacean	crustacean	FCNN-FP	fcnn_fingerprint	1	0.434621	0.605425	-0.170804
Fig. 4b	ADMET	admet	crustacean	crustacean	FCNN-Feat	fcnn_character	1	0.484173	0.624892	-0.140719
Fig. 4b	ADMET	admet	crustacean	crustacean	MolCLR	molclr	1	0.362195	0.542599	-0.180405
Fig. 4b	ADMET	admet	crustacean	crustacean	XGB-FP	xgboost_fingerprint	1	0.411657	0.456612	-0.0449552
Fig. 4b	ADMET	admet	crustacean	crustacean	XGB-Feat	xgboost_character	1	0.505996	0.713373	-0.207378
Fig. 4b	ADMET	admet	eye_corrosion	eye_corrosion	ChemBERTa-3	chemberta3	1	0.462554	0.886131	-0.423576
Fig. 4b	ADMET	admet	eye_corrosion	eye_corrosion	D-MPNN	dmpnn	1	0.553147	0.924815	-0.371668
Fig. 4b	ADMET	admet	eye_corrosion	eye_corrosion	FCNN-FP	fcnn_fingerprint	1	0.439627	0.862285	-0.422658
Fig. 4b	ADMET	admet	eye_corrosion	eye_corrosion	FCNN-Feat	fcnn_character	1	0.592423	0.944444	-0.35202
Fig. 4b	ADMET	admet	eye_corrosion	eye_corrosion	MolCLR	molclr	1	0.117636	0.178191	-0.0605544
Fig. 4b	ADMET	admet	eye_corrosion	eye_corrosion	XGB-FP	xgboost_fingerprint	1	0.318301	0.861054	-0.542753
Fig. 4b	ADMET	admet	eye_corrosion	eye_corrosion	XGB-Feat	xgboost_character	1	0.628426	0.929463	-0.301037
Fig. 4b	ADMET	admet	eye_irritation	eye_irritation	ChemBERTa-3	chemberta3	1	0.42718	0.911309	-0.484129
Fig. 4b	ADMET	admet	eye_irritation	eye_irritation	D-MPNN	dmpnn	1	0.483041	0.909674	-0.426633
Fig. 4b	ADMET	admet	eye_irritation	eye_irritation	FCNN-FP	fcnn_fingerprint	1	0.511737	0.785054	-0.273318
Fig. 4b	ADMET	admet	eye_irritation	eye_irritation	FCNN-Feat	fcnn_character	1	0.518714	0.84714	-0.328426
Fig. 4b	ADMET	admet	eye_irritation	eye_irritation	MolCLR	molclr	1	0.38608	0.885806	-0.499725
Fig. 4b	ADMET	admet	eye_irritation	eye_irritation	XGB-FP	xgboost_fingerprint	1	0.299131	0.855826	-0.556695
Fig. 4b	ADMET	admet	eye_irritation	eye_irritation	XGB-Feat	xgboost_character	1	0.511077	0.899111	-0.388034
Fig. 4b	ADMET	admet	h_ht	h_ht	ChemBERTa-3	chemberta3	1	0.128707	0.459989	-0.331282
Fig. 4b	ADMET	admet	h_ht	h_ht	D-MPNN	dmpnn	1	0.0352315	0.381986	-0.346755
Fig. 4b	ADMET	admet	h_ht	h_ht	FCNN-FP	fcnn_fingerprint	1	0.177247	0.406863	-0.229616
Fig. 4b	ADMET	admet	h_ht	h_ht	FCNN-Feat	fcnn_character	1	0.0208227	0.234901	-0.214078
Fig. 4b	ADMET	admet	h_ht	h_ht	MolCLR	molclr	1	0.173178	0.43683	-0.263652
Fig. 4b	ADMET	admet	h_ht	h_ht	XGB-FP	xgboost_fingerprint	1	0.15683	0.397581	-0.240751
Fig. 4b	ADMET	admet	h_ht	h_ht	XGB-Feat	xgboost_character	1	-0.00221717	0.402999	-0.405216
Fig. 4b	ADMET	admet	micronucleus_tox	micronucleus_tox	ChemBERTa-3	chemberta3	1	0.722957	0.805153	-0.0821957
Fig. 4b	ADMET	admet	micronucleus_tox	micronucleus_tox	D-MPNN	dmpnn	1	0.585371	0.8526	-0.267229
Fig. 4b	ADMET	admet	micronucleus_tox	micronucleus_tox	FCNN-FP	fcnn_fingerprint	1	0.531589	0.80959	-0.278001
Fig. 4b	ADMET	admet	micronucleus_tox	micronucleus_tox	FCNN-Feat	fcnn_character	1	0.478756	0.607589	-0.128833
Fig. 4b	ADMET	admet	micronucleus_tox	micronucleus_tox	MolCLR	molclr	1	0.623782	0.713662	-0.0898798
Fig. 4b	ADMET	admet	micronucleus_tox	micronucleus_tox	XGB-FP	xgboost_fingerprint	1	0.372193	0.653403	-0.281211
Fig. 4b	ADMET	admet	micronucleus_tox	micronucleus_tox	XGB-Feat	xgboost_character	1	0.411599	0.604124	-0.192526
Fig. 4b	ADMET	admet	nr_ahr	nr_ahr	ChemBERTa-3	chemberta3	1	0.119513	0.449322	-0.329809
Fig. 4b	ADMET	admet	nr_ahr	nr_ahr	D-MPNN	dmpnn	1	0.142357	0.496561	-0.354205
Fig. 4b	ADMET	admet	nr_ahr	nr_ahr	FCNN-FP	fcnn_fingerprint	1	0.0655567	0.49527	-0.429713
Fig. 4b	ADMET	admet	nr_ahr	nr_ahr	FCNN-Feat	fcnn_character	1	0.111244	0.55118	-0.439935
Fig. 4b	ADMET	admet	nr_ahr	nr_ahr	MolCLR	molclr	1	0.121651	0.474027	-0.352376
Fig. 4b	ADMET	admet	nr_ahr	nr_ahr	XGB-FP	xgboost_fingerprint	1	0.0997404	0.554442	-0.454701
Fig. 4b	ADMET	admet	nr_ahr	nr_ahr	XGB-Feat	xgboost_character	1	0.0669205	0.506648	-0.439728
Fig. 4b	ADMET	admet	nr_ar	nr_ar	ChemBERTa-3	chemberta3	1	0.00387335	0.345612	-0.341738
Fig. 4b	ADMET	admet	nr_ar	nr_ar	D-MPNN	dmpnn	1	0.00294291	0.265842	-0.262899
Fig. 4b	ADMET	admet	nr_ar	nr_ar	FCNN-FP	fcnn_fingerprint	1	0.000109448	0.393374	-0.393265
Fig. 4b	ADMET	admet	nr_ar	nr_ar	FCNN-Feat	fcnn_character	1	0.0104347	0.400509	-0.390075
Fig. 4b	ADMET	admet	nr_ar	nr_ar	MolCLR	molclr	1	3.41798e-05	0.339717	-0.339682
Fig. 4b	ADMET	admet	nr_ar	nr_ar	XGB-FP	xgboost_fingerprint	1	0.00198778	0.442434	-0.440446
Fig. 4b	ADMET	admet	nr_ar	nr_ar	XGB-Feat	xgboost_character	1	0.00994066	0.386741	-0.376801
Fig. 4b	ADMET	admet	nr_ar_lbd	nr_ar_lbd	ChemBERTa-3	chemberta3	1	0.0259303	0.572674	-0.546744
Fig. 4b	ADMET	admet	nr_ar_lbd	nr_ar_lbd	D-MPNN	dmpnn	1	0.1304	0.724201	-0.593801
Fig. 4b	ADMET	admet	nr_ar_lbd	nr_ar_lbd	FCNN-FP	fcnn_fingerprint	1	0.0136549	0.669947	-0.656292
Fig. 4b	ADMET	admet	nr_ar_lbd	nr_ar_lbd	FCNN-Feat	fcnn_character	1	0.151489	0.585463	-0.433974
Fig. 4b	ADMET	admet	nr_ar_lbd	nr_ar_lbd	MolCLR	molclr	1	0.0217616	0.569373	-0.547612
Fig. 4b	ADMET	admet	nr_ar_lbd	nr_ar_lbd	XGB-FP	xgboost_fingerprint	1	0.0562807	0.633695	-0.577414
Fig. 4b	ADMET	admet	nr_ar_lbd	nr_ar_lbd	XGB-Feat	xgboost_character	1	0.0281081	0.551543	-0.523434
Fig. 4b	ADMET	admet	nr_aromatase	nr_aromatase	ChemBERTa-3	chemberta3	1	0.0575915	0.281528	-0.223936
Fig. 4b	ADMET	admet	nr_aromatase	nr_aromatase	D-MPNN	dmpnn	1	0.0868245	0.389903	-0.303078
Fig. 4b	ADMET	admet	nr_aromatase	nr_aromatase	FCNN-FP	fcnn_fingerprint	1	0.00420989	0.0632479	-0.059038
Fig. 4b	ADMET	admet	nr_aromatase	nr_aromatase	FCNN-Feat	fcnn_character	1	0.0473528	0.170054	-0.122701
Fig. 4b	ADMET	admet	nr_aromatase	nr_aromatase	MolCLR	molclr	1	0.040665	0.174933	-0.134268
Fig. 4b	ADMET	admet	nr_aromatase	nr_aromatase	XGB-FP	xgboost_fingerprint	1	0.0631359	0.308136	-0.245
Fig. 4b	ADMET	admet	nr_aromatase	nr_aromatase	XGB-Feat	xgboost_character	1	0.0510895	0.158426	-0.107336
Fig. 4b	ADMET	admet	nr_er	nr_er	ChemBERTa-3	chemberta3	1	0.0357946	0.463161	-0.427367
Fig. 4b	ADMET	admet	nr_er	nr_er	D-MPNN	dmpnn	1	0.0117983	0.421281	-0.409482
Fig. 4b	ADMET	admet	nr_er	nr_er	FCNN-FP	fcnn_fingerprint	1	0.00918426	0.356711	-0.347527
Fig. 4b	ADMET	admet	nr_er	nr_er	FCNN-Feat	fcnn_character	1	0.0102525	0.468337	-0.458085
Fig. 4b	ADMET	admet	nr_er	nr_er	MolCLR	molclr	1	0.0418927	0.418351	-0.376458
Fig. 4b	ADMET	admet	nr_er	nr_er	XGB-FP	xgboost_fingerprint	1	0.037868	0.322789	-0.284921
Fig. 4b	ADMET	admet	nr_er	nr_er	XGB-Feat	xgboost_character	1	0.0197824	0.418077	-0.398295
Fig. 4b	ADMET	admet	nr_er_lbd	nr_er_lbd	ChemBERTa-3	chemberta3	1	0.0246801	0.368368	-0.343687
Fig. 4b	ADMET	admet	nr_er_lbd	nr_er_lbd	D-MPNN	dmpnn	1	0.065176	0.521358	-0.456182
Fig. 4b	ADMET	admet	nr_er_lbd	nr_er_lbd	FCNN-FP	fcnn_fingerprint	1	0.105061	0.390775	-0.285713
Fig. 4b	ADMET	admet	nr_er_lbd	nr_er_lbd	FCNN-Feat	fcnn_character	1	0.0148796	0.110442	-0.0955622
Fig. 4b	ADMET	admet	nr_er_lbd	nr_er_lbd	MolCLR	molclr	1	0.0633145	0.298648	-0.235333
Fig. 4b	ADMET	admet	nr_er_lbd	nr_er_lbd	XGB-FP	xgboost_fingerprint	1	0.111429	0.489177	-0.377749
Fig. 4b	ADMET	admet	nr_er_lbd	nr_er_lbd	XGB-Feat	xgboost_character	1	0.0433002	0.284053	-0.240753
Fig. 4b	ADMET	admet	nr_gr	nr_gr	ChemBERTa-3	chemberta3	1	0.0437889	0.374486	-0.330697
Fig. 4b	ADMET	admet	nr_gr	nr_gr	D-MPNN	dmpnn	1	0.0470086	0.318378	-0.271369
Fig. 4b	ADMET	admet	nr_gr	nr_gr	FCNN-FP	fcnn_fingerprint	1	0.0164028	0.254145	-0.237742
Fig. 4b	ADMET	admet	nr_gr	nr_gr	FCNN-Feat	fcnn_character	1	0.0354254	0.446897	-0.411471
Fig. 4b	ADMET	admet	nr_gr	nr_gr	MolCLR	molclr	1	0.064916	0.257183	-0.192267
Fig. 4b	ADMET	admet	nr_gr	nr_gr	XGB-FP	xgboost_fingerprint	1	0.0624251	0.263234	-0.200809
Fig. 4b	ADMET	admet	nr_gr	nr_gr	XGB-Feat	xgboost_character	1	0.0408005	0.317322	-0.276521
Fig. 4b	ADMET	admet	nr_ppar_gamma	nr_ppar_gamma	ChemBERTa-3	chemberta3	1	0.0163258	0.0330897	-0.0167639
Fig. 4b	ADMET	admet	nr_ppar_gamma	nr_ppar_gamma	D-MPNN	dmpnn	1	0.214087	0.122871	0.0912164
Fig. 4b	ADMET	admet	nr_ppar_gamma	nr_ppar_gamma	FCNN-FP	fcnn_fingerprint	1	0.000365569	0.0476199	-0.0472543
Fig. 4b	ADMET	admet	nr_ppar_gamma	nr_ppar_gamma	FCNN-Feat	fcnn_character	1	0.046969	0.146536	-0.0995672
Fig. 4b	ADMET	admet	nr_ppar_gamma	nr_ppar_gamma	MolCLR	molclr	1	0.0679171	0.171026	-0.103109
Fig. 4b	ADMET	admet	nr_ppar_gamma	nr_ppar_gamma	XGB-FP	xgboost_fingerprint	1	0.144688	0.289348	-0.144659
Fig. 4b	ADMET	admet	nr_ppar_gamma	nr_ppar_gamma	XGB-Feat	xgboost_character	1	0.082656	0.231479	-0.148823
Fig. 4b	ADMET	admet	nr_tr	nr_tr	ChemBERTa-3	chemberta3	1	0.0539678	0.23141	-0.177443
Fig. 4b	ADMET	admet	nr_tr	nr_tr	D-MPNN	dmpnn	1	0.0144259	0.23091	-0.216484
Fig. 4b	ADMET	admet	nr_tr	nr_tr	FCNN-FP	fcnn_fingerprint	1	0.00660974	0.0800571	-0.0734474
Fig. 4b	ADMET	admet	nr_tr	nr_tr	FCNN-Feat	fcnn_character	1	0.0307048	0.339447	-0.308742
Fig. 4b	ADMET	admet	nr_tr	nr_tr	MolCLR	molclr	1	0.0406836	0.121123	-0.0804398
Fig. 4b	ADMET	admet	nr_tr	nr_tr	XGB-FP	xgboost_fingerprint	1	0.00821224	0.156962	-0.14875
Fig. 4b	ADMET	admet	nr_tr	nr_tr	XGB-Feat	xgboost_character	1	0.0252311	0.345601	-0.32037
Fig. 4b	ADMET	admet	respiratory_tox	respiratory_tox	ChemBERTa-3	chemberta3	1	0.230442	0.494403	-0.263961
Fig. 4b	ADMET	admet	respiratory_tox	respiratory_tox	D-MPNN	dmpnn	1	0.14704	0.562908	-0.415868
Fig. 4b	ADMET	admet	respiratory_tox	respiratory_tox	FCNN-FP	fcnn_fingerprint	1	0.175942	0.543586	-0.367644
Fig. 4b	ADMET	admet	respiratory_tox	respiratory_tox	FCNN-Feat	fcnn_character	1	0.168796	0.478345	-0.309549
Fig. 4b	ADMET	admet	respiratory_tox	respiratory_tox	MolCLR	molclr	1	0.264823	0.386421	-0.121599
Fig. 4b	ADMET	admet	respiratory_tox	respiratory_tox	XGB-FP	xgboost_fingerprint	1	0.185784	0.485984	-0.300199
Fig. 4b	ADMET	admet	respiratory_tox	respiratory_tox	XGB-Feat	xgboost_character	1	0.115688	0.557321	-0.441633
Fig. 4b	ADMET	admet	skin_sens	skin_sens	ChemBERTa-3	chemberta3	1	0.250828	0.292985	-0.042157
Fig. 4b	ADMET	admet	skin_sens	skin_sens	D-MPNN	dmpnn	1	0.144166	0.249739	-0.105573
Fig. 4b	ADMET	admet	skin_sens	skin_sens	FCNN-FP	fcnn_fingerprint	1	0.279392	0.0783793	0.201013
Fig. 4b	ADMET	admet	skin_sens	skin_sens	FCNN-Feat	fcnn_character	1	0.258837	0.153048	0.10579
Fig. 4b	ADMET	admet	skin_sens	skin_sens	MolCLR	molclr	1	-0.0861794	0.21434	-0.30052
Fig. 4b	ADMET	admet	skin_sens	skin_sens	XGB-FP	xgboost_fingerprint	1	0.215957	0.226753	-0.0107963
Fig. 4b	ADMET	admet	skin_sens	skin_sens	XGB-Feat	xgboost_character	1	0.438519	0.368691	0.0698283
Fig. 4b	ADMET	admet	sr_are	sr_are	ChemBERTa-3	chemberta3	1	0.0807282	0.449867	-0.369138
Fig. 4b	ADMET	admet	sr_are	sr_are	D-MPNN	dmpnn	1	0.10693	0.381187	-0.274257
Fig. 4b	ADMET	admet	sr_are	sr_are	FCNN-FP	fcnn_fingerprint	1	0.0408588	0.337765	-0.296906
Fig. 4b	ADMET	admet	sr_are	sr_are	FCNN-Feat	fcnn_character	1	0.0536832	0.450104	-0.396421
Fig. 4b	ADMET	admet	sr_are	sr_are	MolCLR	molclr	1	0.0783268	0.295556	-0.217229
Fig. 4b	ADMET	admet	sr_are	sr_are	XGB-FP	xgboost_fingerprint	1	0.109304	0.377916	-0.268612
Fig. 4b	ADMET	admet	sr_are	sr_are	XGB-Feat	xgboost_character	1	0.0392932	0.383096	-0.343803
Fig. 4b	ADMET	admet	sr_atad5	sr_atad5	ChemBERTa-3	chemberta3	1	0.0465447	0.0496355	-0.00309086
Fig. 4b	ADMET	admet	sr_atad5	sr_atad5	D-MPNN	dmpnn	1	0.0544713	0.268341	-0.213869
Fig. 4b	ADMET	admet	sr_atad5	sr_atad5	FCNN-FP	fcnn_fingerprint	1	0.0656611	0.0908614	-0.0252003
Fig. 4b	ADMET	admet	sr_atad5	sr_atad5	FCNN-Feat	fcnn_character	1	0.185995	0.112927	0.0730678
Fig. 4b	ADMET	admet	sr_atad5	sr_atad5	MolCLR	molclr	1	0.129123	0.165566	-0.0364433
Fig. 4b	ADMET	admet	sr_atad5	sr_atad5	XGB-FP	xgboost_fingerprint	1	0.166388	0.121517	0.0448711
Fig. 4b	ADMET	admet	sr_atad5	sr_atad5	XGB-Feat	xgboost_character	1	0.111828	0.0985057	0.0133222
Fig. 4b	ADMET	admet	sr_hse	sr_hse	ChemBERTa-3	chemberta3	1	0.0729395	0.271621	-0.198681
Fig. 4b	ADMET	admet	sr_hse	sr_hse	D-MPNN	dmpnn	1	0.108439	0.239339	-0.1309
Fig. 4b	ADMET	admet	sr_hse	sr_hse	FCNN-FP	fcnn_fingerprint	1	0.0302588	0.0323791	-0.00212033
Fig. 4b	ADMET	admet	sr_hse	sr_hse	FCNN-Feat	fcnn_character	1	0.0936073	0.267756	-0.174148
Fig. 4b	ADMET	admet	sr_hse	sr_hse	MolCLR	molclr	1	0.0827769	0.219398	-0.136621
Fig. 4b	ADMET	admet	sr_hse	sr_hse	XGB-FP	xgboost_fingerprint	1	0.108364	0.215514	-0.10715
Fig. 4b	ADMET	admet	sr_hse	sr_hse	XGB-Feat	xgboost_character	1	0.0397233	0.213376	-0.173653
Fig. 4b	ADMET	admet	sr_mmp	sr_mmp	ChemBERTa-3	chemberta3	1	0.108022	0.562126	-0.454104
Fig. 4b	ADMET	admet	sr_mmp	sr_mmp	D-MPNN	dmpnn	1	0.0707093	0.564186	-0.493477
Fig. 4b	ADMET	admet	sr_mmp	sr_mmp	FCNN-FP	fcnn_fingerprint	1	0.0320905	0.45165	-0.41956
Fig. 4b	ADMET	admet	sr_mmp	sr_mmp	FCNN-Feat	fcnn_character	1	0.0697789	0.411258	-0.341479
Fig. 4b	ADMET	admet	sr_mmp	sr_mmp	MolCLR	molclr	1	0.0328239	0.494828	-0.462004
Fig. 4b	ADMET	admet	sr_mmp	sr_mmp	XGB-FP	xgboost_fingerprint	1	0.0443478	0.56126	-0.516912
Fig. 4b	ADMET	admet	sr_mmp	sr_mmp	XGB-Feat	xgboost_character	1	0.133692	0.495577	-0.361885
Fig. 4b	ADMET	admet	sr_p53	sr_p53	ChemBERTa-3	chemberta3	1	0.0281394	0.14317	-0.11503
Fig. 4b	ADMET	admet	sr_p53	sr_p53	D-MPNN	dmpnn	1	0.15534	0.386286	-0.230946
Fig. 4b	ADMET	admet	sr_p53	sr_p53	FCNN-FP	fcnn_fingerprint	1	0.0737667	0.380294	-0.306528
Fig. 4b	ADMET	admet	sr_p53	sr_p53	FCNN-Feat	fcnn_character	1	0.141341	0.244681	-0.10334
Fig. 4b	ADMET	admet	sr_p53	sr_p53	MolCLR	molclr	1	0.0967177	0.279557	-0.182839
Fig. 4b	ADMET	admet	sr_p53	sr_p53	XGB-FP	xgboost_fingerprint	1	0.0968867	0.410701	-0.313814
Fig. 4b	ADMET	admet	sr_p53	sr_p53	XGB-Feat	xgboost_character	1	0.0636039	0.359689	-0.296085
Fig. 4b	MoleculeNet	moleculenet	sider	Blood and lymphatic system disorders	ChemBERTa-3	chemberta3	1	0.00798324	0.271748	-0.263765
Fig. 4b	MoleculeNet	moleculenet	sider	Blood and lymphatic system disorders	D-MPNN	dmpnn	1	0.0374554	0.259671	-0.222216
Fig. 4b	MoleculeNet	moleculenet	sider	Blood and lymphatic system disorders	FCNN-FP	fcnn_fingerprint	1	0.085099	0.392775	-0.307676
Fig. 4b	MoleculeNet	moleculenet	sider	Blood and lymphatic system disorders	FCNN-Feat	fcnn_character	1	0.010408	-0.0283311	0.038739
Fig. 4b	MoleculeNet	moleculenet	sider	Blood and lymphatic system disorders	MolCLR	molclr	1	0.213356	0.255013	-0.0416567
Fig. 4b	MoleculeNet	moleculenet	sider	Blood and lymphatic system disorders	XGB-FP	xgboost_fingerprint	1	0.118618	0.322618	-0.203999
Fig. 4b	MoleculeNet	moleculenet	sider	Blood and lymphatic system disorders	XGB-Feat	xgboost_character	1	0.234207	0.210964	0.0232424
Fig. 4b	MoleculeNet	moleculenet	sider	Cardiac disorders	ChemBERTa-3	chemberta3	1	0.0349503	0.361766	-0.326816
Fig. 4b	MoleculeNet	moleculenet	sider	Cardiac disorders	D-MPNN	dmpnn	1	0.0773349	0.405261	-0.327927
Fig. 4b	MoleculeNet	moleculenet	sider	Cardiac disorders	FCNN-FP	fcnn_fingerprint	1	0.111631	0.361248	-0.249617
Fig. 4b	MoleculeNet	moleculenet	sider	Cardiac disorders	FCNN-Feat	fcnn_character	1	0.0396581	0.480545	-0.440887
Fig. 4b	MoleculeNet	moleculenet	sider	Cardiac disorders	MolCLR	molclr	1	-0.0225004	-0.0881011	0.0656007
Fig. 4b	MoleculeNet	moleculenet	sider	Cardiac disorders	XGB-FP	xgboost_fingerprint	1	-0.00419272	0.386874	-0.391067
Fig. 4b	MoleculeNet	moleculenet	sider	Cardiac disorders	XGB-Feat	xgboost_character	1	-0.0120335	0.272869	-0.284902
Fig. 4b	MoleculeNet	moleculenet	sider	Ear and labyrinth disorders	ChemBERTa-3	chemberta3	1	-0.00607521	0.137154	-0.143229
Fig. 4b	MoleculeNet	moleculenet	sider	Ear and labyrinth disorders	D-MPNN	dmpnn	1	0.0159772	0.228498	-0.21252
Fig. 4b	MoleculeNet	moleculenet	sider	Ear and labyrinth disorders	FCNN-FP	fcnn_fingerprint	1	0.00684666	0.281971	-0.275125
Fig. 4b	MoleculeNet	moleculenet	sider	Ear and labyrinth disorders	FCNN-Feat	fcnn_character	1	-0.0250478	-0.00289596	-0.0221519
Fig. 4b	MoleculeNet	moleculenet	sider	Ear and labyrinth disorders	MolCLR	molclr	1	0.0213525	0.0753932	-0.0540406
Fig. 4b	MoleculeNet	moleculenet	sider	Ear and labyrinth disorders	XGB-FP	xgboost_fingerprint	1	0.0163753	0.183775	-0.1674
Fig. 4b	MoleculeNet	moleculenet	sider	Ear and labyrinth disorders	XGB-Feat	xgboost_character	1	0.0865361	0.0343535	0.0521826
Fig. 4b	MoleculeNet	moleculenet	sider	Endocrine disorders	ChemBERTa-3	chemberta3	1	-0.0149874	0.132983	-0.147971
Fig. 4b	MoleculeNet	moleculenet	sider	Endocrine disorders	D-MPNN	dmpnn	1	0.139229	0.118826	0.020402
Fig. 4b	MoleculeNet	moleculenet	sider	Endocrine disorders	FCNN-FP	fcnn_fingerprint	1	0.046494	0.109149	-0.0626548
Fig. 4b	MoleculeNet	moleculenet	sider	Endocrine disorders	FCNN-Feat	fcnn_character	1	-0.0128228	0.119322	-0.132145
Fig. 4b	MoleculeNet	moleculenet	sider	Endocrine disorders	MolCLR	molclr	1	0.0197755	0.0711623	-0.0513869
Fig. 4b	MoleculeNet	moleculenet	sider	Endocrine disorders	XGB-FP	xgboost_fingerprint	1	0.147964	0.195427	-0.0474626
Fig. 4b	MoleculeNet	moleculenet	sider	Endocrine disorders	XGB-Feat	xgboost_character	1	0.000693654	0.170732	-0.170038
Fig. 4b	MoleculeNet	moleculenet	sider	Eye disorders	ChemBERTa-3	chemberta3	1	0.0528584	0.129008	-0.0761498
Fig. 4b	MoleculeNet	moleculenet	sider	Eye disorders	D-MPNN	dmpnn	1	-0.0612496	0.0610695	-0.122319
Fig. 4b	MoleculeNet	moleculenet	sider	Eye disorders	FCNN-FP	fcnn_fingerprint	1	0.0171986	0.0500184	-0.0328198
Fig. 4b	MoleculeNet	moleculenet	sider	Eye disorders	FCNN-Feat	fcnn_character	1	-0.0946221	0.1091	-0.203722
Fig. 4b	MoleculeNet	moleculenet	sider	Eye disorders	MolCLR	molclr	1	0.0764878	0.0949694	-0.0184816
Fig. 4b	MoleculeNet	moleculenet	sider	Eye disorders	XGB-FP	xgboost_fingerprint	1	0.04265	0.129336	-0.0866861
Fig. 4b	MoleculeNet	moleculenet	sider	Eye disorders	XGB-Feat	xgboost_character	1	0.184346	0.129663	0.0546832
Fig. 4b	MoleculeNet	moleculenet	sider	Gastrointestinal disorders	ChemBERTa-3	chemberta3	1	0.35989	0.609776	-0.249887
Fig. 4b	MoleculeNet	moleculenet	sider	Gastrointestinal disorders	D-MPNN	dmpnn	1	0.0912845	0.472987	-0.381702
Fig. 4b	MoleculeNet	moleculenet	sider	Gastrointestinal disorders	FCNN-FP	fcnn_fingerprint	1	0.352002	0.584277	-0.232275
Fig. 4b	MoleculeNet	moleculenet	sider	Gastrointestinal disorders	FCNN-Feat	fcnn_character	1	-0.0752032	0.211089	-0.286292
Fig. 4b	MoleculeNet	moleculenet	sider	Gastrointestinal disorders	MolCLR	molclr	1	0.205361	0.4575	-0.252139
Fig. 4b	MoleculeNet	moleculenet	sider	Gastrointestinal disorders	XGB-FP	xgboost_fingerprint	1	0.241215	0.41357	-0.172355
Fig. 4b	MoleculeNet	moleculenet	sider	Gastrointestinal disorders	XGB-Feat	xgboost_character	1	0.238553	0.605831	-0.367278
Fig. 4b	MoleculeNet	moleculenet	sider	Hepatobiliary disorders	ChemBERTa-3	chemberta3	1	0.0675689	0.209322	-0.141753
Fig. 4b	MoleculeNet	moleculenet	sider	Hepatobiliary disorders	D-MPNN	dmpnn	1	-0.0261244	0.175244	-0.201369
Fig. 4b	MoleculeNet	moleculenet	sider	Hepatobiliary disorders	FCNN-FP	fcnn_fingerprint	1	0.058007	0.219601	-0.161594
Fig. 4b	MoleculeNet	moleculenet	sider	Hepatobiliary disorders	FCNN-Feat	fcnn_character	1	-0.0305084	0.0889707	-0.119479
Fig. 4b	MoleculeNet	moleculenet	sider	Hepatobiliary disorders	MolCLR	molclr	1	0.00737852	0.20444	-0.197061
Fig. 4b	MoleculeNet	moleculenet	sider	Hepatobiliary disorders	XGB-FP	xgboost_fingerprint	1	-0.0126448	0.201959	-0.214604
Fig. 4b	MoleculeNet	moleculenet	sider	Hepatobiliary disorders	XGB-Feat	xgboost_character	1	-0.0608822	0.0933095	-0.154192
Fig. 4b	MoleculeNet	moleculenet	sider	Immune system disorders	ChemBERTa-3	chemberta3	1	0.10871	0.347381	-0.238671
Fig. 4b	MoleculeNet	moleculenet	sider	Immune system disorders	D-MPNN	dmpnn	1	-0.108851	0.131418	-0.240269
Fig. 4b	MoleculeNet	moleculenet	sider	Immune system disorders	FCNN-FP	fcnn_fingerprint	1	0.25667	0.36737	-0.110699
Fig. 4b	MoleculeNet	moleculenet	sider	Immune system disorders	FCNN-Feat	fcnn_character	1	-0.177563	0.206903	-0.384466
Fig. 4b	MoleculeNet	moleculenet	sider	Immune system disorders	MolCLR	molclr	1	0.0988924	0.0136914	0.085201
Fig. 4b	MoleculeNet	moleculenet	sider	Immune system disorders	XGB-FP	xgboost_fingerprint	1	0.106918	0.269811	-0.162893
Fig. 4b	MoleculeNet	moleculenet	sider	Immune system disorders	XGB-Feat	xgboost_character	1	0.101672	0.315849	-0.214177
Fig. 4b	MoleculeNet	moleculenet	sider	Injury, poisoning and procedural complications	ChemBERTa-3	chemberta3	1	0.212317	0.263638	-0.0513209
Fig. 4b	MoleculeNet	moleculenet	sider	Injury, poisoning and procedural complications	D-MPNN	dmpnn	1	0.0560678	0.0838092	-0.0277415
Fig. 4b	MoleculeNet	moleculenet	sider	Injury, poisoning and procedural complications	FCNN-FP	fcnn_fingerprint	1	0.0752557	0.169335	-0.094079
Fig. 4b	MoleculeNet	moleculenet	sider	Injury, poisoning and procedural complications	FCNN-Feat	fcnn_character	1	0.13324	0.0522131	0.081027
Fig. 4b	MoleculeNet	moleculenet	sider	Injury, poisoning and procedural complications	MolCLR	molclr	1	0.0319496	0.0545488	-0.0225993
Fig. 4b	MoleculeNet	moleculenet	sider	Injury, poisoning and procedural complications	XGB-FP	xgboost_fingerprint	1	0.185224	0.161848	0.0233759
Fig. 4b	MoleculeNet	moleculenet	sider	Injury, poisoning and procedural complications	XGB-Feat	xgboost_character	1	0.0943718	0.140669	-0.0462971
Fig. 4b	MoleculeNet	moleculenet	sider	Metabolism and nutrition disorders	ChemBERTa-3	chemberta3	1	0.0233929	0.339951	-0.316558
Fig. 4b	MoleculeNet	moleculenet	sider	Metabolism and nutrition disorders	D-MPNN	dmpnn	1	0.0686448	0.0313235	0.0373213
Fig. 4b	MoleculeNet	moleculenet	sider	Metabolism and nutrition disorders	FCNN-FP	fcnn_fingerprint	1	-0.0108343	0.320343	-0.331177
Fig. 4b	MoleculeNet	moleculenet	sider	Metabolism and nutrition disorders	FCNN-Feat	fcnn_character	1	0.0568888	-0.0460203	0.102909
Fig. 4b	MoleculeNet	moleculenet	sider	Metabolism and nutrition disorders	MolCLR	molclr	1	-0.0568171	0.343126	-0.399943
Fig. 4b	MoleculeNet	moleculenet	sider	Metabolism and nutrition disorders	XGB-FP	xgboost_fingerprint	1	0.0191202	0.268474	-0.249353
Fig. 4b	MoleculeNet	moleculenet	sider	Metabolism and nutrition disorders	XGB-Feat	xgboost_character	1	0.193118	0.102421	0.0906974
Fig. 4b	MoleculeNet	moleculenet	sider	Musculoskeletal and connective tissue disorders	ChemBERTa-3	chemberta3	1	0.0823625	0.249993	-0.16763
Fig. 4b	MoleculeNet	moleculenet	sider	Musculoskeletal and connective tissue disorders	D-MPNN	dmpnn	1	-0.0492822	0.0527669	-0.102049
Fig. 4b	MoleculeNet	moleculenet	sider	Musculoskeletal and connective tissue disorders	FCNN-FP	fcnn_fingerprint	1	0.141581	0.317149	-0.175568
Fig. 4b	MoleculeNet	moleculenet	sider	Musculoskeletal and connective tissue disorders	FCNN-Feat	fcnn_character	1	0.131223	0.275189	-0.143966
Fig. 4b	MoleculeNet	moleculenet	sider	Musculoskeletal and connective tissue disorders	MolCLR	molclr	1	-0.100203	0.240701	-0.340905
Fig. 4b	MoleculeNet	moleculenet	sider	Musculoskeletal and connective tissue disorders	XGB-FP	xgboost_fingerprint	1	0.0631582	0.236495	-0.173337
Fig. 4b	MoleculeNet	moleculenet	sider	Musculoskeletal and connective tissue disorders	XGB-Feat	xgboost_character	1	-0.0303921	0.202154	-0.232546
Fig. 4b	MoleculeNet	moleculenet	sider	Nervous system disorders	ChemBERTa-3	chemberta3	1	0.257992	0.278848	-0.0208563
Fig. 4b	MoleculeNet	moleculenet	sider	Nervous system disorders	D-MPNN	dmpnn	1	-0.116782	-0.0232891	-0.0934932
Fig. 4b	MoleculeNet	moleculenet	sider	Nervous system disorders	FCNN-FP	fcnn_fingerprint	1	0.331178	0.364551	-0.0333726
Fig. 4b	MoleculeNet	moleculenet	sider	Nervous system disorders	FCNN-Feat	fcnn_character	1	-0.0702969	0.233903	-0.3042
Fig. 4b	MoleculeNet	moleculenet	sider	Nervous system disorders	MolCLR	molclr	1	-0.00786785	0.0757589	-0.0836267
Fig. 4b	MoleculeNet	moleculenet	sider	Nervous system disorders	XGB-FP	xgboost_fingerprint	1	0.115771	0.340452	-0.224681
Fig. 4b	MoleculeNet	moleculenet	sider	Nervous system disorders	XGB-Feat	xgboost_character	1	0.191779	0.274745	-0.0829662
Fig. 4b	MoleculeNet	moleculenet	sider	Renal and urinary disorders	ChemBERTa-3	chemberta3	1	0.105242	0.287767	-0.182524
Fig. 4b	MoleculeNet	moleculenet	sider	Renal and urinary disorders	D-MPNN	dmpnn	1	0.0220547	0.215167	-0.193112
Fig. 4b	MoleculeNet	moleculenet	sider	Renal and urinary disorders	FCNN-FP	fcnn_fingerprint	1	0.16757	0.324057	-0.156486
Fig. 4b	MoleculeNet	moleculenet	sider	Renal and urinary disorders	FCNN-Feat	fcnn_character	1	-0.0615951	0.0922025	-0.153798
Fig. 4b	MoleculeNet	moleculenet	sider	Renal and urinary disorders	MolCLR	molclr	1	0.0215068	0.291186	-0.269679
Fig. 4b	MoleculeNet	moleculenet	sider	Renal and urinary disorders	XGB-FP	xgboost_fingerprint	1	0.167592	0.388357	-0.220765
Fig. 4b	MoleculeNet	moleculenet	sider	Renal and urinary disorders	XGB-Feat	xgboost_character	1	0.0959265	0.299268	-0.203341
Fig. 4b	MoleculeNet	moleculenet	sider	Reproductive system and breast disorders	ChemBERTa-3	chemberta3	1	0.0730558	0.259536	-0.186481
Fig. 4b	MoleculeNet	moleculenet	sider	Reproductive system and breast disorders	D-MPNN	dmpnn	1	-0.0479711	0.128178	-0.176149
Fig. 4b	MoleculeNet	moleculenet	sider	Reproductive system and breast disorders	FCNN-FP	fcnn_fingerprint	1	0.014814	0.259421	-0.244607
Fig. 4b	MoleculeNet	moleculenet	sider	Reproductive system and breast disorders	FCNN-Feat	fcnn_character	1	0.082435	0.233909	-0.151474
Fig. 4b	MoleculeNet	moleculenet	sider	Reproductive system and breast disorders	MolCLR	molclr	1	0.0538199	0.130384	-0.0765643
Fig. 4b	MoleculeNet	moleculenet	sider	Reproductive system and breast disorders	XGB-FP	xgboost_fingerprint	1	0.0335134	0.252106	-0.218592
Fig. 4b	MoleculeNet	moleculenet	sider	Reproductive system and breast disorders	XGB-Feat	xgboost_character	1	0.0172741	0.181947	-0.164673
Fig. 4b	MoleculeNet	moleculenet	sider	Respiratory, thoracic and mediastinal disorders	ChemBERTa-3	chemberta3	1	0.130176	0.24828	-0.118103
Fig. 4b	MoleculeNet	moleculenet	sider	Respiratory, thoracic and mediastinal disorders	D-MPNN	dmpnn	1	-0.10836	0.197607	-0.305967
Fig. 4b	MoleculeNet	moleculenet	sider	Respiratory, thoracic and mediastinal disorders	FCNN-FP	fcnn_fingerprint	1	0.314684	0.262202	0.0524823
Fig. 4b	MoleculeNet	moleculenet	sider	Respiratory, thoracic and mediastinal disorders	FCNN-Feat	fcnn_character	1	0.219876	0.411027	-0.191151
Fig. 4b	MoleculeNet	moleculenet	sider	Respiratory, thoracic and mediastinal disorders	MolCLR	molclr	1	0.331028	0.106711	0.224317
Fig. 4b	MoleculeNet	moleculenet	sider	Respiratory, thoracic and mediastinal disorders	XGB-FP	xgboost_fingerprint	1	0.231318	0.271734	-0.0404161
Fig. 4b	MoleculeNet	moleculenet	sider	Respiratory, thoracic and mediastinal disorders	XGB-Feat	xgboost_character	1	0.209242	0.182342	0.0268992
Fig. 4b	MoleculeNet	moleculenet	sider	Skin and subcutaneous tissue disorders	ChemBERTa-3	chemberta3	1	0.220266	-0.158927	0.379193
Fig. 4b	MoleculeNet	moleculenet	sider	Skin and subcutaneous tissue disorders	D-MPNN	dmpnn	1	-0.127775	-0.27115	0.143375
Fig. 4b	MoleculeNet	moleculenet	sider	Skin and subcutaneous tissue disorders	FCNN-FP	fcnn_fingerprint	1	0.309828	0.277148	0.0326801
Fig. 4b	MoleculeNet	moleculenet	sider	Skin and subcutaneous tissue disorders	FCNN-Feat	fcnn_character	1	-0.351468	-0.0668606	-0.284607
Fig. 4b	MoleculeNet	moleculenet	sider	Skin and subcutaneous tissue disorders	MolCLR	molclr	1	-0.0698679	-0.769351	0.699483
Fig. 4b	MoleculeNet	moleculenet	sider	Skin and subcutaneous tissue disorders	XGB-FP	xgboost_fingerprint	1	0.339111	0.24924	0.0898714
Fig. 4b	MoleculeNet	moleculenet	sider	Skin and subcutaneous tissue disorders	XGB-Feat	xgboost_character	1	0.236818	-0.114249	0.351067
Fig. 4b	MoleculeNet	moleculenet	sider	Vascular disorders	ChemBERTa-3	chemberta3	1	0.00687785	0.351943	-0.345065
Fig. 4b	MoleculeNet	moleculenet	sider	Vascular disorders	D-MPNN	dmpnn	1	-0.0814689	-0.0404116	-0.0410572
Fig. 4b	MoleculeNet	moleculenet	sider	Vascular disorders	FCNN-FP	fcnn_fingerprint	1	0.175054	0.288308	-0.113254
Fig. 4b	MoleculeNet	moleculenet	sider	Vascular disorders	FCNN-Feat	fcnn_character	1	0.0800462	0.457256	-0.377209
Fig. 4b	MoleculeNet	moleculenet	sider	Vascular disorders	MolCLR	molclr	1	-0.223338	-0.123167	-0.100171
Fig. 4b	MoleculeNet	moleculenet	sider	Vascular disorders	XGB-FP	xgboost_fingerprint	1	0.0876667	0.313166	-0.2255
Fig. 4b	MoleculeNet	moleculenet	sider	Vascular disorders	XGB-Feat	xgboost_character	1	-0.035363	0.181717	-0.21708
Fig. 4b	MoleculeNet	moleculenet	tox21	NR-AR	ChemBERTa-3	chemberta3	1	0.00975518	0.206478	-0.196722
Fig. 4b	MoleculeNet	moleculenet	tox21	NR-AR	D-MPNN	dmpnn	1	0.000218954	0.360844	-0.360625
Fig. 4b	MoleculeNet	moleculenet	tox21	NR-AR	FCNN-FP	fcnn_fingerprint	1	-0.00184413	0.410173	-0.412017
Fig. 4b	MoleculeNet	moleculenet	tox21	NR-AR	FCNN-Feat	fcnn_character	1	0.0639059	0.408831	-0.344925
Fig. 4b	MoleculeNet	moleculenet	tox21	NR-AR	MolCLR	molclr	1	0.00252473	0.360976	-0.358451
Fig. 4b	MoleculeNet	moleculenet	tox21	NR-AR	XGB-FP	xgboost_fingerprint	1	0.00203705	0.359541	-0.357504
Fig. 4b	MoleculeNet	moleculenet	tox21	NR-AR	XGB-Feat	xgboost_character	1	-0.000408327	0.456566	-0.456974
Fig. 4b	MoleculeNet	moleculenet	tox21	NR-AR-LBD	ChemBERTa-3	chemberta3	1	0.0376165	0.0902524	-0.0526359
Fig. 4b	MoleculeNet	moleculenet	tox21	NR-AR-LBD	D-MPNN	dmpnn	1	0.0151214	0.20193	-0.186809
Fig. 4b	MoleculeNet	moleculenet	tox21	NR-AR-LBD	FCNN-FP	fcnn_fingerprint	1	0.00691763	0.14477	-0.137853
Fig. 4b	MoleculeNet	moleculenet	tox21	NR-AR-LBD	FCNN-Feat	fcnn_character	1	0.00288182	0.0593498	-0.056468
Fig. 4b	MoleculeNet	moleculenet	tox21	NR-AR-LBD	MolCLR	molclr	1	0.00419957	0.102082	-0.0978825
Fig. 4b	MoleculeNet	moleculenet	tox21	NR-AR-LBD	XGB-FP	xgboost_fingerprint	1	0.0051897	0.180356	-0.175166
Fig. 4b	MoleculeNet	moleculenet	tox21	NR-AR-LBD	XGB-Feat	xgboost_character	1	0.0117599	0.276109	-0.264349
Fig. 4b	MoleculeNet	moleculenet	tox21	NR-AhR	ChemBERTa-3	chemberta3	1	0.118841	0.547041	-0.4282
Fig. 4b	MoleculeNet	moleculenet	tox21	NR-AhR	D-MPNN	dmpnn	1	0.0198525	0.515389	-0.495537
Fig. 4b	MoleculeNet	moleculenet	tox21	NR-AhR	FCNN-FP	fcnn_fingerprint	1	0.0191159	0.560164	-0.541048
Fig. 4b	MoleculeNet	moleculenet	tox21	NR-AhR	FCNN-Feat	fcnn_character	1	0.054969	0.505	-0.450031
Fig. 4b	MoleculeNet	moleculenet	tox21	NR-AhR	MolCLR	molclr	1	0.109038	0.599586	-0.490548
Fig. 4b	MoleculeNet	moleculenet	tox21	NR-AhR	XGB-FP	xgboost_fingerprint	1	0.01772	0.568709	-0.550989
Fig. 4b	MoleculeNet	moleculenet	tox21	NR-AhR	XGB-Feat	xgboost_character	1	0.0411941	0.444961	-0.403767
Fig. 4b	MoleculeNet	moleculenet	tox21	NR-Aromatase	ChemBERTa-3	chemberta3	1	0.0243859	0.343962	-0.319576
Fig. 4b	MoleculeNet	moleculenet	tox21	NR-Aromatase	D-MPNN	dmpnn	1	0.0474295	0.295602	-0.248173
Fig. 4b	MoleculeNet	moleculenet	tox21	NR-Aromatase	FCNN-FP	fcnn_fingerprint	1	0.00304007	0.169231	-0.166191
Fig. 4b	MoleculeNet	moleculenet	tox21	NR-Aromatase	FCNN-Feat	fcnn_character	1	0.0121424	0.138701	-0.126559
Fig. 4b	MoleculeNet	moleculenet	tox21	NR-Aromatase	MolCLR	molclr	1	0.000144212	0.301421	-0.301277
Fig. 4b	MoleculeNet	moleculenet	tox21	NR-Aromatase	XGB-FP	xgboost_fingerprint	1	0.00775746	0.377729	-0.369971
Fig. 4b	MoleculeNet	moleculenet	tox21	NR-Aromatase	XGB-Feat	xgboost_character	1	0.0117696	0.19811	-0.18634
Fig. 4b	MoleculeNet	moleculenet	tox21	NR-ER	ChemBERTa-3	chemberta3	1	0.016216	0.303161	-0.286945
Fig. 4b	MoleculeNet	moleculenet	tox21	NR-ER	D-MPNN	dmpnn	1	0.0227773	0.178772	-0.155995
Fig. 4b	MoleculeNet	moleculenet	tox21	NR-ER	FCNN-FP	fcnn_fingerprint	1	0.00598989	0.260566	-0.254576
Fig. 4b	MoleculeNet	moleculenet	tox21	NR-ER	FCNN-Feat	fcnn_character	1	-0.00181676	0.272888	-0.274704
Fig. 4b	MoleculeNet	moleculenet	tox21	NR-ER	MolCLR	molclr	1	0.028453	-0.0147973	0.0432504
Fig. 4b	MoleculeNet	moleculenet	tox21	NR-ER	XGB-FP	xgboost_fingerprint	1	0.00108133	0.196597	-0.195516
Fig. 4b	MoleculeNet	moleculenet	tox21	NR-ER	XGB-Feat	xgboost_character	1	-0.00278756	0.227135	-0.229923
Fig. 4b	MoleculeNet	moleculenet	tox21	NR-ER-LBD	ChemBERTa-3	chemberta3	1	0.0231727	0.477839	-0.454666
Fig. 4b	MoleculeNet	moleculenet	tox21	NR-ER-LBD	D-MPNN	dmpnn	1	0.000721767	0.202823	-0.202101
Fig. 4b	MoleculeNet	moleculenet	tox21	NR-ER-LBD	FCNN-FP	fcnn_fingerprint	1	0.0162489	0.341955	-0.325706
Fig. 4b	MoleculeNet	moleculenet	tox21	NR-ER-LBD	FCNN-Feat	fcnn_character	1	0.038617	0.344428	-0.305811
Fig. 4b	MoleculeNet	moleculenet	tox21	NR-ER-LBD	MolCLR	molclr	1	0.00950817	0.142703	-0.133195
Fig. 4b	MoleculeNet	moleculenet	tox21	NR-ER-LBD	XGB-FP	xgboost_fingerprint	1	0.027825	0.298225	-0.2704
Fig. 4b	MoleculeNet	moleculenet	tox21	NR-ER-LBD	XGB-Feat	xgboost_character	1	0.026452	0.400487	-0.374035
Fig. 4b	MoleculeNet	moleculenet	tox21	NR-PPAR-gamma	ChemBERTa-3	chemberta3	1	0.00474031	0.495667	-0.490927
Fig. 4b	MoleculeNet	moleculenet	tox21	NR-PPAR-gamma	D-MPNN	dmpnn	1	0.00934995	0.376529	-0.367179
Fig. 4b	MoleculeNet	moleculenet	tox21	NR-PPAR-gamma	FCNN-FP	fcnn_fingerprint	1	-0.00335468	0.0870142	-0.0903689
Fig. 4b	MoleculeNet	moleculenet	tox21	NR-PPAR-gamma	FCNN-Feat	fcnn_character	1	0.0128793	0.250473	-0.237594
Fig. 4b	MoleculeNet	moleculenet	tox21	NR-PPAR-gamma	MolCLR	molclr	1	0.00701169	0.136055	-0.129043
Fig. 4b	MoleculeNet	moleculenet	tox21	NR-PPAR-gamma	XGB-FP	xgboost_fingerprint	1	0.00236516	0.314671	-0.312306
Fig. 4b	MoleculeNet	moleculenet	tox21	NR-PPAR-gamma	XGB-Feat	xgboost_character	1	0.0099941	0.32323	-0.313236
Fig. 4b	MoleculeNet	moleculenet	tox21	SR-ARE	ChemBERTa-3	chemberta3	1	0.0348337	0.494142	-0.459309
Fig. 4b	MoleculeNet	moleculenet	tox21	SR-ARE	D-MPNN	dmpnn	1	0.0824479	0.385386	-0.302938
Fig. 4b	MoleculeNet	moleculenet	tox21	SR-ARE	FCNN-FP	fcnn_fingerprint	1	0.0236721	0.338932	-0.315259
Fig. 4b	MoleculeNet	moleculenet	tox21	SR-ARE	FCNN-Feat	fcnn_character	1	0.0580355	0.445485	-0.38745
Fig. 4b	MoleculeNet	moleculenet	tox21	SR-ARE	MolCLR	molclr	1	0.0585366	0.405437	-0.346901
Fig. 4b	MoleculeNet	moleculenet	tox21	SR-ARE	XGB-FP	xgboost_fingerprint	1	0.0593188	0.264758	-0.205439
Fig. 4b	MoleculeNet	moleculenet	tox21	SR-ARE	XGB-Feat	xgboost_character	1	0.05907	0.490872	-0.431803
Fig. 4b	MoleculeNet	moleculenet	tox21	SR-ATAD5	ChemBERTa-3	chemberta3	1	0.0272982	0.146443	-0.119144
Fig. 4b	MoleculeNet	moleculenet	tox21	SR-ATAD5	D-MPNN	dmpnn	1	0.105889	0.163867	-0.0579779
Fig. 4b	MoleculeNet	moleculenet	tox21	SR-ATAD5	FCNN-FP	fcnn_fingerprint	1	0.01252	0.165329	-0.152809
Fig. 4b	MoleculeNet	moleculenet	tox21	SR-ATAD5	FCNN-Feat	fcnn_character	1	0.0388428	0.141774	-0.102931
Fig. 4b	MoleculeNet	moleculenet	tox21	SR-ATAD5	MolCLR	molclr	1	0.115856	0.144083	-0.0282276
Fig. 4b	MoleculeNet	moleculenet	tox21	SR-ATAD5	XGB-FP	xgboost_fingerprint	1	0.0310978	0.161175	-0.130077
Fig. 4b	MoleculeNet	moleculenet	tox21	SR-ATAD5	XGB-Feat	xgboost_character	1	0.0955794	0.173714	-0.0781348
Fig. 4b	MoleculeNet	moleculenet	tox21	SR-HSE	ChemBERTa-3	chemberta3	1	0.139336	0.369391	-0.230055
Fig. 4b	MoleculeNet	moleculenet	tox21	SR-HSE	D-MPNN	dmpnn	1	0.186343	0.203964	-0.0176212
Fig. 4b	MoleculeNet	moleculenet	tox21	SR-HSE	FCNN-FP	fcnn_fingerprint	1	0.0172252	0.195922	-0.178697
Fig. 4b	MoleculeNet	moleculenet	tox21	SR-HSE	FCNN-Feat	fcnn_character	1	0.146667	0.435402	-0.288734
Fig. 4b	MoleculeNet	moleculenet	tox21	SR-HSE	MolCLR	molclr	1	-0.00169583	0.00941631	-0.0111121
Fig. 4b	MoleculeNet	moleculenet	tox21	SR-HSE	XGB-FP	xgboost_fingerprint	1	0.0449795	0.205903	-0.160924
Fig. 4b	MoleculeNet	moleculenet	tox21	SR-HSE	XGB-Feat	xgboost_character	1	0.0732331	0.253769	-0.180536
Fig. 4b	MoleculeNet	moleculenet	tox21	SR-MMP	ChemBERTa-3	chemberta3	1	0.0851625	0.700165	-0.615003
Fig. 4b	MoleculeNet	moleculenet	tox21	SR-MMP	D-MPNN	dmpnn	1	0.0542522	0.53173	-0.477478
Fig. 4b	MoleculeNet	moleculenet	tox21	SR-MMP	FCNN-FP	fcnn_fingerprint	1	0.0236067	0.535315	-0.511708
Fig. 4b	MoleculeNet	moleculenet	tox21	SR-MMP	FCNN-Feat	fcnn_character	1	0.053582	0.57721	-0.523628
Fig. 4b	MoleculeNet	moleculenet	tox21	SR-MMP	MolCLR	molclr	1	0.162269	0.530847	-0.368578
Fig. 4b	MoleculeNet	moleculenet	tox21	SR-MMP	XGB-FP	xgboost_fingerprint	1	0.0257481	0.470094	-0.444346
Fig. 4b	MoleculeNet	moleculenet	tox21	SR-MMP	XGB-Feat	xgboost_character	1	0.155425	0.739031	-0.583606
Fig. 4b	MoleculeNet	moleculenet	tox21	SR-p53	ChemBERTa-3	chemberta3	1	0.0172921	0.265271	-0.247979
Fig. 4b	MoleculeNet	moleculenet	tox21	SR-p53	D-MPNN	dmpnn	1	0.00262897	0.336539	-0.33391
Fig. 4b	MoleculeNet	moleculenet	tox21	SR-p53	FCNN-FP	fcnn_fingerprint	1	0.0150145	0.193309	-0.178294
Fig. 4b	MoleculeNet	moleculenet	tox21	SR-p53	FCNN-Feat	fcnn_character	1	0.049305	0.308183	-0.258878
Fig. 4b	MoleculeNet	moleculenet	tox21	SR-p53	MolCLR	molclr	1	0.00994743	0.27152	-0.261573
Fig. 4b	MoleculeNet	moleculenet	tox21	SR-p53	XGB-FP	xgboost_fingerprint	1	0.00912427	0.387219	-0.378095
Fig. 4b	MoleculeNet	moleculenet	tox21	SR-p53	XGB-Feat	xgboost_character	1	0.00978814	0.341475	-0.331687
Fig. 4b	MoleculeNet	moleculenet	toxcast	APR_HepG2_CellLoss_24h_dn	ChemBERTa-3	chemberta3	1	0.148797	0.357595	-0.208798
Fig. 4b	MoleculeNet	moleculenet	toxcast	APR_HepG2_CellLoss_24h_dn	D-MPNN	dmpnn	1	0.136555	0.124548	0.0120068
Fig. 4b	MoleculeNet	moleculenet	toxcast	APR_HepG2_CellLoss_24h_dn	FCNN-FP	fcnn_fingerprint	1	0.00940319	0.160055	-0.150652
Fig. 4b	MoleculeNet	moleculenet	toxcast	APR_HepG2_CellLoss_24h_dn	FCNN-Feat	fcnn_character	1	0.223133	0.492887	-0.269755
Fig. 4b	MoleculeNet	moleculenet	toxcast	APR_HepG2_CellLoss_24h_dn	MolCLR	molclr	1	0.0861549	0.123991	-0.0378363
Fig. 4b	MoleculeNet	moleculenet	toxcast	APR_HepG2_CellLoss_24h_dn	XGB-FP	xgboost_fingerprint	1	0.0571226	0.0861928	-0.0290702
Fig. 4b	MoleculeNet	moleculenet	toxcast	APR_HepG2_CellLoss_24h_dn	XGB-Feat	xgboost_character	1	0.366234	0.34253	0.0237048
Fig. 4b	MoleculeNet	moleculenet	toxcast	APR_HepG2_MitoMembPot_24h_dn	ChemBERTa-3	chemberta3	1	0.00206417	0.444957	-0.442893
Fig. 4b	MoleculeNet	moleculenet	toxcast	APR_HepG2_MitoMembPot_24h_dn	D-MPNN	dmpnn	1	0.0126843	0.49259	-0.479906
Fig. 4b	MoleculeNet	moleculenet	toxcast	APR_HepG2_MitoMembPot_24h_dn	FCNN-FP	fcnn_fingerprint	1	0.0596573	0.329393	-0.269735
Fig. 4b	MoleculeNet	moleculenet	toxcast	APR_HepG2_MitoMembPot_24h_dn	FCNN-Feat	fcnn_character	1	0.0455471	0.306858	-0.261311
Fig. 4b	MoleculeNet	moleculenet	toxcast	APR_HepG2_MitoMembPot_24h_dn	MolCLR	molclr	1	-0.00460486	0.173698	-0.178303
Fig. 4b	MoleculeNet	moleculenet	toxcast	APR_HepG2_MitoMembPot_24h_dn	XGB-FP	xgboost_fingerprint	1	-0.0103732	0.330608	-0.340982
Fig. 4b	MoleculeNet	moleculenet	toxcast	APR_HepG2_MitoMembPot_24h_dn	XGB-Feat	xgboost_character	1	0.0307973	0.305953	-0.275155
Fig. 4b	MoleculeNet	moleculenet	toxcast	APR_HepG2_OxidativeStress_24h_up	ChemBERTa-3	chemberta3	1	0.116213	0.103317	0.0128952
Fig. 4b	MoleculeNet	moleculenet	toxcast	APR_HepG2_OxidativeStress_24h_up	D-MPNN	dmpnn	1	0.0481851	0.114589	-0.0664038
Fig. 4b	MoleculeNet	moleculenet	toxcast	APR_HepG2_OxidativeStress_24h_up	FCNN-FP	fcnn_fingerprint	1	0.0471673	0.0987995	-0.0516322
Fig. 4b	MoleculeNet	moleculenet	toxcast	APR_HepG2_OxidativeStress_24h_up	FCNN-Feat	fcnn_character	1	0.145662	0.244982	-0.09932
Fig. 4b	MoleculeNet	moleculenet	toxcast	APR_HepG2_OxidativeStress_24h_up	MolCLR	molclr	1	0.141694	0.100725	0.0409692
Fig. 4b	MoleculeNet	moleculenet	toxcast	APR_HepG2_OxidativeStress_24h_up	XGB-FP	xgboost_fingerprint	1	0.0823068	0.050177	0.0321298
Fig. 4b	MoleculeNet	moleculenet	toxcast	APR_HepG2_OxidativeStress_24h_up	XGB-Feat	xgboost_character	1	0.227148	0.254102	-0.026954
Fig. 4b	MoleculeNet	moleculenet	toxcast	NVS_NR_hER	ChemBERTa-3	chemberta3	1	0.0295268	0.724955	-0.695428
Fig. 4b	MoleculeNet	moleculenet	toxcast	NVS_NR_hER	D-MPNN	dmpnn	1	0.0431704	0.638313	-0.595143
Fig. 4b	MoleculeNet	moleculenet	toxcast	NVS_NR_hER	FCNN-FP	fcnn_fingerprint	1	-0.0140902	0.619913	-0.634003
Fig. 4b	MoleculeNet	moleculenet	toxcast	NVS_NR_hER	FCNN-Feat	fcnn_character	1	-0.0136693	0.359221	-0.372891
Fig. 4b	MoleculeNet	moleculenet	toxcast	NVS_NR_hER	MolCLR	molclr	1	0.010162	0.696881	-0.686719
Fig. 4b	MoleculeNet	moleculenet	toxcast	NVS_NR_hER	XGB-FP	xgboost_fingerprint	1	-0.00985322	0.672211	-0.682064
Fig. 4b	MoleculeNet	moleculenet	toxcast	NVS_NR_hER	XGB-Feat	xgboost_character	1	0.0353217	0.503422	-0.4681
Fig. 4b	MoleculeNet	moleculenet	toxcast	NVS_NR_hPPARg	ChemBERTa-3	chemberta3	1	0.16698	0.249471	-0.0824914
Fig. 4b	MoleculeNet	moleculenet	toxcast	NVS_NR_hPPARg	D-MPNN	dmpnn	1	0.168139	0.5763	-0.408162
Fig. 4b	MoleculeNet	moleculenet	toxcast	NVS_NR_hPPARg	FCNN-FP	fcnn_fingerprint	1	0.0437831	0.268188	-0.224404
Fig. 4b	MoleculeNet	moleculenet	toxcast	NVS_NR_hPPARg	FCNN-Feat	fcnn_character	1	0.0977529	0.313088	-0.215335
Fig. 4b	MoleculeNet	moleculenet	toxcast	NVS_NR_hPPARg	MolCLR	molclr	1	0.170146	0.00428447	0.165861
Fig. 4b	MoleculeNet	moleculenet	toxcast	NVS_NR_hPPARg	XGB-FP	xgboost_fingerprint	1	0.0979936	0.0064904	0.0915032
Fig. 4b	MoleculeNet	moleculenet	toxcast	NVS_NR_hPPARg	XGB-Feat	xgboost_character	1	0.0570503	-0.00530099	0.0623512
Fig. 4b	MoleculeNet	moleculenet	toxcast	NVS_NR_hPXR	ChemBERTa-3	chemberta3	1	0.128617	0.00352769	0.125089
Fig. 4b	MoleculeNet	moleculenet	toxcast	NVS_NR_hPXR	D-MPNN	dmpnn	1	0.0285784	0.261917	-0.233339
Fig. 4b	MoleculeNet	moleculenet	toxcast	NVS_NR_hPXR	FCNN-FP	fcnn_fingerprint	1	-0.0556816	0.0338061	-0.0894878
Fig. 4b	MoleculeNet	moleculenet	toxcast	NVS_NR_hPXR	FCNN-Feat	fcnn_character	1	0.0288021	0.159754	-0.130952
Fig. 4b	MoleculeNet	moleculenet	toxcast	NVS_NR_hPXR	MolCLR	molclr	1	-0.0105774	0.051523	-0.0621004
Fig. 4b	MoleculeNet	moleculenet	toxcast	NVS_NR_hPXR	XGB-FP	xgboost_fingerprint	1	-0.03899	0.0541349	-0.0931249
Fig. 4b	MoleculeNet	moleculenet	toxcast	NVS_NR_hPXR	XGB-Feat	xgboost_character	1	0.165163	-0.023126	0.188289
Fig. 4b	MoleculeNet	moleculenet	toxcast	Tanguay_ZF_120hpf_AXIS_up	ChemBERTa-3	chemberta3	1	0.00711524	0.0648873	-0.057772
Fig. 4b	MoleculeNet	moleculenet	toxcast	Tanguay_ZF_120hpf_AXIS_up	D-MPNN	dmpnn	1	0.0948697	0.0570131	0.0378566
Fig. 4b	MoleculeNet	moleculenet	toxcast	Tanguay_ZF_120hpf_AXIS_up	FCNN-FP	fcnn_fingerprint	1	0.0338745	0.0559046	-0.0220301
Fig. 4b	MoleculeNet	moleculenet	toxcast	Tanguay_ZF_120hpf_AXIS_up	FCNN-Feat	fcnn_character	1	0.156156	0.122948	0.0332084
Fig. 4b	MoleculeNet	moleculenet	toxcast	Tanguay_ZF_120hpf_AXIS_up	MolCLR	molclr	1	-0.00844038	0.0757532	-0.0841935
Fig. 4b	MoleculeNet	moleculenet	toxcast	Tanguay_ZF_120hpf_AXIS_up	XGB-FP	xgboost_fingerprint	1	0.0422641	0.125074	-0.0828098
Fig. 4b	MoleculeNet	moleculenet	toxcast	Tanguay_ZF_120hpf_AXIS_up	XGB-Feat	xgboost_character	1	0.214129	0.137664	0.0764649
Fig. 4b	MoleculeNet	moleculenet	toxcast	Tanguay_ZF_120hpf_MORT_up	ChemBERTa-3	chemberta3	1	0.0644294	0.119293	-0.054864
Fig. 4b	MoleculeNet	moleculenet	toxcast	Tanguay_ZF_120hpf_MORT_up	D-MPNN	dmpnn	1	0.0486208	0.137276	-0.0886556
Fig. 4b	MoleculeNet	moleculenet	toxcast	Tanguay_ZF_120hpf_MORT_up	FCNN-FP	fcnn_fingerprint	1	0.084541	0.114424	-0.0298828
Fig. 4b	MoleculeNet	moleculenet	toxcast	Tanguay_ZF_120hpf_MORT_up	FCNN-Feat	fcnn_character	1	0.0326679	0.279917	-0.247249
Fig. 4b	MoleculeNet	moleculenet	toxcast	Tanguay_ZF_120hpf_MORT_up	MolCLR	molclr	1	0.105576	0.132058	-0.0264822
Fig. 4b	MoleculeNet	moleculenet	toxcast	Tanguay_ZF_120hpf_MORT_up	XGB-FP	xgboost_fingerprint	1	0.0865226	0.234062	-0.147539
Fig. 4b	MoleculeNet	moleculenet	toxcast	Tanguay_ZF_120hpf_MORT_up	XGB-Feat	xgboost_character	1	0.0500722	0.2946	-0.244528
Fig. 4c — Pairwise Spearman correlations across models
Figure panel	Benchmark	Benchmark key	Row model	Row model key	Column model	Column model key	Spearman rho	N task pairs
Fig. 4c	MoleculeNet	moleculenet	FCNN-FP	fcnn_指纹	FCNN-FP	fcnn_fingerprint	1	37
Fig. 4c	MoleculeNet	moleculenet	FCNN-FP	fcnn_指纹	FCNN-Feat	fcnn_character	0.334756	37
Fig. 4c	MoleculeNet	moleculenet	FCNN-FP	fcnn_指纹	XGB-FP	xgboost_fingerprint	0.796823	37
Fig. 4c	MoleculeNet	moleculenet	FCNN-FP	fcnn_指纹	XGB-Feat	xgboost_character	0.638217	37
Fig. 4c	MoleculeNet	moleculenet	FCNN-FP	fcnn_指纹	D-MPNN	dmpnn	0.581792	37
Fig. 4c	MoleculeNet	moleculenet	FCNN-FP	fcnn_指纹	MolCLR	molclr	0.641536	37
Fig. 4c	MoleculeNet	moleculenet	FCNN-FP	fcnn_指纹	ChemBERTa-3	chemberta3	0.773352	37
Fig. 4c	MoleculeNet	moleculenet	FCNN-Feat	fcnn_特征	FCNN-FP	fcnn_fingerprint	0.334756	37
Fig. 4c	MoleculeNet	moleculenet	FCNN-Feat	fcnn_特征	FCNN-Feat	fcnn_character	1	37
Fig. 4c	MoleculeNet	moleculenet	FCNN-Feat	fcnn_特征	XGB-FP	xgboost_fingerprint	0.553343	37
Fig. 4c	MoleculeNet	moleculenet	FCNN-Feat	fcnn_特征	XGB-Feat	xgboost_character	0.630156	37
Fig. 4c	MoleculeNet	moleculenet	FCNN-Feat	fcnn_特征	D-MPNN	dmpnn	0.662162	37
Fig. 4c	MoleculeNet	moleculenet	FCNN-Feat	fcnn_特征	MolCLR	molclr	0.619962	37
Fig. 4c	MoleculeNet	moleculenet	FCNN-Feat	fcnn_特征	ChemBERTa-3	chemberta3	0.470128	37
Fig. 4c	MoleculeNet	moleculenet	XGB-FP	xgboost_指纹	FCNN-FP	fcnn_fingerprint	0.796823	37
Fig. 4c	MoleculeNet	moleculenet	XGB-FP	xgboost_指纹	FCNN-Feat	fcnn_character	0.553343	37
Fig. 4c	MoleculeNet	moleculenet	XGB-FP	xgboost_指纹	XGB-FP	xgboost_fingerprint	1	37
Fig. 4c	MoleculeNet	moleculenet	XGB-FP	xgboost_指纹	XGB-Feat	xgboost_character	0.826932	37
Fig. 4c	MoleculeNet	moleculenet	XGB-FP	xgboost_指纹	D-MPNN	dmpnn	0.726174	37
Fig. 4c	MoleculeNet	moleculenet	XGB-FP	xgboost_指纹	MolCLR	molclr	0.80441	37
Fig. 4c	MoleculeNet	moleculenet	XGB-FP	xgboost_指纹	ChemBERTa-3	chemberta3	0.667378	37
Fig. 4c	MoleculeNet	moleculenet	XGB-Feat	xgboost_特征	FCNN-FP	fcnn_fingerprint	0.638217	37
Fig. 4c	MoleculeNet	moleculenet	XGB-Feat	xgboost_特征	FCNN-Feat	fcnn_character	0.630156	37
Fig. 4c	MoleculeNet	moleculenet	XGB-Feat	xgboost_特征	XGB-FP	xgboost_fingerprint	0.826932	37
Fig. 4c	MoleculeNet	moleculenet	XGB-Feat	xgboost_特征	XGB-Feat	xgboost_character	1	37
Fig. 4c	MoleculeNet	moleculenet	XGB-Feat	xgboost_特征	D-MPNN	dmpnn	0.550024	37
Fig. 4c	MoleculeNet	moleculenet	XGB-Feat	xgboost_特征	MolCLR	molclr	0.775249	37
Fig. 4c	MoleculeNet	moleculenet	XGB-Feat	xgboost_特征	ChemBERTa-3	chemberta3	0.633476	37
Fig. 4c	MoleculeNet	moleculenet	D-MPNN	dmpnn	FCNN-FP	fcnn_fingerprint	0.581792	37
Fig. 4c	MoleculeNet	moleculenet	D-MPNN	dmpnn	FCNN-Feat	fcnn_character	0.662162	37
Fig. 4c	MoleculeNet	moleculenet	D-MPNN	dmpnn	XGB-FP	xgboost_fingerprint	0.726174	37
Fig. 4c	MoleculeNet	moleculenet	D-MPNN	dmpnn	XGB-Feat	xgboost_character	0.550024	37
Fig. 4c	MoleculeNet	moleculenet	D-MPNN	dmpnn	D-MPNN	dmpnn	1	37
Fig. 4c	MoleculeNet	moleculenet	D-MPNN	dmpnn	MolCLR	molclr	0.751541	37
Fig. 4c	MoleculeNet	moleculenet	D-MPNN	dmpnn	ChemBERTa-3	chemberta3	0.545756	37
Fig. 4c	MoleculeNet	moleculenet	MolCLR	molclr	FCNN-FP	fcnn_fingerprint	0.641536	37
Fig. 4c	MoleculeNet	moleculenet	MolCLR	molclr	FCNN-Feat	fcnn_character	0.619962	37
Fig. 4c	MoleculeNet	moleculenet	MolCLR	molclr	XGB-FP	xgboost_fingerprint	0.80441	37
Fig. 4c	MoleculeNet	moleculenet	MolCLR	molclr	XGB-Feat	xgboost_character	0.775249	37
Fig. 4c	MoleculeNet	moleculenet	MolCLR	molclr	D-MPNN	dmpnn	0.751541	37
Fig. 4c	MoleculeNet	moleculenet	MolCLR	molclr	MolCLR	molclr	1	37
Fig. 4c	MoleculeNet	moleculenet	MolCLR	molclr	ChemBERTa-3	chemberta3	0.63964	37
Fig. 4c	MoleculeNet	moleculenet	ChemBERTa-3	chemberta3	FCNN-FP	fcnn_fingerprint	0.773352	37
Fig. 4c	MoleculeNet	moleculenet	ChemBERTa-3	chemberta3	FCNN-Feat	fcnn_character	0.470128	37
Fig. 4c	MoleculeNet	moleculenet	ChemBERTa-3	chemberta3	XGB-FP	xgboost_fingerprint	0.667378	37
Fig. 4c	MoleculeNet	moleculenet	ChemBERTa-3	chemberta3	XGB-Feat	xgboost_character	0.633476	37
Fig. 4c	MoleculeNet	moleculenet	ChemBERTa-3	chemberta3	D-MPNN	dmpnn	0.545756	37
Fig. 4c	MoleculeNet	moleculenet	ChemBERTa-3	chemberta3	MolCLR	molclr	0.63964	37
Fig. 4c	MoleculeNet	moleculenet	ChemBERTa-3	chemberta3	ChemBERTa-3	chemberta3	1	37
Fig. 4c	ADMET	admet	FCNN-FP	fcnn_指纹	FCNN-FP	fcnn_fingerprint	1	26
Fig. 4c	ADMET	admet	FCNN-FP	fcnn_指纹	FCNN-Feat	fcnn_character	0.876923	26
Fig. 4c	ADMET	admet	FCNN-FP	fcnn_指纹	XGB-FP	xgboost_fingerprint	0.930256	26
Fig. 4c	ADMET	admet	FCNN-FP	fcnn_指纹	XGB-Feat	xgboost_character	0.870769	26
Fig. 4c	ADMET	admet	FCNN-FP	fcnn_指纹	D-MPNN	dmpnn	0.859145	26
Fig. 4c	ADMET	admet	FCNN-FP	fcnn_指纹	MolCLR	molclr	0.784615	26
Fig. 4c	ADMET	admet	FCNN-FP	fcnn_指纹	ChemBERTa-3	chemberta3	0.847521	26
Fig. 4c	ADMET	admet	FCNN-Feat	fcnn_特征	FCNN-FP	fcnn_fingerprint	0.876923	26
Fig. 4c	ADMET	admet	FCNN-Feat	fcnn_特征	FCNN-Feat	fcnn_character	1	26
Fig. 4c	ADMET	admet	FCNN-Feat	fcnn_特征	XGB-FP	xgboost_fingerprint	0.816752	26
Fig. 4c	ADMET	admet	FCNN-Feat	fcnn_特征	XGB-Feat	xgboost_character	0.923419	26
Fig. 4c	ADMET	admet	FCNN-Feat	fcnn_特征	D-MPNN	dmpnn	0.894017	26
Fig. 4c	ADMET	admet	FCNN-Feat	fcnn_特征	MolCLR	molclr	0.809915	26
Fig. 4c	ADMET	admet	FCNN-Feat	fcnn_特征	ChemBERTa-3	chemberta3	0.847521	26
Fig. 4c	ADMET	admet	XGB-FP	xgboost_指纹	FCNN-FP	fcnn_fingerprint	0.930256	26
Fig. 4c	ADMET	admet	XGB-FP	xgboost_指纹	FCNN-Feat	fcnn_character	0.816752	26
Fig. 4c	ADMET	admet	XGB-FP	xgboost_指纹	XGB-FP	xgboost_fingerprint	1	26
Fig. 4c	ADMET	admet	XGB-FP	xgboost_指纹	XGB-Feat	xgboost_character	0.871453	26
Fig. 4c	ADMET	admet	XGB-FP	xgboost_指纹	D-MPNN	dmpnn	0.824274	26
Fig. 4c	ADMET	admet	XGB-FP	xgboost_指纹	MolCLR	molclr	0.783248	26
Fig. 4c	ADMET	admet	XGB-FP	xgboost_指纹	ChemBERTa-3	chemberta3	0.783248	26
Fig. 4c	ADMET	admet	XGB-Feat	xgboost_特征	FCNN-FP	fcnn_fingerprint	0.870769	26
Fig. 4c	ADMET	admet	XGB-Feat	xgboost_特征	FCNN-Feat	fcnn_character	0.923419	26
Fig. 4c	ADMET	admet	XGB-Feat	xgboost_特征	XGB-FP	xgboost_fingerprint	0.871453	26
Fig. 4c	ADMET	admet	XGB-Feat	xgboost_特征	XGB-Feat	xgboost_character	1	26
Fig. 4c	ADMET	admet	XGB-Feat	xgboost_特征	D-MPNN	dmpnn	0.870085	26
Fig. 4c	ADMET	admet	XGB-Feat	xgboost_特征	MolCLR	molclr	0.742906	26
Fig. 4c	ADMET	admet	XGB-Feat	xgboost_特征	ChemBERTa-3	chemberta3	0.801709	26
Fig. 4c	ADMET	admet	D-MPNN	dmpnn	FCNN-FP	fcnn_fingerprint	0.859145	26
Fig. 4c	ADMET	admet	D-MPNN	dmpnn	FCNN-Feat	fcnn_character	0.894017	26
Fig. 4c	ADMET	admet	D-MPNN	dmpnn	XGB-FP	xgboost_fingerprint	0.824274	26
Fig. 4c	ADMET	admet	D-MPNN	dmpnn	XGB-Feat	xgboost_character	0.870085	26
Fig. 4c	ADMET	admet	D-MPNN	dmpnn	D-MPNN	dmpnn	1	26
Fig. 4c	ADMET	admet	D-MPNN	dmpnn	MolCLR	molclr	0.871453	26
Fig. 4c	ADMET	admet	D-MPNN	dmpnn	ChemBERTa-3	chemberta3	0.85641	26
Fig. 4c	ADMET	admet	MolCLR	molclr	FCNN-FP	fcnn_fingerprint	0.784615	26
Fig. 4c	ADMET	admet	MolCLR	molclr	FCNN-Feat	fcnn_character	0.809915	26
Fig. 4c	ADMET	admet	MolCLR	molclr	XGB-FP	xgboost_fingerprint	0.783248	26
Fig. 4c	ADMET	admet	MolCLR	molclr	XGB-Feat	xgboost_character	0.742906	26
Fig. 4c	ADMET	admet	MolCLR	molclr	D-MPNN	dmpnn	0.871453	26
Fig. 4c	ADMET	admet	MolCLR	molclr	MolCLR	molclr	1	26
Fig. 4c	ADMET	admet	MolCLR	molclr	ChemBERTa-3	chemberta3	0.863932	26
Fig. 4c	ADMET	admet	ChemBERTa-3	chemberta3	FCNN-FP	fcnn_fingerprint	0.847521	26
Fig. 4c	ADMET	admet	ChemBERTa-3	chemberta3	FCNN-Feat	fcnn_character	0.847521	26
Fig. 4c	ADMET	admet	ChemBERTa-3	chemberta3	XGB-FP	xgboost_fingerprint	0.783248	26
Fig. 4c	ADMET	admet	ChemBERTa-3	chemberta3	XGB-Feat	xgboost_character	0.801709	26
Fig. 4c	ADMET	admet	ChemBERTa-3	chemberta3	D-MPNN	dmpnn	0.85641	26
Fig. 4c	ADMET	admet	ChemBERTa-3	chemberta3	MolCLR	molclr	0.863932	26
Fig. 4c	ADMET	admet	ChemBERTa-3	chemberta3	ChemBERTa-3	chemberta3	1	26

## Sheet: Figure 5
Source figure	Panel	Source data type	Benchmark	Dataset	Target	Model	Fold	Condition	Subset	Row index	normPR	ECDF	Threshold	Proportion	Count n	Median	Q1	Q3	ECDF scale factor	Ordinary quantile	ECDF probability	Amplification
Figure 5	a	normPR distribution	ADMET	ames	ames	chemberta3	2	Ordinary folds	overall	1	0.73448
Figure 5	a	normPR distribution	ADMET	ames	ames	dmpnn	2	Ordinary folds	overall	2	0.75552
Figure 5	a	normPR distribution	ADMET	ames	ames	fcnn_fingerprint	2	Ordinary folds	overall	3	0.665469
Figure 5	a	normPR distribution	ADMET	ames	ames	fcnn_character	2	Ordinary folds	overall	4	0.52353
Figure 5	a	normPR distribution	ADMET	ames	ames	molclr	2	Ordinary folds	overall	5	0.638794
Figure 5	a	normPR distribution	ADMET	ames	ames	xgboost_fingerprint	2	Ordinary folds	overall	6	0.702091
Figure 5	a	normPR distribution	ADMET	ames	ames	xgboost_character	2	Ordinary folds	overall	7	0.622561
Figure 5	a	normPR distribution	ADMET	ames	ames	chemberta3	3	Ordinary folds	overall	8	0.730672
Figure 5	a	normPR distribution	ADMET	ames	ames	dmpnn	3	Ordinary folds	overall	9	0.680168
Figure 5	a	normPR distribution	ADMET	ames	ames	fcnn_fingerprint	3	Ordinary folds	overall	10	0.702457
Figure 5	a	normPR distribution	ADMET	ames	ames	fcnn_character	3	Ordinary folds	overall	11	0.711454
Figure 5	a	normPR distribution	ADMET	ames	ames	molclr	3	Ordinary folds	overall	12	0.487647
Figure 5	a	normPR distribution	ADMET	ames	ames	xgboost_fingerprint	3	Ordinary folds	overall	13	0.75109
Figure 5	a	normPR distribution	ADMET	ames	ames	xgboost_character	3	Ordinary folds	overall	14	0.679922
Figure 5	a	normPR distribution	ADMET	ames	ames	chemberta3	4	Ordinary folds	overall	15	0.750265
Figure 5	a	normPR distribution	ADMET	ames	ames	dmpnn	4	Ordinary folds	overall	16	0.685896
Figure 5	a	normPR distribution	ADMET	ames	ames	fcnn_fingerprint	4	Ordinary folds	overall	17	0.677646
Figure 5	a	normPR distribution	ADMET	ames	ames	fcnn_character	4	Ordinary folds	overall	18	0.753452
Figure 5	a	normPR distribution	ADMET	ames	ames	molclr	4	Ordinary folds	overall	19	0.725504
Figure 5	a	normPR distribution	ADMET	ames	ames	xgboost_fingerprint	4	Ordinary folds	overall	20	0.724418
Figure 5	a	normPR distribution	ADMET	ames	ames	xgboost_character	4	Ordinary folds	overall	21	0.785696
Figure 5	a	normPR distribution	ADMET	ames	ames	chemberta3	5	Ordinary folds	overall	22	0.722757
Figure 5	a	normPR distribution	ADMET	ames	ames	dmpnn	5	Ordinary folds	overall	23	0.819101
Figure 5	a	normPR distribution	ADMET	ames	ames	fcnn_fingerprint	5	Ordinary folds	overall	24	0.786271
Figure 5	a	normPR distribution	ADMET	ames	ames	fcnn_character	5	Ordinary folds	overall	25	0.702671
Figure 5	a	normPR distribution	ADMET	ames	ames	molclr	5	Ordinary folds	overall	26	0.737003
Figure 5	a	normPR distribution	ADMET	ames	ames	xgboost_fingerprint	5	Ordinary folds	overall	27	0.792115
Figure 5	a	normPR distribution	ADMET	ames	ames	xgboost_character	5	Ordinary folds	overall	28	0.692798
Figure 5	a	normPR distribution	ADMET	ames	ames	chemberta3	6	Ordinary folds	overall	29	0.618966
Figure 5	a	normPR distribution	ADMET	ames	ames	dmpnn	6	Ordinary folds	overall	30	0.626638
Figure 5	a	normPR distribution	ADMET	ames	ames	fcnn_fingerprint	6	Ordinary folds	overall	31	0.606695
Figure 5	a	normPR distribution	ADMET	ames	ames	fcnn_character	6	Ordinary folds	overall	32	0.575849
Figure 5	a	normPR distribution	ADMET	ames	ames	molclr	6	Ordinary folds	overall	33	0.67258
Figure 5	a	normPR distribution	ADMET	ames	ames	xgboost_fingerprint	6	Ordinary folds	overall	34	0.627998
Figure 5	a	normPR distribution	ADMET	ames	ames	xgboost_character	6	Ordinary folds	overall	35	0.511127
Figure 5	a	normPR distribution	ADMET	ames	ames	chemberta3	7	Ordinary folds	overall	36	0.718494
Figure 5	a	normPR distribution	ADMET	ames	ames	dmpnn	7	Ordinary folds	overall	37	0.755951
Figure 5	a	normPR distribution	ADMET	ames	ames	fcnn_fingerprint	7	Ordinary folds	overall	38	0.757724
Figure 5	a	normPR distribution	ADMET	ames	ames	fcnn_character	7	Ordinary folds	overall	39	0.711221
Figure 5	a	normPR distribution	ADMET	ames	ames	molclr	7	Ordinary folds	overall	40	0.760568
Figure 5	a	normPR distribution	ADMET	ames	ames	xgboost_fingerprint	7	Ordinary folds	overall	41	0.783954
Figure 5	a	normPR distribution	ADMET	ames	ames	xgboost_character	7	Ordinary folds	overall	42	0.614945
Figure 5	a	normPR distribution	ADMET	ames	ames	chemberta3	8	Ordinary folds	overall	43	0.745305
Figure 5	a	normPR distribution	ADMET	ames	ames	dmpnn	8	Ordinary folds	overall	44	0.69621
Figure 5	a	normPR distribution	ADMET	ames	ames	fcnn_fingerprint	8	Ordinary folds	overall	45	0.706783
Figure 5	a	normPR distribution	ADMET	ames	ames	fcnn_character	8	Ordinary folds	overall	46	0.717528
Figure 5	a	normPR distribution	ADMET	ames	ames	molclr	8	Ordinary folds	overall	47	0.753581
Figure 5	a	normPR distribution	ADMET	ames	ames	xgboost_fingerprint	8	Ordinary folds	overall	48	0.774118
Figure 5	a	normPR distribution	ADMET	ames	ames	xgboost_character	8	Ordinary folds	overall	49	0.642287
Figure 5	a	normPR distribution	ADMET	ames	ames	chemberta3	9	Ordinary folds	overall	50	0.825056
Figure 5	a	normPR distribution	ADMET	ames	ames	dmpnn	9	Ordinary folds	overall	51	0.823739
Figure 5	a	normPR distribution	ADMET	ames	ames	fcnn_fingerprint	9	Ordinary folds	overall	52	0.820998
Figure 5	a	normPR distribution	ADMET	ames	ames	fcnn_character	9	Ordinary folds	overall	53	0.743177
Figure 5	a	normPR distribution	ADMET	ames	ames	molclr	9	Ordinary folds	overall	54	0.790382
Figure 5	a	normPR distribution	ADMET	ames	ames	xgboost_fingerprint	9	Ordinary folds	overall	55	0.848139
Figure 5	a	normPR distribution	ADMET	ames	ames	xgboost_character	9	Ordinary folds	overall	56	0.761007
Figure 5	a	normPR distribution	ADMET	ames	ames	chemberta3	10	Ordinary folds	overall	57	0.664367
Figure 5	a	normPR distribution	ADMET	ames	ames	dmpnn	10	Ordinary folds	overall	58	0.70026
Figure 5	a	normPR distribution	ADMET	ames	ames	fcnn_fingerprint	10	Ordinary folds	overall	59	0.601483
Figure 5	a	normPR distribution	ADMET	ames	ames	fcnn_character	10	Ordinary folds	overall	60	0.673235
Figure 5	a	normPR distribution	ADMET	ames	ames	molclr	10	Ordinary folds	overall	61	0.739493
Figure 5	a	normPR distribution	ADMET	ames	ames	xgboost_fingerprint	10	Ordinary folds	overall	62	0.619141
Figure 5	a	normPR distribution	ADMET	ames	ames	xgboost_character	10	Ordinary folds	overall	63	0.630772
Figure 5	a	normPR distribution	ADMET	avian_tox	avian_tox	chemberta3	2	Ordinary folds	overall	64	0.493
Figure 5	a	normPR distribution	ADMET	avian_tox	avian_tox	dmpnn	2	Ordinary folds	overall	65	0.337884
Figure 5	a	normPR distribution	ADMET	avian_tox	avian_tox	fcnn_fingerprint	2	Ordinary folds	overall	66	0.517834
Figure 5	a	normPR distribution	ADMET	avian_tox	avian_tox	fcnn_character	2	Ordinary folds	overall	67	0.522412
Figure 5	a	normPR distribution	ADMET	avian_tox	avian_tox	molclr	2	Ordinary folds	overall	68	0.49891
Figure 5	a	normPR distribution	ADMET	avian_tox	avian_tox	xgboost_fingerprint	2	Ordinary folds	overall	69	0.357156
Figure 5	a	normPR distribution	ADMET	avian_tox	avian_tox	xgboost_character	2	Ordinary folds	overall	70	0.456209
Figure 5	a	normPR distribution	ADMET	avian_tox	avian_tox	chemberta3	5	Ordinary folds	overall	71	0.548612
Figure 5	a	normPR distribution	ADMET	avian_tox	avian_tox	dmpnn	5	Ordinary folds	overall	72	0.662283
Figure 5	a	normPR distribution	ADMET	avian_tox	avian_tox	fcnn_fingerprint	5	Ordinary folds	overall	73	0.44195
Figure 5	a	normPR distribution	ADMET	avian_tox	avian_tox	fcnn_character	5	Ordinary folds	overall	74	0.407365
Figure 5	a	normPR distribution	ADMET	avian_tox	avian_tox	molclr	5	Ordinary folds	overall	75	0.153026
Figure 5	a	normPR distribution	ADMET	avian_tox	avian_tox	xgboost_fingerprint	5	Ordinary folds	overall	76	0.523473
Figure 5	a	normPR distribution	ADMET	avian_tox	avian_tox	xgboost_character	5	Ordinary folds	overall	77	0.379992
Figure 5	a	normPR distribution	ADMET	bee_tox	bee_tox	chemberta3	2	Ordinary folds	overall	78	0.271088
Figure 5	a	normPR distribution	ADMET	bee_tox	bee_tox	dmpnn	2	Ordinary folds	overall	79	0.559234
Figure 5	a	normPR distribution	ADMET	bee_tox	bee_tox	fcnn_fingerprint	2	Ordinary folds	overall	80	0.305013
Figure 5	a	normPR distribution	ADMET	bee_tox	bee_tox	fcnn_character	2	Ordinary folds	overall	81	0.251279
Figure 5	a	normPR distribution	ADMET	bee_tox	bee_tox	molclr	2	Ordinary folds	overall	82	0.520108
Figure 5	a	normPR distribution	ADMET	bee_tox	bee_tox	xgboost_fingerprint	2	Ordinary folds	overall	83	0.388098
Figure 5	a	normPR distribution	ADMET	bee_tox	bee_tox	xgboost_character	2	Ordinary folds	overall	84	0.407482
Figure 5	a	normPR distribution	ADMET	bee_tox	bee_tox	chemberta3	3	Ordinary folds	overall	85	0.707144
Figure 5	a	normPR distribution	ADMET	bee_tox	bee_tox	dmpnn	3	Ordinary folds	overall	86	0.554062
Figure 5	a	normPR distribution	ADMET	bee_tox	bee_tox	fcnn_fingerprint	3	Ordinary folds	overall	87	0.508205
Figure 5	a	normPR distribution	ADMET	bee_tox	bee_tox	fcnn_character	3	Ordinary folds	overall	88	0.477464
Figure 5	a	normPR distribution	ADMET	bee_tox	bee_tox	molclr	3	Ordinary folds	overall	89	0.335154
Figure 5	a	normPR distribution	ADMET	bee_tox	bee_tox	xgboost_fingerprint	3	Ordinary folds	overall	90	0.550018
Figure 5	a	normPR distribution	ADMET	bee_tox	bee_tox	xgboost_character	3	Ordinary folds	overall	91	0.699608
Figure 5	a	normPR distribution	ADMET	bee_tox	bee_tox	chemberta3	4	Ordinary folds	overall	92	0.789674
Figure 5	a	normPR distribution	ADMET	bee_tox	bee_tox	dmpnn	4	Ordinary folds	overall	93	0.865031
Figure 5	a	normPR distribution	ADMET	bee_tox	bee_tox	fcnn_fingerprint	4	Ordinary folds	overall	94	0.685768
Figure 5	a	normPR distribution	ADMET	bee_tox	bee_tox	fcnn_character	4	Ordinary folds	overall	95	0.817875
Figure 5	a	normPR distribution	ADMET	bee_tox	bee_tox	molclr	4	Ordinary folds	overall	96	0.299514
Figure 5	a	normPR distribution	ADMET	bee_tox	bee_tox	xgboost_fingerprint	4	Ordinary folds	overall	97	0.542566
Figure 5	a	normPR distribution	ADMET	bee_tox	bee_tox	xgboost_character	4	Ordinary folds	overall	98	0.71651
Figure 5	a	normPR distribution	ADMET	biodegradation	biodegradation	chemberta3	2	Ordinary folds	overall	99	0.41519
Figure 5	a	normPR distribution	ADMET	biodegradation	biodegradation	dmpnn	2	Ordinary folds	overall	100	0.635353
Figure 5	a	normPR distribution	ADMET	biodegradation	biodegradation	fcnn_fingerprint	2	Ordinary folds	overall	101	0.339889
Figure 5	a	normPR distribution	ADMET	biodegradation	biodegradation	fcnn_character	2	Ordinary folds	overall	102	0.327989
Figure 5	a	normPR distribution	ADMET	biodegradation	biodegradation	molclr	2	Ordinary folds	overall	103	0.5113
Figure 5	a	normPR distribution	ADMET	biodegradation	biodegradation	xgboost_fingerprint	2	Ordinary folds	overall	104	0.224044
Figure 5	a	normPR distribution	ADMET	biodegradation	biodegradation	xgboost_character	2	Ordinary folds	overall	105	0.629021
Figure 5	a	normPR distribution	ADMET	biodegradation	biodegradation	chemberta3	3	Ordinary folds	overall	106	0.628124
Figure 5	a	normPR distribution	ADMET	biodegradation	biodegradation	dmpnn	3	Ordinary folds	overall	107	0.539569
Figure 5	a	normPR distribution	ADMET	biodegradation	biodegradation	fcnn_fingerprint	3	Ordinary folds	overall	108	0.361127
Figure 5	a	normPR distribution	ADMET	biodegradation	biodegradation	fcnn_character	3	Ordinary folds	overall	109	0.701394
Figure 5	a	normPR distribution	ADMET	biodegradation	biodegradation	molclr	3	Ordinary folds	overall	110	0.635194
Figure 5	a	normPR distribution	ADMET	biodegradation	biodegradation	xgboost_fingerprint	3	Ordinary folds	overall	111	0.492615
Figure 5	a	normPR distribution	ADMET	biodegradation	biodegradation	xgboost_character	3	Ordinary folds	overall	112	0.72247
Figure 5	a	normPR distribution	ADMET	biodegradation	biodegradation	chemberta3	4	Ordinary folds	overall	113	0.518139
Figure 5	a	normPR distribution	ADMET	biodegradation	biodegradation	dmpnn	4	Ordinary folds	overall	114	0.523848
Figure 5	a	normPR distribution	ADMET	biodegradation	biodegradation	fcnn_fingerprint	4	Ordinary folds	overall	115	0.283801
Figure 5	a	normPR distribution	ADMET	biodegradation	biodegradation	fcnn_character	4	Ordinary folds	overall	116	0.448228
Figure 5	a	normPR distribution	ADMET	biodegradation	biodegradation	molclr	4	Ordinary folds	overall	117	0.0194743
Figure 5	a	normPR distribution	ADMET	biodegradation	biodegradation	xgboost_fingerprint	4	Ordinary folds	overall	118	0.456917
Figure 5	a	normPR distribution	ADMET	biodegradation	biodegradation	xgboost_character	4	Ordinary folds	overall	119	0.396936
Figure 5	a	normPR distribution	ADMET	biodegradation	biodegradation	chemberta3	5	Ordinary folds	overall	120	0.435992
Figure 5	a	normPR distribution	ADMET	biodegradation	biodegradation	dmpnn	5	Ordinary folds	overall	121	0.555016
Figure 5	a	normPR distribution	ADMET	biodegradation	biodegradation	fcnn_fingerprint	5	Ordinary folds	overall	122	0.353817
Figure 5	a	normPR distribution	ADMET	biodegradation	biodegradation	fcnn_character	5	Ordinary folds	overall	123	0.309304
Figure 5	a	normPR distribution	ADMET	biodegradation	biodegradation	molclr	5	Ordinary folds	overall	124	0.229902
Figure 5	a	normPR distribution	ADMET	biodegradation	biodegradation	xgboost_fingerprint	5	Ordinary folds	overall	125	0.350366
Figure 5	a	normPR distribution	ADMET	biodegradation	biodegradation	xgboost_character	5	Ordinary folds	overall	126	0.290074
Figure 5	a	normPR distribution	ADMET	biodegradation	biodegradation	chemberta3	6	Ordinary folds	overall	127	0.402876
Figure 5	a	normPR distribution	ADMET	biodegradation	biodegradation	dmpnn	6	Ordinary folds	overall	128	0.437886
Figure 5	a	normPR distribution	ADMET	biodegradation	biodegradation	fcnn_fingerprint	6	Ordinary folds	overall	129	0.45192
Figure 5	a	normPR distribution	ADMET	biodegradation	biodegradation	fcnn_character	6	Ordinary folds	overall	130	0.398107
Figure 5	a	normPR distribution	ADMET	biodegradation	biodegradation	molclr	6	Ordinary folds	overall	131	0.407277
Figure 5	a	normPR distribution	ADMET	biodegradation	biodegradation	xgboost_fingerprint	6	Ordinary folds	overall	132	0.383632
Figure 5	a	normPR distribution	ADMET	biodegradation	biodegradation	xgboost_character	6	Ordinary folds	overall	133	0.383439
Figure 5	a	normPR distribution	ADMET	biodegradation	biodegradation	chemberta3	7	Ordinary folds	overall	134	0.628977
Figure 5	a	normPR distribution	ADMET	biodegradation	biodegradation	dmpnn	7	Ordinary folds	overall	135	0.761912
Figure 5	a	normPR distribution	ADMET	biodegradation	biodegradation	fcnn_fingerprint	7	Ordinary folds	overall	136	0.264639
Figure 5	a	normPR distribution	ADMET	biodegradation	biodegradation	fcnn_character	7	Ordinary folds	overall	137	0.398766
Figure 5	a	normPR distribution	ADMET	biodegradation	biodegradation	molclr	7	Ordinary folds	overall	138	0.746461
Figure 5	a	normPR distribution	ADMET	biodegradation	biodegradation	xgboost_fingerprint	7	Ordinary folds	overall	139	0.249634
Figure 5	a	normPR distribution	ADMET	biodegradation	biodegradation	xgboost_character	7	Ordinary folds	overall	140	0.571802
Figure 5	a	normPR distribution	ADMET	carcinogenicity	carcinogenicity	chemberta3	2	Ordinary folds	overall	141	0.361475
Figure 5	a	normPR distribution	ADMET	carcinogenicity	carcinogenicity	dmpnn	2	Ordinary folds	overall	142	0.38734
Figure 5	a	normPR distribution	ADMET	carcinogenicity	carcinogenicity	fcnn_fingerprint	2	Ordinary folds	overall	143	0.375797
Figure 5	a	normPR distribution	ADMET	carcinogenicity	carcinogenicity	fcnn_character	2	Ordinary folds	overall	144	0.23074
Figure 5	a	normPR distribution	ADMET	carcinogenicity	carcinogenicity	molclr	2	Ordinary folds	overall	145	0.115272
Figure 5	a	normPR distribution	ADMET	carcinogenicity	carcinogenicity	xgboost_fingerprint	2	Ordinary folds	overall	146	0.382946
Figure 5	a	normPR distribution	ADMET	carcinogenicity	carcinogenicity	xgboost_character	2	Ordinary folds	overall	147	0.237494
Figure 5	a	normPR distribution	ADMET	carcinogenicity	carcinogenicity	chemberta3	3	Ordinary folds	overall	148	0.418704
Figure 5	a	normPR distribution	ADMET	carcinogenicity	carcinogenicity	dmpnn	3	Ordinary folds	overall	149	0.532823
Figure 5	a	normPR distribution	ADMET	carcinogenicity	carcinogenicity	fcnn_fingerprint	3	Ordinary folds	overall	150	0.56889
Figure 5	a	normPR distribution	ADMET	carcinogenicity	carcinogenicity	fcnn_character	3	Ordinary folds	overall	151	0.451854
Figure 5	a	normPR distribution	ADMET	carcinogenicity	carcinogenicity	molclr	3	Ordinary folds	overall	152	0.48734
Figure 5	a	normPR distribution	ADMET	carcinogenicity	carcinogenicity	xgboost_fingerprint	3	Ordinary folds	overall	153	0.498134
Figure 5	a	normPR distribution	ADMET	carcinogenicity	carcinogenicity	xgboost_character	3	Ordinary folds	overall	154	0.474646
Figure 5	a	normPR distribution	ADMET	carcinogenicity	carcinogenicity	chemberta3	4	Ordinary folds	overall	155	0.309402
Figure 5	a	normPR distribution	ADMET	carcinogenicity	carcinogenicity	dmpnn	4	Ordinary folds	overall	156	0.389255
Figure 5	a	normPR distribution	ADMET	carcinogenicity	carcinogenicity	fcnn_fingerprint	4	Ordinary folds	overall	157	0.289761
Figure 5	a	normPR distribution	ADMET	carcinogenicity	carcinogenicity	fcnn_character	4	Ordinary folds	overall	158	0.392379
Figure 5	a	normPR distribution	ADMET	carcinogenicity	carcinogenicity	molclr	4	Ordinary folds	overall	159	0.322475
Figure 5	a	normPR distribution	ADMET	carcinogenicity	carcinogenicity	xgboost_fingerprint	4	Ordinary folds	overall	160	0.318073
Figure 5	a	normPR distribution	ADMET	carcinogenicity	carcinogenicity	xgboost_character	4	Ordinary folds	overall	161	0.293239
Figure 5	a	normPR distribution	ADMET	carcinogenicity	carcinogenicity	chemberta3	5	Ordinary folds	overall	162	0.368258
Figure 5	a	normPR distribution	ADMET	carcinogenicity	carcinogenicity	dmpnn	5	Ordinary folds	overall	163	0.4619
Figure 5	a	normPR distribution	ADMET	carcinogenicity	carcinogenicity	fcnn_fingerprint	5	Ordinary folds	overall	164	0.461613
Figure 5	a	normPR distribution	ADMET	carcinogenicity	carcinogenicity	fcnn_character	5	Ordinary folds	overall	165	0.336026
Figure 5	a	normPR distribution	ADMET	carcinogenicity	carcinogenicity	molclr	5	Ordinary folds	overall	166	0.422726
Figure 5	a	normPR distribution	ADMET	carcinogenicity	carcinogenicity	xgboost_fingerprint	5	Ordinary folds	overall	167	0.365298
Figure 5	a	normPR distribution	ADMET	carcinogenicity	carcinogenicity	xgboost_character	5	Ordinary folds	overall	168	0.407925
Figure 5	a	normPR distribution	ADMET	carcinogenicity	carcinogenicity	chemberta3	6	Ordinary folds	overall	169	0.403968
Figure 5	a	normPR distribution	ADMET	carcinogenicity	carcinogenicity	dmpnn	6	Ordinary folds	overall	170	0.421579
Figure 5	a	normPR distribution	ADMET	carcinogenicity	carcinogenicity	fcnn_fingerprint	6	Ordinary folds	overall	171	0.389217
Figure 5	a	normPR distribution	ADMET	carcinogenicity	carcinogenicity	fcnn_character	6	Ordinary folds	overall	172	0.391031
Figure 5	a	normPR distribution	ADMET	carcinogenicity	carcinogenicity	molclr	6	Ordinary folds	overall	173	0.18785
Figure 5	a	normPR distribution	ADMET	carcinogenicity	carcinogenicity	xgboost_fingerprint	6	Ordinary folds	overall	174	0.297866
Figure 5	a	normPR distribution	ADMET	carcinogenicity	carcinogenicity	xgboost_character	6	Ordinary folds	overall	175	0.484525
Figure 5	a	normPR distribution	ADMET	carcinogenicity	carcinogenicity	chemberta3	7	Ordinary folds	overall	176	0.480809
Figure 5	a	normPR distribution	ADMET	carcinogenicity	carcinogenicity	dmpnn	7	Ordinary folds	overall	177	0.307906
Figure 5	a	normPR distribution	ADMET	carcinogenicity	carcinogenicity	fcnn_fingerprint	7	Ordinary folds	overall	178	0.576669
Figure 5	a	normPR distribution	ADMET	carcinogenicity	carcinogenicity	fcnn_character	7	Ordinary folds	overall	179	0.416756
Figure 5	a	normPR distribution	ADMET	carcinogenicity	carcinogenicity	molclr	7	Ordinary folds	overall	180	0.460414
Figure 5	a	normPR distribution	ADMET	carcinogenicity	carcinogenicity	xgboost_fingerprint	7	Ordinary folds	overall	181	0.518924
Figure 5	a	normPR distribution	ADMET	carcinogenicity	carcinogenicity	xgboost_character	7	Ordinary folds	overall	182	0.33457
Figure 5	a	normPR distribution	ADMET	crustacean	crustacean	chemberta3	2	Ordinary folds	overall	183	0.741706
Figure 5	a	normPR distribution	ADMET	crustacean	crustacean	dmpnn	2	Ordinary folds	overall	184	0.874934
Figure 5	a	normPR distribution	ADMET	crustacean	crustacean	fcnn_fingerprint	2	Ordinary folds	overall	185	0.673459
Figure 5	a	normPR distribution	ADMET	crustacean	crustacean	fcnn_character	2	Ordinary folds	overall	186	0.898555
Figure 5	a	normPR distribution	ADMET	crustacean	crustacean	molclr	2	Ordinary folds	overall	187	0.839008
Figure 5	a	normPR distribution	ADMET	crustacean	crustacean	xgboost_fingerprint	2	Ordinary folds	overall	188	0.671877
Figure 5	a	normPR distribution	ADMET	crustacean	crustacean	xgboost_character	2	Ordinary folds	overall	189	0.904267
Figure 5	a	normPR distribution	ADMET	crustacean	crustacean	chemberta3	3	Ordinary folds	overall	190	0.610424
Figure 5	a	normPR distribution	ADMET	crustacean	crustacean	dmpnn	3	Ordinary folds	overall	191	0.742976
Figure 5	a	normPR distribution	ADMET	crustacean	crustacean	fcnn_fingerprint	3	Ordinary folds	overall	192	0.753598
Figure 5	a	normPR distribution	ADMET	crustacean	crustacean	fcnn_character	3	Ordinary folds	overall	193	0.723271
Figure 5	a	normPR distribution	ADMET	crustacean	crustacean	molclr	3	Ordinary folds	overall	194	0.606552
Figure 5	a	normPR distribution	ADMET	crustacean	crustacean	xgboost_fingerprint	3	Ordinary folds	overall	195	0.6138
Figure 5	a	normPR distribution	ADMET	crustacean	crustacean	xgboost_character	3	Ordinary folds	overall	196	0.701946
Figure 5	a	normPR distribution	ADMET	crustacean	crustacean	chemberta3	4	Ordinary folds	overall	197	0.548539
Figure 5	a	normPR distribution	ADMET	crustacean	crustacean	dmpnn	4	Ordinary folds	overall	198	0.618504
Figure 5	a	normPR distribution	ADMET	crustacean	crustacean	fcnn_fingerprint	4	Ordinary folds	overall	199	0.510284
Figure 5	a	normPR distribution	ADMET	crustacean	crustacean	fcnn_character	4	Ordinary folds	overall	200	0.759486
Figure 5	a	normPR distribution	ADMET	crustacean	crustacean	molclr	4	Ordinary folds	overall	201	0.691296
Figure 5	a	normPR distribution	ADMET	crustacean	crustacean	xgboost_fingerprint	4	Ordinary folds	overall	202	0.544663
Figure 5	a	normPR distribution	ADMET	crustacean	crustacean	xgboost_character	4	Ordinary folds	overall	203	0.605559
Figure 5	a	normPR distribution	ADMET	crustacean	crustacean	chemberta3	5	Ordinary folds	overall	204	0.756233
Figure 5	a	normPR distribution	ADMET	crustacean	crustacean	dmpnn	5	Ordinary folds	overall	205	0.613321
Figure 5	a	normPR distribution	ADMET	crustacean	crustacean	fcnn_fingerprint	5	Ordinary folds	overall	206	0.473976
Figure 5	a	normPR distribution	ADMET	crustacean	crustacean	fcnn_character	5	Ordinary folds	overall	207	0.64404
Figure 5	a	normPR distribution	ADMET	crustacean	crustacean	molclr	5	Ordinary folds	overall	208	0.701977
Figure 5	a	normPR distribution	ADMET	crustacean	crustacean	xgboost_fingerprint	5	Ordinary folds	overall	209	0.473436
Figure 5	a	normPR distribution	ADMET	crustacean	crustacean	xgboost_character	5	Ordinary folds	overall	210	0.708074
Figure 5	a	normPR distribution	ADMET	eye_corrosion	eye_corrosion	chemberta3	3	Ordinary folds	overall	211	0.927643
Figure 5	a	normPR distribution	ADMET	eye_corrosion	eye_corrosion	dmpnn	3	Ordinary folds	overall	212	0.948951
Figure 5	a	normPR distribution	ADMET	eye_corrosion	eye_corrosion	fcnn_fingerprint	3	Ordinary folds	overall	213	0.925498
Figure 5	a	normPR distribution	ADMET	eye_corrosion	eye_corrosion	fcnn_character	3	Ordinary folds	overall	214	0.883631
Figure 5	a	normPR distribution	ADMET	eye_corrosion	eye_corrosion	molclr	3	Ordinary folds	overall	215	0.790664
Figure 5	a	normPR distribution	ADMET	eye_corrosion	eye_corrosion	xgboost_fingerprint	3	Ordinary folds	overall	216	0.918077
Figure 5	a	normPR distribution	ADMET	eye_corrosion	eye_corrosion	xgboost_character	3	Ordinary folds	overall	217	0.903586
Figure 5	a	normPR distribution	ADMET	eye_corrosion	eye_corrosion	chemberta3	4	Ordinary folds	overall	218	0.93462
Figure 5	a	normPR distribution	ADMET	eye_corrosion	eye_corrosion	dmpnn	4	Ordinary folds	overall	219	0.917456
Figure 5	a	normPR distribution	ADMET	eye_corrosion	eye_corrosion	fcnn_fingerprint	4	Ordinary folds	overall	220	0.632988
Figure 5	a	normPR distribution	ADMET	eye_corrosion	eye_corrosion	fcnn_character	4	Ordinary folds	overall	221	0.8703
Figure 5	a	normPR distribution	ADMET	eye_corrosion	eye_corrosion	molclr	4	Ordinary folds	overall	222	0.810744
Figure 5	a	normPR distribution	ADMET	eye_corrosion	eye_corrosion	xgboost_fingerprint	4	Ordinary folds	overall	223	0.765186
Figure 5	a	normPR distribution	ADMET	eye_corrosion	eye_corrosion	xgboost_character	4	Ordinary folds	overall	224	0.850102
Figure 5	a	normPR distribution	ADMET	eye_corrosion	eye_corrosion	chemberta3	6	Ordinary folds	overall	225	0.985843
Figure 5	a	normPR distribution	ADMET	eye_corrosion	eye_corrosion	dmpnn	6	Ordinary folds	overall	226	0.975496
Figure 5	a	normPR distribution	ADMET	eye_corrosion	eye_corrosion	fcnn_fingerprint	6	Ordinary folds	overall	227	0.96983
Figure 5	a	normPR distribution	ADMET	eye_corrosion	eye_corrosion	fcnn_character	6	Ordinary folds	overall	228	0.954075
Figure 5	a	normPR distribution	ADMET	eye_corrosion	eye_corrosion	molclr	6	Ordinary folds	overall	229	0.956343
Figure 5	a	normPR distribution	ADMET	eye_corrosion	eye_corrosion	xgboost_fingerprint	6	Ordinary folds	overall	230	0.922428
Figure 5	a	normPR distribution	ADMET	eye_corrosion	eye_corrosion	xgboost_character	6	Ordinary folds	overall	231	0.90579
Figure 5	a	normPR distribution	ADMET	eye_corrosion	eye_corrosion	chemberta3	7	Ordinary folds	overall	232	0.918757
Figure 5	a	normPR distribution	ADMET	eye_corrosion	eye_corrosion	dmpnn	7	Ordinary folds	overall	233	0.919078
Figure 5	a	normPR distribution	ADMET	eye_corrosion	eye_corrosion	fcnn_fingerprint	7	Ordinary folds	overall	234	0.799371
Figure 5	a	normPR distribution	ADMET	eye_corrosion	eye_corrosion	fcnn_character	7	Ordinary folds	overall	235	0.90095
Figure 5	a	normPR distribution	ADMET	eye_corrosion	eye_corrosion	molclr	7	Ordinary folds	overall	236	0.56041
Figure 5	a	normPR distribution	ADMET	eye_corrosion	eye_corrosion	xgboost_fingerprint	7	Ordinary folds	overall	237	0.756001
Figure 5	a	normPR distribution	ADMET	eye_corrosion	eye_corrosion	xgboost_character	7	Ordinary folds	overall	238	0.901082
Figure 5	a	normPR distribution	ADMET	eye_irritation	eye_irritation	chemberta3	2	Ordinary folds	overall	239	0.912637
Figure 5	a	normPR distribution	ADMET	eye_irritation	eye_irritation	dmpnn	2	Ordinary folds	overall	240	0.932087
Figure 5	a	normPR distribution	ADMET	eye_irritation	eye_irritation	fcnn_fingerprint	2	Ordinary folds	overall	241	0.907464
Figure 5	a	normPR distribution	ADMET	eye_irritation	eye_irritation	fcnn_character	2	Ordinary folds	overall	242	0.859964
Figure 5	a	normPR distribution	ADMET	eye_irritation	eye_irritation	molclr	2	Ordinary folds	overall	243	0.920186
Figure 5	a	normPR distribution	ADMET	eye_irritation	eye_irritation	xgboost_fingerprint	2	Ordinary folds	overall	244	0.879052
Figure 5	a	normPR distribution	ADMET	eye_irritation	eye_irritation	xgboost_character	2	Ordinary folds	overall	245	0.905833
Figure 5	a	normPR distribution	ADMET	eye_irritation	eye_irritation	chemberta3	3	Ordinary folds	overall	246	0.912217
Figure 5	a	normPR distribution	ADMET	eye_irritation	eye_irritation	dmpnn	3	Ordinary folds	overall	247	0.964297
Figure 5	a	normPR distribution	ADMET	eye_irritation	eye_irritation	fcnn_fingerprint	3	Ordinary folds	overall	248	0.883124
Figure 5	a	normPR distribution	ADMET	eye_irritation	eye_irritation	fcnn_character	3	Ordinary folds	overall	249	0.81975
Figure 5	a	normPR distribution	ADMET	eye_irritation	eye_irritation	molclr	3	Ordinary folds	overall	250	0.89845
Figure 5	a	normPR distribution	ADMET	eye_irritation	eye_irritation	xgboost_fingerprint	3	Ordinary folds	overall	251	0.933175
Figure 5	a	normPR distribution	ADMET	eye_irritation	eye_irritation	xgboost_character	3	Ordinary folds	overall	252	0.855029
Figure 5	a	normPR distribution	ADMET	eye_irritation	eye_irritation	chemberta3	4	Ordinary folds	overall	253	0.96487
Figure 5	a	normPR distribution	ADMET	eye_irritation	eye_irritation	dmpnn	4	Ordinary folds	overall	254	0.951641
Figure 5	a	normPR distribution	ADMET	eye_irritation	eye_irritation	fcnn_fingerprint	4	Ordinary folds	overall	255	0.896667
Figure 5	a	normPR distribution	ADMET	eye_irritation	eye_irritation	fcnn_character	4	Ordinary folds	overall	256	0.952268
Figure 5	a	normPR distribution	ADMET	eye_irritation	eye_irritation	molclr	4	Ordinary folds	overall	257	0.929026
Figure 5	a	normPR distribution	ADMET	eye_irritation	eye_irritation	xgboost_fingerprint	4	Ordinary folds	overall	258	0.933598
Figure 5	a	normPR distribution	ADMET	eye_irritation	eye_irritation	xgboost_character	4	Ordinary folds	overall	259	0.952755
Figure 5	a	normPR distribution	ADMET	eye_irritation	eye_irritation	chemberta3	5	Ordinary folds	overall	260	0.940985
Figure 5	a	normPR distribution	ADMET	eye_irritation	eye_irritation	dmpnn	5	Ordinary folds	overall	261	0.925811
Figure 5	a	normPR distribution	ADMET	eye_irritation	eye_irritation	fcnn_fingerprint	5	Ordinary folds	overall	262	0.89678
Figure 5	a	normPR distribution	ADMET	eye_irritation	eye_irritation	fcnn_character	5	Ordinary folds	overall	263	0.922263
Figure 5	a	normPR distribution	ADMET	eye_irritation	eye_irritation	molclr	5	Ordinary folds	overall	264	0.90154
Figure 5	a	normPR distribution	ADMET	eye_irritation	eye_irritation	xgboost_fingerprint	5	Ordinary folds	overall	265	0.916013
Figure 5	a	normPR distribution	ADMET	eye_irritation	eye_irritation	xgboost_character	5	Ordinary folds	overall	266	0.93421
Figure 5	a	normPR distribution	ADMET	eye_irritation	eye_irritation	chemberta3	6	Ordinary folds	overall	267	0.922876
Figure 5	a	normPR distribution	ADMET	eye_irritation	eye_irritation	dmpnn	6	Ordinary folds	overall	268	0.937669
Figure 5	a	normPR distribution	ADMET	eye_irritation	eye_irritation	fcnn_fingerprint	6	Ordinary folds	overall	269	0.918916
Figure 5	a	normPR distribution	ADMET	eye_irritation	eye_irritation	fcnn_character	6	Ordinary folds	overall	270	0.948895
Figure 5	a	normPR distribution	ADMET	eye_irritation	eye_irritation	molclr	6	Ordinary folds	overall	271	0.896413
Figure 5	a	normPR distribution	ADMET	eye_irritation	eye_irritation	xgboost_fingerprint	6	Ordinary folds	overall	272	0.892422
Figure 5	a	normPR distribution	ADMET	eye_irritation	eye_irritation	xgboost_character	6	Ordinary folds	overall	273	0.933621
Figure 5	a	normPR distribution	ADMET	eye_irritation	eye_irritation	chemberta3	7	Ordinary folds	overall	274	0.944203
Figure 5	a	normPR distribution	ADMET	eye_irritation	eye_irritation	dmpnn	7	Ordinary folds	overall	275	0.920911
Figure 5	a	normPR distribution	ADMET	eye_irritation	eye_irritation	fcnn_fingerprint	7	Ordinary folds	overall	276	0.921221
Figure 5	a	normPR distribution	ADMET	eye_irritation	eye_irritation	fcnn_character	7	Ordinary folds	overall	277	0.93285
Figure 5	a	normPR distribution	ADMET	eye_irritation	eye_irritation	molclr	7	Ordinary folds	overall	278	0.870509
Figure 5	a	normPR distribution	ADMET	eye_irritation	eye_irritation	xgboost_fingerprint	7	Ordinary folds	overall	279	0.921611
Figure 5	a	normPR distribution	ADMET	eye_irritation	eye_irritation	xgboost_character	7	Ordinary folds	overall	280	0.939008
Figure 5	a	normPR distribution	ADMET	eye_irritation	eye_irritation	chemberta3	8	Ordinary folds	overall	281	0.958668
Figure 5	a	normPR distribution	ADMET	eye_irritation	eye_irritation	dmpnn	8	Ordinary folds	overall	282	0.953304
Figure 5	a	normPR distribution	ADMET	eye_irritation	eye_irritation	fcnn_fingerprint	8	Ordinary folds	overall	283	0.914486
Figure 5	a	normPR distribution	ADMET	eye_irritation	eye_irritation	fcnn_character	8	Ordinary folds	overall	284	0.938989
Figure 5	a	normPR distribution	ADMET	eye_irritation	eye_irritation	molclr	8	Ordinary folds	overall	285	0.875917
Figure 5	a	normPR distribution	ADMET	eye_irritation	eye_irritation	xgboost_fingerprint	8	Ordinary folds	overall	286	0.947522
Figure 5	a	normPR distribution	ADMET	eye_irritation	eye_irritation	xgboost_character	8	Ordinary folds	overall	287	0.945609
Figure 5	a	normPR distribution	ADMET	eye_irritation	eye_irritation	chemberta3	9	Ordinary folds	overall	288	0.943648
Figure 5	a	normPR distribution	ADMET	eye_irritation	eye_irritation	dmpnn	9	Ordinary folds	overall	289	0.941364
Figure 5	a	normPR distribution	ADMET	eye_irritation	eye_irritation	fcnn_fingerprint	9	Ordinary folds	overall	290	0.882826
Figure 5	a	normPR distribution	ADMET	eye_irritation	eye_irritation	fcnn_character	9	Ordinary folds	overall	291	0.941288
Figure 5	a	normPR distribution	ADMET	eye_irritation	eye_irritation	molclr	9	Ordinary folds	overall	292	0.931918
Figure 5	a	normPR distribution	ADMET	eye_irritation	eye_irritation	xgboost_fingerprint	9	Ordinary folds	overall	293	0.930241
Figure 5	a	normPR distribution	ADMET	eye_irritation	eye_irritation	xgboost_character	9	Ordinary folds	overall	294	0.942918
Figure 5	a	normPR distribution	ADMET	eye_irritation	eye_irritation	chemberta3	10	Ordinary folds	overall	295	0.897987
Figure 5	a	normPR distribution	ADMET	eye_irritation	eye_irritation	dmpnn	10	Ordinary folds	overall	296	0.891687
Figure 5	a	normPR distribution	ADMET	eye_irritation	eye_irritation	fcnn_fingerprint	10	Ordinary folds	overall	297	0.746047
Figure 5	a	normPR distribution	ADMET	eye_irritation	eye_irritation	fcnn_character	10	Ordinary folds	overall	298	0.887743
Figure 5	a	normPR distribution	ADMET	eye_irritation	eye_irritation	molclr	10	Ordinary folds	overall	299	0.788112
Figure 5	a	normPR distribution	ADMET	eye_irritation	eye_irritation	xgboost_fingerprint	10	Ordinary folds	overall	300	0.819975
Figure 5	a	normPR distribution	ADMET	eye_irritation	eye_irritation	xgboost_character	10	Ordinary folds	overall	301	0.911082
Figure 5	a	normPR distribution	ADMET	h_ht	h_ht	chemberta3	2	Ordinary folds	overall	302	0.436011
Figure 5	a	normPR distribution	ADMET	h_ht	h_ht	dmpnn	2	Ordinary folds	overall	303	0.416699
Figure 5	a	normPR distribution	ADMET	h_ht	h_ht	fcnn_fingerprint	2	Ordinary folds	overall	304	0.58868
Figure 5	a	normPR distribution	ADMET	h_ht	h_ht	fcnn_character	2	Ordinary folds	overall	305	0.471521
Figure 5	a	normPR distribution	ADMET	h_ht	h_ht	molclr	2	Ordinary folds	overall	306	0.364937
Figure 5	a	normPR distribution	ADMET	h_ht	h_ht	xgboost_fingerprint	2	Ordinary folds	overall	307	0.596672
Figure 5	a	normPR distribution	ADMET	h_ht	h_ht	xgboost_character	2	Ordinary folds	overall	308	0.544396
Figure 5	a	normPR distribution	ADMET	h_ht	h_ht	chemberta3	3	Ordinary folds	overall	309	0.474989
Figure 5	a	normPR distribution	ADMET	h_ht	h_ht	dmpnn	3	Ordinary folds	overall	310	0.335777
Figure 5	a	normPR distribution	ADMET	h_ht	h_ht	fcnn_fingerprint	3	Ordinary folds	overall	311	0.551079
Figure 5	a	normPR distribution	ADMET	h_ht	h_ht	fcnn_character	3	Ordinary folds	overall	312	0.439353
Figure 5	a	normPR distribution	ADMET	h_ht	h_ht	molclr	3	Ordinary folds	overall	313	0.371064
Figure 5	a	normPR distribution	ADMET	h_ht	h_ht	xgboost_fingerprint	3	Ordinary folds	overall	314	0.544908
Figure 5	a	normPR distribution	ADMET	h_ht	h_ht	xgboost_character	3	Ordinary folds	overall	315	0.357954
Figure 5	a	normPR distribution	ADMET	h_ht	h_ht	chemberta3	4	Ordinary folds	overall	316	0.220999
Figure 5	a	normPR distribution	ADMET	h_ht	h_ht	dmpnn	4	Ordinary folds	overall	317	0.406707
Figure 5	a	normPR distribution	ADMET	h_ht	h_ht	fcnn_fingerprint	4	Ordinary folds	overall	318	0.321159
Figure 5	a	normPR distribution	ADMET	h_ht	h_ht	fcnn_character	4	Ordinary folds	overall	319	0.189433
Figure 5	a	normPR distribution	ADMET	h_ht	h_ht	molclr	4	Ordinary folds	overall	320	0.288603
Figure 5	a	normPR distribution	ADMET	h_ht	h_ht	xgboost_fingerprint	4	Ordinary folds	overall	321	0.337438
Figure 5	a	normPR distribution	ADMET	h_ht	h_ht	xgboost_character	4	Ordinary folds	overall	322	0.269122
Figure 5	a	normPR distribution	ADMET	h_ht	h_ht	chemberta3	5	Ordinary folds	overall	323	0.425442
Figure 5	a	normPR distribution	ADMET	h_ht	h_ht	dmpnn	5	Ordinary folds	overall	324	0.38601
Figure 5	a	normPR distribution	ADMET	h_ht	h_ht	fcnn_fingerprint	5	Ordinary folds	overall	325	0.485045
Figure 5	a	normPR distribution	ADMET	h_ht	h_ht	fcnn_character	5	Ordinary folds	overall	326	0.395504
Figure 5	a	normPR distribution	ADMET	h_ht	h_ht	molclr	5	Ordinary folds	overall	327	0.414351
Figure 5	a	normPR distribution	ADMET	h_ht	h_ht	xgboost_fingerprint	5	Ordinary folds	overall	328	0.430877
Figure 5	a	normPR distribution	ADMET	h_ht	h_ht	xgboost_character	5	Ordinary folds	overall	329	0.408579
Figure 5	a	normPR distribution	ADMET	h_ht	h_ht	chemberta3	6	Ordinary folds	overall	330	0.489977
Figure 5	a	normPR distribution	ADMET	h_ht	h_ht	dmpnn	6	Ordinary folds	overall	331	0.565257
Figure 5	a	normPR distribution	ADMET	h_ht	h_ht	fcnn_fingerprint	6	Ordinary folds	overall	332	0.533436
Figure 5	a	normPR distribution	ADMET	h_ht	h_ht	fcnn_character	6	Ordinary folds	overall	333	0.371945
Figure 5	a	normPR distribution	ADMET	h_ht	h_ht	molclr	6	Ordinary folds	overall	334	0.29657
Figure 5	a	normPR distribution	ADMET	h_ht	h_ht	xgboost_fingerprint	6	Ordinary folds	overall	335	0.605312
Figure 5	a	normPR distribution	ADMET	h_ht	h_ht	xgboost_character	6	Ordinary folds	overall	336	0.537732
Figure 5	a	normPR distribution	ADMET	h_ht	h_ht	chemberta3	7	Ordinary folds	overall	337	0.306756
Figure 5	a	normPR distribution	ADMET	h_ht	h_ht	dmpnn	7	Ordinary folds	overall	338	0.432916
Figure 5	a	normPR distribution	ADMET	h_ht	h_ht	fcnn_fingerprint	7	Ordinary folds	overall	339	0.405705
Figure 5	a	normPR distribution	ADMET	h_ht	h_ht	fcnn_character	7	Ordinary folds	overall	340	0.252622
Figure 5	a	normPR distribution	ADMET	h_ht	h_ht	molclr	7	Ordinary folds	overall	341	0.156027
Figure 5	a	normPR distribution	ADMET	h_ht	h_ht	xgboost_fingerprint	7	Ordinary folds	overall	342	0.444701
Figure 5	a	normPR distribution	ADMET	h_ht	h_ht	xgboost_character	7	Ordinary folds	overall	343	0.393487
Figure 5	a	normPR distribution	ADMET	micronucleus_tox	micronucleus_tox	chemberta3	2	Ordinary folds	overall	344	0.847905
Figure 5	a	normPR distribution	ADMET	micronucleus_tox	micronucleus_tox	dmpnn	2	Ordinary folds	overall	345	0.824626
Figure 5	a	normPR distribution	ADMET	micronucleus_tox	micronucleus_tox	fcnn_fingerprint	2	Ordinary folds	overall	346	0.79571
Figure 5	a	normPR distribution	ADMET	micronucleus_tox	micronucleus_tox	fcnn_character	2	Ordinary folds	overall	347	0.734687
Figure 5	a	normPR distribution	ADMET	micronucleus_tox	micronucleus_tox	molclr	2	Ordinary folds	overall	348	0.706836
Figure 5	a	normPR distribution	ADMET	micronucleus_tox	micronucleus_tox	xgboost_fingerprint	2	Ordinary folds	overall	349	0.890512
Figure 5	a	normPR distribution	ADMET	micronucleus_tox	micronucleus_tox	xgboost_character	2	Ordinary folds	overall	350	0.845834
Figure 5	a	normPR distribution	ADMET	micronucleus_tox	micronucleus_tox	chemberta3	3	Ordinary folds	overall	351	0.941487
Figure 5	a	normPR distribution	ADMET	micronucleus_tox	micronucleus_tox	dmpnn	3	Ordinary folds	overall	352	0.843073
Figure 5	a	normPR distribution	ADMET	micronucleus_tox	micronucleus_tox	fcnn_fingerprint	3	Ordinary folds	overall	353	0.859468
Figure 5	a	normPR distribution	ADMET	micronucleus_tox	micronucleus_tox	fcnn_character	3	Ordinary folds	overall	354	0.718389
Figure 5	a	normPR distribution	ADMET	micronucleus_tox	micronucleus_tox	molclr	3	Ordinary folds	overall	355	0.959539
Figure 5	a	normPR distribution	ADMET	micronucleus_tox	micronucleus_tox	xgboost_fingerprint	3	Ordinary folds	overall	356	0.891445
Figure 5	a	normPR distribution	ADMET	micronucleus_tox	micronucleus_tox	xgboost_character	3	Ordinary folds	overall	357	0.766937
Figure 5	a	normPR distribution	ADMET	micronucleus_tox	micronucleus_tox	chemberta3	4	Ordinary folds	overall	358	0.694833
Figure 5	a	normPR distribution	ADMET	micronucleus_tox	micronucleus_tox	dmpnn	4	Ordinary folds	overall	359	0.769195
Figure 5	a	normPR distribution	ADMET	micronucleus_tox	micronucleus_tox	fcnn_fingerprint	4	Ordinary folds	overall	360	0.780008
Figure 5	a	normPR distribution	ADMET	micronucleus_tox	micronucleus_tox	fcnn_character	4	Ordinary folds	overall	361	0.689327
Figure 5	a	normPR distribution	ADMET	micronucleus_tox	micronucleus_tox	molclr	4	Ordinary folds	overall	362	0.766331
Figure 5	a	normPR distribution	ADMET	micronucleus_tox	micronucleus_tox	xgboost_fingerprint	4	Ordinary folds	overall	363	0.78929
Figure 5	a	normPR distribution	ADMET	micronucleus_tox	micronucleus_tox	xgboost_character	4	Ordinary folds	overall	364	0.61724
Figure 5	a	normPR distribution	ADMET	micronucleus_tox	micronucleus_tox	chemberta3	5	Ordinary folds	overall	365	0.677885
Figure 5	a	normPR distribution	ADMET	micronucleus_tox	micronucleus_tox	dmpnn	5	Ordinary folds	overall	366	0.82352
Figure 5	a	normPR distribution	ADMET	micronucleus_tox	micronucleus_tox	fcnn_fingerprint	5	Ordinary folds	overall	367	0.771418
Figure 5	a	normPR distribution	ADMET	micronucleus_tox	micronucleus_tox	fcnn_character	5	Ordinary folds	overall	368	0.692107
Figure 5	a	normPR distribution	ADMET	micronucleus_tox	micronucleus_tox	molclr	5	Ordinary folds	overall	369	0.887947
Figure 5	a	normPR distribution	ADMET	micronucleus_tox	micronucleus_tox	xgboost_fingerprint	5	Ordinary folds	overall	370	0.727761
Figure 5	a	normPR distribution	ADMET	micronucleus_tox	micronucleus_tox	xgboost_character	5	Ordinary folds	overall	371	0.805277
Figure 5	a	normPR distribution	ADMET	nr_ahr	nr_ahr	chemberta3	2	Ordinary folds	overall	372	0.654958
Figure 5	a	normPR distribution	ADMET	nr_ahr	nr_ahr	dmpnn	2	Ordinary folds	overall	373	0.722348
Figure 5	a	normPR distribution	ADMET	nr_ahr	nr_ahr	fcnn_fingerprint	2	Ordinary folds	overall	374	0.590918
Figure 5	a	normPR distribution	ADMET	nr_ahr	nr_ahr	fcnn_character	2	Ordinary folds	overall	375	0.615762
Figure 5	a	normPR distribution	ADMET	nr_ahr	nr_ahr	molclr	2	Ordinary folds	overall	376	0.596498
Figure 5	a	normPR distribution	ADMET	nr_ahr	nr_ahr	xgboost_fingerprint	2	Ordinary folds	overall	377	0.700902
Figure 5	a	normPR distribution	ADMET	nr_ahr	nr_ahr	xgboost_character	2	Ordinary folds	overall	378	0.632168
Figure 5	a	normPR distribution	ADMET	nr_ahr	nr_ahr	chemberta3	3	Ordinary folds	overall	379	0.592145
Figure 5	a	normPR distribution	ADMET	nr_ahr	nr_ahr	dmpnn	3	Ordinary folds	overall	380	0.667469
Figure 5	a	normPR distribution	ADMET	nr_ahr	nr_ahr	fcnn_fingerprint	3	Ordinary folds	overall	381	0.589002
Figure 5	a	normPR distribution	ADMET	nr_ahr	nr_ahr	fcnn_character	3	Ordinary folds	overall	382	0.700276
Figure 5	a	normPR distribution	ADMET	nr_ahr	nr_ahr	molclr	3	Ordinary folds	overall	383	0.748692
Figure 5	a	normPR distribution	ADMET	nr_ahr	nr_ahr	xgboost_fingerprint	3	Ordinary folds	overall	384	0.589105
Figure 5	a	normPR distribution	ADMET	nr_ahr	nr_ahr	xgboost_character	3	Ordinary folds	overall	385	0.656588
Figure 5	a	normPR distribution	ADMET	nr_ahr	nr_ahr	chemberta3	4	Ordinary folds	overall	386	0.534053
Figure 5	a	normPR distribution	ADMET	nr_ahr	nr_ahr	dmpnn	4	Ordinary folds	overall	387	0.497715
Figure 5	a	normPR distribution	ADMET	nr_ahr	nr_ahr	fcnn_fingerprint	4	Ordinary folds	overall	388	0.528917
Figure 5	a	normPR distribution	ADMET	nr_ahr	nr_ahr	fcnn_character	4	Ordinary folds	overall	389	0.548649
Figure 5	a	normPR distribution	ADMET	nr_ahr	nr_ahr	molclr	4	Ordinary folds	overall	390	0.458712
Figure 5	a	normPR distribution	ADMET	nr_ahr	nr_ahr	xgboost_fingerprint	4	Ordinary folds	overall	391	0.490024
Figure 5	a	normPR distribution	ADMET	nr_ahr	nr_ahr	xgboost_character	4	Ordinary folds	overall	392	0.498655
Figure 5	a	normPR distribution	ADMET	nr_ahr	nr_ahr	chemberta3	5	Ordinary folds	overall	393	0.464573
Figure 5	a	normPR distribution	ADMET	nr_ahr	nr_ahr	dmpnn	5	Ordinary folds	overall	394	0.496405
Figure 5	a	normPR distribution	ADMET	nr_ahr	nr_ahr	fcnn_fingerprint	5	Ordinary folds	overall	395	0.372745
Figure 5	a	normPR distribution	ADMET	nr_ahr	nr_ahr	fcnn_character	5	Ordinary folds	overall	396	0.485644
Figure 5	a	normPR distribution	ADMET	nr_ahr	nr_ahr	molclr	5	Ordinary folds	overall	397	0.538544
Figure 5	a	normPR distribution	ADMET	nr_ahr	nr_ahr	xgboost_fingerprint	5	Ordinary folds	overall	398	0.460135
Figure 5	a	normPR distribution	ADMET	nr_ahr	nr_ahr	xgboost_character	5	Ordinary folds	overall	399	0.384892
Figure 5	a	normPR distribution	ADMET	nr_ahr	nr_ahr	chemberta3	6	Ordinary folds	overall	400	0.337824
Figure 5	a	normPR distribution	ADMET	nr_ahr	nr_ahr	dmpnn	6	Ordinary folds	overall	401	0.545768
Figure 5	a	normPR distribution	ADMET	nr_ahr	nr_ahr	fcnn_fingerprint	6	Ordinary folds	overall	402	0.355566
Figure 5	a	normPR distribution	ADMET	nr_ahr	nr_ahr	fcnn_character	6	Ordinary folds	overall	403	0.353573
Figure 5	a	normPR distribution	ADMET	nr_ahr	nr_ahr	molclr	6	Ordinary folds	overall	404	0.435679
Figure 5	a	normPR distribution	ADMET	nr_ahr	nr_ahr	xgboost_fingerprint	6	Ordinary folds	overall	405	0.410253
Figure 5	a	normPR distribution	ADMET	nr_ahr	nr_ahr	xgboost_character	6	Ordinary folds	overall	406	0.418331
Figure 5	a	normPR distribution	ADMET	nr_ahr	nr_ahr	chemberta3	7	Ordinary folds	overall	407	0.462797
Figure 5	a	normPR distribution	ADMET	nr_ahr	nr_ahr	dmpnn	7	Ordinary folds	overall	408	0.514356
Figure 5	a	normPR distribution	ADMET	nr_ahr	nr_ahr	fcnn_fingerprint	7	Ordinary folds	overall	409	0.411022
Figure 5	a	normPR distribution	ADMET	nr_ahr	nr_ahr	fcnn_character	7	Ordinary folds	overall	410	0.444828
Figure 5	a	normPR distribution	ADMET	nr_ahr	nr_ahr	molclr	7	Ordinary folds	overall	411	0.532761
Figure 5	a	normPR distribution	ADMET	nr_ahr	nr_ahr	xgboost_fingerprint	7	Ordinary folds	overall	412	0.485627
Figure 5	a	normPR distribution	ADMET	nr_ahr	nr_ahr	xgboost_character	7	Ordinary folds	overall	413	0.367869
Figure 5	a	normPR distribution	ADMET	nr_ahr	nr_ahr	chemberta3	8	Ordinary folds	overall	414	0.339897
Figure 5	a	normPR distribution	ADMET	nr_ahr	nr_ahr	dmpnn	8	Ordinary folds	overall	415	0.470674
Figure 5	a	normPR distribution	ADMET	nr_ahr	nr_ahr	fcnn_fingerprint	8	Ordinary folds	overall	416	0.33909
Figure 5	a	normPR distribution	ADMET	nr_ahr	nr_ahr	fcnn_character	8	Ordinary folds	overall	417	0.428322
Figure 5	a	normPR distribution	ADMET	nr_ahr	nr_ahr	molclr	8	Ordinary folds	overall	418	0.325128
Figure 5	a	normPR distribution	ADMET	nr_ahr	nr_ahr	xgboost_fingerprint	8	Ordinary folds	overall	419	0.131964
Figure 5	a	normPR distribution	ADMET	nr_ahr	nr_ahr	xgboost_character	8	Ordinary folds	overall	420	0.338441
Figure 5	a	normPR distribution	ADMET	nr_ahr	nr_ahr	chemberta3	9	Ordinary folds	overall	421	0.345305
Figure 5	a	normPR distribution	ADMET	nr_ahr	nr_ahr	dmpnn	9	Ordinary folds	overall	422	0.372563
Figure 5	a	normPR distribution	ADMET	nr_ahr	nr_ahr	fcnn_fingerprint	9	Ordinary folds	overall	423	0.319439
Figure 5	a	normPR distribution	ADMET	nr_ahr	nr_ahr	fcnn_character	9	Ordinary folds	overall	424	0.369263
Figure 5	a	normPR distribution	ADMET	nr_ahr	nr_ahr	molclr	9	Ordinary folds	overall	425	0.35916
Figure 5	a	normPR distribution	ADMET	nr_ahr	nr_ahr	xgboost_fingerprint	9	Ordinary folds	overall	426	0.311019
Figure 5	a	normPR distribution	ADMET	nr_ahr	nr_ahr	xgboost_character	9	Ordinary folds	overall	427	0.236525
Figure 5	a	normPR distribution	ADMET	nr_ahr	nr_ahr	chemberta3	10	Ordinary folds	overall	428	0.528274
Figure 5	a	normPR distribution	ADMET	nr_ahr	nr_ahr	dmpnn	10	Ordinary folds	overall	429	0.448934
Figure 5	a	normPR distribution	ADMET	nr_ahr	nr_ahr	fcnn_fingerprint	10	Ordinary folds	overall	430	0.489247
Figure 5	a	normPR distribution	ADMET	nr_ahr	nr_ahr	fcnn_character	10	Ordinary folds	overall	431	0.532968
Figure 5	a	normPR distribution	ADMET	nr_ahr	nr_ahr	molclr	10	Ordinary folds	overall	432	0.542678
Figure 5	a	normPR distribution	ADMET	nr_ahr	nr_ahr	xgboost_fingerprint	10	Ordinary folds	overall	433	0.556591
Figure 5	a	normPR distribution	ADMET	nr_ahr	nr_ahr	xgboost_character	10	Ordinary folds	overall	434	0.503448
Figure 5	a	normPR distribution	ADMET	nr_ar	nr_ar	chemberta3	2	Ordinary folds	overall	435	0.392269
Figure 5	a	normPR distribution	ADMET	nr_ar	nr_ar	dmpnn	2	Ordinary folds	overall	436	0.469676
Figure 5	a	normPR distribution	ADMET	nr_ar	nr_ar	fcnn_fingerprint	2	Ordinary folds	overall	437	0.321579
Figure 5	a	normPR distribution	ADMET	nr_ar	nr_ar	fcnn_character	2	Ordinary folds	overall	438	0.387522
Figure 5	a	normPR distribution	ADMET	nr_ar	nr_ar	molclr	2	Ordinary folds	overall	439	0.404042
Figure 5	a	normPR distribution	ADMET	nr_ar	nr_ar	xgboost_fingerprint	2	Ordinary folds	overall	440	0.424142
Figure 5	a	normPR distribution	ADMET	nr_ar	nr_ar	xgboost_character	2	Ordinary folds	overall	441	0.505302
Figure 5	a	normPR distribution	ADMET	nr_ar	nr_ar	chemberta3	3	Ordinary folds	overall	442	0.558849
Figure 5	a	normPR distribution	ADMET	nr_ar	nr_ar	dmpnn	3	Ordinary folds	overall	443	0.613718
Figure 5	a	normPR distribution	ADMET	nr_ar	nr_ar	fcnn_fingerprint	3	Ordinary folds	overall	444	0.587432
Figure 5	a	normPR distribution	ADMET	nr_ar	nr_ar	fcnn_character	3	Ordinary folds	overall	445	0.618561
Figure 5	a	normPR distribution	ADMET	nr_ar	nr_ar	molclr	3	Ordinary folds	overall	446	0.56613
Figure 5	a	normPR distribution	ADMET	nr_ar	nr_ar	xgboost_fingerprint	3	Ordinary folds	overall	447	0.68443
Figure 5	a	normPR distribution	ADMET	nr_ar	nr_ar	xgboost_character	3	Ordinary folds	overall	448	0.593749
Figure 5	a	normPR distribution	ADMET	nr_ar	nr_ar	chemberta3	4	Ordinary folds	overall	449	0.480425
Figure 5	a	normPR distribution	ADMET	nr_ar	nr_ar	dmpnn	4	Ordinary folds	overall	450	0.50907
Figure 5	a	normPR distribution	ADMET	nr_ar	nr_ar	fcnn_fingerprint	4	Ordinary folds	overall	451	0.51715
Figure 5	a	normPR distribution	ADMET	nr_ar	nr_ar	fcnn_character	4	Ordinary folds	overall	452	0.441825
Figure 5	a	normPR distribution	ADMET	nr_ar	nr_ar	molclr	4	Ordinary folds	overall	453	0.446274
Figure 5	a	normPR distribution	ADMET	nr_ar	nr_ar	xgboost_fingerprint	4	Ordinary folds	overall	454	0.51599
Figure 5	a	normPR distribution	ADMET	nr_ar	nr_ar	xgboost_character	4	Ordinary folds	overall	455	0.539183
Figure 5	a	normPR distribution	ADMET	nr_ar	nr_ar	chemberta3	5	Ordinary folds	overall	456	0.40006
Figure 5	a	normPR distribution	ADMET	nr_ar	nr_ar	dmpnn	5	Ordinary folds	overall	457	0.521777
Figure 5	a	normPR distribution	ADMET	nr_ar	nr_ar	fcnn_fingerprint	5	Ordinary folds	overall	458	0.505716
Figure 5	a	normPR distribution	ADMET	nr_ar	nr_ar	fcnn_character	5	Ordinary folds	overall	459	0.497205
Figure 5	a	normPR distribution	ADMET	nr_ar	nr_ar	molclr	5	Ordinary folds	overall	460	0.385681
Figure 5	a	normPR distribution	ADMET	nr_ar	nr_ar	xgboost_fingerprint	5	Ordinary folds	overall	461	0.421484
Figure 5	a	normPR distribution	ADMET	nr_ar	nr_ar	xgboost_character	5	Ordinary folds	overall	462	0.300335
Figure 5	a	normPR distribution	ADMET	nr_ar	nr_ar	chemberta3	6	Ordinary folds	overall	463	0.675391
Figure 5	a	normPR distribution	ADMET	nr_ar	nr_ar	dmpnn	6	Ordinary folds	overall	464	0.596496
Figure 5	a	normPR distribution	ADMET	nr_ar	nr_ar	fcnn_fingerprint	6	Ordinary folds	overall	465	0.634496
Figure 5	a	normPR distribution	ADMET	nr_ar	nr_ar	fcnn_character	6	Ordinary folds	overall	466	0.683578
Figure 5	a	normPR distribution	ADMET	nr_ar	nr_ar	molclr	6	Ordinary folds	overall	467	0.657801
Figure 5	a	normPR distribution	ADMET	nr_ar	nr_ar	xgboost_fingerprint	6	Ordinary folds	overall	468	0.659386
Figure 5	a	normPR distribution	ADMET	nr_ar	nr_ar	xgboost_character	6	Ordinary folds	overall	469	0.661887
Figure 5	a	normPR distribution	ADMET	nr_ar	nr_ar	chemberta3	7	Ordinary folds	overall	470	0.910365
Figure 5	a	normPR distribution	ADMET	nr_ar	nr_ar	dmpnn	7	Ordinary folds	overall	471	0.852036
Figure 5	a	normPR distribution	ADMET	nr_ar	nr_ar	fcnn_fingerprint	7	Ordinary folds	overall	472	0.894112
Figure 5	a	normPR distribution	ADMET	nr_ar	nr_ar	fcnn_character	7	Ordinary folds	overall	473	0.904485
Figure 5	a	normPR distribution	ADMET	nr_ar	nr_ar	molclr	7	Ordinary folds	overall	474	0.900867
Figure 5	a	normPR distribution	ADMET	nr_ar	nr_ar	xgboost_fingerprint	7	Ordinary folds	overall	475	0.900423
Figure 5	a	normPR distribution	ADMET	nr_ar	nr_ar	xgboost_character	7	Ordinary folds	overall	476	0.903392
Figure 5	a	normPR distribution	ADMET	nr_ar	nr_ar	chemberta3	8	Ordinary folds	overall	477	0.223743
Figure 5	a	normPR distribution	ADMET	nr_ar	nr_ar	dmpnn	8	Ordinary folds	overall	478	0.177326
Figure 5	a	normPR distribution	ADMET	nr_ar	nr_ar	fcnn_fingerprint	8	Ordinary folds	overall	479	0.201195
Figure 5	a	normPR distribution	ADMET	nr_ar	nr_ar	fcnn_character	8	Ordinary folds	overall	480	0.180569
Figure 5	a	normPR distribution	ADMET	nr_ar	nr_ar	molclr	8	Ordinary folds	overall	481	0.183763
Figure 5	a	normPR distribution	ADMET	nr_ar	nr_ar	xgboost_fingerprint	8	Ordinary folds	overall	482	0.182802
Figure 5	a	normPR distribution	ADMET	nr_ar	nr_ar	xgboost_character	8	Ordinary folds	overall	483	0.215193
Figure 5	a	normPR distribution	ADMET	nr_ar	nr_ar	chemberta3	9	Ordinary folds	overall	484	0.220134
Figure 5	a	normPR distribution	ADMET	nr_ar	nr_ar	dmpnn	9	Ordinary folds	overall	485	0.108153
Figure 5	a	normPR distribution	ADMET	nr_ar	nr_ar	fcnn_fingerprint	9	Ordinary folds	overall	486	0.153562
Figure 5	a	normPR distribution	ADMET	nr_ar	nr_ar	fcnn_character	9	Ordinary folds	overall	487	0.172696
Figure 5	a	normPR distribution	ADMET	nr_ar	nr_ar	molclr	9	Ordinary folds	overall	488	0.210594
Figure 5	a	normPR distribution	ADMET	nr_ar	nr_ar	xgboost_fingerprint	9	Ordinary folds	overall	489	0.127044
Figure 5	a	normPR distribution	ADMET	nr_ar	nr_ar	xgboost_character	9	Ordinary folds	overall	490	0.201327
Figure 5	a	normPR distribution	ADMET	nr_ar	nr_ar	chemberta3	10	Ordinary folds	overall	491	0.635719
Figure 5	a	normPR distribution	ADMET	nr_ar	nr_ar	dmpnn	10	Ordinary folds	overall	492	0.5788
Figure 5	a	normPR distribution	ADMET	nr_ar	nr_ar	fcnn_fingerprint	10	Ordinary folds	overall	493	0.590692
Figure 5	a	normPR distribution	ADMET	nr_ar	nr_ar	fcnn_character	10	Ordinary folds	overall	494	0.532719
Figure 5	a	normPR distribution	ADMET	nr_ar	nr_ar	molclr	10	Ordinary folds	overall	495	0.590398
Figure 5	a	normPR distribution	ADMET	nr_ar	nr_ar	xgboost_fingerprint	10	Ordinary folds	overall	496	0.589582
Figure 5	a	normPR distribution	ADMET	nr_ar	nr_ar	xgboost_character	10	Ordinary folds	overall	497	0.544357
Figure 5	a	normPR distribution	ADMET	nr_ar_lbd	nr_ar_lbd	chemberta3	4	Ordinary folds	overall	498	0.476718
Figure 5	a	normPR distribution	ADMET	nr_ar_lbd	nr_ar_lbd	dmpnn	4	Ordinary folds	overall	499	0.235953
Figure 5	a	normPR distribution	ADMET	nr_ar_lbd	nr_ar_lbd	fcnn_fingerprint	4	Ordinary folds	overall	500	0.561388
Figure 5	a	normPR distribution	ADMET	nr_ar_lbd	nr_ar_lbd	fcnn_character	4	Ordinary folds	overall	501	0.546937
Figure 5	a	normPR distribution	ADMET	nr_ar_lbd	nr_ar_lbd	molclr	4	Ordinary folds	overall	502	0.294242
Figure 5	a	normPR distribution	ADMET	nr_ar_lbd	nr_ar_lbd	xgboost_fingerprint	4	Ordinary folds	overall	503	0.575122
Figure 5	a	normPR distribution	ADMET	nr_ar_lbd	nr_ar_lbd	xgboost_character	4	Ordinary folds	overall	504	0.561722
Figure 5	a	normPR distribution	ADMET	nr_ar_lbd	nr_ar_lbd	chemberta3	6	Ordinary folds	overall	505	0.838736
Figure 5	a	normPR distribution	ADMET	nr_ar_lbd	nr_ar_lbd	dmpnn	6	Ordinary folds	overall	506	0.850566
Figure 5	a	normPR distribution	ADMET	nr_ar_lbd	nr_ar_lbd	fcnn_fingerprint	6	Ordinary folds	overall	507	0.855847
Figure 5	a	normPR distribution	ADMET	nr_ar_lbd	nr_ar_lbd	fcnn_character	6	Ordinary folds	overall	508	0.824106
Figure 5	a	normPR distribution	ADMET	nr_ar_lbd	nr_ar_lbd	molclr	6	Ordinary folds	overall	509	0.813532
Figure 5	a	normPR distribution	ADMET	nr_ar_lbd	nr_ar_lbd	xgboost_fingerprint	6	Ordinary folds	overall	510	0.8383
Figure 5	a	normPR distribution	ADMET	nr_ar_lbd	nr_ar_lbd	xgboost_character	6	Ordinary folds	overall	511	0.812105
Figure 5	a	normPR distribution	ADMET	nr_ar_lbd	nr_ar_lbd	chemberta3	7	Ordinary folds	overall	512	0.116381
Figure 5	a	normPR distribution	ADMET	nr_ar_lbd	nr_ar_lbd	dmpnn	7	Ordinary folds	overall	513	0.0938312
Figure 5	a	normPR distribution	ADMET	nr_ar_lbd	nr_ar_lbd	fcnn_fingerprint	7	Ordinary folds	overall	514	0.0535718
Figure 5	a	normPR distribution	ADMET	nr_ar_lbd	nr_ar_lbd	fcnn_character	7	Ordinary folds	overall	515	0.103898
Figure 5	a	normPR distribution	ADMET	nr_ar_lbd	nr_ar_lbd	molclr	7	Ordinary folds	overall	516	0.0977296
Figure 5	a	normPR distribution	ADMET	nr_ar_lbd	nr_ar_lbd	xgboost_fingerprint	7	Ordinary folds	overall	517	0.0786908
Figure 5	a	normPR distribution	ADMET	nr_ar_lbd	nr_ar_lbd	xgboost_character	7	Ordinary folds	overall	518	0.152729
Figure 5	a	normPR distribution	ADMET	nr_ar_lbd	nr_ar_lbd	chemberta3	8	Ordinary folds	overall	519	0.795955
Figure 5	a	normPR distribution	ADMET	nr_ar_lbd	nr_ar_lbd	dmpnn	8	Ordinary folds	overall	520	0.831244
Figure 5	a	normPR distribution	ADMET	nr_ar_lbd	nr_ar_lbd	fcnn_fingerprint	8	Ordinary folds	overall	521	0.817362
Figure 5	a	normPR distribution	ADMET	nr_ar_lbd	nr_ar_lbd	fcnn_character	8	Ordinary folds	overall	522	0.827733
Figure 5	a	normPR distribution	ADMET	nr_ar_lbd	nr_ar_lbd	molclr	8	Ordinary folds	overall	523	0.370056
Figure 5	a	normPR distribution	ADMET	nr_ar_lbd	nr_ar_lbd	xgboost_fingerprint	8	Ordinary folds	overall	524	0.862338
Figure 5	a	normPR distribution	ADMET	nr_ar_lbd	nr_ar_lbd	xgboost_character	8	Ordinary folds	overall	525	0.84721
Figure 5	a	normPR distribution	ADMET	nr_ar_lbd	nr_ar_lbd	chemberta3	9	Ordinary folds	overall	526	0.542967
Figure 5	a	normPR distribution	ADMET	nr_ar_lbd	nr_ar_lbd	dmpnn	9	Ordinary folds	overall	527	0.686817
Figure 5	a	normPR distribution	ADMET	nr_ar_lbd	nr_ar_lbd	fcnn_fingerprint	9	Ordinary folds	overall	528	0.667231
Figure 5	a	normPR distribution	ADMET	nr_ar_lbd	nr_ar_lbd	fcnn_character	9	Ordinary folds	overall	529	0.403712
Figure 5	a	normPR distribution	ADMET	nr_ar_lbd	nr_ar_lbd	molclr	9	Ordinary folds	overall	530	0.557974
Figure 5	a	normPR distribution	ADMET	nr_ar_lbd	nr_ar_lbd	xgboost_fingerprint	9	Ordinary folds	overall	531	0.719224
Figure 5	a	normPR distribution	ADMET	nr_ar_lbd	nr_ar_lbd	xgboost_character	9	Ordinary folds	overall	532	0.453924
Figure 5	a	normPR distribution	ADMET	nr_ar_lbd	nr_ar_lbd	chemberta3	10	Ordinary folds	overall	533	0.376922
Figure 5	a	normPR distribution	ADMET	nr_ar_lbd	nr_ar_lbd	dmpnn	10	Ordinary folds	overall	534	0.444221
Figure 5	a	normPR distribution	ADMET	nr_ar_lbd	nr_ar_lbd	fcnn_fingerprint	10	Ordinary folds	overall	535	0.317052
Figure 5	a	normPR distribution	ADMET	nr_ar_lbd	nr_ar_lbd	fcnn_character	10	Ordinary folds	overall	536	0.440798
Figure 5	a	normPR distribution	ADMET	nr_ar_lbd	nr_ar_lbd	molclr	10	Ordinary folds	overall	537	0.386331
Figure 5	a	normPR distribution	ADMET	nr_ar_lbd	nr_ar_lbd	xgboost_fingerprint	10	Ordinary folds	overall	538	0.391559
Figure 5	a	normPR distribution	ADMET	nr_ar_lbd	nr_ar_lbd	xgboost_character	10	Ordinary folds	overall	539	0.461697
Figure 5	a	normPR distribution	ADMET	nr_aromatase	nr_aromatase	chemberta3	2	Ordinary folds	overall	540	0.558705
Figure 5	a	normPR distribution	ADMET	nr_aromatase	nr_aromatase	dmpnn	2	Ordinary folds	overall	541	0.538585
Figure 5	a	normPR distribution	ADMET	nr_aromatase	nr_aromatase	fcnn_fingerprint	2	Ordinary folds	overall	542	0.384611
Figure 5	a	normPR distribution	ADMET	nr_aromatase	nr_aromatase	fcnn_character	2	Ordinary folds	overall	543	0.339384
Figure 5	a	normPR distribution	ADMET	nr_aromatase	nr_aromatase	molclr	2	Ordinary folds	overall	544	0.150203
Figure 5	a	normPR distribution	ADMET	nr_aromatase	nr_aromatase	xgboost_fingerprint	2	Ordinary folds	overall	545	0.450613
Figure 5	a	normPR distribution	ADMET	nr_aromatase	nr_aromatase	xgboost_character	2	Ordinary folds	overall	546	0.517966
Figure 5	a	normPR distribution	ADMET	nr_aromatase	nr_aromatase	chemberta3	3	Ordinary folds	overall	547	0.258246
Figure 5	a	normPR distribution	ADMET	nr_aromatase	nr_aromatase	dmpnn	3	Ordinary folds	overall	548	0.229598
Figure 5	a	normPR distribution	ADMET	nr_aromatase	nr_aromatase	fcnn_fingerprint	3	Ordinary folds	overall	549	0.10785
Figure 5	a	normPR distribution	ADMET	nr_aromatase	nr_aromatase	fcnn_character	3	Ordinary folds	overall	550	0.096077
Figure 5	a	normPR distribution	ADMET	nr_aromatase	nr_aromatase	molclr	3	Ordinary folds	overall	551	0.0844815
Figure 5	a	normPR distribution	ADMET	nr_aromatase	nr_aromatase	xgboost_fingerprint	3	Ordinary folds	overall	552	0.137959
Figure 5	a	normPR distribution	ADMET	nr_aromatase	nr_aromatase	xgboost_character	3	Ordinary folds	overall	553	0.0781731
Figure 5	a	normPR distribution	ADMET	nr_aromatase	nr_aromatase	chemberta3	4	Ordinary folds	overall	554	0.0906777
Figure 5	a	normPR distribution	ADMET	nr_aromatase	nr_aromatase	dmpnn	4	Ordinary folds	overall	555	0.0623186
Figure 5	a	normPR distribution	ADMET	nr_aromatase	nr_aromatase	fcnn_fingerprint	4	Ordinary folds	overall	556	0.098235
Figure 5	a	normPR distribution	ADMET	nr_aromatase	nr_aromatase	fcnn_character	4	Ordinary folds	overall	557	0.118489
Figure 5	a	normPR distribution	ADMET	nr_aromatase	nr_aromatase	molclr	4	Ordinary folds	overall	558	0.122973
Figure 5	a	normPR distribution	ADMET	nr_aromatase	nr_aromatase	xgboost_fingerprint	4	Ordinary folds	overall	559	0.0585318
Figure 5	a	normPR distribution	ADMET	nr_aromatase	nr_aromatase	xgboost_character	4	Ordinary folds	overall	560	0.17709
Figure 5	a	normPR distribution	ADMET	nr_aromatase	nr_aromatase	chemberta3	5	Ordinary folds	overall	561	0.181602
Figure 5	a	normPR distribution	ADMET	nr_aromatase	nr_aromatase	dmpnn	5	Ordinary folds	overall	562	0.17594
Figure 5	a	normPR distribution	ADMET	nr_aromatase	nr_aromatase	fcnn_fingerprint	5	Ordinary folds	overall	563	0.144463
Figure 5	a	normPR distribution	ADMET	nr_aromatase	nr_aromatase	fcnn_character	5	Ordinary folds	overall	564	0.125321
Figure 5	a	normPR distribution	ADMET	nr_aromatase	nr_aromatase	molclr	5	Ordinary folds	overall	565	0.166585
Figure 5	a	normPR distribution	ADMET	nr_aromatase	nr_aromatase	xgboost_fingerprint	5	Ordinary folds	overall	566	0.155833
Figure 5	a	normPR distribution	ADMET	nr_aromatase	nr_aromatase	xgboost_character	5	Ordinary folds	overall	567	0.242728
Figure 5	a	normPR distribution	ADMET	nr_aromatase	nr_aromatase	chemberta3	6	Ordinary folds	overall	568	0.230191
Figure 5	a	normPR distribution	ADMET	nr_aromatase	nr_aromatase	dmpnn	6	Ordinary folds	overall	569	0.240882
Figure 5	a	normPR distribution	ADMET	nr_aromatase	nr_aromatase	fcnn_fingerprint	6	Ordinary folds	overall	570	0.135926
Figure 5	a	normPR distribution	ADMET	nr_aromatase	nr_aromatase	fcnn_character	6	Ordinary folds	overall	571	0.36412
Figure 5	a	normPR distribution	ADMET	nr_aromatase	nr_aromatase	molclr	6	Ordinary folds	overall	572	0.359183
Figure 5	a	normPR distribution	ADMET	nr_aromatase	nr_aromatase	xgboost_fingerprint	6	Ordinary folds	overall	573	0.38622
Figure 5	a	normPR distribution	ADMET	nr_aromatase	nr_aromatase	xgboost_character	6	Ordinary folds	overall	574	0.420011
Figure 5	a	normPR distribution	ADMET	nr_aromatase	nr_aromatase	chemberta3	7	Ordinary folds	overall	575	0.146353
Figure 5	a	normPR distribution	ADMET	nr_aromatase	nr_aromatase	dmpnn	7	Ordinary folds	overall	576	0.254661
Figure 5	a	normPR distribution	ADMET	nr_aromatase	nr_aromatase	fcnn_fingerprint	7	Ordinary folds	overall	577	0.103516
Figure 5	a	normPR distribution	ADMET	nr_aromatase	nr_aromatase	fcnn_character	7	Ordinary folds	overall	578	0.179296
Figure 5	a	normPR distribution	ADMET	nr_aromatase	nr_aromatase	molclr	7	Ordinary folds	overall	579	0.298878
Figure 5	a	normPR distribution	ADMET	nr_aromatase	nr_aromatase	xgboost_fingerprint	7	Ordinary folds	overall	580	0.206178
Figure 5	a	normPR distribution	ADMET	nr_aromatase	nr_aromatase	xgboost_character	7	Ordinary folds	overall	581	0.197014
Figure 5	a	normPR distribution	ADMET	nr_aromatase	nr_aromatase	chemberta3	8	Ordinary folds	overall	582	0.609498
Figure 5	a	normPR distribution	ADMET	nr_aromatase	nr_aromatase	dmpnn	8	Ordinary folds	overall	583	0.528412
Figure 5	a	normPR distribution	ADMET	nr_aromatase	nr_aromatase	fcnn_fingerprint	8	Ordinary folds	overall	584	0.385947
Figure 5	a	normPR distribution	ADMET	nr_aromatase	nr_aromatase	fcnn_character	8	Ordinary folds	overall	585	0.506171
Figure 5	a	normPR distribution	ADMET	nr_aromatase	nr_aromatase	molclr	8	Ordinary folds	overall	586	0.124153
Figure 5	a	normPR distribution	ADMET	nr_aromatase	nr_aromatase	xgboost_fingerprint	8	Ordinary folds	overall	587	0.556298
Figure 5	a	normPR distribution	ADMET	nr_aromatase	nr_aromatase	xgboost_character	8	Ordinary folds	overall	588	0.500554
Figure 5	a	normPR distribution	ADMET	nr_aromatase	nr_aromatase	chemberta3	9	Ordinary folds	overall	589	0.161658
Figure 5	a	normPR distribution	ADMET	nr_aromatase	nr_aromatase	dmpnn	9	Ordinary folds	overall	590	0.229359
Figure 5	a	normPR distribution	ADMET	nr_aromatase	nr_aromatase	fcnn_fingerprint	9	Ordinary folds	overall	591	0.0541003
Figure 5	a	normPR distribution	ADMET	nr_aromatase	nr_aromatase	fcnn_character	9	Ordinary folds	overall	592	0.14397
Figure 5	a	normPR distribution	ADMET	nr_aromatase	nr_aromatase	molclr	9	Ordinary folds	overall	593	0.118922
Figure 5	a	normPR distribution	ADMET	nr_aromatase	nr_aromatase	xgboost_fingerprint	9	Ordinary folds	overall	594	0.226535
Figure 5	a	normPR distribution	ADMET	nr_aromatase	nr_aromatase	xgboost_character	9	Ordinary folds	overall	595	0.0525222
Figure 5	a	normPR distribution	ADMET	nr_aromatase	nr_aromatase	chemberta3	10	Ordinary folds	overall	596	0.363917
Figure 5	a	normPR distribution	ADMET	nr_aromatase	nr_aromatase	dmpnn	10	Ordinary folds	overall	597	0.245248
Figure 5	a	normPR distribution	ADMET	nr_aromatase	nr_aromatase	fcnn_fingerprint	10	Ordinary folds	overall	598	0.216646
Figure 5	a	normPR distribution	ADMET	nr_aromatase	nr_aromatase	fcnn_character	10	Ordinary folds	overall	599	0.132899
Figure 5	a	normPR distribution	ADMET	nr_aromatase	nr_aromatase	molclr	10	Ordinary folds	overall	600	0.167684
Figure 5	a	normPR distribution	ADMET	nr_aromatase	nr_aromatase	xgboost_fingerprint	10	Ordinary folds	overall	601	0.15875
Figure 5	a	normPR distribution	ADMET	nr_aromatase	nr_aromatase	xgboost_character	10	Ordinary folds	overall	602	0.122457
Figure 5	a	normPR distribution	ADMET	nr_er	nr_er	chemberta3	2	Ordinary folds	overall	603	0.320797
Figure 5	a	normPR distribution	ADMET	nr_er	nr_er	dmpnn	2	Ordinary folds	overall	604	0.517577
Figure 5	a	normPR distribution	ADMET	nr_er	nr_er	fcnn_fingerprint	2	Ordinary folds	overall	605	0.270564
Figure 5	a	normPR distribution	ADMET	nr_er	nr_er	fcnn_character	2	Ordinary folds	overall	606	0.426989
Figure 5	a	normPR distribution	ADMET	nr_er	nr_er	molclr	2	Ordinary folds	overall	607	0.22246
Figure 5	a	normPR distribution	ADMET	nr_er	nr_er	xgboost_fingerprint	2	Ordinary folds	overall	608	0.334927
Figure 5	a	normPR distribution	ADMET	nr_er	nr_er	xgboost_character	2	Ordinary folds	overall	609	0.435468
Figure 5	a	normPR distribution	ADMET	nr_er	nr_er	chemberta3	3	Ordinary folds	overall	610	0.502457
Figure 5	a	normPR distribution	ADMET	nr_er	nr_er	dmpnn	3	Ordinary folds	overall	611	0.36446
Figure 5	a	normPR distribution	ADMET	nr_er	nr_er	fcnn_fingerprint	3	Ordinary folds	overall	612	0.238055
Figure 5	a	normPR distribution	ADMET	nr_er	nr_er	fcnn_character	3	Ordinary folds	overall	613	0.355295
Figure 5	a	normPR distribution	ADMET	nr_er	nr_er	molclr	3	Ordinary folds	overall	614	0.446819
Figure 5	a	normPR distribution	ADMET	nr_er	nr_er	xgboost_fingerprint	3	Ordinary folds	overall	615	0.350173
Figure 5	a	normPR distribution	ADMET	nr_er	nr_er	xgboost_character	3	Ordinary folds	overall	616	0.431325
Figure 5	a	normPR distribution	ADMET	nr_er	nr_er	chemberta3	4	Ordinary folds	overall	617	0.484336
Figure 5	a	normPR distribution	ADMET	nr_er	nr_er	dmpnn	4	Ordinary folds	overall	618	0.485621
Figure 5	a	normPR distribution	ADMET	nr_er	nr_er	fcnn_fingerprint	4	Ordinary folds	overall	619	0.554557
Figure 5	a	normPR distribution	ADMET	nr_er	nr_er	fcnn_character	4	Ordinary folds	overall	620	0.532199
Figure 5	a	normPR distribution	ADMET	nr_er	nr_er	molclr	4	Ordinary folds	overall	621	0.510846
Figure 5	a	normPR distribution	ADMET	nr_er	nr_er	xgboost_fingerprint	4	Ordinary folds	overall	622	0.543242
Figure 5	a	normPR distribution	ADMET	nr_er	nr_er	xgboost_character	4	Ordinary folds	overall	623	0.535795
Figure 5	a	normPR distribution	ADMET	nr_er	nr_er	chemberta3	5	Ordinary folds	overall	624	0.36671
Figure 5	a	normPR distribution	ADMET	nr_er	nr_er	dmpnn	5	Ordinary folds	overall	625	0.375492
Figure 5	a	normPR distribution	ADMET	nr_er	nr_er	fcnn_fingerprint	5	Ordinary folds	overall	626	0.278956
Figure 5	a	normPR distribution	ADMET	nr_er	nr_er	fcnn_character	5	Ordinary folds	overall	627	0.477671
Figure 5	a	normPR distribution	ADMET	nr_er	nr_er	molclr	5	Ordinary folds	overall	628	0.349342
Figure 5	a	normPR distribution	ADMET	nr_er	nr_er	xgboost_fingerprint	5	Ordinary folds	overall	629	0.33039
Figure 5	a	normPR distribution	ADMET	nr_er	nr_er	xgboost_character	5	Ordinary folds	overall	630	0.447006
Figure 5	a	normPR distribution	ADMET	nr_er	nr_er	chemberta3	6	Ordinary folds	overall	631	0.40519
Figure 5	a	normPR distribution	ADMET	nr_er	nr_er	dmpnn	6	Ordinary folds	overall	632	0.392744
Figure 5	a	normPR distribution	ADMET	nr_er	nr_er	fcnn_fingerprint	6	Ordinary folds	overall	633	0.263444
Figure 5	a	normPR distribution	ADMET	nr_er	nr_er	fcnn_character	6	Ordinary folds	overall	634	0.356622
Figure 5	a	normPR distribution	ADMET	nr_er	nr_er	molclr	6	Ordinary folds	overall	635	0.328398
Figure 5	a	normPR distribution	ADMET	nr_er	nr_er	xgboost_fingerprint	6	Ordinary folds	overall	636	0.182221
Figure 5	a	normPR distribution	ADMET	nr_er	nr_er	xgboost_character	6	Ordinary folds	overall	637	0.300372
Figure 5	a	normPR distribution	ADMET	nr_er	nr_er	chemberta3	7	Ordinary folds	overall	638	0.215366
Figure 5	a	normPR distribution	ADMET	nr_er	nr_er	dmpnn	7	Ordinary folds	overall	639	0.180966
Figure 5	a	normPR distribution	ADMET	nr_er	nr_er	fcnn_fingerprint	7	Ordinary folds	overall	640	0.200945
Figure 5	a	normPR distribution	ADMET	nr_er	nr_er	fcnn_character	7	Ordinary folds	overall	641	0.213413
Figure 5	a	normPR distribution	ADMET	nr_er	nr_er	molclr	7	Ordinary folds	overall	642	0.0303857
Figure 5	a	normPR distribution	ADMET	nr_er	nr_er	xgboost_fingerprint	7	Ordinary folds	overall	643	0.207547
Figure 5	a	normPR distribution	ADMET	nr_er	nr_er	xgboost_character	7	Ordinary folds	overall	644	0.196283
Figure 5	a	normPR distribution	ADMET	nr_er	nr_er	chemberta3	8	Ordinary folds	overall	645	0.441041
Figure 5	a	normPR distribution	ADMET	nr_er	nr_er	dmpnn	8	Ordinary folds	overall	646	0.299091
Figure 5	a	normPR distribution	ADMET	nr_er	nr_er	fcnn_fingerprint	8	Ordinary folds	overall	647	0.48574
Figure 5	a	normPR distribution	ADMET	nr_er	nr_er	fcnn_character	8	Ordinary folds	overall	648	0.527628
Figure 5	a	normPR distribution	ADMET	nr_er	nr_er	molclr	8	Ordinary folds	overall	649	0.439017
Figure 5	a	normPR distribution	ADMET	nr_er	nr_er	xgboost_fingerprint	8	Ordinary folds	overall	650	0.420394
Figure 5	a	normPR distribution	ADMET	nr_er	nr_er	xgboost_character	8	Ordinary folds	overall	651	0.435314
Figure 5	a	normPR distribution	ADMET	nr_er	nr_er	chemberta3	9	Ordinary folds	overall	652	0.429663
Figure 5	a	normPR distribution	ADMET	nr_er	nr_er	dmpnn	9	Ordinary folds	overall	653	0.33769
Figure 5	a	normPR distribution	ADMET	nr_er	nr_er	fcnn_fingerprint	9	Ordinary folds	overall	654	0.254206
Figure 5	a	normPR distribution	ADMET	nr_er	nr_er	fcnn_character	9	Ordinary folds	overall	655	0.335784
Figure 5	a	normPR distribution	ADMET	nr_er	nr_er	molclr	9	Ordinary folds	overall	656	0.328223
Figure 5	a	normPR distribution	ADMET	nr_er	nr_er	xgboost_fingerprint	9	Ordinary folds	overall	657	0.374638
Figure 5	a	normPR distribution	ADMET	nr_er	nr_er	xgboost_character	9	Ordinary folds	overall	658	0.361571
Figure 5	a	normPR distribution	ADMET	nr_er	nr_er	chemberta3	10	Ordinary folds	overall	659	0.52407
Figure 5	a	normPR distribution	ADMET	nr_er	nr_er	dmpnn	10	Ordinary folds	overall	660	0.418313
Figure 5	a	normPR distribution	ADMET	nr_er	nr_er	fcnn_fingerprint	10	Ordinary folds	overall	661	0.39621
Figure 5	a	normPR distribution	ADMET	nr_er	nr_er	fcnn_character	10	Ordinary folds	overall	662	0.374807
Figure 5	a	normPR distribution	ADMET	nr_er	nr_er	molclr	10	Ordinary folds	overall	663	0.426346
Figure 5	a	normPR distribution	ADMET	nr_er	nr_er	xgboost_fingerprint	10	Ordinary folds	overall	664	0.433543
Figure 5	a	normPR distribution	ADMET	nr_er	nr_er	xgboost_character	10	Ordinary folds	overall	665	0.445342
Figure 5	a	normPR distribution	ADMET	nr_er_lbd	nr_er_lbd	chemberta3	2	Ordinary folds	overall	666	0.617538
Figure 5	a	normPR distribution	ADMET	nr_er_lbd	nr_er_lbd	dmpnn	2	Ordinary folds	overall	667	0.664193
Figure 5	a	normPR distribution	ADMET	nr_er_lbd	nr_er_lbd	fcnn_fingerprint	2	Ordinary folds	overall	668	0.611018
Figure 5	a	normPR distribution	ADMET	nr_er_lbd	nr_er_lbd	fcnn_character	2	Ordinary folds	overall	669	0.460026
Figure 5	a	normPR distribution	ADMET	nr_er_lbd	nr_er_lbd	molclr	2	Ordinary folds	overall	670	0.468675
Figure 5	a	normPR distribution	ADMET	nr_er_lbd	nr_er_lbd	xgboost_fingerprint	2	Ordinary folds	overall	671	0.572248
Figure 5	a	normPR distribution	ADMET	nr_er_lbd	nr_er_lbd	xgboost_character	2	Ordinary folds	overall	672	0.49137
Figure 5	a	normPR distribution	ADMET	nr_er_lbd	nr_er_lbd	chemberta3	3	Ordinary folds	overall	673	0.329835
Figure 5	a	normPR distribution	ADMET	nr_er_lbd	nr_er_lbd	dmpnn	3	Ordinary folds	overall	674	0.291198
Figure 5	a	normPR distribution	ADMET	nr_er_lbd	nr_er_lbd	fcnn_fingerprint	3	Ordinary folds	overall	675	0.316024
Figure 5	a	normPR distribution	ADMET	nr_er_lbd	nr_er_lbd	fcnn_character	3	Ordinary folds	overall	676	0.313281
Figure 5	a	normPR distribution	ADMET	nr_er_lbd	nr_er_lbd	molclr	3	Ordinary folds	overall	677	0.248044
Figure 5	a	normPR distribution	ADMET	nr_er_lbd	nr_er_lbd	xgboost_fingerprint	3	Ordinary folds	overall	678	0.331165
Figure 5	a	normPR distribution	ADMET	nr_er_lbd	nr_er_lbd	xgboost_character	3	Ordinary folds	overall	679	0.343698
Figure 5	a	normPR distribution	ADMET	nr_er_lbd	nr_er_lbd	chemberta3	4	Ordinary folds	overall	680	0.577423
Figure 5	a	normPR distribution	ADMET	nr_er_lbd	nr_er_lbd	dmpnn	4	Ordinary folds	overall	681	0.546935
Figure 5	a	normPR distribution	ADMET	nr_er_lbd	nr_er_lbd	fcnn_fingerprint	4	Ordinary folds	overall	682	0.466819
Figure 5	a	normPR distribution	ADMET	nr_er_lbd	nr_er_lbd	fcnn_character	4	Ordinary folds	overall	683	0.388233
Figure 5	a	normPR distribution	ADMET	nr_er_lbd	nr_er_lbd	molclr	4	Ordinary folds	overall	684	0.223278
Figure 5	a	normPR distribution	ADMET	nr_er_lbd	nr_er_lbd	xgboost_fingerprint	4	Ordinary folds	overall	685	0.560883
Figure 5	a	normPR distribution	ADMET	nr_er_lbd	nr_er_lbd	xgboost_character	4	Ordinary folds	overall	686	0.313912
Figure 5	a	normPR distribution	ADMET	nr_er_lbd	nr_er_lbd	chemberta3	5	Ordinary folds	overall	687	0.205552
Figure 5	a	normPR distribution	ADMET	nr_er_lbd	nr_er_lbd	dmpnn	5	Ordinary folds	overall	688	0.0916095
Figure 5	a	normPR distribution	ADMET	nr_er_lbd	nr_er_lbd	fcnn_fingerprint	5	Ordinary folds	overall	689	0.106257
Figure 5	a	normPR distribution	ADMET	nr_er_lbd	nr_er_lbd	fcnn_character	5	Ordinary folds	overall	690	0.162075
Figure 5	a	normPR distribution	ADMET	nr_er_lbd	nr_er_lbd	molclr	5	Ordinary folds	overall	691	0.0831847
Figure 5	a	normPR distribution	ADMET	nr_er_lbd	nr_er_lbd	xgboost_fingerprint	5	Ordinary folds	overall	692	0.0841537
Figure 5	a	normPR distribution	ADMET	nr_er_lbd	nr_er_lbd	xgboost_character	5	Ordinary folds	overall	693	0.146744
Figure 5	a	normPR distribution	ADMET	nr_er_lbd	nr_er_lbd	chemberta3	6	Ordinary folds	overall	694	0.602691
Figure 5	a	normPR distribution	ADMET	nr_er_lbd	nr_er_lbd	dmpnn	6	Ordinary folds	overall	695	0.708507
Figure 5	a	normPR distribution	ADMET	nr_er_lbd	nr_er_lbd	fcnn_fingerprint	6	Ordinary folds	overall	696	0.620531
Figure 5	a	normPR distribution	ADMET	nr_er_lbd	nr_er_lbd	fcnn_character	6	Ordinary folds	overall	697	0.580724
Figure 5	a	normPR distribution	ADMET	nr_er_lbd	nr_er_lbd	molclr	6	Ordinary folds	overall	698	0.601675
Figure 5	a	normPR distribution	ADMET	nr_er_lbd	nr_er_lbd	xgboost_fingerprint	6	Ordinary folds	overall	699	0.666986
Figure 5	a	normPR distribution	ADMET	nr_er_lbd	nr_er_lbd	xgboost_character	6	Ordinary folds	overall	700	0.574752
Figure 5	a	normPR distribution	ADMET	nr_er_lbd	nr_er_lbd	chemberta3	7	Ordinary folds	overall	701	0.292648
Figure 5	a	normPR distribution	ADMET	nr_er_lbd	nr_er_lbd	dmpnn	7	Ordinary folds	overall	702	0.135491
Figure 5	a	normPR distribution	ADMET	nr_er_lbd	nr_er_lbd	fcnn_fingerprint	7	Ordinary folds	overall	703	0.0726149
Figure 5	a	normPR distribution	ADMET	nr_er_lbd	nr_er_lbd	fcnn_character	7	Ordinary folds	overall	704	0.311924
Figure 5	a	normPR distribution	ADMET	nr_er_lbd	nr_er_lbd	molclr	7	Ordinary folds	overall	705	0.187097
Figure 5	a	normPR distribution	ADMET	nr_er_lbd	nr_er_lbd	xgboost_fingerprint	7	Ordinary folds	overall	706	0.151949
Figure 5	a	normPR distribution	ADMET	nr_er_lbd	nr_er_lbd	xgboost_character	7	Ordinary folds	overall	707	0.284889
Figure 5	a	normPR distribution	ADMET	nr_er_lbd	nr_er_lbd	chemberta3	8	Ordinary folds	overall	708	0.633107
Figure 5	a	normPR distribution	ADMET	nr_er_lbd	nr_er_lbd	dmpnn	8	Ordinary folds	overall	709	0.494614
Figure 5	a	normPR distribution	ADMET	nr_er_lbd	nr_er_lbd	fcnn_fingerprint	8	Ordinary folds	overall	710	0.393792
Figure 5	a	normPR distribution	ADMET	nr_er_lbd	nr_er_lbd	fcnn_character	8	Ordinary folds	overall	711	0.562346
Figure 5	a	normPR distribution	ADMET	nr_er_lbd	nr_er_lbd	molclr	8	Ordinary folds	overall	712	0.452455
Figure 5	a	normPR distribution	ADMET	nr_er_lbd	nr_er_lbd	xgboost_fingerprint	8	Ordinary folds	overall	713	0.405804
Figure 5	a	normPR distribution	ADMET	nr_er_lbd	nr_er_lbd	xgboost_character	8	Ordinary folds	overall	714	0.637619
Figure 5	a	normPR distribution	ADMET	nr_er_lbd	nr_er_lbd	chemberta3	9	Ordinary folds	overall	715	0.32718
Figure 5	a	normPR distribution	ADMET	nr_er_lbd	nr_er_lbd	dmpnn	9	Ordinary folds	overall	716	0.458414
Figure 5	a	normPR distribution	ADMET	nr_er_lbd	nr_er_lbd	fcnn_fingerprint	9	Ordinary folds	overall	717	0.286548
Figure 5	a	normPR distribution	ADMET	nr_er_lbd	nr_er_lbd	fcnn_character	9	Ordinary folds	overall	718	0.318453
Figure 5	a	normPR distribution	ADMET	nr_er_lbd	nr_er_lbd	molclr	9	Ordinary folds	overall	719	0.425556
Figure 5	a	normPR distribution	ADMET	nr_er_lbd	nr_er_lbd	xgboost_fingerprint	9	Ordinary folds	overall	720	0.35203
Figure 5	a	normPR distribution	ADMET	nr_er_lbd	nr_er_lbd	xgboost_character	9	Ordinary folds	overall	721	0.355751
Figure 5	a	normPR distribution	ADMET	nr_er_lbd	nr_er_lbd	chemberta3	10	Ordinary folds	overall	722	0.415482
Figure 5	a	normPR distribution	ADMET	nr_er_lbd	nr_er_lbd	dmpnn	10	Ordinary folds	overall	723	0.485154
Figure 5	a	normPR distribution	ADMET	nr_er_lbd	nr_er_lbd	fcnn_fingerprint	10	Ordinary folds	overall	724	0.393456
Figure 5	a	normPR distribution	ADMET	nr_er_lbd	nr_er_lbd	fcnn_character	10	Ordinary folds	overall	725	0.423012
Figure 5	a	normPR distribution	ADMET	nr_er_lbd	nr_er_lbd	molclr	10	Ordinary folds	overall	726	0.342191
Figure 5	a	normPR distribution	ADMET	nr_er_lbd	nr_er_lbd	xgboost_fingerprint	10	Ordinary folds	overall	727	0.610937
Figure 5	a	normPR distribution	ADMET	nr_er_lbd	nr_er_lbd	xgboost_character	10	Ordinary folds	overall	728	0.478975
Figure 5	a	normPR distribution	ADMET	nr_gr	nr_gr	chemberta3	2	Ordinary folds	overall	729	0.291705
Figure 5	a	normPR distribution	ADMET	nr_gr	nr_gr	dmpnn	2	Ordinary folds	overall	730	0.311583
Figure 5	a	normPR distribution	ADMET	nr_gr	nr_gr	fcnn_fingerprint	2	Ordinary folds	overall	731	0.273647
Figure 5	a	normPR distribution	ADMET	nr_gr	nr_gr	fcnn_character	2	Ordinary folds	overall	732	0.282502
Figure 5	a	normPR distribution	ADMET	nr_gr	nr_gr	molclr	2	Ordinary folds	overall	733	0.325901
Figure 5	a	normPR distribution	ADMET	nr_gr	nr_gr	xgboost_fingerprint	2	Ordinary folds	overall	734	0.330869
Figure 5	a	normPR distribution	ADMET	nr_gr	nr_gr	xgboost_character	2	Ordinary folds	overall	735	0.234829
Figure 5	a	normPR distribution	ADMET	nr_gr	nr_gr	chemberta3	3	Ordinary folds	overall	736	0.328702
Figure 5	a	normPR distribution	ADMET	nr_gr	nr_gr	dmpnn	3	Ordinary folds	overall	737	0.256836
Figure 5	a	normPR distribution	ADMET	nr_gr	nr_gr	fcnn_fingerprint	3	Ordinary folds	overall	738	0.405194
Figure 5	a	normPR distribution	ADMET	nr_gr	nr_gr	fcnn_character	3	Ordinary folds	overall	739	0.428227
Figure 5	a	normPR distribution	ADMET	nr_gr	nr_gr	molclr	3	Ordinary folds	overall	740	0.417192
Figure 5	a	normPR distribution	ADMET	nr_gr	nr_gr	xgboost_fingerprint	3	Ordinary folds	overall	741	0.423973
Figure 5	a	normPR distribution	ADMET	nr_gr	nr_gr	xgboost_character	3	Ordinary folds	overall	742	0.408033
Figure 5	a	normPR distribution	ADMET	nr_gr	nr_gr	chemberta3	4	Ordinary folds	overall	743	0.683213
Figure 5	a	normPR distribution	ADMET	nr_gr	nr_gr	dmpnn	4	Ordinary folds	overall	744	0.604461
Figure 5	a	normPR distribution	ADMET	nr_gr	nr_gr	fcnn_fingerprint	4	Ordinary folds	overall	745	0.556651
Figure 5	a	normPR distribution	ADMET	nr_gr	nr_gr	fcnn_character	4	Ordinary folds	overall	746	0.615841
Figure 5	a	normPR distribution	ADMET	nr_gr	nr_gr	molclr	4	Ordinary folds	overall	747	0.607624
Figure 5	a	normPR distribution	ADMET	nr_gr	nr_gr	xgboost_fingerprint	4	Ordinary folds	overall	748	0.632865
Figure 5	a	normPR distribution	ADMET	nr_gr	nr_gr	xgboost_character	4	Ordinary folds	overall	749	0.640164
Figure 5	a	normPR distribution	ADMET	nr_gr	nr_gr	chemberta3	5	Ordinary folds	overall	750	0.456463
Figure 5	a	normPR distribution	ADMET	nr_gr	nr_gr	dmpnn	5	Ordinary folds	overall	751	0.505304
Figure 5	a	normPR distribution	ADMET	nr_gr	nr_gr	fcnn_fingerprint	5	Ordinary folds	overall	752	0.351346
Figure 5	a	normPR distribution	ADMET	nr_gr	nr_gr	fcnn_character	5	Ordinary folds	overall	753	0.515467
Figure 5	a	normPR distribution	ADMET	nr_gr	nr_gr	molclr	5	Ordinary folds	overall	754	0.382117
Figure 5	a	normPR distribution	ADMET	nr_gr	nr_gr	xgboost_fingerprint	5	Ordinary folds	overall	755	0.538988
Figure 5	a	normPR distribution	ADMET	nr_gr	nr_gr	xgboost_character	5	Ordinary folds	overall	756	0.45911
Figure 5	a	normPR distribution	ADMET	nr_gr	nr_gr	chemberta3	6	Ordinary folds	overall	757	0.705535
Figure 5	a	normPR distribution	ADMET	nr_gr	nr_gr	dmpnn	6	Ordinary folds	overall	758	0.674679
Figure 5	a	normPR distribution	ADMET	nr_gr	nr_gr	fcnn_fingerprint	6	Ordinary folds	overall	759	0.621302
Figure 5	a	normPR distribution	ADMET	nr_gr	nr_gr	fcnn_character	6	Ordinary folds	overall	760	0.709703
Figure 5	a	normPR distribution	ADMET	nr_gr	nr_gr	molclr	6	Ordinary folds	overall	761	0.672815
Figure 5	a	normPR distribution	ADMET	nr_gr	nr_gr	xgboost_fingerprint	6	Ordinary folds	overall	762	0.66191
Figure 5	a	normPR distribution	ADMET	nr_gr	nr_gr	xgboost_character	6	Ordinary folds	overall	763	0.769518
Figure 5	a	normPR distribution	ADMET	nr_gr	nr_gr	chemberta3	7	Ordinary folds	overall	764	0.29097
Figure 5	a	normPR distribution	ADMET	nr_gr	nr_gr	dmpnn	7	Ordinary folds	overall	765	0.395721
Figure 5	a	normPR distribution	ADMET	nr_gr	nr_gr	fcnn_fingerprint	7	Ordinary folds	overall	766	0.293362
Figure 5	a	normPR distribution	ADMET	nr_gr	nr_gr	fcnn_character	7	Ordinary folds	overall	767	0.387669
Figure 5	a	normPR distribution	ADMET	nr_gr	nr_gr	molclr	7	Ordinary folds	overall	768	0.193153
Figure 5	a	normPR distribution	ADMET	nr_gr	nr_gr	xgboost_fingerprint	7	Ordinary folds	overall	769	0.36876
Figure 5	a	normPR distribution	ADMET	nr_gr	nr_gr	xgboost_character	7	Ordinary folds	overall	770	0.406738
Figure 5	a	normPR distribution	ADMET	nr_gr	nr_gr	chemberta3	8	Ordinary folds	overall	771	0.230741
Figure 5	a	normPR distribution	ADMET	nr_gr	nr_gr	dmpnn	8	Ordinary folds	overall	772	0.178572
Figure 5	a	normPR distribution	ADMET	nr_gr	nr_gr	fcnn_fingerprint	8	Ordinary folds	overall	773	0.18707
Figure 5	a	normPR distribution	ADMET	nr_gr	nr_gr	fcnn_character	8	Ordinary folds	overall	774	0.314067
Figure 5	a	normPR distribution	ADMET	nr_gr	nr_gr	molclr	8	Ordinary folds	overall	775	0.103115
Figure 5	a	normPR distribution	ADMET	nr_gr	nr_gr	xgboost_fingerprint	8	Ordinary folds	overall	776	0.134598
Figure 5	a	normPR distribution	ADMET	nr_gr	nr_gr	xgboost_character	8	Ordinary folds	overall	777	0.228379
Figure 5	a	normPR distribution	ADMET	nr_gr	nr_gr	chemberta3	9	Ordinary folds	overall	778	0.323927
Figure 5	a	normPR distribution	ADMET	nr_gr	nr_gr	dmpnn	9	Ordinary folds	overall	779	0.570816
Figure 5	a	normPR distribution	ADMET	nr_gr	nr_gr	fcnn_fingerprint	9	Ordinary folds	overall	780	0.508998
Figure 5	a	normPR distribution	ADMET	nr_gr	nr_gr	fcnn_character	9	Ordinary folds	overall	781	0.523306
Figure 5	a	normPR distribution	ADMET	nr_gr	nr_gr	molclr	9	Ordinary folds	overall	782	0.394191
Figure 5	a	normPR distribution	ADMET	nr_gr	nr_gr	xgboost_fingerprint	9	Ordinary folds	overall	783	0.473757
Figure 5	a	normPR distribution	ADMET	nr_gr	nr_gr	xgboost_character	9	Ordinary folds	overall	784	0.468197
Figure 5	a	normPR distribution	ADMET	nr_gr	nr_gr	chemberta3	10	Ordinary folds	overall	785	0.670185
Figure 5	a	normPR distribution	ADMET	nr_gr	nr_gr	dmpnn	10	Ordinary folds	overall	786	0.682416
Figure 5	a	normPR distribution	ADMET	nr_gr	nr_gr	fcnn_fingerprint	10	Ordinary folds	overall	787	0.601715
Figure 5	a	normPR distribution	ADMET	nr_gr	nr_gr	fcnn_character	10	Ordinary folds	overall	788	0.69155
Figure 5	a	normPR distribution	ADMET	nr_gr	nr_gr	molclr	10	Ordinary folds	overall	789	0.650483
Figure 5	a	normPR distribution	ADMET	nr_gr	nr_gr	xgboost_fingerprint	10	Ordinary folds	overall	790	0.615827
Figure 5	a	normPR distribution	ADMET	nr_gr	nr_gr	xgboost_character	10	Ordinary folds	overall	791	0.658259
Figure 5	a	normPR distribution	ADMET	nr_ppar_gamma	nr_ppar_gamma	chemberta3	2	Ordinary folds	overall	792	0.0491905
Figure 5	a	normPR distribution	ADMET	nr_ppar_gamma	nr_ppar_gamma	dmpnn	2	Ordinary folds	overall	793	0.107416
Figure 5	a	normPR distribution	ADMET	nr_ppar_gamma	nr_ppar_gamma	fcnn_fingerprint	2	Ordinary folds	overall	794	0.114007
Figure 5	a	normPR distribution	ADMET	nr_ppar_gamma	nr_ppar_gamma	fcnn_character	2	Ordinary folds	overall	795	0.140102
Figure 5	a	normPR distribution	ADMET	nr_ppar_gamma	nr_ppar_gamma	molclr	2	Ordinary folds	overall	796	0.151436
Figure 5	a	normPR distribution	ADMET	nr_ppar_gamma	nr_ppar_gamma	xgboost_fingerprint	2	Ordinary folds	overall	797	0.0813626
Figure 5	a	normPR distribution	ADMET	nr_ppar_gamma	nr_ppar_gamma	xgboost_character	2	Ordinary folds	overall	798	0.223802
Figure 5	a	normPR distribution	ADMET	nr_ppar_gamma	nr_ppar_gamma	chemberta3	3	Ordinary folds	overall	799	0.212378
Figure 5	a	normPR distribution	ADMET	nr_ppar_gamma	nr_ppar_gamma	dmpnn	3	Ordinary folds	overall	800	0.455819
Figure 5	a	normPR distribution	ADMET	nr_ppar_gamma	nr_ppar_gamma	fcnn_fingerprint	3	Ordinary folds	overall	801	0.239876
Figure 5	a	normPR distribution	ADMET	nr_ppar_gamma	nr_ppar_gamma	fcnn_character	3	Ordinary folds	overall	802	0.228512
Figure 5	a	normPR distribution	ADMET	nr_ppar_gamma	nr_ppar_gamma	molclr	3	Ordinary folds	overall	803	0.120393
Figure 5	a	normPR distribution	ADMET	nr_ppar_gamma	nr_ppar_gamma	xgboost_fingerprint	3	Ordinary folds	overall	804	0.204189
Figure 5	a	normPR distribution	ADMET	nr_ppar_gamma	nr_ppar_gamma	xgboost_character	3	Ordinary folds	overall	805	0.203203
Figure 5	a	normPR distribution	ADMET	nr_ppar_gamma	nr_ppar_gamma	chemberta3	4	Ordinary folds	overall	806	0.151423
Figure 5	a	normPR distribution	ADMET	nr_ppar_gamma	nr_ppar_gamma	dmpnn	4	Ordinary folds	overall	807	0.196373
Figure 5	a	normPR distribution	ADMET	nr_ppar_gamma	nr_ppar_gamma	fcnn_fingerprint	4	Ordinary folds	overall	808	0.0165249
Figure 5	a	normPR distribution	ADMET	nr_ppar_gamma	nr_ppar_gamma	fcnn_character	4	Ordinary folds	overall	809	0.344745
Figure 5	a	normPR distribution	ADMET	nr_ppar_gamma	nr_ppar_gamma	molclr	4	Ordinary folds	overall	810	0.0489983
Figure 5	a	normPR distribution	ADMET	nr_ppar_gamma	nr_ppar_gamma	xgboost_fingerprint	4	Ordinary folds	overall	811	0.0812718
Figure 5	a	normPR distribution	ADMET	nr_ppar_gamma	nr_ppar_gamma	xgboost_character	4	Ordinary folds	overall	812	0.117633
Figure 5	a	normPR distribution	ADMET	nr_ppar_gamma	nr_ppar_gamma	chemberta3	5	Ordinary folds	overall	813	0.18579
Figure 5	a	normPR distribution	ADMET	nr_ppar_gamma	nr_ppar_gamma	dmpnn	5	Ordinary folds	overall	814	0.295098
Figure 5	a	normPR distribution	ADMET	nr_ppar_gamma	nr_ppar_gamma	fcnn_fingerprint	5	Ordinary folds	overall	815	0.118258
Figure 5	a	normPR distribution	ADMET	nr_ppar_gamma	nr_ppar_gamma	fcnn_character	5	Ordinary folds	overall	816	0.436627
Figure 5	a	normPR distribution	ADMET	nr_ppar_gamma	nr_ppar_gamma	molclr	5	Ordinary folds	overall	817	0.22301
Figure 5	a	normPR distribution	ADMET	nr_ppar_gamma	nr_ppar_gamma	xgboost_fingerprint	5	Ordinary folds	overall	818	0.165042
Figure 5	a	normPR distribution	ADMET	nr_ppar_gamma	nr_ppar_gamma	xgboost_character	5	Ordinary folds	overall	819	0.211435
Figure 5	a	normPR distribution	ADMET	nr_ppar_gamma	nr_ppar_gamma	chemberta3	6	Ordinary folds	overall	820	0.106841
Figure 5	a	normPR distribution	ADMET	nr_ppar_gamma	nr_ppar_gamma	dmpnn	6	Ordinary folds	overall	821	0.0556664
Figure 5	a	normPR distribution	ADMET	nr_ppar_gamma	nr_ppar_gamma	fcnn_fingerprint	6	Ordinary folds	overall	822	0.202559
Figure 5	a	normPR distribution	ADMET	nr_ppar_gamma	nr_ppar_gamma	fcnn_character	6	Ordinary folds	overall	823	0.0839695
Figure 5	a	normPR distribution	ADMET	nr_ppar_gamma	nr_ppar_gamma	molclr	6	Ordinary folds	overall	824	0.0511389
Figure 5	a	normPR distribution	ADMET	nr_ppar_gamma	nr_ppar_gamma	xgboost_fingerprint	6	Ordinary folds	overall	825	0.442291
Figure 5	a	normPR distribution	ADMET	nr_ppar_gamma	nr_ppar_gamma	xgboost_character	6	Ordinary folds	overall	826	0.328873
Figure 5	a	normPR distribution	ADMET	nr_ppar_gamma	nr_ppar_gamma	chemberta3	7	Ordinary folds	overall	827	0.247258
Figure 5	a	normPR distribution	ADMET	nr_ppar_gamma	nr_ppar_gamma	dmpnn	7	Ordinary folds	overall	828	0.250836
Figure 5	a	normPR distribution	ADMET	nr_ppar_gamma	nr_ppar_gamma	fcnn_fingerprint	7	Ordinary folds	overall	829	0.108861
Figure 5	a	normPR distribution	ADMET	nr_ppar_gamma	nr_ppar_gamma	fcnn_character	7	Ordinary folds	overall	830	0.130686
Figure 5	a	normPR distribution	ADMET	nr_ppar_gamma	nr_ppar_gamma	molclr	7	Ordinary folds	overall	831	0.142744
Figure 5	a	normPR distribution	ADMET	nr_ppar_gamma	nr_ppar_gamma	xgboost_fingerprint	7	Ordinary folds	overall	832	0.131363
Figure 5	a	normPR distribution	ADMET	nr_ppar_gamma	nr_ppar_gamma	xgboost_character	7	Ordinary folds	overall	833	0.113148
Figure 5	a	normPR distribution	ADMET	nr_ppar_gamma	nr_ppar_gamma	chemberta3	8	Ordinary folds	overall	834	0.0418385
Figure 5	a	normPR distribution	ADMET	nr_ppar_gamma	nr_ppar_gamma	dmpnn	8	Ordinary folds	overall	835	0.0759096
Figure 5	a	normPR distribution	ADMET	nr_ppar_gamma	nr_ppar_gamma	fcnn_fingerprint	8	Ordinary folds	overall	836	0.00579499
Figure 5	a	normPR distribution	ADMET	nr_ppar_gamma	nr_ppar_gamma	fcnn_character	8	Ordinary folds	overall	837	0.136608
Figure 5	a	normPR distribution	ADMET	nr_ppar_gamma	nr_ppar_gamma	molclr	8	Ordinary folds	overall	838	0.0279164
Figure 5	a	normPR distribution	ADMET	nr_ppar_gamma	nr_ppar_gamma	xgboost_fingerprint	8	Ordinary folds	overall	839	0.108587
Figure 5	a	normPR distribution	ADMET	nr_ppar_gamma	nr_ppar_gamma	xgboost_character	8	Ordinary folds	overall	840	0.111774
Figure 5	a	normPR distribution	ADMET	nr_ppar_gamma	nr_ppar_gamma	chemberta3	9	Ordinary folds	overall	841	0.097098
Figure 5	a	normPR distribution	ADMET	nr_ppar_gamma	nr_ppar_gamma	dmpnn	9	Ordinary folds	overall	842	0.326881
Figure 5	a	normPR distribution	ADMET	nr_ppar_gamma	nr_ppar_gamma	fcnn_fingerprint	9	Ordinary folds	overall	843	0.150508
Figure 5	a	normPR distribution	ADMET	nr_ppar_gamma	nr_ppar_gamma	fcnn_character	9	Ordinary folds	overall	844	0.178214
Figure 5	a	normPR distribution	ADMET	nr_ppar_gamma	nr_ppar_gamma	molclr	9	Ordinary folds	overall	845	0.226867
Figure 5	a	normPR distribution	ADMET	nr_ppar_gamma	nr_ppar_gamma	xgboost_fingerprint	9	Ordinary folds	overall	846	0.267129
Figure 5	a	normPR distribution	ADMET	nr_ppar_gamma	nr_ppar_gamma	xgboost_character	9	Ordinary folds	overall	847	0.276352
Figure 5	a	normPR distribution	ADMET	nr_ppar_gamma	nr_ppar_gamma	chemberta3	10	Ordinary folds	overall	848	0.0375194
Figure 5	a	normPR distribution	ADMET	nr_ppar_gamma	nr_ppar_gamma	dmpnn	10	Ordinary folds	overall	849	0.0688405
Figure 5	a	normPR distribution	ADMET	nr_ppar_gamma	nr_ppar_gamma	fcnn_fingerprint	10	Ordinary folds	overall	850	0.0113869
Figure 5	a	normPR distribution	ADMET	nr_ppar_gamma	nr_ppar_gamma	fcnn_character	10	Ordinary folds	overall	851	0.133033
Figure 5	a	normPR distribution	ADMET	nr_ppar_gamma	nr_ppar_gamma	molclr	10	Ordinary folds	overall	852	0.0658841
Figure 5	a	normPR distribution	ADMET	nr_ppar_gamma	nr_ppar_gamma	xgboost_fingerprint	10	Ordinary folds	overall	853	0.0681046
Figure 5	a	normPR distribution	ADMET	nr_ppar_gamma	nr_ppar_gamma	xgboost_character	10	Ordinary folds	overall	854	0.348053
Figure 5	a	normPR distribution	ADMET	nr_tr	nr_tr	chemberta3	2	Ordinary folds	overall	855	0.156252
Figure 5	a	normPR distribution	ADMET	nr_tr	nr_tr	dmpnn	2	Ordinary folds	overall	856	0.100049
Figure 5	a	normPR distribution	ADMET	nr_tr	nr_tr	fcnn_fingerprint	2	Ordinary folds	overall	857	0.107568
Figure 5	a	normPR distribution	ADMET	nr_tr	nr_tr	fcnn_character	2	Ordinary folds	overall	858	0.256367
Figure 5	a	normPR distribution	ADMET	nr_tr	nr_tr	molclr	2	Ordinary folds	overall	859	0.152357
Figure 5	a	normPR distribution	ADMET	nr_tr	nr_tr	xgboost_fingerprint	2	Ordinary folds	overall	860	0.200572
Figure 5	a	normPR distribution	ADMET	nr_tr	nr_tr	xgboost_character	2	Ordinary folds	overall	861	0.191412
Figure 5	a	normPR distribution	ADMET	nr_tr	nr_tr	chemberta3	3	Ordinary folds	overall	862	0.150077
Figure 5	a	normPR distribution	ADMET	nr_tr	nr_tr	dmpnn	3	Ordinary folds	overall	863	0.231393
Figure 5	a	normPR distribution	ADMET	nr_tr	nr_tr	fcnn_fingerprint	3	Ordinary folds	overall	864	0.0821629
Figure 5	a	normPR distribution	ADMET	nr_tr	nr_tr	fcnn_character	3	Ordinary folds	overall	865	0.217429
Figure 5	a	normPR distribution	ADMET	nr_tr	nr_tr	molclr	3	Ordinary folds	overall	866	0.19132
Figure 5	a	normPR distribution	ADMET	nr_tr	nr_tr	xgboost_fingerprint	3	Ordinary folds	overall	867	0.140406
Figure 5	a	normPR distribution	ADMET	nr_tr	nr_tr	xgboost_character	3	Ordinary folds	overall	868	0.257713
Figure 5	a	normPR distribution	ADMET	nr_tr	nr_tr	chemberta3	4	Ordinary folds	overall	869	0.428803
Figure 5	a	normPR distribution	ADMET	nr_tr	nr_tr	dmpnn	4	Ordinary folds	overall	870	0.417296
Figure 5	a	normPR distribution	ADMET	nr_tr	nr_tr	fcnn_fingerprint	4	Ordinary folds	overall	871	0.169345
Figure 5	a	normPR distribution	ADMET	nr_tr	nr_tr	fcnn_character	4	Ordinary folds	overall	872	0.324429
Figure 5	a	normPR distribution	ADMET	nr_tr	nr_tr	molclr	4	Ordinary folds	overall	873	0.358182
Figure 5	a	normPR distribution	ADMET	nr_tr	nr_tr	xgboost_fingerprint	4	Ordinary folds	overall	874	0.265793
Figure 5	a	normPR distribution	ADMET	nr_tr	nr_tr	xgboost_character	4	Ordinary folds	overall	875	0.243932
Figure 5	a	normPR distribution	ADMET	nr_tr	nr_tr	chemberta3	5	Ordinary folds	overall	876	0.336326
Figure 5	a	normPR distribution	ADMET	nr_tr	nr_tr	dmpnn	5	Ordinary folds	overall	877	0.229652
Figure 5	a	normPR distribution	ADMET	nr_tr	nr_tr	fcnn_fingerprint	5	Ordinary folds	overall	878	0.120843
Figure 5	a	normPR distribution	ADMET	nr_tr	nr_tr	fcnn_character	5	Ordinary folds	overall	879	0.419246
Figure 5	a	normPR distribution	ADMET	nr_tr	nr_tr	molclr	5	Ordinary folds	overall	880	0.0929015
Figure 5	a	normPR distribution	ADMET	nr_tr	nr_tr	xgboost_fingerprint	5	Ordinary folds	overall	881	0.209637
Figure 5	a	normPR distribution	ADMET	nr_tr	nr_tr	xgboost_character	5	Ordinary folds	overall	882	0.436722
Figure 5	a	normPR distribution	ADMET	nr_tr	nr_tr	chemberta3	6	Ordinary folds	overall	883	0.151866
Figure 5	a	normPR distribution	ADMET	nr_tr	nr_tr	dmpnn	6	Ordinary folds	overall	884	0.163093
Figure 5	a	normPR distribution	ADMET	nr_tr	nr_tr	fcnn_fingerprint	6	Ordinary folds	overall	885	0.222433
Figure 5	a	normPR distribution	ADMET	nr_tr	nr_tr	fcnn_character	6	Ordinary folds	overall	886	0.298332
Figure 5	a	normPR distribution	ADMET	nr_tr	nr_tr	molclr	6	Ordinary folds	overall	887	0.129358
Figure 5	a	normPR distribution	ADMET	nr_tr	nr_tr	xgboost_fingerprint	6	Ordinary folds	overall	888	0.0604402
Figure 5	a	normPR distribution	ADMET	nr_tr	nr_tr	xgboost_character	6	Ordinary folds	overall	889	0.361788
Figure 5	a	normPR distribution	ADMET	nr_tr	nr_tr	chemberta3	7	Ordinary folds	overall	890	0.180968
Figure 5	a	normPR distribution	ADMET	nr_tr	nr_tr	dmpnn	7	Ordinary folds	overall	891	0.373436
Figure 5	a	normPR distribution	ADMET	nr_tr	nr_tr	fcnn_fingerprint	7	Ordinary folds	overall	892	0.193468
Figure 5	a	normPR distribution	ADMET	nr_tr	nr_tr	fcnn_character	7	Ordinary folds	overall	893	0.175996
Figure 5	a	normPR distribution	ADMET	nr_tr	nr_tr	molclr	7	Ordinary folds	overall	894	0.111737
Figure 5	a	normPR distribution	ADMET	nr_tr	nr_tr	xgboost_fingerprint	7	Ordinary folds	overall	895	0.211659
Figure 5	a	normPR distribution	ADMET	nr_tr	nr_tr	xgboost_character	7	Ordinary folds	overall	896	0.19556
Figure 5	a	normPR distribution	ADMET	nr_tr	nr_tr	chemberta3	8	Ordinary folds	overall	897	0.264378
Figure 5	a	normPR distribution	ADMET	nr_tr	nr_tr	dmpnn	8	Ordinary folds	overall	898	0.284685
Figure 5	a	normPR distribution	ADMET	nr_tr	nr_tr	fcnn_fingerprint	8	Ordinary folds	overall	899	0.341286
Figure 5	a	normPR distribution	ADMET	nr_tr	nr_tr	fcnn_character	8	Ordinary folds	overall	900	0.241155
Figure 5	a	normPR distribution	ADMET	nr_tr	nr_tr	molclr	8	Ordinary folds	overall	901	0.0757774
Figure 5	a	normPR distribution	ADMET	nr_tr	nr_tr	xgboost_fingerprint	8	Ordinary folds	overall	902	0.0575819
Figure 5	a	normPR distribution	ADMET	nr_tr	nr_tr	xgboost_character	8	Ordinary folds	overall	903	0.232646
Figure 5	a	normPR distribution	ADMET	nr_tr	nr_tr	chemberta3	9	Ordinary folds	overall	904	0.137842
Figure 5	a	normPR distribution	ADMET	nr_tr	nr_tr	dmpnn	9	Ordinary folds	overall	905	0.0955472
Figure 5	a	normPR distribution	ADMET	nr_tr	nr_tr	fcnn_fingerprint	9	Ordinary folds	overall	906	0.0285393
Figure 5	a	normPR distribution	ADMET	nr_tr	nr_tr	fcnn_character	9	Ordinary folds	overall	907	0.188234
Figure 5	a	normPR distribution	ADMET	nr_tr	nr_tr	molclr	9	Ordinary folds	overall	908	0.0393956
Figure 5	a	normPR distribution	ADMET	nr_tr	nr_tr	xgboost_fingerprint	9	Ordinary folds	overall	909	0.0460637
Figure 5	a	normPR distribution	ADMET	nr_tr	nr_tr	xgboost_character	9	Ordinary folds	overall	910	0.159518
Figure 5	a	normPR distribution	ADMET	nr_tr	nr_tr	chemberta3	10	Ordinary folds	overall	911	0.171279
Figure 5	a	normPR distribution	ADMET	nr_tr	nr_tr	dmpnn	10	Ordinary folds	overall	912	0.280558
Figure 5	a	normPR distribution	ADMET	nr_tr	nr_tr	fcnn_fingerprint	10	Ordinary folds	overall	913	0.08974
Figure 5	a	normPR distribution	ADMET	nr_tr	nr_tr	fcnn_character	10	Ordinary folds	overall	914	0.175282
Figure 5	a	normPR distribution	ADMET	nr_tr	nr_tr	molclr	10	Ordinary folds	overall	915	0.11946
Figure 5	a	normPR distribution	ADMET	nr_tr	nr_tr	xgboost_fingerprint	10	Ordinary folds	overall	916	0.213539
Figure 5	a	normPR distribution	ADMET	nr_tr	nr_tr	xgboost_character	10	Ordinary folds	overall	917	0.315877
Figure 5	a	normPR distribution	ADMET	respiratory_tox	respiratory_tox	chemberta3	2	Ordinary folds	overall	918	0.646326
Figure 5	a	normPR distribution	ADMET	respiratory_tox	respiratory_tox	dmpnn	2	Ordinary folds	overall	919	0.606538
Figure 5	a	normPR distribution	ADMET	respiratory_tox	respiratory_tox	fcnn_fingerprint	2	Ordinary folds	overall	920	0.618055
Figure 5	a	normPR distribution	ADMET	respiratory_tox	respiratory_tox	fcnn_character	2	Ordinary folds	overall	921	0.3986
Figure 5	a	normPR distribution	ADMET	respiratory_tox	respiratory_tox	molclr	2	Ordinary folds	overall	922	0.473145
Figure 5	a	normPR distribution	ADMET	respiratory_tox	respiratory_tox	xgboost_fingerprint	2	Ordinary folds	overall	923	0.639408
Figure 5	a	normPR distribution	ADMET	respiratory_tox	respiratory_tox	xgboost_character	2	Ordinary folds	overall	924	0.514169
Figure 5	a	normPR distribution	ADMET	respiratory_tox	respiratory_tox	chemberta3	3	Ordinary folds	overall	925	0.799546
Figure 5	a	normPR distribution	ADMET	respiratory_tox	respiratory_tox	dmpnn	3	Ordinary folds	overall	926	0.734331
Figure 5	a	normPR distribution	ADMET	respiratory_tox	respiratory_tox	fcnn_fingerprint	3	Ordinary folds	overall	927	0.766369
Figure 5	a	normPR distribution	ADMET	respiratory_tox	respiratory_tox	fcnn_character	3	Ordinary folds	overall	928	0.683802
Figure 5	a	normPR distribution	ADMET	respiratory_tox	respiratory_tox	molclr	3	Ordinary folds	overall	929	0.747766
Figure 5	a	normPR distribution	ADMET	respiratory_tox	respiratory_tox	xgboost_fingerprint	3	Ordinary folds	overall	930	0.776067
Figure 5	a	normPR distribution	ADMET	respiratory_tox	respiratory_tox	xgboost_character	3	Ordinary folds	overall	931	0.710792
Figure 5	a	normPR distribution	ADMET	respiratory_tox	respiratory_tox	chemberta3	4	Ordinary folds	overall	932	0.648104
Figure 5	a	normPR distribution	ADMET	respiratory_tox	respiratory_tox	dmpnn	4	Ordinary folds	overall	933	0.577095
Figure 5	a	normPR distribution	ADMET	respiratory_tox	respiratory_tox	fcnn_fingerprint	4	Ordinary folds	overall	934	0.691773
Figure 5	a	normPR distribution	ADMET	respiratory_tox	respiratory_tox	fcnn_character	4	Ordinary folds	overall	935	0.641521
Figure 5	a	normPR distribution	ADMET	respiratory_tox	respiratory_tox	molclr	4	Ordinary folds	overall	936	0.662719
Figure 5	a	normPR distribution	ADMET	respiratory_tox	respiratory_tox	xgboost_fingerprint	4	Ordinary folds	overall	937	0.616488
Figure 5	a	normPR distribution	ADMET	respiratory_tox	respiratory_tox	xgboost_character	4	Ordinary folds	overall	938	0.664603
Figure 5	a	normPR distribution	ADMET	respiratory_tox	respiratory_tox	chemberta3	5	Ordinary folds	overall	939	0.786538
Figure 5	a	normPR distribution	ADMET	respiratory_tox	respiratory_tox	dmpnn	5	Ordinary folds	overall	940	0.761867
Figure 5	a	normPR distribution	ADMET	respiratory_tox	respiratory_tox	fcnn_fingerprint	5	Ordinary folds	overall	941	0.65444
Figure 5	a	normPR distribution	ADMET	respiratory_tox	respiratory_tox	fcnn_character	5	Ordinary folds	overall	942	0.651329
Figure 5	a	normPR distribution	ADMET	respiratory_tox	respiratory_tox	molclr	5	Ordinary folds	overall	943	0.715008
Figure 5	a	normPR distribution	ADMET	respiratory_tox	respiratory_tox	xgboost_fingerprint	5	Ordinary folds	overall	944	0.703083
Figure 5	a	normPR distribution	ADMET	respiratory_tox	respiratory_tox	xgboost_character	5	Ordinary folds	overall	945	0.631498
Figure 5	a	normPR distribution	ADMET	respiratory_tox	respiratory_tox	chemberta3	6	Ordinary folds	overall	946	0.488131
Figure 5	a	normPR distribution	ADMET	respiratory_tox	respiratory_tox	dmpnn	6	Ordinary folds	overall	947	0.659491
Figure 5	a	normPR distribution	ADMET	respiratory_tox	respiratory_tox	fcnn_fingerprint	6	Ordinary folds	overall	948	0.587916
Figure 5	a	normPR distribution	ADMET	respiratory_tox	respiratory_tox	fcnn_character	6	Ordinary folds	overall	949	0.588207
Figure 5	a	normPR distribution	ADMET	respiratory_tox	respiratory_tox	molclr	6	Ordinary folds	overall	950	0.583083
Figure 5	a	normPR distribution	ADMET	respiratory_tox	respiratory_tox	xgboost_fingerprint	6	Ordinary folds	overall	951	0.62252
Figure 5	a	normPR distribution	ADMET	respiratory_tox	respiratory_tox	xgboost_character	6	Ordinary folds	overall	952	0.582548
Figure 5	a	normPR distribution	ADMET	respiratory_tox	respiratory_tox	chemberta3	7	Ordinary folds	overall	953	0.596193
Figure 5	a	normPR distribution	ADMET	respiratory_tox	respiratory_tox	dmpnn	7	Ordinary folds	overall	954	0.619723
Figure 5	a	normPR distribution	ADMET	respiratory_tox	respiratory_tox	fcnn_fingerprint	7	Ordinary folds	overall	955	0.485501
Figure 5	a	normPR distribution	ADMET	respiratory_tox	respiratory_tox	fcnn_character	7	Ordinary folds	overall	956	0.537271
Figure 5	a	normPR distribution	ADMET	respiratory_tox	respiratory_tox	molclr	7	Ordinary folds	overall	957	0.514429
Figure 5	a	normPR distribution	ADMET	respiratory_tox	respiratory_tox	xgboost_fingerprint	7	Ordinary folds	overall	958	0.487863
Figure 5	a	normPR distribution	ADMET	respiratory_tox	respiratory_tox	xgboost_character	7	Ordinary folds	overall	959	0.65965
Figure 5	a	normPR distribution	ADMET	respiratory_tox	respiratory_tox	chemberta3	8	Ordinary folds	overall	960	0.661936
Figure 5	a	normPR distribution	ADMET	respiratory_tox	respiratory_tox	dmpnn	8	Ordinary folds	overall	961	0.653166
Figure 5	a	normPR distribution	ADMET	respiratory_tox	respiratory_tox	fcnn_fingerprint	8	Ordinary folds	overall	962	0.646581
Figure 5	a	normPR distribution	ADMET	respiratory_tox	respiratory_tox	fcnn_character	8	Ordinary folds	overall	963	0.618048
Figure 5	a	normPR distribution	ADMET	respiratory_tox	respiratory_tox	molclr	8	Ordinary folds	overall	964	0.703334
Figure 5	a	normPR distribution	ADMET	respiratory_tox	respiratory_tox	xgboost_fingerprint	8	Ordinary folds	overall	965	0.681286
Figure 5	a	normPR distribution	ADMET	respiratory_tox	respiratory_tox	xgboost_character	8	Ordinary folds	overall	966	0.678534
Figure 5	a	normPR distribution	ADMET	respiratory_tox	respiratory_tox	chemberta3	9	Ordinary folds	overall	967	0.412234
Figure 5	a	normPR distribution	ADMET	respiratory_tox	respiratory_tox	dmpnn	9	Ordinary folds	overall	968	0.512851
Figure 5	a	normPR distribution	ADMET	respiratory_tox	respiratory_tox	fcnn_fingerprint	9	Ordinary folds	overall	969	0.579717
Figure 5	a	normPR distribution	ADMET	respiratory_tox	respiratory_tox	fcnn_character	9	Ordinary folds	overall	970	0.505002
Figure 5	a	normPR distribution	ADMET	respiratory_tox	respiratory_tox	molclr	9	Ordinary folds	overall	971	0.524203
Figure 5	a	normPR distribution	ADMET	respiratory_tox	respiratory_tox	xgboost_fingerprint	9	Ordinary folds	overall	972	0.569241
Figure 5	a	normPR distribution	ADMET	respiratory_tox	respiratory_tox	xgboost_character	9	Ordinary folds	overall	973	0.393266
Figure 5	a	normPR distribution	ADMET	respiratory_tox	respiratory_tox	chemberta3	10	Ordinary folds	overall	974	0.610922
Figure 5	a	normPR distribution	ADMET	respiratory_tox	respiratory_tox	dmpnn	10	Ordinary folds	overall	975	0.573613
Figure 5	a	normPR distribution	ADMET	respiratory_tox	respiratory_tox	fcnn_fingerprint	10	Ordinary folds	overall	976	0.58659
Figure 5	a	normPR distribution	ADMET	respiratory_tox	respiratory_tox	fcnn_character	10	Ordinary folds	overall	977	0.533398
Figure 5	a	normPR distribution	ADMET	respiratory_tox	respiratory_tox	molclr	10	Ordinary folds	overall	978	0.613274
Figure 5	a	normPR distribution	ADMET	respiratory_tox	respiratory_tox	xgboost_fingerprint	10	Ordinary folds	overall	979	0.611233
Figure 5	a	normPR distribution	ADMET	respiratory_tox	respiratory_tox	xgboost_character	10	Ordinary folds	overall	980	0.40006
Figure 5	a	normPR distribution	ADMET	skin_sens	skin_sens	chemberta3	2	Ordinary folds	overall	981	0.290822
Figure 5	a	normPR distribution	ADMET	skin_sens	skin_sens	dmpnn	2	Ordinary folds	overall	982	0.258606
Figure 5	a	normPR distribution	ADMET	skin_sens	skin_sens	fcnn_fingerprint	2	Ordinary folds	overall	983	0.102765
Figure 5	a	normPR distribution	ADMET	skin_sens	skin_sens	fcnn_character	2	Ordinary folds	overall	984	0.139244
Figure 5	a	normPR distribution	ADMET	skin_sens	skin_sens	molclr	2	Ordinary folds	overall	985	-0.0439501
Figure 5	a	normPR distribution	ADMET	skin_sens	skin_sens	xgboost_fingerprint	2	Ordinary folds	overall	986	0.115854
Figure 5	a	normPR distribution	ADMET	skin_sens	skin_sens	xgboost_character	2	Ordinary folds	overall	987	0.357071
Figure 5	a	normPR distribution	ADMET	skin_sens	skin_sens	chemberta3	3	Ordinary folds	overall	988	0.297316
Figure 5	a	normPR distribution	ADMET	skin_sens	skin_sens	dmpnn	3	Ordinary folds	overall	989	0.225805
Figure 5	a	normPR distribution	ADMET	skin_sens	skin_sens	fcnn_fingerprint	3	Ordinary folds	overall	990	0.311465
Figure 5	a	normPR distribution	ADMET	skin_sens	skin_sens	fcnn_character	3	Ordinary folds	overall	991	0.340216
Figure 5	a	normPR distribution	ADMET	skin_sens	skin_sens	molclr	3	Ordinary folds	overall	992	0.18379
Figure 5	a	normPR distribution	ADMET	skin_sens	skin_sens	xgboost_fingerprint	3	Ordinary folds	overall	993	0.216262
Figure 5	a	normPR distribution	ADMET	skin_sens	skin_sens	xgboost_character	3	Ordinary folds	overall	994	0.167047
Figure 5	a	normPR distribution	ADMET	skin_sens	skin_sens	chemberta3	4	Ordinary folds	overall	995	0.68803
Figure 5	a	normPR distribution	ADMET	skin_sens	skin_sens	dmpnn	4	Ordinary folds	overall	996	0.55446
Figure 5	a	normPR distribution	ADMET	skin_sens	skin_sens	fcnn_fingerprint	4	Ordinary folds	overall	997	0.267874
Figure 5	a	normPR distribution	ADMET	skin_sens	skin_sens	fcnn_character	4	Ordinary folds	overall	998	0.307118
Figure 5	a	normPR distribution	ADMET	skin_sens	skin_sens	molclr	4	Ordinary folds	overall	999	0.08003
Figure 5	a	normPR distribution	ADMET	skin_sens	skin_sens	xgboost_fingerprint	4	Ordinary folds	overall	1000	0.503813
Figure 5	a	normPR distribution	ADMET	skin_sens	skin_sens	xgboost_character	4	Ordinary folds	overall	1001	0.582633
Figure 5	a	normPR distribution	ADMET	skin_sens	skin_sens	chemberta3	5	Ordinary folds	overall	1002	0.5279
Figure 5	a	normPR distribution	ADMET	skin_sens	skin_sens	dmpnn	5	Ordinary folds	overall	1003	0.496649
Figure 5	a	normPR distribution	ADMET	skin_sens	skin_sens	fcnn_fingerprint	5	Ordinary folds	overall	1004	-0.0264166
Figure 5	a	normPR distribution	ADMET	skin_sens	skin_sens	fcnn_character	5	Ordinary folds	overall	1005	0.516307
Figure 5	a	normPR distribution	ADMET	skin_sens	skin_sens	molclr	5	Ordinary folds	overall	1006	0.314913
Figure 5	a	normPR distribution	ADMET	skin_sens	skin_sens	xgboost_fingerprint	5	Ordinary folds	overall	1007	0.17419
Figure 5	a	normPR distribution	ADMET	skin_sens	skin_sens	xgboost_character	5	Ordinary folds	overall	1008	0.615761
Figure 5	a	normPR distribution	ADMET	sr_are	sr_are	chemberta3	2	Ordinary folds	overall	1009	0.219704
Figure 5	a	normPR distribution	ADMET	sr_are	sr_are	dmpnn	2	Ordinary folds	overall	1010	0.474189
Figure 5	a	normPR distribution	ADMET	sr_are	sr_are	fcnn_fingerprint	2	Ordinary folds	overall	1011	0.462454
Figure 5	a	normPR distribution	ADMET	sr_are	sr_are	fcnn_character	2	Ordinary folds	overall	1012	0.397254
Figure 5	a	normPR distribution	ADMET	sr_are	sr_are	molclr	2	Ordinary folds	overall	1013	0.170997
Figure 5	a	normPR distribution	ADMET	sr_are	sr_are	xgboost_fingerprint	2	Ordinary folds	overall	1014	0.446442
Figure 5	a	normPR distribution	ADMET	sr_are	sr_are	xgboost_character	2	Ordinary folds	overall	1015	0.412082
Figure 5	a	normPR distribution	ADMET	sr_are	sr_are	chemberta3	3	Ordinary folds	overall	1016	0.263889
Figure 5	a	normPR distribution	ADMET	sr_are	sr_are	dmpnn	3	Ordinary folds	overall	1017	0.194997
Figure 5	a	normPR distribution	ADMET	sr_are	sr_are	fcnn_fingerprint	3	Ordinary folds	overall	1018	0.200279
Figure 5	a	normPR distribution	ADMET	sr_are	sr_are	fcnn_character	3	Ordinary folds	overall	1019	0.355151
Figure 5	a	normPR distribution	ADMET	sr_are	sr_are	molclr	3	Ordinary folds	overall	1020	0.304903
Figure 5	a	normPR distribution	ADMET	sr_are	sr_are	xgboost_fingerprint	3	Ordinary folds	overall	1021	0.0569786
Figure 5	a	normPR distribution	ADMET	sr_are	sr_are	xgboost_character	3	Ordinary folds	overall	1022	0.312612
Figure 5	a	normPR distribution	ADMET	sr_are	sr_are	chemberta3	4	Ordinary folds	overall	1023	0.221933
Figure 5	a	normPR distribution	ADMET	sr_are	sr_are	dmpnn	4	Ordinary folds	overall	1024	0.29503
Figure 5	a	normPR distribution	ADMET	sr_are	sr_are	fcnn_fingerprint	4	Ordinary folds	overall	1025	0.089892
Figure 5	a	normPR distribution	ADMET	sr_are	sr_are	fcnn_character	4	Ordinary folds	overall	1026	0.29255
Figure 5	a	normPR distribution	ADMET	sr_are	sr_are	molclr	4	Ordinary folds	overall	1027	0.193039
Figure 5	a	normPR distribution	ADMET	sr_are	sr_are	xgboost_fingerprint	4	Ordinary folds	overall	1028	0.151724
Figure 5	a	normPR distribution	ADMET	sr_are	sr_are	xgboost_character	4	Ordinary folds	overall	1029	0.203313
Figure 5	a	normPR distribution	ADMET	sr_are	sr_are	chemberta3	5	Ordinary folds	overall	1030	0.319117
Figure 5	a	normPR distribution	ADMET	sr_are	sr_are	dmpnn	5	Ordinary folds	overall	1031	0.329867
Figure 5	a	normPR distribution	ADMET	sr_are	sr_are	fcnn_fingerprint	5	Ordinary folds	overall	1032	0.211552
Figure 5	a	normPR distribution	ADMET	sr_are	sr_are	fcnn_character	5	Ordinary folds	overall	1033	0.406825
Figure 5	a	normPR distribution	ADMET	sr_are	sr_are	molclr	5	Ordinary folds	overall	1034	0.196946
Figure 5	a	normPR distribution	ADMET	sr_are	sr_are	xgboost_fingerprint	5	Ordinary folds	overall	1035	0.339304
Figure 5	a	normPR distribution	ADMET	sr_are	sr_are	xgboost_character	5	Ordinary folds	overall	1036	0.349903
Figure 5	a	normPR distribution	ADMET	sr_are	sr_are	chemberta3	6	Ordinary folds	overall	1037	0.420615
Figure 5	a	normPR distribution	ADMET	sr_are	sr_are	dmpnn	6	Ordinary folds	overall	1038	0.327019
Figure 5	a	normPR distribution	ADMET	sr_are	sr_are	fcnn_fingerprint	6	Ordinary folds	overall	1039	0.335554
Figure 5	a	normPR distribution	ADMET	sr_are	sr_are	fcnn_character	6	Ordinary folds	overall	1040	0.455421
Figure 5	a	normPR distribution	ADMET	sr_are	sr_are	molclr	6	Ordinary folds	overall	1041	0.390785
Figure 5	a	normPR distribution	ADMET	sr_are	sr_are	xgboost_fingerprint	6	Ordinary folds	overall	1042	0.359761
Figure 5	a	normPR distribution	ADMET	sr_are	sr_are	xgboost_character	6	Ordinary folds	overall	1043	0.475348
Figure 5	a	normPR distribution	ADMET	sr_are	sr_are	chemberta3	7	Ordinary folds	overall	1044	0.38772
Figure 5	a	normPR distribution	ADMET	sr_are	sr_are	dmpnn	7	Ordinary folds	overall	1045	0.417748
Figure 5	a	normPR distribution	ADMET	sr_are	sr_are	fcnn_fingerprint	7	Ordinary folds	overall	1046	0.307218
Figure 5	a	normPR distribution	ADMET	sr_are	sr_are	fcnn_character	7	Ordinary folds	overall	1047	0.510658
Figure 5	a	normPR distribution	ADMET	sr_are	sr_are	molclr	7	Ordinary folds	overall	1048	0.307533
Figure 5	a	normPR distribution	ADMET	sr_are	sr_are	xgboost_fingerprint	7	Ordinary folds	overall	1049	0.417621
Figure 5	a	normPR distribution	ADMET	sr_are	sr_are	xgboost_character	7	Ordinary folds	overall	1050	0.444932
Figure 5	a	normPR distribution	ADMET	sr_are	sr_are	chemberta3	8	Ordinary folds	overall	1051	0.365083
Figure 5	a	normPR distribution	ADMET	sr_are	sr_are	dmpnn	8	Ordinary folds	overall	1052	0.340143
Figure 5	a	normPR distribution	ADMET	sr_are	sr_are	fcnn_fingerprint	8	Ordinary folds	overall	1053	0.17998
Figure 5	a	normPR distribution	ADMET	sr_are	sr_are	fcnn_character	8	Ordinary folds	overall	1054	0.109117
Figure 5	a	normPR distribution	ADMET	sr_are	sr_are	molclr	8	Ordinary folds	overall	1055	0.285982
Figure 5	a	normPR distribution	ADMET	sr_are	sr_are	xgboost_fingerprint	8	Ordinary folds	overall	1056	0.252004
Figure 5	a	normPR distribution	ADMET	sr_are	sr_are	xgboost_character	8	Ordinary folds	overall	1057	0.233661
Figure 5	a	normPR distribution	ADMET	sr_are	sr_are	chemberta3	9	Ordinary folds	overall	1058	0.409358
Figure 5	a	normPR distribution	ADMET	sr_are	sr_are	dmpnn	9	Ordinary folds	overall	1059	0.37776
Figure 5	a	normPR distribution	ADMET	sr_are	sr_are	fcnn_fingerprint	9	Ordinary folds	overall	1060	0.295493
Figure 5	a	normPR distribution	ADMET	sr_are	sr_are	fcnn_character	9	Ordinary folds	overall	1061	0.269828
Figure 5	a	normPR distribution	ADMET	sr_are	sr_are	molclr	9	Ordinary folds	overall	1062	0.234592
Figure 5	a	normPR distribution	ADMET	sr_are	sr_are	xgboost_fingerprint	9	Ordinary folds	overall	1063	0.483753
Figure 5	a	normPR distribution	ADMET	sr_are	sr_are	xgboost_character	9	Ordinary folds	overall	1064	0.274247
Figure 5	a	normPR distribution	ADMET	sr_are	sr_are	chemberta3	10	Ordinary folds	overall	1065	0.337472
Figure 5	a	normPR distribution	ADMET	sr_are	sr_are	dmpnn	10	Ordinary folds	overall	1066	0.424802
Figure 5	a	normPR distribution	ADMET	sr_are	sr_are	fcnn_fingerprint	10	Ordinary folds	overall	1067	0.114867
Figure 5	a	normPR distribution	ADMET	sr_are	sr_are	fcnn_character	10	Ordinary folds	overall	1068	0.336243
Figure 5	a	normPR distribution	ADMET	sr_are	sr_are	molclr	10	Ordinary folds	overall	1069	0.178308
Figure 5	a	normPR distribution	ADMET	sr_are	sr_are	xgboost_fingerprint	10	Ordinary folds	overall	1070	0.27634
Figure 5	a	normPR distribution	ADMET	sr_are	sr_are	xgboost_character	10	Ordinary folds	overall	1071	0.336715
Figure 5	a	normPR distribution	ADMET	sr_atad5	sr_atad5	chemberta3	2	Ordinary folds	overall	1072	0.159869
Figure 5	a	normPR distribution	ADMET	sr_atad5	sr_atad5	dmpnn	2	Ordinary folds	overall	1073	0.213324
Figure 5	a	normPR distribution	ADMET	sr_atad5	sr_atad5	fcnn_fingerprint	2	Ordinary folds	overall	1074	0.243337
Figure 5	a	normPR distribution	ADMET	sr_atad5	sr_atad5	fcnn_character	2	Ordinary folds	overall	1075	0.19011
Figure 5	a	normPR distribution	ADMET	sr_atad5	sr_atad5	molclr	2	Ordinary folds	overall	1076	0.144387
Figure 5	a	normPR distribution	ADMET	sr_atad5	sr_atad5	xgboost_fingerprint	2	Ordinary folds	overall	1077	0.300342
Figure 5	a	normPR distribution	ADMET	sr_atad5	sr_atad5	xgboost_character	2	Ordinary folds	overall	1078	0.263516
Figure 5	a	normPR distribution	ADMET	sr_atad5	sr_atad5	chemberta3	3	Ordinary folds	overall	1079	0.162179
Figure 5	a	normPR distribution	ADMET	sr_atad5	sr_atad5	dmpnn	3	Ordinary folds	overall	1080	0.197794
Figure 5	a	normPR distribution	ADMET	sr_atad5	sr_atad5	fcnn_fingerprint	3	Ordinary folds	overall	1081	0.163285
Figure 5	a	normPR distribution	ADMET	sr_atad5	sr_atad5	fcnn_character	3	Ordinary folds	overall	1082	0.244799
Figure 5	a	normPR distribution	ADMET	sr_atad5	sr_atad5	molclr	3	Ordinary folds	overall	1083	0.105534
Figure 5	a	normPR distribution	ADMET	sr_atad5	sr_atad5	xgboost_fingerprint	3	Ordinary folds	overall	1084	0.217708
Figure 5	a	normPR distribution	ADMET	sr_atad5	sr_atad5	xgboost_character	3	Ordinary folds	overall	1085	0.270719
Figure 5	a	normPR distribution	ADMET	sr_atad5	sr_atad5	chemberta3	4	Ordinary folds	overall	1086	0.171477
Figure 5	a	normPR distribution	ADMET	sr_atad5	sr_atad5	dmpnn	4	Ordinary folds	overall	1087	0.246202
Figure 5	a	normPR distribution	ADMET	sr_atad5	sr_atad5	fcnn_fingerprint	4	Ordinary folds	overall	1088	0.141845
Figure 5	a	normPR distribution	ADMET	sr_atad5	sr_atad5	fcnn_character	4	Ordinary folds	overall	1089	0.176348
Figure 5	a	normPR distribution	ADMET	sr_atad5	sr_atad5	molclr	4	Ordinary folds	overall	1090	0.258605
Figure 5	a	normPR distribution	ADMET	sr_atad5	sr_atad5	xgboost_fingerprint	4	Ordinary folds	overall	1091	0.261715
Figure 5	a	normPR distribution	ADMET	sr_atad5	sr_atad5	xgboost_character	4	Ordinary folds	overall	1092	0.126563
Figure 5	a	normPR distribution	ADMET	sr_atad5	sr_atad5	chemberta3	5	Ordinary folds	overall	1093	0.324102
Figure 5	a	normPR distribution	ADMET	sr_atad5	sr_atad5	dmpnn	5	Ordinary folds	overall	1094	0.437507
Figure 5	a	normPR distribution	ADMET	sr_atad5	sr_atad5	fcnn_fingerprint	5	Ordinary folds	overall	1095	0.157746
Figure 5	a	normPR distribution	ADMET	sr_atad5	sr_atad5	fcnn_character	5	Ordinary folds	overall	1096	0.425025
Figure 5	a	normPR distribution	ADMET	sr_atad5	sr_atad5	molclr	5	Ordinary folds	overall	1097	0.196801
Figure 5	a	normPR distribution	ADMET	sr_atad5	sr_atad5	xgboost_fingerprint	5	Ordinary folds	overall	1098	0.436526
Figure 5	a	normPR distribution	ADMET	sr_atad5	sr_atad5	xgboost_character	5	Ordinary folds	overall	1099	0.458881
Figure 5	a	normPR distribution	ADMET	sr_atad5	sr_atad5	chemberta3	6	Ordinary folds	overall	1100	0.323568
Figure 5	a	normPR distribution	ADMET	sr_atad5	sr_atad5	dmpnn	6	Ordinary folds	overall	1101	0.261123
Figure 5	a	normPR distribution	ADMET	sr_atad5	sr_atad5	fcnn_fingerprint	6	Ordinary folds	overall	1102	0.0453468
Figure 5	a	normPR distribution	ADMET	sr_atad5	sr_atad5	fcnn_character	6	Ordinary folds	overall	1103	0.170036
Figure 5	a	normPR distribution	ADMET	sr_atad5	sr_atad5	molclr	6	Ordinary folds	overall	1104	0.0580821
Figure 5	a	normPR distribution	ADMET	sr_atad5	sr_atad5	xgboost_fingerprint	6	Ordinary folds	overall	1105	0.243318
Figure 5	a	normPR distribution	ADMET	sr_atad5	sr_atad5	xgboost_character	6	Ordinary folds	overall	1106	0.256634
Figure 5	a	normPR distribution	ADMET	sr_atad5	sr_atad5	chemberta3	7	Ordinary folds	overall	1107	0.100388
Figure 5	a	normPR distribution	ADMET	sr_atad5	sr_atad5	dmpnn	7	Ordinary folds	overall	1108	0.256833
Figure 5	a	normPR distribution	ADMET	sr_atad5	sr_atad5	fcnn_fingerprint	7	Ordinary folds	overall	1109	0.241336
Figure 5	a	normPR distribution	ADMET	sr_atad5	sr_atad5	fcnn_character	7	Ordinary folds	overall	1110	0.184845
Figure 5	a	normPR distribution	ADMET	sr_atad5	sr_atad5	molclr	7	Ordinary folds	overall	1111	0.135659
Figure 5	a	normPR distribution	ADMET	sr_atad5	sr_atad5	xgboost_fingerprint	7	Ordinary folds	overall	1112	0.189107
Figure 5	a	normPR distribution	ADMET	sr_atad5	sr_atad5	xgboost_character	7	Ordinary folds	overall	1113	0.163683
Figure 5	a	normPR distribution	ADMET	sr_atad5	sr_atad5	chemberta3	8	Ordinary folds	overall	1114	0.0455118
Figure 5	a	normPR distribution	ADMET	sr_atad5	sr_atad5	dmpnn	8	Ordinary folds	overall	1115	0.227388
Figure 5	a	normPR distribution	ADMET	sr_atad5	sr_atad5	fcnn_fingerprint	8	Ordinary folds	overall	1116	0.418999
Figure 5	a	normPR distribution	ADMET	sr_atad5	sr_atad5	fcnn_character	8	Ordinary folds	overall	1117	0.143056
Figure 5	a	normPR distribution	ADMET	sr_atad5	sr_atad5	molclr	8	Ordinary folds	overall	1118	0.12265
Figure 5	a	normPR distribution	ADMET	sr_atad5	sr_atad5	xgboost_fingerprint	8	Ordinary folds	overall	1119	0.358082
Figure 5	a	normPR distribution	ADMET	sr_atad5	sr_atad5	xgboost_character	8	Ordinary folds	overall	1120	0.194963
Figure 5	a	normPR distribution	ADMET	sr_atad5	sr_atad5	chemberta3	9	Ordinary folds	overall	1121	0.146044
Figure 5	a	normPR distribution	ADMET	sr_atad5	sr_atad5	dmpnn	9	Ordinary folds	overall	1122	0.156521
Figure 5	a	normPR distribution	ADMET	sr_atad5	sr_atad5	fcnn_fingerprint	9	Ordinary folds	overall	1123	0.165747
Figure 5	a	normPR distribution	ADMET	sr_atad5	sr_atad5	fcnn_character	9	Ordinary folds	overall	1124	0.18295
Figure 5	a	normPR distribution	ADMET	sr_atad5	sr_atad5	molclr	9	Ordinary folds	overall	1125	0.253661
Figure 5	a	normPR distribution	ADMET	sr_atad5	sr_atad5	xgboost_fingerprint	9	Ordinary folds	overall	1126	0.218032
Figure 5	a	normPR distribution	ADMET	sr_atad5	sr_atad5	xgboost_character	9	Ordinary folds	overall	1127	0.284981
Figure 5	a	normPR distribution	ADMET	sr_atad5	sr_atad5	chemberta3	10	Ordinary folds	overall	1128	0.121877
Figure 5	a	normPR distribution	ADMET	sr_atad5	sr_atad5	dmpnn	10	Ordinary folds	overall	1129	0.107184
Figure 5	a	normPR distribution	ADMET	sr_atad5	sr_atad5	fcnn_fingerprint	10	Ordinary folds	overall	1130	0.0388628
Figure 5	a	normPR distribution	ADMET	sr_atad5	sr_atad5	fcnn_character	10	Ordinary folds	overall	1131	0.0726176
Figure 5	a	normPR distribution	ADMET	sr_atad5	sr_atad5	molclr	10	Ordinary folds	overall	1132	0.0870569
Figure 5	a	normPR distribution	ADMET	sr_atad5	sr_atad5	xgboost_fingerprint	10	Ordinary folds	overall	1133	0.0607704
Figure 5	a	normPR distribution	ADMET	sr_atad5	sr_atad5	xgboost_character	10	Ordinary folds	overall	1134	0.0885926
Figure 5	a	normPR distribution	ADMET	sr_hse	sr_hse	chemberta3	2	Ordinary folds	overall	1135	0.221153
Figure 5	a	normPR distribution	ADMET	sr_hse	sr_hse	dmpnn	2	Ordinary folds	overall	1136	0.20964
Figure 5	a	normPR distribution	ADMET	sr_hse	sr_hse	fcnn_fingerprint	2	Ordinary folds	overall	1137	0.262408
Figure 5	a	normPR distribution	ADMET	sr_hse	sr_hse	fcnn_character	2	Ordinary folds	overall	1138	0.140275
Figure 5	a	normPR distribution	ADMET	sr_hse	sr_hse	molclr	2	Ordinary folds	overall	1139	0.0722702
Figure 5	a	normPR distribution	ADMET	sr_hse	sr_hse	xgboost_fingerprint	2	Ordinary folds	overall	1140	0.229787
Figure 5	a	normPR distribution	ADMET	sr_hse	sr_hse	xgboost_character	2	Ordinary folds	overall	1141	0.237439
Figure 5	a	normPR distribution	ADMET	sr_hse	sr_hse	chemberta3	3	Ordinary folds	overall	1142	0.321541
Figure 5	a	normPR distribution	ADMET	sr_hse	sr_hse	dmpnn	3	Ordinary folds	overall	1143	0.220743
Figure 5	a	normPR distribution	ADMET	sr_hse	sr_hse	fcnn_fingerprint	3	Ordinary folds	overall	1144	0.0473589
Figure 5	a	normPR distribution	ADMET	sr_hse	sr_hse	fcnn_character	3	Ordinary folds	overall	1145	0.184899
Figure 5	a	normPR distribution	ADMET	sr_hse	sr_hse	molclr	3	Ordinary folds	overall	1146	0.262409
Figure 5	a	normPR distribution	ADMET	sr_hse	sr_hse	xgboost_fingerprint	3	Ordinary folds	overall	1147	0.12843
Figure 5	a	normPR distribution	ADMET	sr_hse	sr_hse	xgboost_character	3	Ordinary folds	overall	1148	0.16782
Figure 5	a	normPR distribution	ADMET	sr_hse	sr_hse	chemberta3	4	Ordinary folds	overall	1149	0.174115
Figure 5	a	normPR distribution	ADMET	sr_hse	sr_hse	dmpnn	4	Ordinary folds	overall	1150	0.268727
Figure 5	a	normPR distribution	ADMET	sr_hse	sr_hse	fcnn_fingerprint	4	Ordinary folds	overall	1151	0.245284
Figure 5	a	normPR distribution	ADMET	sr_hse	sr_hse	fcnn_character	4	Ordinary folds	overall	1152	0.246778
Figure 5	a	normPR distribution	ADMET	sr_hse	sr_hse	molclr	4	Ordinary folds	overall	1153	0.315195
Figure 5	a	normPR distribution	ADMET	sr_hse	sr_hse	xgboost_fingerprint	4	Ordinary folds	overall	1154	0.31136
Figure 5	a	normPR distribution	ADMET	sr_hse	sr_hse	xgboost_character	4	Ordinary folds	overall	1155	0.147541
Figure 5	a	normPR distribution	ADMET	sr_hse	sr_hse	chemberta3	5	Ordinary folds	overall	1156	0.0705407
Figure 5	a	normPR distribution	ADMET	sr_hse	sr_hse	dmpnn	5	Ordinary folds	overall	1157	0.0687057
Figure 5	a	normPR distribution	ADMET	sr_hse	sr_hse	fcnn_fingerprint	5	Ordinary folds	overall	1158	0.00695946
Figure 5	a	normPR distribution	ADMET	sr_hse	sr_hse	fcnn_character	5	Ordinary folds	overall	1159	0.140215
Figure 5	a	normPR distribution	ADMET	sr_hse	sr_hse	molclr	5	Ordinary folds	overall	1160	0.0451424
Figure 5	a	normPR distribution	ADMET	sr_hse	sr_hse	xgboost_fingerprint	5	Ordinary folds	overall	1161	0.0510724
Figure 5	a	normPR distribution	ADMET	sr_hse	sr_hse	xgboost_character	5	Ordinary folds	overall	1162	0.146681
Figure 5	a	normPR distribution	ADMET	sr_hse	sr_hse	chemberta3	6	Ordinary folds	overall	1163	0.125678
Figure 5	a	normPR distribution	ADMET	sr_hse	sr_hse	dmpnn	6	Ordinary folds	overall	1164	0.190145
Figure 5	a	normPR distribution	ADMET	sr_hse	sr_hse	fcnn_fingerprint	6	Ordinary folds	overall	1165	0.223485
Figure 5	a	normPR distribution	ADMET	sr_hse	sr_hse	fcnn_character	6	Ordinary folds	overall	1166	0.227353
Figure 5	a	normPR distribution	ADMET	sr_hse	sr_hse	molclr	6	Ordinary folds	overall	1167	0.21243
Figure 5	a	normPR distribution	ADMET	sr_hse	sr_hse	xgboost_fingerprint	6	Ordinary folds	overall	1168	0.209881
Figure 5	a	normPR distribution	ADMET	sr_hse	sr_hse	xgboost_character	6	Ordinary folds	overall	1169	0.160324
Figure 5	a	normPR distribution	ADMET	sr_hse	sr_hse	chemberta3	7	Ordinary folds	overall	1170	0.298626
Figure 5	a	normPR distribution	ADMET	sr_hse	sr_hse	dmpnn	7	Ordinary folds	overall	1171	0.346351
Figure 5	a	normPR distribution	ADMET	sr_hse	sr_hse	fcnn_fingerprint	7	Ordinary folds	overall	1172	0.272315
Figure 5	a	normPR distribution	ADMET	sr_hse	sr_hse	fcnn_character	7	Ordinary folds	overall	1173	0.448533
Figure 5	a	normPR distribution	ADMET	sr_hse	sr_hse	molclr	7	Ordinary folds	overall	1174	0.233982
Figure 5	a	normPR distribution	ADMET	sr_hse	sr_hse	xgboost_fingerprint	7	Ordinary folds	overall	1175	0.276112
Figure 5	a	normPR distribution	ADMET	sr_hse	sr_hse	xgboost_character	7	Ordinary folds	overall	1176	0.218026
Figure 5	a	normPR distribution	ADMET	sr_hse	sr_hse	chemberta3	8	Ordinary folds	overall	1177	0.245802
Figure 5	a	normPR distribution	ADMET	sr_hse	sr_hse	dmpnn	8	Ordinary folds	overall	1178	0.312846
Figure 5	a	normPR distribution	ADMET	sr_hse	sr_hse	fcnn_fingerprint	8	Ordinary folds	overall	1179	0.0782474
Figure 5	a	normPR distribution	ADMET	sr_hse	sr_hse	fcnn_character	8	Ordinary folds	overall	1180	0.390048
Figure 5	a	normPR distribution	ADMET	sr_hse	sr_hse	molclr	8	Ordinary folds	overall	1181	0.175284
Figure 5	a	normPR distribution	ADMET	sr_hse	sr_hse	xgboost_fingerprint	8	Ordinary folds	overall	1182	0.125714
Figure 5	a	normPR distribution	ADMET	sr_hse	sr_hse	xgboost_character	8	Ordinary folds	overall	1183	0.406586
Figure 5	a	normPR distribution	ADMET	sr_hse	sr_hse	chemberta3	9	Ordinary folds	overall	1184	0.250342
Figure 5	a	normPR distribution	ADMET	sr_hse	sr_hse	dmpnn	9	Ordinary folds	overall	1185	0.169972
Figure 5	a	normPR distribution	ADMET	sr_hse	sr_hse	fcnn_fingerprint	9	Ordinary folds	overall	1186	0.0161147
Figure 5	a	normPR distribution	ADMET	sr_hse	sr_hse	fcnn_character	9	Ordinary folds	overall	1187	0.287287
Figure 5	a	normPR distribution	ADMET	sr_hse	sr_hse	molclr	9	Ordinary folds	overall	1188	0.271199
Figure 5	a	normPR distribution	ADMET	sr_hse	sr_hse	xgboost_fingerprint	9	Ordinary folds	overall	1189	0.150818
Figure 5	a	normPR distribution	ADMET	sr_hse	sr_hse	xgboost_character	9	Ordinary folds	overall	1190	0.265548
Figure 5	a	normPR distribution	ADMET	sr_hse	sr_hse	chemberta3	10	Ordinary folds	overall	1191	0.248106
Figure 5	a	normPR distribution	ADMET	sr_hse	sr_hse	dmpnn	10	Ordinary folds	overall	1192	0.291213
Figure 5	a	normPR distribution	ADMET	sr_hse	sr_hse	fcnn_fingerprint	10	Ordinary folds	overall	1193	0.060784
Figure 5	a	normPR distribution	ADMET	sr_hse	sr_hse	fcnn_character	10	Ordinary folds	overall	1194	0.318775
Figure 5	a	normPR distribution	ADMET	sr_hse	sr_hse	molclr	10	Ordinary folds	overall	1195	0.298303
Figure 5	a	normPR distribution	ADMET	sr_hse	sr_hse	xgboost_fingerprint	10	Ordinary folds	overall	1196	0.235814
Figure 5	a	normPR distribution	ADMET	sr_hse	sr_hse	xgboost_character	10	Ordinary folds	overall	1197	0.325343
Figure 5	a	normPR distribution	ADMET	sr_mmp	sr_mmp	chemberta3	2	Ordinary folds	overall	1198	0.788501
Figure 5	a	normPR distribution	ADMET	sr_mmp	sr_mmp	dmpnn	2	Ordinary folds	overall	1199	0.702593
Figure 5	a	normPR distribution	ADMET	sr_mmp	sr_mmp	fcnn_fingerprint	2	Ordinary folds	overall	1200	0.594668
Figure 5	a	normPR distribution	ADMET	sr_mmp	sr_mmp	fcnn_character	2	Ordinary folds	overall	1201	0.751752
Figure 5	a	normPR distribution	ADMET	sr_mmp	sr_mmp	molclr	2	Ordinary folds	overall	1202	0.631909
Figure 5	a	normPR distribution	ADMET	sr_mmp	sr_mmp	xgboost_fingerprint	2	Ordinary folds	overall	1203	0.701052
Figure 5	a	normPR distribution	ADMET	sr_mmp	sr_mmp	xgboost_character	2	Ordinary folds	overall	1204	0.76244
Figure 5	a	normPR distribution	ADMET	sr_mmp	sr_mmp	chemberta3	3	Ordinary folds	overall	1205	0.483267
Figure 5	a	normPR distribution	ADMET	sr_mmp	sr_mmp	dmpnn	3	Ordinary folds	overall	1206	0.554285
Figure 5	a	normPR distribution	ADMET	sr_mmp	sr_mmp	fcnn_fingerprint	3	Ordinary folds	overall	1207	0.459864
Figure 5	a	normPR distribution	ADMET	sr_mmp	sr_mmp	fcnn_character	3	Ordinary folds	overall	1208	0.390472
Figure 5	a	normPR distribution	ADMET	sr_mmp	sr_mmp	molclr	3	Ordinary folds	overall	1209	0.491457
Figure 5	a	normPR distribution	ADMET	sr_mmp	sr_mmp	xgboost_fingerprint	3	Ordinary folds	overall	1210	0.471732
Figure 5	a	normPR distribution	ADMET	sr_mmp	sr_mmp	xgboost_character	3	Ordinary folds	overall	1211	0.498208
Figure 5	a	normPR distribution	ADMET	sr_mmp	sr_mmp	chemberta3	4	Ordinary folds	overall	1212	0.556721
Figure 5	a	normPR distribution	ADMET	sr_mmp	sr_mmp	dmpnn	4	Ordinary folds	overall	1213	0.616088
Figure 5	a	normPR distribution	ADMET	sr_mmp	sr_mmp	fcnn_fingerprint	4	Ordinary folds	overall	1214	0.516703
Figure 5	a	normPR distribution	ADMET	sr_mmp	sr_mmp	fcnn_character	4	Ordinary folds	overall	1215	0.643545
Figure 5	a	normPR distribution	ADMET	sr_mmp	sr_mmp	molclr	4	Ordinary folds	overall	1216	0.514532
Figure 5	a	normPR distribution	ADMET	sr_mmp	sr_mmp	xgboost_fingerprint	4	Ordinary folds	overall	1217	0.618084
Figure 5	a	normPR distribution	ADMET	sr_mmp	sr_mmp	xgboost_character	4	Ordinary folds	overall	1218	0.609487
Figure 5	a	normPR distribution	ADMET	sr_mmp	sr_mmp	chemberta3	5	Ordinary folds	overall	1219	0.538377
Figure 5	a	normPR distribution	ADMET	sr_mmp	sr_mmp	dmpnn	5	Ordinary folds	overall	1220	0.622098
Figure 5	a	normPR distribution	ADMET	sr_mmp	sr_mmp	fcnn_fingerprint	5	Ordinary folds	overall	1221	0.457479
Figure 5	a	normPR distribution	ADMET	sr_mmp	sr_mmp	fcnn_character	5	Ordinary folds	overall	1222	0.607879
Figure 5	a	normPR distribution	ADMET	sr_mmp	sr_mmp	molclr	5	Ordinary folds	overall	1223	0.404535
Figure 5	a	normPR distribution	ADMET	sr_mmp	sr_mmp	xgboost_fingerprint	5	Ordinary folds	overall	1224	0.116899
Figure 5	a	normPR distribution	ADMET	sr_mmp	sr_mmp	xgboost_character	5	Ordinary folds	overall	1225	0.617037
Figure 5	a	normPR distribution	ADMET	sr_mmp	sr_mmp	chemberta3	6	Ordinary folds	overall	1226	0.486858
Figure 5	a	normPR distribution	ADMET	sr_mmp	sr_mmp	dmpnn	6	Ordinary folds	overall	1227	0.370151
Figure 5	a	normPR distribution	ADMET	sr_mmp	sr_mmp	fcnn_fingerprint	6	Ordinary folds	overall	1228	0.34119
Figure 5	a	normPR distribution	ADMET	sr_mmp	sr_mmp	fcnn_character	6	Ordinary folds	overall	1229	0.474089
Figure 5	a	normPR distribution	ADMET	sr_mmp	sr_mmp	molclr	6	Ordinary folds	overall	1230	0.310848
Figure 5	a	normPR distribution	ADMET	sr_mmp	sr_mmp	xgboost_fingerprint	6	Ordinary folds	overall	1231	0.394528
Figure 5	a	normPR distribution	ADMET	sr_mmp	sr_mmp	xgboost_character	6	Ordinary folds	overall	1232	0.482169
Figure 5	a	normPR distribution	ADMET	sr_mmp	sr_mmp	chemberta3	7	Ordinary folds	overall	1233	0.57318
Figure 5	a	normPR distribution	ADMET	sr_mmp	sr_mmp	dmpnn	7	Ordinary folds	overall	1234	0.625454
Figure 5	a	normPR distribution	ADMET	sr_mmp	sr_mmp	fcnn_fingerprint	7	Ordinary folds	overall	1235	0.482497
Figure 5	a	normPR distribution	ADMET	sr_mmp	sr_mmp	fcnn_character	7	Ordinary folds	overall	1236	0.643748
Figure 5	a	normPR distribution	ADMET	sr_mmp	sr_mmp	molclr	7	Ordinary folds	overall	1237	0.523293
Figure 5	a	normPR distribution	ADMET	sr_mmp	sr_mmp	xgboost_fingerprint	7	Ordinary folds	overall	1238	0.507395
Figure 5	a	normPR distribution	ADMET	sr_mmp	sr_mmp	xgboost_character	7	Ordinary folds	overall	1239	0.610094
Figure 5	a	normPR distribution	ADMET	sr_mmp	sr_mmp	chemberta3	8	Ordinary folds	overall	1240	0.539387
Figure 5	a	normPR distribution	ADMET	sr_mmp	sr_mmp	dmpnn	8	Ordinary folds	overall	1241	0.556613
Figure 5	a	normPR distribution	ADMET	sr_mmp	sr_mmp	fcnn_fingerprint	8	Ordinary folds	overall	1242	0.491571
Figure 5	a	normPR distribution	ADMET	sr_mmp	sr_mmp	fcnn_character	8	Ordinary folds	overall	1243	0.50568
Figure 5	a	normPR distribution	ADMET	sr_mmp	sr_mmp	molclr	8	Ordinary folds	overall	1244	0.404772
Figure 5	a	normPR distribution	ADMET	sr_mmp	sr_mmp	xgboost_fingerprint	8	Ordinary folds	overall	1245	0.521466
Figure 5	a	normPR distribution	ADMET	sr_mmp	sr_mmp	xgboost_character	8	Ordinary folds	overall	1246	0.52506
Figure 5	a	normPR distribution	ADMET	sr_mmp	sr_mmp	chemberta3	9	Ordinary folds	overall	1247	0.660753
Figure 5	a	normPR distribution	ADMET	sr_mmp	sr_mmp	dmpnn	9	Ordinary folds	overall	1248	0.54188
Figure 5	a	normPR distribution	ADMET	sr_mmp	sr_mmp	fcnn_fingerprint	9	Ordinary folds	overall	1249	0.473136
Figure 5	a	normPR distribution	ADMET	sr_mmp	sr_mmp	fcnn_character	9	Ordinary folds	overall	1250	0.55907
Figure 5	a	normPR distribution	ADMET	sr_mmp	sr_mmp	molclr	9	Ordinary folds	overall	1251	0.57391
Figure 5	a	normPR distribution	ADMET	sr_mmp	sr_mmp	xgboost_fingerprint	9	Ordinary folds	overall	1252	0.56405
Figure 5	a	normPR distribution	ADMET	sr_mmp	sr_mmp	xgboost_character	9	Ordinary folds	overall	1253	0.638308
Figure 5	a	normPR distribution	ADMET	sr_mmp	sr_mmp	chemberta3	10	Ordinary folds	overall	1254	0.426082
Figure 5	a	normPR distribution	ADMET	sr_mmp	sr_mmp	dmpnn	10	Ordinary folds	overall	1255	0.490973
Figure 5	a	normPR distribution	ADMET	sr_mmp	sr_mmp	fcnn_fingerprint	10	Ordinary folds	overall	1256	0.350565
Figure 5	a	normPR distribution	ADMET	sr_mmp	sr_mmp	fcnn_character	10	Ordinary folds	overall	1257	0.432316
Figure 5	a	normPR distribution	ADMET	sr_mmp	sr_mmp	molclr	10	Ordinary folds	overall	1258	0.420005
Figure 5	a	normPR distribution	ADMET	sr_mmp	sr_mmp	xgboost_fingerprint	10	Ordinary folds	overall	1259	0.47853
Figure 5	a	normPR distribution	ADMET	sr_mmp	sr_mmp	xgboost_character	10	Ordinary folds	overall	1260	0.423341
Figure 5	a	normPR distribution	ADMET	sr_p53	sr_p53	chemberta3	2	Ordinary folds	overall	1261	0.248773
Figure 5	a	normPR distribution	ADMET	sr_p53	sr_p53	dmpnn	2	Ordinary folds	overall	1262	0.393291
Figure 5	a	normPR distribution	ADMET	sr_p53	sr_p53	fcnn_fingerprint	2	Ordinary folds	overall	1263	0.366802
Figure 5	a	normPR distribution	ADMET	sr_p53	sr_p53	fcnn_character	2	Ordinary folds	overall	1264	0.359336
Figure 5	a	normPR distribution	ADMET	sr_p53	sr_p53	molclr	2	Ordinary folds	overall	1265	0.250477
Figure 5	a	normPR distribution	ADMET	sr_p53	sr_p53	xgboost_fingerprint	2	Ordinary folds	overall	1266	0.426097
Figure 5	a	normPR distribution	ADMET	sr_p53	sr_p53	xgboost_character	2	Ordinary folds	overall	1267	0.385613
Figure 5	a	normPR distribution	ADMET	sr_p53	sr_p53	chemberta3	3	Ordinary folds	overall	1268	0.115494
Figure 5	a	normPR distribution	ADMET	sr_p53	sr_p53	dmpnn	3	Ordinary folds	overall	1269	0.352258
Figure 5	a	normPR distribution	ADMET	sr_p53	sr_p53	fcnn_fingerprint	3	Ordinary folds	overall	1270	0.130754
Figure 5	a	normPR distribution	ADMET	sr_p53	sr_p53	fcnn_character	3	Ordinary folds	overall	1271	0.168487
Figure 5	a	normPR distribution	ADMET	sr_p53	sr_p53	molclr	3	Ordinary folds	overall	1272	0.193133
Figure 5	a	normPR distribution	ADMET	sr_p53	sr_p53	xgboost_fingerprint	3	Ordinary folds	overall	1273	0.278912
Figure 5	a	normPR distribution	ADMET	sr_p53	sr_p53	xgboost_character	3	Ordinary folds	overall	1274	0.132646
Figure 5	a	normPR distribution	ADMET	sr_p53	sr_p53	chemberta3	4	Ordinary folds	overall	1275	0.169407
Figure 5	a	normPR distribution	ADMET	sr_p53	sr_p53	dmpnn	4	Ordinary folds	overall	1276	0.255204
Figure 5	a	normPR distribution	ADMET	sr_p53	sr_p53	fcnn_fingerprint	4	Ordinary folds	overall	1277	0.0825133
Figure 5	a	normPR distribution	ADMET	sr_p53	sr_p53	fcnn_character	4	Ordinary folds	overall	1278	0.209869
Figure 5	a	normPR distribution	ADMET	sr_p53	sr_p53	molclr	4	Ordinary folds	overall	1279	0.278458
Figure 5	a	normPR distribution	ADMET	sr_p53	sr_p53	xgboost_fingerprint	4	Ordinary folds	overall	1280	0.122964
Figure 5	a	normPR distribution	ADMET	sr_p53	sr_p53	xgboost_character	4	Ordinary folds	overall	1281	0.261482
Figure 5	a	normPR distribution	ADMET	sr_p53	sr_p53	chemberta3	5	Ordinary folds	overall	1282	0.252635
Figure 5	a	normPR distribution	ADMET	sr_p53	sr_p53	dmpnn	5	Ordinary folds	overall	1283	0.370028
Figure 5	a	normPR distribution	ADMET	sr_p53	sr_p53	fcnn_fingerprint	5	Ordinary folds	overall	1284	0.131404
Figure 5	a	normPR distribution	ADMET	sr_p53	sr_p53	fcnn_character	5	Ordinary folds	overall	1285	0.292144
Figure 5	a	normPR distribution	ADMET	sr_p53	sr_p53	molclr	5	Ordinary folds	overall	1286	0.384786
Figure 5	a	normPR distribution	ADMET	sr_p53	sr_p53	xgboost_fingerprint	5	Ordinary folds	overall	1287	0.342383
Figure 5	a	normPR distribution	ADMET	sr_p53	sr_p53	xgboost_character	5	Ordinary folds	overall	1288	0.349408
Figure 5	a	normPR distribution	ADMET	sr_p53	sr_p53	chemberta3	6	Ordinary folds	overall	1289	0.139915
Figure 5	a	normPR distribution	ADMET	sr_p53	sr_p53	dmpnn	6	Ordinary folds	overall	1290	0.265998
Figure 5	a	normPR distribution	ADMET	sr_p53	sr_p53	fcnn_fingerprint	6	Ordinary folds	overall	1291	0.289863
Figure 5	a	normPR distribution	ADMET	sr_p53	sr_p53	fcnn_character	6	Ordinary folds	overall	1292	0.33461
Figure 5	a	normPR distribution	ADMET	sr_p53	sr_p53	molclr	6	Ordinary folds	overall	1293	0.186253
Figure 5	a	normPR distribution	ADMET	sr_p53	sr_p53	xgboost_fingerprint	6	Ordinary folds	overall	1294	0.234639
Figure 5	a	normPR distribution	ADMET	sr_p53	sr_p53	xgboost_character	6	Ordinary folds	overall	1295	0.354356
Figure 5	a	normPR distribution	ADMET	sr_p53	sr_p53	chemberta3	7	Ordinary folds	overall	1296	0.056933
Figure 5	a	normPR distribution	ADMET	sr_p53	sr_p53	dmpnn	7	Ordinary folds	overall	1297	0.318279
Figure 5	a	normPR distribution	ADMET	sr_p53	sr_p53	fcnn_fingerprint	7	Ordinary folds	overall	1298	0.234813
Figure 5	a	normPR distribution	ADMET	sr_p53	sr_p53	fcnn_character	7	Ordinary folds	overall	1299	0.167488
Figure 5	a	normPR distribution	ADMET	sr_p53	sr_p53	molclr	7	Ordinary folds	overall	1300	0.0665973
Figure 5	a	normPR distribution	ADMET	sr_p53	sr_p53	xgboost_fingerprint	7	Ordinary folds	overall	1301	0.311038
Figure 5	a	normPR distribution	ADMET	sr_p53	sr_p53	xgboost_character	7	Ordinary folds	overall	1302	0.308264
Figure 5	a	normPR distribution	ADMET	sr_p53	sr_p53	chemberta3	8	Ordinary folds	overall	1303	0.137763
Figure 5	a	normPR distribution	ADMET	sr_p53	sr_p53	dmpnn	8	Ordinary folds	overall	1304	0.120955
Figure 5	a	normPR distribution	ADMET	sr_p53	sr_p53	fcnn_fingerprint	8	Ordinary folds	overall	1305	0.178599
Figure 5	a	normPR distribution	ADMET	sr_p53	sr_p53	fcnn_character	8	Ordinary folds	overall	1306	0.319025
Figure 5	a	normPR distribution	ADMET	sr_p53	sr_p53	molclr	8	Ordinary folds	overall	1307	0.151473
Figure 5	a	normPR distribution	ADMET	sr_p53	sr_p53	xgboost_fingerprint	8	Ordinary folds	overall	1308	0.266999
Figure 5	a	normPR distribution	ADMET	sr_p53	sr_p53	xgboost_character	8	Ordinary folds	overall	1309	0.22501
Figure 5	a	normPR distribution	ADMET	sr_p53	sr_p53	chemberta3	9	Ordinary folds	overall	1310	0.270788
Figure 5	a	normPR distribution	ADMET	sr_p53	sr_p53	dmpnn	9	Ordinary folds	overall	1311	0.491861
Figure 5	a	normPR distribution	ADMET	sr_p53	sr_p53	fcnn_fingerprint	9	Ordinary folds	overall	1312	0.233338
Figure 5	a	normPR distribution	ADMET	sr_p53	sr_p53	fcnn_character	9	Ordinary folds	overall	1313	0.283285
Figure 5	a	normPR distribution	ADMET	sr_p53	sr_p53	molclr	9	Ordinary folds	overall	1314	0.226945
Figure 5	a	normPR distribution	ADMET	sr_p53	sr_p53	xgboost_fingerprint	9	Ordinary folds	overall	1315	0.448987
Figure 5	a	normPR distribution	ADMET	sr_p53	sr_p53	xgboost_character	9	Ordinary folds	overall	1316	0.419064
Figure 5	a	normPR distribution	ADMET	sr_p53	sr_p53	chemberta3	10	Ordinary folds	overall	1317	0.139237
Figure 5	a	normPR distribution	ADMET	sr_p53	sr_p53	dmpnn	10	Ordinary folds	overall	1318	0.270754
Figure 5	a	normPR distribution	ADMET	sr_p53	sr_p53	fcnn_fingerprint	10	Ordinary folds	overall	1319	0.0396274
Figure 5	a	normPR distribution	ADMET	sr_p53	sr_p53	fcnn_character	10	Ordinary folds	overall	1320	0.135028
Figure 5	a	normPR distribution	ADMET	sr_p53	sr_p53	molclr	10	Ordinary folds	overall	1321	0.127238
Figure 5	a	normPR distribution	ADMET	sr_p53	sr_p53	xgboost_fingerprint	10	Ordinary folds	overall	1322	0.142147
Figure 5	a	normPR distribution	ADMET	sr_p53	sr_p53	xgboost_character	10	Ordinary folds	overall	1323	0.390725
Figure 5	a	normPR distribution	MoleculeNet	sider	Blood and lymphatic system disorders	chemberta3	2	Ordinary folds	overall	1324	0.220088
Figure 5	a	normPR distribution	MoleculeNet	sider	Blood and lymphatic system disorders	dmpnn	2	Ordinary folds	overall	1325	0.380877
Figure 5	a	normPR distribution	MoleculeNet	sider	Blood and lymphatic system disorders	fcnn_fingerprint	2	Ordinary folds	overall	1326	0.386236
Figure 5	a	normPR distribution	MoleculeNet	sider	Blood and lymphatic system disorders	fcnn_character	2	Ordinary folds	overall	1327	0.343059
Figure 5	a	normPR distribution	MoleculeNet	sider	Blood and lymphatic system disorders	molclr	2	Ordinary folds	overall	1328	0.156187
Figure 5	a	normPR distribution	MoleculeNet	sider	Blood and lymphatic system disorders	xgboost_fingerprint	2	Ordinary folds	overall	1329	0.341387
Figure 5	a	normPR distribution	MoleculeNet	sider	Blood and lymphatic system disorders	xgboost_character	2	Ordinary folds	overall	1330	0.470586
Figure 5	a	normPR distribution	MoleculeNet	sider	Blood and lymphatic system disorders	chemberta3	3	Ordinary folds	overall	1331	0.408565
Figure 5	a	normPR distribution	MoleculeNet	sider	Blood and lymphatic system disorders	dmpnn	3	Ordinary folds	overall	1332	0.26504
Figure 5	a	normPR distribution	MoleculeNet	sider	Blood and lymphatic system disorders	fcnn_fingerprint	3	Ordinary folds	overall	1333	0.443427
Figure 5	a	normPR distribution	MoleculeNet	sider	Blood and lymphatic system disorders	fcnn_character	3	Ordinary folds	overall	1334	0.391156
Figure 5	a	normPR distribution	MoleculeNet	sider	Blood and lymphatic system disorders	molclr	3	Ordinary folds	overall	1335	0.324293
Figure 5	a	normPR distribution	MoleculeNet	sider	Blood and lymphatic system disorders	xgboost_fingerprint	3	Ordinary folds	overall	1336	0.412412
Figure 5	a	normPR distribution	MoleculeNet	sider	Blood and lymphatic system disorders	xgboost_character	3	Ordinary folds	overall	1337	0.54514
Figure 5	a	normPR distribution	MoleculeNet	sider	Blood and lymphatic system disorders	chemberta3	4	Ordinary folds	overall	1338	0.419078
Figure 5	a	normPR distribution	MoleculeNet	sider	Blood and lymphatic system disorders	dmpnn	4	Ordinary folds	overall	1339	0.320596
Figure 5	a	normPR distribution	MoleculeNet	sider	Blood and lymphatic system disorders	fcnn_fingerprint	4	Ordinary folds	overall	1340	0.342548
Figure 5	a	normPR distribution	MoleculeNet	sider	Blood and lymphatic system disorders	fcnn_character	4	Ordinary folds	overall	1341	0.277344
Figure 5	a	normPR distribution	MoleculeNet	sider	Blood and lymphatic system disorders	molclr	4	Ordinary folds	overall	1342	0.516452
Figure 5	a	normPR distribution	MoleculeNet	sider	Blood and lymphatic system disorders	xgboost_fingerprint	4	Ordinary folds	overall	1343	0.412402
Figure 5	a	normPR distribution	MoleculeNet	sider	Blood and lymphatic system disorders	xgboost_character	4	Ordinary folds	overall	1344	0.414114
Figure 5	a	normPR distribution	MoleculeNet	sider	Blood and lymphatic system disorders	chemberta3	5	Ordinary folds	overall	1345	0.555128
Figure 5	a	normPR distribution	MoleculeNet	sider	Blood and lymphatic system disorders	dmpnn	5	Ordinary folds	overall	1346	0.394408
Figure 5	a	normPR distribution	MoleculeNet	sider	Blood and lymphatic system disorders	fcnn_fingerprint	5	Ordinary folds	overall	1347	0.516245
Figure 5	a	normPR distribution	MoleculeNet	sider	Blood and lymphatic system disorders	fcnn_character	5	Ordinary folds	overall	1348	0.489157
Figure 5	a	normPR distribution	MoleculeNet	sider	Blood and lymphatic system disorders	molclr	5	Ordinary folds	overall	1349	0.572229
Figure 5	a	normPR distribution	MoleculeNet	sider	Blood and lymphatic system disorders	xgboost_fingerprint	5	Ordinary folds	overall	1350	0.544117
Figure 5	a	normPR distribution	MoleculeNet	sider	Blood and lymphatic system disorders	xgboost_character	5	Ordinary folds	overall	1351	0.600032
Figure 5	a	normPR distribution	MoleculeNet	sider	Blood and lymphatic system disorders	chemberta3	6	Ordinary folds	overall	1352	0.417638
Figure 5	a	normPR distribution	MoleculeNet	sider	Blood and lymphatic system disorders	dmpnn	6	Ordinary folds	overall	1353	0.450644
Figure 5	a	normPR distribution	MoleculeNet	sider	Blood and lymphatic system disorders	fcnn_fingerprint	6	Ordinary folds	overall	1354	0.384827
Figure 5	a	normPR distribution	MoleculeNet	sider	Blood and lymphatic system disorders	fcnn_character	6	Ordinary folds	overall	1355	0.257896
Figure 5	a	normPR distribution	MoleculeNet	sider	Blood and lymphatic system disorders	molclr	6	Ordinary folds	overall	1356	0.43926
Figure 5	a	normPR distribution	MoleculeNet	sider	Blood and lymphatic system disorders	xgboost_fingerprint	6	Ordinary folds	overall	1357	0.506848
Figure 5	a	normPR distribution	MoleculeNet	sider	Blood and lymphatic system disorders	xgboost_character	6	Ordinary folds	overall	1358	0.288569
Figure 5	a	normPR distribution	MoleculeNet	sider	Blood and lymphatic system disorders	chemberta3	7	Ordinary folds	overall	1359	0.594424
Figure 5	a	normPR distribution	MoleculeNet	sider	Blood and lymphatic system disorders	dmpnn	7	Ordinary folds	overall	1360	0.536635
Figure 5	a	normPR distribution	MoleculeNet	sider	Blood and lymphatic system disorders	fcnn_fingerprint	7	Ordinary folds	overall	1361	0.602247
Figure 5	a	normPR distribution	MoleculeNet	sider	Blood and lymphatic system disorders	fcnn_character	7	Ordinary folds	overall	1362	0.542082
Figure 5	a	normPR distribution	MoleculeNet	sider	Blood and lymphatic system disorders	molclr	7	Ordinary folds	overall	1363	0.465893
Figure 5	a	normPR distribution	MoleculeNet	sider	Blood and lymphatic system disorders	xgboost_fingerprint	7	Ordinary folds	overall	1364	0.511619
Figure 5	a	normPR distribution	MoleculeNet	sider	Blood and lymphatic system disorders	xgboost_character	7	Ordinary folds	overall	1365	0.544743
Figure 5	a	normPR distribution	MoleculeNet	sider	Cardiac disorders	chemberta3	2	Ordinary folds	overall	1366	0.211693
Figure 5	a	normPR distribution	MoleculeNet	sider	Cardiac disorders	dmpnn	2	Ordinary folds	overall	1367	0.315807
Figure 5	a	normPR distribution	MoleculeNet	sider	Cardiac disorders	fcnn_fingerprint	2	Ordinary folds	overall	1368	0.228729
Figure 5	a	normPR distribution	MoleculeNet	sider	Cardiac disorders	fcnn_character	2	Ordinary folds	overall	1369	0.383952
Figure 5	a	normPR distribution	MoleculeNet	sider	Cardiac disorders	molclr	2	Ordinary folds	overall	1370	0.261376
Figure 5	a	normPR distribution	MoleculeNet	sider	Cardiac disorders	xgboost_fingerprint	2	Ordinary folds	overall	1371	0.205211
Figure 5	a	normPR distribution	MoleculeNet	sider	Cardiac disorders	xgboost_character	2	Ordinary folds	overall	1372	0.344003
Figure 5	a	normPR distribution	MoleculeNet	sider	Cardiac disorders	chemberta3	3	Ordinary folds	overall	1373	0.0679447
Figure 5	a	normPR distribution	MoleculeNet	sider	Cardiac disorders	dmpnn	3	Ordinary folds	overall	1374	0.347299
Figure 5	a	normPR distribution	MoleculeNet	sider	Cardiac disorders	fcnn_fingerprint	3	Ordinary folds	overall	1375	0.224857
Figure 5	a	normPR distribution	MoleculeNet	sider	Cardiac disorders	fcnn_character	3	Ordinary folds	overall	1376	0.205921
Figure 5	a	normPR distribution	MoleculeNet	sider	Cardiac disorders	molclr	3	Ordinary folds	overall	1377	0.084076
Figure 5	a	normPR distribution	MoleculeNet	sider	Cardiac disorders	xgboost_fingerprint	3	Ordinary folds	overall	1378	0.147527
Figure 5	a	normPR distribution	MoleculeNet	sider	Cardiac disorders	xgboost_character	3	Ordinary folds	overall	1379	0.241151
Figure 5	a	normPR distribution	MoleculeNet	sider	Cardiac disorders	chemberta3	4	Ordinary folds	overall	1380	0.256524
Figure 5	a	normPR distribution	MoleculeNet	sider	Cardiac disorders	dmpnn	4	Ordinary folds	overall	1381	0.307012
Figure 5	a	normPR distribution	MoleculeNet	sider	Cardiac disorders	fcnn_fingerprint	4	Ordinary folds	overall	1382	0.455043
Figure 5	a	normPR distribution	MoleculeNet	sider	Cardiac disorders	fcnn_character	4	Ordinary folds	overall	1383	0.0761384
Figure 5	a	normPR distribution	MoleculeNet	sider	Cardiac disorders	molclr	4	Ordinary folds	overall	1384	-0.00883346
Figure 5	a	normPR distribution	MoleculeNet	sider	Cardiac disorders	xgboost_fingerprint	4	Ordinary folds	overall	1385	0.447212
Figure 5	a	normPR distribution	MoleculeNet	sider	Cardiac disorders	xgboost_character	4	Ordinary folds	overall	1386	-0.0849208
Figure 5	a	normPR distribution	MoleculeNet	sider	Cardiac disorders	chemberta3	5	Ordinary folds	overall	1387	0.217333
Figure 5	a	normPR distribution	MoleculeNet	sider	Cardiac disorders	dmpnn	5	Ordinary folds	overall	1388	0.0850788
Figure 5	a	normPR distribution	MoleculeNet	sider	Cardiac disorders	fcnn_fingerprint	5	Ordinary folds	overall	1389	0.436488
Figure 5	a	normPR distribution	MoleculeNet	sider	Cardiac disorders	fcnn_character	5	Ordinary folds	overall	1390	0.405497
Figure 5	a	normPR distribution	MoleculeNet	sider	Cardiac disorders	molclr	5	Ordinary folds	overall	1391	0.26933
Figure 5	a	normPR distribution	MoleculeNet	sider	Cardiac disorders	xgboost_fingerprint	5	Ordinary folds	overall	1392	0.344172
Figure 5	a	normPR distribution	MoleculeNet	sider	Cardiac disorders	xgboost_character	5	Ordinary folds	overall	1393	0.232204
Figure 5	a	normPR distribution	MoleculeNet	sider	Cardiac disorders	chemberta3	6	Ordinary folds	overall	1394	0.283807
Figure 5	a	normPR distribution	MoleculeNet	sider	Cardiac disorders	dmpnn	6	Ordinary folds	overall	1395	0.133794
Figure 5	a	normPR distribution	MoleculeNet	sider	Cardiac disorders	fcnn_fingerprint	6	Ordinary folds	overall	1396	0.106575
Figure 5	a	normPR distribution	MoleculeNet	sider	Cardiac disorders	fcnn_character	6	Ordinary folds	overall	1397	0.132289
Figure 5	a	normPR distribution	MoleculeNet	sider	Cardiac disorders	molclr	6	Ordinary folds	overall	1398	0.131654
Figure 5	a	normPR distribution	MoleculeNet	sider	Cardiac disorders	xgboost_fingerprint	6	Ordinary folds	overall	1399	0.168011
Figure 5	a	normPR distribution	MoleculeNet	sider	Cardiac disorders	xgboost_character	6	Ordinary folds	overall	1400	0.319457
Figure 5	a	normPR distribution	MoleculeNet	sider	Cardiac disorders	chemberta3	7	Ordinary folds	overall	1401	0.381365
Figure 5	a	normPR distribution	MoleculeNet	sider	Cardiac disorders	dmpnn	7	Ordinary folds	overall	1402	0.519436
Figure 5	a	normPR distribution	MoleculeNet	sider	Cardiac disorders	fcnn_fingerprint	7	Ordinary folds	overall	1403	0.226078
Figure 5	a	normPR distribution	MoleculeNet	sider	Cardiac disorders	fcnn_character	7	Ordinary folds	overall	1404	0.340072
Figure 5	a	normPR distribution	MoleculeNet	sider	Cardiac disorders	molclr	7	Ordinary folds	overall	1405	0.305746
Figure 5	a	normPR distribution	MoleculeNet	sider	Cardiac disorders	xgboost_fingerprint	7	Ordinary folds	overall	1406	0.266569
Figure 5	a	normPR distribution	MoleculeNet	sider	Cardiac disorders	xgboost_character	7	Ordinary folds	overall	1407	0.423367
Figure 5	a	normPR distribution	MoleculeNet	sider	Ear and labyrinth disorders	chemberta3	2	Ordinary folds	overall	1408	0.269453
Figure 5	a	normPR distribution	MoleculeNet	sider	Ear and labyrinth disorders	dmpnn	2	Ordinary folds	overall	1409	0.216233
Figure 5	a	normPR distribution	MoleculeNet	sider	Ear and labyrinth disorders	fcnn_fingerprint	2	Ordinary folds	overall	1410	0.268621
Figure 5	a	normPR distribution	MoleculeNet	sider	Ear and labyrinth disorders	fcnn_character	2	Ordinary folds	overall	1411	-0.00681204
Figure 5	a	normPR distribution	MoleculeNet	sider	Ear and labyrinth disorders	molclr	2	Ordinary folds	overall	1412	0.172745
Figure 5	a	normPR distribution	MoleculeNet	sider	Ear and labyrinth disorders	xgboost_fingerprint	2	Ordinary folds	overall	1413	0.196896
Figure 5	a	normPR distribution	MoleculeNet	sider	Ear and labyrinth disorders	xgboost_character	2	Ordinary folds	overall	1414	0.0647089
Figure 5	a	normPR distribution	MoleculeNet	sider	Ear and labyrinth disorders	chemberta3	3	Ordinary folds	overall	1415	0.15418
Figure 5	a	normPR distribution	MoleculeNet	sider	Ear and labyrinth disorders	dmpnn	3	Ordinary folds	overall	1416	0.29914
Figure 5	a	normPR distribution	MoleculeNet	sider	Ear and labyrinth disorders	fcnn_fingerprint	3	Ordinary folds	overall	1417	0.230225
Figure 5	a	normPR distribution	MoleculeNet	sider	Ear and labyrinth disorders	fcnn_character	3	Ordinary folds	overall	1418	0.0615803
Figure 5	a	normPR distribution	MoleculeNet	sider	Ear and labyrinth disorders	molclr	3	Ordinary folds	overall	1419	0.185387
Figure 5	a	normPR distribution	MoleculeNet	sider	Ear and labyrinth disorders	xgboost_fingerprint	3	Ordinary folds	overall	1420	0.236754
Figure 5	a	normPR distribution	MoleculeNet	sider	Ear and labyrinth disorders	xgboost_character	3	Ordinary folds	overall	1421	0.168114
Figure 5	a	normPR distribution	MoleculeNet	sider	Ear and labyrinth disorders	chemberta3	4	Ordinary folds	overall	1422	0.0920467
Figure 5	a	normPR distribution	MoleculeNet	sider	Ear and labyrinth disorders	dmpnn	4	Ordinary folds	overall	1423	0.253672
Figure 5	a	normPR distribution	MoleculeNet	sider	Ear and labyrinth disorders	fcnn_fingerprint	4	Ordinary folds	overall	1424	0.306187
Figure 5	a	normPR distribution	MoleculeNet	sider	Ear and labyrinth disorders	fcnn_character	4	Ordinary folds	overall	1425	0.060565
Figure 5	a	normPR distribution	MoleculeNet	sider	Ear and labyrinth disorders	molclr	4	Ordinary folds	overall	1426	0.162515
Figure 5	a	normPR distribution	MoleculeNet	sider	Ear and labyrinth disorders	xgboost_fingerprint	4	Ordinary folds	overall	1427	0.238343
Figure 5	a	normPR distribution	MoleculeNet	sider	Ear and labyrinth disorders	xgboost_character	4	Ordinary folds	overall	1428	0.0822351
Figure 5	a	normPR distribution	MoleculeNet	sider	Ear and labyrinth disorders	chemberta3	5	Ordinary folds	overall	1429	-0.00454247
Figure 5	a	normPR distribution	MoleculeNet	sider	Ear and labyrinth disorders	dmpnn	5	Ordinary folds	overall	1430	0.286759
Figure 5	a	normPR distribution	MoleculeNet	sider	Ear and labyrinth disorders	fcnn_fingerprint	5	Ordinary folds	overall	1431	0.134277
Figure 5	a	normPR distribution	MoleculeNet	sider	Ear and labyrinth disorders	fcnn_character	5	Ordinary folds	overall	1432	0.0756189
Figure 5	a	normPR distribution	MoleculeNet	sider	Ear and labyrinth disorders	molclr	5	Ordinary folds	overall	1433	0.0643178
Figure 5	a	normPR distribution	MoleculeNet	sider	Ear and labyrinth disorders	xgboost_fingerprint	5	Ordinary folds	overall	1434	0.108919
Figure 5	a	normPR distribution	MoleculeNet	sider	Ear and labyrinth disorders	xgboost_character	5	Ordinary folds	overall	1435	0.0796834
Figure 5	a	normPR distribution	MoleculeNet	sider	Ear and labyrinth disorders	chemberta3	6	Ordinary folds	overall	1436	0.0543234
Figure 5	a	normPR distribution	MoleculeNet	sider	Ear and labyrinth disorders	dmpnn	6	Ordinary folds	overall	1437	0.19749
Figure 5	a	normPR distribution	MoleculeNet	sider	Ear and labyrinth disorders	fcnn_fingerprint	6	Ordinary folds	overall	1438	0.222579
Figure 5	a	normPR distribution	MoleculeNet	sider	Ear and labyrinth disorders	fcnn_character	6	Ordinary folds	overall	1439	0.0322738
Figure 5	a	normPR distribution	MoleculeNet	sider	Ear and labyrinth disorders	molclr	6	Ordinary folds	overall	1440	-0.0237607
Figure 5	a	normPR distribution	MoleculeNet	sider	Ear and labyrinth disorders	xgboost_fingerprint	6	Ordinary folds	overall	1441	0.278685
Figure 5	a	normPR distribution	MoleculeNet	sider	Ear and labyrinth disorders	xgboost_character	6	Ordinary folds	overall	1442	-0.0143067
Figure 5	a	normPR distribution	MoleculeNet	sider	Ear and labyrinth disorders	chemberta3	7	Ordinary folds	overall	1443	0.208902
Figure 5	a	normPR distribution	MoleculeNet	sider	Ear and labyrinth disorders	dmpnn	7	Ordinary folds	overall	1444	0.189368
Figure 5	a	normPR distribution	MoleculeNet	sider	Ear and labyrinth disorders	fcnn_fingerprint	7	Ordinary folds	overall	1445	0.308888
Figure 5	a	normPR distribution	MoleculeNet	sider	Ear and labyrinth disorders	fcnn_character	7	Ordinary folds	overall	1446	0.186551
Figure 5	a	normPR distribution	MoleculeNet	sider	Ear and labyrinth disorders	molclr	7	Ordinary folds	overall	1447	0.168528
Figure 5	a	normPR distribution	MoleculeNet	sider	Ear and labyrinth disorders	xgboost_fingerprint	7	Ordinary folds	overall	1448	0.246821
Figure 5	a	normPR distribution	MoleculeNet	sider	Ear and labyrinth disorders	xgboost_character	7	Ordinary folds	overall	1449	0.281077
Figure 5	a	normPR distribution	MoleculeNet	sider	Endocrine disorders	chemberta3	2	Ordinary folds	overall	1450	0.208982
Figure 5	a	normPR distribution	MoleculeNet	sider	Endocrine disorders	dmpnn	2	Ordinary folds	overall	1451	0.232226
Figure 5	a	normPR distribution	MoleculeNet	sider	Endocrine disorders	fcnn_fingerprint	2	Ordinary folds	overall	1452	0.165927
Figure 5	a	normPR distribution	MoleculeNet	sider	Endocrine disorders	fcnn_character	2	Ordinary folds	overall	1453	0.0729093
Figure 5	a	normPR distribution	MoleculeNet	sider	Endocrine disorders	molclr	2	Ordinary folds	overall	1454	0.163809
Figure 5	a	normPR distribution	MoleculeNet	sider	Endocrine disorders	xgboost_fingerprint	2	Ordinary folds	overall	1455	0.127168
Figure 5	a	normPR distribution	MoleculeNet	sider	Endocrine disorders	xgboost_character	2	Ordinary folds	overall	1456	0.201646
Figure 5	a	normPR distribution	MoleculeNet	sider	Endocrine disorders	chemberta3	3	Ordinary folds	overall	1457	0.18764
Figure 5	a	normPR distribution	MoleculeNet	sider	Endocrine disorders	dmpnn	3	Ordinary folds	overall	1458	0.224197
Figure 5	a	normPR distribution	MoleculeNet	sider	Endocrine disorders	fcnn_fingerprint	3	Ordinary folds	overall	1459	0.240122
Figure 5	a	normPR distribution	MoleculeNet	sider	Endocrine disorders	fcnn_character	3	Ordinary folds	overall	1460	0.0228582
Figure 5	a	normPR distribution	MoleculeNet	sider	Endocrine disorders	molclr	3	Ordinary folds	overall	1461	0.21109
Figure 5	a	normPR distribution	MoleculeNet	sider	Endocrine disorders	xgboost_fingerprint	3	Ordinary folds	overall	1462	0.172084
Figure 5	a	normPR distribution	MoleculeNet	sider	Endocrine disorders	xgboost_character	3	Ordinary folds	overall	1463	0.120699
Figure 5	a	normPR distribution	MoleculeNet	sider	Endocrine disorders	chemberta3	4	Ordinary folds	overall	1464	0.139796
Figure 5	a	normPR distribution	MoleculeNet	sider	Endocrine disorders	dmpnn	4	Ordinary folds	overall	1465	0.230722
Figure 5	a	normPR distribution	MoleculeNet	sider	Endocrine disorders	fcnn_fingerprint	4	Ordinary folds	overall	1466	0.0951589
Figure 5	a	normPR distribution	MoleculeNet	sider	Endocrine disorders	fcnn_character	4	Ordinary folds	overall	1467	0.0626984
Figure 5	a	normPR distribution	MoleculeNet	sider	Endocrine disorders	molclr	4	Ordinary folds	overall	1468	0.168707
Figure 5	a	normPR distribution	MoleculeNet	sider	Endocrine disorders	xgboost_fingerprint	4	Ordinary folds	overall	1469	0.124296
Figure 5	a	normPR distribution	MoleculeNet	sider	Endocrine disorders	xgboost_character	4	Ordinary folds	overall	1470	0.0851928
Figure 5	a	normPR distribution	MoleculeNet	sider	Endocrine disorders	chemberta3	5	Ordinary folds	overall	1471	0.253205
Figure 5	a	normPR distribution	MoleculeNet	sider	Endocrine disorders	dmpnn	5	Ordinary folds	overall	1472	0.30226
Figure 5	a	normPR distribution	MoleculeNet	sider	Endocrine disorders	fcnn_fingerprint	5	Ordinary folds	overall	1473	0.286889
Figure 5	a	normPR distribution	MoleculeNet	sider	Endocrine disorders	fcnn_character	5	Ordinary folds	overall	1474	0.250016
Figure 5	a	normPR distribution	MoleculeNet	sider	Endocrine disorders	molclr	5	Ordinary folds	overall	1475	0.299783
Figure 5	a	normPR distribution	MoleculeNet	sider	Endocrine disorders	xgboost_fingerprint	5	Ordinary folds	overall	1476	0.4351
Figure 5	a	normPR distribution	MoleculeNet	sider	Endocrine disorders	xgboost_character	5	Ordinary folds	overall	1477	0.283045
Figure 5	a	normPR distribution	MoleculeNet	sider	Endocrine disorders	chemberta3	6	Ordinary folds	overall	1478	0.357729
Figure 5	a	normPR distribution	MoleculeNet	sider	Endocrine disorders	dmpnn	6	Ordinary folds	overall	1479	0.212933
Figure 5	a	normPR distribution	MoleculeNet	sider	Endocrine disorders	fcnn_fingerprint	6	Ordinary folds	overall	1480	0.51133
Figure 5	a	normPR distribution	MoleculeNet	sider	Endocrine disorders	fcnn_character	6	Ordinary folds	overall	1481	0.29309
Figure 5	a	normPR distribution	MoleculeNet	sider	Endocrine disorders	molclr	6	Ordinary folds	overall	1482	0.0714093
Figure 5	a	normPR distribution	MoleculeNet	sider	Endocrine disorders	xgboost_fingerprint	6	Ordinary folds	overall	1483	0.380591
Figure 5	a	normPR distribution	MoleculeNet	sider	Endocrine disorders	xgboost_character	6	Ordinary folds	overall	1484	0.390801
Figure 5	a	normPR distribution	MoleculeNet	sider	Endocrine disorders	chemberta3	7	Ordinary folds	overall	1485	0.384959
Figure 5	a	normPR distribution	MoleculeNet	sider	Endocrine disorders	dmpnn	7	Ordinary folds	overall	1486	0.312593
Figure 5	a	normPR distribution	MoleculeNet	sider	Endocrine disorders	fcnn_fingerprint	7	Ordinary folds	overall	1487	0.219936
Figure 5	a	normPR distribution	MoleculeNet	sider	Endocrine disorders	fcnn_character	7	Ordinary folds	overall	1488	0.305156
Figure 5	a	normPR distribution	MoleculeNet	sider	Endocrine disorders	molclr	7	Ordinary folds	overall	1489	0.128728
Figure 5	a	normPR distribution	MoleculeNet	sider	Endocrine disorders	xgboost_fingerprint	7	Ordinary folds	overall	1490	0.219758
Figure 5	a	normPR distribution	MoleculeNet	sider	Endocrine disorders	xgboost_character	7	Ordinary folds	overall	1491	0.245812
Figure 5	a	normPR distribution	MoleculeNet	sider	Eye disorders	chemberta3	2	Ordinary folds	overall	1492	-0.00916708
Figure 5	a	normPR distribution	MoleculeNet	sider	Eye disorders	dmpnn	2	Ordinary folds	overall	1493	0.189656
Figure 5	a	normPR distribution	MoleculeNet	sider	Eye disorders	fcnn_fingerprint	2	Ordinary folds	overall	1494	0.288504
Figure 5	a	normPR distribution	MoleculeNet	sider	Eye disorders	fcnn_character	2	Ordinary folds	overall	1495	0.200722
Figure 5	a	normPR distribution	MoleculeNet	sider	Eye disorders	molclr	2	Ordinary folds	overall	1496	0.401465
Figure 5	a	normPR distribution	MoleculeNet	sider	Eye disorders	xgboost_fingerprint	2	Ordinary folds	overall	1497	0.125839
Figure 5	a	normPR distribution	MoleculeNet	sider	Eye disorders	xgboost_character	2	Ordinary folds	overall	1498	0.438447
Figure 5	a	normPR distribution	MoleculeNet	sider	Eye disorders	chemberta3	3	Ordinary folds	overall	1499	0.154337
Figure 5	a	normPR distribution	MoleculeNet	sider	Eye disorders	dmpnn	3	Ordinary folds	overall	1500	0.247286
Figure 5	a	normPR distribution	MoleculeNet	sider	Eye disorders	fcnn_fingerprint	3	Ordinary folds	overall	1501	0.105386
Figure 5	a	normPR distribution	MoleculeNet	sider	Eye disorders	fcnn_character	3	Ordinary folds	overall	1502	0.180347
Figure 5	a	normPR distribution	MoleculeNet	sider	Eye disorders	molclr	3	Ordinary folds	overall	1503	0.171321
Figure 5	a	normPR distribution	MoleculeNet	sider	Eye disorders	xgboost_fingerprint	3	Ordinary folds	overall	1504	0.0978515
Figure 5	a	normPR distribution	MoleculeNet	sider	Eye disorders	xgboost_character	3	Ordinary folds	overall	1505	0.128305
Figure 5	a	normPR distribution	MoleculeNet	sider	Eye disorders	chemberta3	4	Ordinary folds	overall	1506	0.287879
Figure 5	a	normPR distribution	MoleculeNet	sider	Eye disorders	dmpnn	4	Ordinary folds	overall	1507	0.263235
Figure 5	a	normPR distribution	MoleculeNet	sider	Eye disorders	fcnn_fingerprint	4	Ordinary folds	overall	1508	0.244029
Figure 5	a	normPR distribution	MoleculeNet	sider	Eye disorders	fcnn_character	4	Ordinary folds	overall	1509	0.18949
Figure 5	a	normPR distribution	MoleculeNet	sider	Eye disorders	molclr	4	Ordinary folds	overall	1510	0.134406
Figure 5	a	normPR distribution	MoleculeNet	sider	Eye disorders	xgboost_fingerprint	4	Ordinary folds	overall	1511	0.216383
Figure 5	a	normPR distribution	MoleculeNet	sider	Eye disorders	xgboost_character	4	Ordinary folds	overall	1512	0.207028
Figure 5	a	normPR distribution	MoleculeNet	sider	Eye disorders	chemberta3	5	Ordinary folds	overall	1513	0.188483
Figure 5	a	normPR distribution	MoleculeNet	sider	Eye disorders	dmpnn	5	Ordinary folds	overall	1514	0.169372
Figure 5	a	normPR distribution	MoleculeNet	sider	Eye disorders	fcnn_fingerprint	5	Ordinary folds	overall	1515	0.167836
Figure 5	a	normPR distribution	MoleculeNet	sider	Eye disorders	fcnn_character	5	Ordinary folds	overall	1516	0.22603
Figure 5	a	normPR distribution	MoleculeNet	sider	Eye disorders	molclr	5	Ordinary folds	overall	1517	0.124318
Figure 5	a	normPR distribution	MoleculeNet	sider	Eye disorders	xgboost_fingerprint	5	Ordinary folds	overall	1518	0.205479
Figure 5	a	normPR distribution	MoleculeNet	sider	Eye disorders	xgboost_character	5	Ordinary folds	overall	1519	0.270588
Figure 5	a	normPR distribution	MoleculeNet	sider	Eye disorders	chemberta3	6	Ordinary folds	overall	1520	0.373914
Figure 5	a	normPR distribution	MoleculeNet	sider	Eye disorders	dmpnn	6	Ordinary folds	overall	1521	0.215986
Figure 5	a	normPR distribution	MoleculeNet	sider	Eye disorders	fcnn_fingerprint	6	Ordinary folds	overall	1522	0.297432
Figure 5	a	normPR distribution	MoleculeNet	sider	Eye disorders	fcnn_character	6	Ordinary folds	overall	1523	0.141878
Figure 5	a	normPR distribution	MoleculeNet	sider	Eye disorders	molclr	6	Ordinary folds	overall	1524	0.28783
Figure 5	a	normPR distribution	MoleculeNet	sider	Eye disorders	xgboost_fingerprint	6	Ordinary folds	overall	1525	0.30428
Figure 5	a	normPR distribution	MoleculeNet	sider	Eye disorders	xgboost_character	6	Ordinary folds	overall	1526	0.284011
Figure 5	a	normPR distribution	MoleculeNet	sider	Eye disorders	chemberta3	7	Ordinary folds	overall	1527	0.33608
Figure 5	a	normPR distribution	MoleculeNet	sider	Eye disorders	dmpnn	7	Ordinary folds	overall	1528	0.418329
Figure 5	a	normPR distribution	MoleculeNet	sider	Eye disorders	fcnn_fingerprint	7	Ordinary folds	overall	1529	0.447885
Figure 5	a	normPR distribution	MoleculeNet	sider	Eye disorders	fcnn_character	7	Ordinary folds	overall	1530	0.234552
Figure 5	a	normPR distribution	MoleculeNet	sider	Eye disorders	molclr	7	Ordinary folds	overall	1531	0.188435
Figure 5	a	normPR distribution	MoleculeNet	sider	Eye disorders	xgboost_fingerprint	7	Ordinary folds	overall	1532	0.405948
Figure 5	a	normPR distribution	MoleculeNet	sider	Eye disorders	xgboost_character	7	Ordinary folds	overall	1533	0.36864
Figure 5	a	normPR distribution	MoleculeNet	sider	Gastrointestinal disorders	chemberta3	2	Ordinary folds	overall	1534	0.145215
Figure 5	a	normPR distribution	MoleculeNet	sider	Gastrointestinal disorders	dmpnn	2	Ordinary folds	overall	1535	0.131256
Figure 5	a	normPR distribution	MoleculeNet	sider	Gastrointestinal disorders	fcnn_fingerprint	2	Ordinary folds	overall	1536	0.338814
Figure 5	a	normPR distribution	MoleculeNet	sider	Gastrointestinal disorders	fcnn_character	2	Ordinary folds	overall	1537	0.305384
Figure 5	a	normPR distribution	MoleculeNet	sider	Gastrointestinal disorders	molclr	2	Ordinary folds	overall	1538	0.395858
Figure 5	a	normPR distribution	MoleculeNet	sider	Gastrointestinal disorders	xgboost_fingerprint	2	Ordinary folds	overall	1539	0.468841
Figure 5	a	normPR distribution	MoleculeNet	sider	Gastrointestinal disorders	xgboost_character	2	Ordinary folds	overall	1540	0.596151
Figure 5	a	normPR distribution	MoleculeNet	sider	Gastrointestinal disorders	chemberta3	3	Ordinary folds	overall	1541	0.184981
Figure 5	a	normPR distribution	MoleculeNet	sider	Gastrointestinal disorders	dmpnn	3	Ordinary folds	overall	1542	0.579689
Figure 5	a	normPR distribution	MoleculeNet	sider	Gastrointestinal disorders	fcnn_fingerprint	3	Ordinary folds	overall	1543	0.490917
Figure 5	a	normPR distribution	MoleculeNet	sider	Gastrointestinal disorders	fcnn_character	3	Ordinary folds	overall	1544	0.5807
Figure 5	a	normPR distribution	MoleculeNet	sider	Gastrointestinal disorders	molclr	3	Ordinary folds	overall	1545	0.342779
Figure 5	a	normPR distribution	MoleculeNet	sider	Gastrointestinal disorders	xgboost_fingerprint	3	Ordinary folds	overall	1546	0.630594
Figure 5	a	normPR distribution	MoleculeNet	sider	Gastrointestinal disorders	xgboost_character	3	Ordinary folds	overall	1547	0.613009
Figure 5	a	normPR distribution	MoleculeNet	sider	Gastrointestinal disorders	chemberta3	5	Ordinary folds	overall	1548	0.581893
Figure 5	a	normPR distribution	MoleculeNet	sider	Gastrointestinal disorders	dmpnn	5	Ordinary folds	overall	1549	0.537024
Figure 5	a	normPR distribution	MoleculeNet	sider	Gastrointestinal disorders	fcnn_fingerprint	5	Ordinary folds	overall	1550	0.603899
Figure 5	a	normPR distribution	MoleculeNet	sider	Gastrointestinal disorders	fcnn_character	5	Ordinary folds	overall	1551	0.608737
Figure 5	a	normPR distribution	MoleculeNet	sider	Gastrointestinal disorders	molclr	5	Ordinary folds	overall	1552	0.60147
Figure 5	a	normPR distribution	MoleculeNet	sider	Gastrointestinal disorders	xgboost_fingerprint	5	Ordinary folds	overall	1553	0.767534
Figure 5	a	normPR distribution	MoleculeNet	sider	Gastrointestinal disorders	xgboost_character	5	Ordinary folds	overall	1554	0.694446
Figure 5	a	normPR distribution	MoleculeNet	sider	Gastrointestinal disorders	chemberta3	6	Ordinary folds	overall	1555	0.0290338
Figure 5	a	normPR distribution	MoleculeNet	sider	Gastrointestinal disorders	dmpnn	6	Ordinary folds	overall	1556	0.249861
Figure 5	a	normPR distribution	MoleculeNet	sider	Gastrointestinal disorders	fcnn_fingerprint	6	Ordinary folds	overall	1557	0.292005
Figure 5	a	normPR distribution	MoleculeNet	sider	Gastrointestinal disorders	fcnn_character	6	Ordinary folds	overall	1558	0.3546
Figure 5	a	normPR distribution	MoleculeNet	sider	Gastrointestinal disorders	molclr	6	Ordinary folds	overall	1559	0.0925401
Figure 5	a	normPR distribution	MoleculeNet	sider	Gastrointestinal disorders	xgboost_fingerprint	6	Ordinary folds	overall	1560	0.469589
Figure 5	a	normPR distribution	MoleculeNet	sider	Gastrointestinal disorders	xgboost_character	6	Ordinary folds	overall	1561	0.140802
Figure 5	a	normPR distribution	MoleculeNet	sider	Gastrointestinal disorders	chemberta3	7	Ordinary folds	overall	1562	0.62438
Figure 5	a	normPR distribution	MoleculeNet	sider	Gastrointestinal disorders	dmpnn	7	Ordinary folds	overall	1563	-0.058764
Figure 5	a	normPR distribution	MoleculeNet	sider	Gastrointestinal disorders	fcnn_fingerprint	7	Ordinary folds	overall	1564	0.269749
Figure 5	a	normPR distribution	MoleculeNet	sider	Gastrointestinal disorders	fcnn_character	7	Ordinary folds	overall	1565	0.283511
Figure 5	a	normPR distribution	MoleculeNet	sider	Gastrointestinal disorders	molclr	7	Ordinary folds	overall	1566	0.718549
Figure 5	a	normPR distribution	MoleculeNet	sider	Gastrointestinal disorders	xgboost_fingerprint	7	Ordinary folds	overall	1567	0.429021
Figure 5	a	normPR distribution	MoleculeNet	sider	Gastrointestinal disorders	xgboost_character	7	Ordinary folds	overall	1568	0.644229
Figure 5	a	normPR distribution	MoleculeNet	sider	Hepatobiliary disorders	chemberta3	2	Ordinary folds	overall	1569	-0.00937869
Figure 5	a	normPR distribution	MoleculeNet	sider	Hepatobiliary disorders	dmpnn	2	Ordinary folds	overall	1570	0.271351
Figure 5	a	normPR distribution	MoleculeNet	sider	Hepatobiliary disorders	fcnn_fingerprint	2	Ordinary folds	overall	1571	0.31356
Figure 5	a	normPR distribution	MoleculeNet	sider	Hepatobiliary disorders	fcnn_character	2	Ordinary folds	overall	1572	0.21315
Figure 5	a	normPR distribution	MoleculeNet	sider	Hepatobiliary disorders	molclr	2	Ordinary folds	overall	1573	0.233674
Figure 5	a	normPR distribution	MoleculeNet	sider	Hepatobiliary disorders	xgboost_fingerprint	2	Ordinary folds	overall	1574	0.260693
Figure 5	a	normPR distribution	MoleculeNet	sider	Hepatobiliary disorders	xgboost_character	2	Ordinary folds	overall	1575	0.161058
Figure 5	a	normPR distribution	MoleculeNet	sider	Hepatobiliary disorders	chemberta3	3	Ordinary folds	overall	1576	0.371305
Figure 5	a	normPR distribution	MoleculeNet	sider	Hepatobiliary disorders	dmpnn	3	Ordinary folds	overall	1577	0.221836
Figure 5	a	normPR distribution	MoleculeNet	sider	Hepatobiliary disorders	fcnn_fingerprint	3	Ordinary folds	overall	1578	0.303969
Figure 5	a	normPR distribution	MoleculeNet	sider	Hepatobiliary disorders	fcnn_character	3	Ordinary folds	overall	1579	0.276928
Figure 5	a	normPR distribution	MoleculeNet	sider	Hepatobiliary disorders	molclr	3	Ordinary folds	overall	1580	0.315284
Figure 5	a	normPR distribution	MoleculeNet	sider	Hepatobiliary disorders	xgboost_fingerprint	3	Ordinary folds	overall	1581	0.432764
Figure 5	a	normPR distribution	MoleculeNet	sider	Hepatobiliary disorders	xgboost_character	3	Ordinary folds	overall	1582	0.372464
Figure 5	a	normPR distribution	MoleculeNet	sider	Hepatobiliary disorders	chemberta3	4	Ordinary folds	overall	1583	0.283444
Figure 5	a	normPR distribution	MoleculeNet	sider	Hepatobiliary disorders	dmpnn	4	Ordinary folds	overall	1584	0.36055
Figure 5	a	normPR distribution	MoleculeNet	sider	Hepatobiliary disorders	fcnn_fingerprint	4	Ordinary folds	overall	1585	0.299388
Figure 5	a	normPR distribution	MoleculeNet	sider	Hepatobiliary disorders	fcnn_character	4	Ordinary folds	overall	1586	0.307877
Figure 5	a	normPR distribution	MoleculeNet	sider	Hepatobiliary disorders	molclr	4	Ordinary folds	overall	1587	0.347622
Figure 5	a	normPR distribution	MoleculeNet	sider	Hepatobiliary disorders	xgboost_fingerprint	4	Ordinary folds	overall	1588	0.362181
Figure 5	a	normPR distribution	MoleculeNet	sider	Hepatobiliary disorders	xgboost_character	4	Ordinary folds	overall	1589	0.393152
Figure 5	a	normPR distribution	MoleculeNet	sider	Hepatobiliary disorders	chemberta3	5	Ordinary folds	overall	1590	0.423623
Figure 5	a	normPR distribution	MoleculeNet	sider	Hepatobiliary disorders	dmpnn	5	Ordinary folds	overall	1591	0.383611
Figure 5	a	normPR distribution	MoleculeNet	sider	Hepatobiliary disorders	fcnn_fingerprint	5	Ordinary folds	overall	1592	0.476607
Figure 5	a	normPR distribution	MoleculeNet	sider	Hepatobiliary disorders	fcnn_character	5	Ordinary folds	overall	1593	0.334485
Figure 5	a	normPR distribution	MoleculeNet	sider	Hepatobiliary disorders	molclr	5	Ordinary folds	overall	1594	0.489706
Figure 5	a	normPR distribution	MoleculeNet	sider	Hepatobiliary disorders	xgboost_fingerprint	5	Ordinary folds	overall	1595	0.34883
Figure 5	a	normPR distribution	MoleculeNet	sider	Hepatobiliary disorders	xgboost_character	5	Ordinary folds	overall	1596	0.395903
Figure 5	a	normPR distribution	MoleculeNet	sider	Hepatobiliary disorders	chemberta3	6	Ordinary folds	overall	1597	0.145161
Figure 5	a	normPR distribution	MoleculeNet	sider	Hepatobiliary disorders	dmpnn	6	Ordinary folds	overall	1598	0.232544
Figure 5	a	normPR distribution	MoleculeNet	sider	Hepatobiliary disorders	fcnn_fingerprint	6	Ordinary folds	overall	1599	0.181463
Figure 5	a	normPR distribution	MoleculeNet	sider	Hepatobiliary disorders	fcnn_character	6	Ordinary folds	overall	1600	0.223218
Figure 5	a	normPR distribution	MoleculeNet	sider	Hepatobiliary disorders	molclr	6	Ordinary folds	overall	1601	0.0784547
Figure 5	a	normPR distribution	MoleculeNet	sider	Hepatobiliary disorders	xgboost_fingerprint	6	Ordinary folds	overall	1602	0.16434
Figure 5	a	normPR distribution	MoleculeNet	sider	Hepatobiliary disorders	xgboost_character	6	Ordinary folds	overall	1603	0.224388
Figure 5	a	normPR distribution	MoleculeNet	sider	Hepatobiliary disorders	chemberta3	7	Ordinary folds	overall	1604	0.37545
Figure 5	a	normPR distribution	MoleculeNet	sider	Hepatobiliary disorders	dmpnn	7	Ordinary folds	overall	1605	0.381652
Figure 5	a	normPR distribution	MoleculeNet	sider	Hepatobiliary disorders	fcnn_fingerprint	7	Ordinary folds	overall	1606	0.412838
Figure 5	a	normPR distribution	MoleculeNet	sider	Hepatobiliary disorders	fcnn_character	7	Ordinary folds	overall	1607	0.334365
Figure 5	a	normPR distribution	MoleculeNet	sider	Hepatobiliary disorders	molclr	7	Ordinary folds	overall	1608	0.303949
Figure 5	a	normPR distribution	MoleculeNet	sider	Hepatobiliary disorders	xgboost_fingerprint	7	Ordinary folds	overall	1609	0.356723
Figure 5	a	normPR distribution	MoleculeNet	sider	Hepatobiliary disorders	xgboost_character	7	Ordinary folds	overall	1610	0.415493
Figure 5	a	normPR distribution	MoleculeNet	sider	Immune system disorders	chemberta3	2	Ordinary folds	overall	1611	0.230401
Figure 5	a	normPR distribution	MoleculeNet	sider	Immune system disorders	dmpnn	2	Ordinary folds	overall	1612	0.135823
Figure 5	a	normPR distribution	MoleculeNet	sider	Immune system disorders	fcnn_fingerprint	2	Ordinary folds	overall	1613	0.168036
Figure 5	a	normPR distribution	MoleculeNet	sider	Immune system disorders	fcnn_character	2	Ordinary folds	overall	1614	0.296099
Figure 5	a	normPR distribution	MoleculeNet	sider	Immune system disorders	molclr	2	Ordinary folds	overall	1615	0.2063
Figure 5	a	normPR distribution	MoleculeNet	sider	Immune system disorders	xgboost_fingerprint	2	Ordinary folds	overall	1616	0.290464
Figure 5	a	normPR distribution	MoleculeNet	sider	Immune system disorders	xgboost_character	2	Ordinary folds	overall	1617	0.205362
Figure 5	a	normPR distribution	MoleculeNet	sider	Immune system disorders	chemberta3	3	Ordinary folds	overall	1618	0.0788953
Figure 5	a	normPR distribution	MoleculeNet	sider	Immune system disorders	dmpnn	3	Ordinary folds	overall	1619	0.452067
Figure 5	a	normPR distribution	MoleculeNet	sider	Immune system disorders	fcnn_fingerprint	3	Ordinary folds	overall	1620	0.0991008
Figure 5	a	normPR distribution	MoleculeNet	sider	Immune system disorders	fcnn_character	3	Ordinary folds	overall	1621	0.41569
Figure 5	a	normPR distribution	MoleculeNet	sider	Immune system disorders	molclr	3	Ordinary folds	overall	1622	0.310588
Figure 5	a	normPR distribution	MoleculeNet	sider	Immune system disorders	xgboost_fingerprint	3	Ordinary folds	overall	1623	0.170374
Figure 5	a	normPR distribution	MoleculeNet	sider	Immune system disorders	xgboost_character	3	Ordinary folds	overall	1624	0.495925
Figure 5	a	normPR distribution	MoleculeNet	sider	Immune system disorders	chemberta3	4	Ordinary folds	overall	1625	0.271005
Figure 5	a	normPR distribution	MoleculeNet	sider	Immune system disorders	dmpnn	4	Ordinary folds	overall	1626	0.165014
Figure 5	a	normPR distribution	MoleculeNet	sider	Immune system disorders	fcnn_fingerprint	4	Ordinary folds	overall	1627	0.31745
Figure 5	a	normPR distribution	MoleculeNet	sider	Immune system disorders	fcnn_character	4	Ordinary folds	overall	1628	0.221219
Figure 5	a	normPR distribution	MoleculeNet	sider	Immune system disorders	molclr	4	Ordinary folds	overall	1629	0.0593838
Figure 5	a	normPR distribution	MoleculeNet	sider	Immune system disorders	xgboost_fingerprint	4	Ordinary folds	overall	1630	0.313594
Figure 5	a	normPR distribution	MoleculeNet	sider	Immune system disorders	xgboost_character	4	Ordinary folds	overall	1631	0.187789
Figure 5	a	normPR distribution	MoleculeNet	sider	Immune system disorders	chemberta3	5	Ordinary folds	overall	1632	0.239122
Figure 5	a	normPR distribution	MoleculeNet	sider	Immune system disorders	dmpnn	5	Ordinary folds	overall	1633	0.0434474
Figure 5	a	normPR distribution	MoleculeNet	sider	Immune system disorders	fcnn_fingerprint	5	Ordinary folds	overall	1634	0.367045
Figure 5	a	normPR distribution	MoleculeNet	sider	Immune system disorders	fcnn_character	5	Ordinary folds	overall	1635	0.283021
Figure 5	a	normPR distribution	MoleculeNet	sider	Immune system disorders	molclr	5	Ordinary folds	overall	1636	0.325022
Figure 5	a	normPR distribution	MoleculeNet	sider	Immune system disorders	xgboost_fingerprint	5	Ordinary folds	overall	1637	0.435623
Figure 5	a	normPR distribution	MoleculeNet	sider	Immune system disorders	xgboost_character	5	Ordinary folds	overall	1638	0.207073
Figure 5	a	normPR distribution	MoleculeNet	sider	Immune system disorders	chemberta3	6	Ordinary folds	overall	1639	0.506169
Figure 5	a	normPR distribution	MoleculeNet	sider	Immune system disorders	dmpnn	6	Ordinary folds	overall	1640	0.0367554
Figure 5	a	normPR distribution	MoleculeNet	sider	Immune system disorders	fcnn_fingerprint	6	Ordinary folds	overall	1641	0.236752
Figure 5	a	normPR distribution	MoleculeNet	sider	Immune system disorders	fcnn_character	6	Ordinary folds	overall	1642	0.401798
Figure 5	a	normPR distribution	MoleculeNet	sider	Immune system disorders	molclr	6	Ordinary folds	overall	1643	0.395705
Figure 5	a	normPR distribution	MoleculeNet	sider	Immune system disorders	xgboost_fingerprint	6	Ordinary folds	overall	1644	0.132597
Figure 5	a	normPR distribution	MoleculeNet	sider	Immune system disorders	xgboost_character	6	Ordinary folds	overall	1645	0.287037
Figure 5	a	normPR distribution	MoleculeNet	sider	Immune system disorders	chemberta3	7	Ordinary folds	overall	1646	0.148421
Figure 5	a	normPR distribution	MoleculeNet	sider	Immune system disorders	dmpnn	7	Ordinary folds	overall	1647	0.0330985
Figure 5	a	normPR distribution	MoleculeNet	sider	Immune system disorders	fcnn_fingerprint	7	Ordinary folds	overall	1648	0.12511
Figure 5	a	normPR distribution	MoleculeNet	sider	Immune system disorders	fcnn_character	7	Ordinary folds	overall	1649	0.345744
Figure 5	a	normPR distribution	MoleculeNet	sider	Immune system disorders	molclr	7	Ordinary folds	overall	1650	0.15838
Figure 5	a	normPR distribution	MoleculeNet	sider	Immune system disorders	xgboost_fingerprint	7	Ordinary folds	overall	1651	0.313143
Figure 5	a	normPR distribution	MoleculeNet	sider	Immune system disorders	xgboost_character	7	Ordinary folds	overall	1652	0.164854
Figure 5	a	normPR distribution	MoleculeNet	sider	Injury, poisoning and procedural complications	chemberta3	2	Ordinary folds	overall	1653	0.205763
Figure 5	a	normPR distribution	MoleculeNet	sider	Injury, poisoning and procedural complications	dmpnn	2	Ordinary folds	overall	1654	0.156633
Figure 5	a	normPR distribution	MoleculeNet	sider	Injury, poisoning and procedural complications	fcnn_fingerprint	2	Ordinary folds	overall	1655	0.184173
Figure 5	a	normPR distribution	MoleculeNet	sider	Injury, poisoning and procedural complications	fcnn_character	2	Ordinary folds	overall	1656	0.231577
Figure 5	a	normPR distribution	MoleculeNet	sider	Injury, poisoning and procedural complications	molclr	2	Ordinary folds	overall	1657	-0.0570788
Figure 5	a	normPR distribution	MoleculeNet	sider	Injury, poisoning and procedural complications	xgboost_fingerprint	2	Ordinary folds	overall	1658	0.200307
Figure 5	a	normPR distribution	MoleculeNet	sider	Injury, poisoning and procedural complications	xgboost_character	2	Ordinary folds	overall	1659	0.14444
Figure 5	a	normPR distribution	MoleculeNet	sider	Injury, poisoning and procedural complications	chemberta3	3	Ordinary folds	overall	1660	0.0968504
Figure 5	a	normPR distribution	MoleculeNet	sider	Injury, poisoning and procedural complications	dmpnn	3	Ordinary folds	overall	1661	0.0718782
Figure 5	a	normPR distribution	MoleculeNet	sider	Injury, poisoning and procedural complications	fcnn_fingerprint	3	Ordinary folds	overall	1662	0.0722715
Figure 5	a	normPR distribution	MoleculeNet	sider	Injury, poisoning and procedural complications	fcnn_character	3	Ordinary folds	overall	1663	0.143487
Figure 5	a	normPR distribution	MoleculeNet	sider	Injury, poisoning and procedural complications	molclr	3	Ordinary folds	overall	1664	0.259362
Figure 5	a	normPR distribution	MoleculeNet	sider	Injury, poisoning and procedural complications	xgboost_fingerprint	3	Ordinary folds	overall	1665	0.158402
Figure 5	a	normPR distribution	MoleculeNet	sider	Injury, poisoning and procedural complications	xgboost_character	3	Ordinary folds	overall	1666	0.21127
Figure 5	a	normPR distribution	MoleculeNet	sider	Injury, poisoning and procedural complications	chemberta3	4	Ordinary folds	overall	1667	0.17056
Figure 5	a	normPR distribution	MoleculeNet	sider	Injury, poisoning and procedural complications	dmpnn	4	Ordinary folds	overall	1668	0.107577
Figure 5	a	normPR distribution	MoleculeNet	sider	Injury, poisoning and procedural complications	fcnn_fingerprint	4	Ordinary folds	overall	1669	0.192283
Figure 5	a	normPR distribution	MoleculeNet	sider	Injury, poisoning and procedural complications	fcnn_character	4	Ordinary folds	overall	1670	0.137754
Figure 5	a	normPR distribution	MoleculeNet	sider	Injury, poisoning and procedural complications	molclr	4	Ordinary folds	overall	1671	0.109842
Figure 5	a	normPR distribution	MoleculeNet	sider	Injury, poisoning and procedural complications	xgboost_fingerprint	4	Ordinary folds	overall	1672	0.293871
Figure 5	a	normPR distribution	MoleculeNet	sider	Injury, poisoning and procedural complications	xgboost_character	4	Ordinary folds	overall	1673	0.148123
Figure 5	a	normPR distribution	MoleculeNet	sider	Injury, poisoning and procedural complications	chemberta3	5	Ordinary folds	overall	1674	0.205683
Figure 5	a	normPR distribution	MoleculeNet	sider	Injury, poisoning and procedural complications	dmpnn	5	Ordinary folds	overall	1675	0.210161
Figure 5	a	normPR distribution	MoleculeNet	sider	Injury, poisoning and procedural complications	fcnn_fingerprint	5	Ordinary folds	overall	1676	0.380586
Figure 5	a	normPR distribution	MoleculeNet	sider	Injury, poisoning and procedural complications	fcnn_character	5	Ordinary folds	overall	1677	0.0472613
Figure 5	a	normPR distribution	MoleculeNet	sider	Injury, poisoning and procedural complications	molclr	5	Ordinary folds	overall	1678	0.209898
Figure 5	a	normPR distribution	MoleculeNet	sider	Injury, poisoning and procedural complications	xgboost_fingerprint	5	Ordinary folds	overall	1679	0.361104
Figure 5	a	normPR distribution	MoleculeNet	sider	Injury, poisoning and procedural complications	xgboost_character	5	Ordinary folds	overall	1680	0.202371
Figure 5	a	normPR distribution	MoleculeNet	sider	Injury, poisoning and procedural complications	chemberta3	6	Ordinary folds	overall	1681	0.170004
Figure 5	a	normPR distribution	MoleculeNet	sider	Injury, poisoning and procedural complications	dmpnn	6	Ordinary folds	overall	1682	0.172316
Figure 5	a	normPR distribution	MoleculeNet	sider	Injury, poisoning and procedural complications	fcnn_fingerprint	6	Ordinary folds	overall	1683	0.219922
Figure 5	a	normPR distribution	MoleculeNet	sider	Injury, poisoning and procedural complications	fcnn_character	6	Ordinary folds	overall	1684	-0.0420976
Figure 5	a	normPR distribution	MoleculeNet	sider	Injury, poisoning and procedural complications	molclr	6	Ordinary folds	overall	1685	-0.153559
Figure 5	a	normPR distribution	MoleculeNet	sider	Injury, poisoning and procedural complications	xgboost_fingerprint	6	Ordinary folds	overall	1686	0.40694
Figure 5	a	normPR distribution	MoleculeNet	sider	Injury, poisoning and procedural complications	xgboost_character	6	Ordinary folds	overall	1687	0.0670009
Figure 5	a	normPR distribution	MoleculeNet	sider	Injury, poisoning and procedural complications	chemberta3	7	Ordinary folds	overall	1688	0.156595
Figure 5	a	normPR distribution	MoleculeNet	sider	Injury, poisoning and procedural complications	dmpnn	7	Ordinary folds	overall	1689	0.135331
Figure 5	a	normPR distribution	MoleculeNet	sider	Injury, poisoning and procedural complications	fcnn_fingerprint	7	Ordinary folds	overall	1690	0.301598
Figure 5	a	normPR distribution	MoleculeNet	sider	Injury, poisoning and procedural complications	fcnn_character	7	Ordinary folds	overall	1691	0.28544
Figure 5	a	normPR distribution	MoleculeNet	sider	Injury, poisoning and procedural complications	molclr	7	Ordinary folds	overall	1692	-0.0592334
Figure 5	a	normPR distribution	MoleculeNet	sider	Injury, poisoning and procedural complications	xgboost_fingerprint	7	Ordinary folds	overall	1693	0.252801
Figure 5	a	normPR distribution	MoleculeNet	sider	Injury, poisoning and procedural complications	xgboost_character	7	Ordinary folds	overall	1694	0.321342
Figure 5	a	normPR distribution	MoleculeNet	sider	Metabolism and nutrition disorders	chemberta3	2	Ordinary folds	overall	1695	0.0733904
Figure 5	a	normPR distribution	MoleculeNet	sider	Metabolism and nutrition disorders	dmpnn	2	Ordinary folds	overall	1696	-0.0986904
Figure 5	a	normPR distribution	MoleculeNet	sider	Metabolism and nutrition disorders	fcnn_fingerprint	2	Ordinary folds	overall	1697	0.0622228
Figure 5	a	normPR distribution	MoleculeNet	sider	Metabolism and nutrition disorders	fcnn_character	2	Ordinary folds	overall	1698	-0.0799375
Figure 5	a	normPR distribution	MoleculeNet	sider	Metabolism and nutrition disorders	molclr	2	Ordinary folds	overall	1699	-0.171282
Figure 5	a	normPR distribution	MoleculeNet	sider	Metabolism and nutrition disorders	xgboost_fingerprint	2	Ordinary folds	overall	1700	0.0578326
Figure 5	a	normPR distribution	MoleculeNet	sider	Metabolism and nutrition disorders	xgboost_character	2	Ordinary folds	overall	1701	-0.150724
Figure 5	a	normPR distribution	MoleculeNet	sider	Metabolism and nutrition disorders	chemberta3	3	Ordinary folds	overall	1702	0.139401
Figure 5	a	normPR distribution	MoleculeNet	sider	Metabolism and nutrition disorders	dmpnn	3	Ordinary folds	overall	1703	0.230528
Figure 5	a	normPR distribution	MoleculeNet	sider	Metabolism and nutrition disorders	fcnn_fingerprint	3	Ordinary folds	overall	1704	0.170527
Figure 5	a	normPR distribution	MoleculeNet	sider	Metabolism and nutrition disorders	fcnn_character	3	Ordinary folds	overall	1705	0.0177803
Figure 5	a	normPR distribution	MoleculeNet	sider	Metabolism and nutrition disorders	molclr	3	Ordinary folds	overall	1706	0.131202
Figure 5	a	normPR distribution	MoleculeNet	sider	Metabolism and nutrition disorders	xgboost_fingerprint	3	Ordinary folds	overall	1707	0.210766
Figure 5	a	normPR distribution	MoleculeNet	sider	Metabolism and nutrition disorders	xgboost_character	3	Ordinary folds	overall	1708	0.0889036
Figure 5	a	normPR distribution	MoleculeNet	sider	Metabolism and nutrition disorders	chemberta3	4	Ordinary folds	overall	1709	0.185326
Figure 5	a	normPR distribution	MoleculeNet	sider	Metabolism and nutrition disorders	dmpnn	4	Ordinary folds	overall	1710	0.356633
Figure 5	a	normPR distribution	MoleculeNet	sider	Metabolism and nutrition disorders	fcnn_fingerprint	4	Ordinary folds	overall	1711	0.235718
Figure 5	a	normPR distribution	MoleculeNet	sider	Metabolism and nutrition disorders	fcnn_character	4	Ordinary folds	overall	1712	0.0171825
Figure 5	a	normPR distribution	MoleculeNet	sider	Metabolism and nutrition disorders	molclr	4	Ordinary folds	overall	1713	0.274362
Figure 5	a	normPR distribution	MoleculeNet	sider	Metabolism and nutrition disorders	xgboost_fingerprint	4	Ordinary folds	overall	1714	0.270964
Figure 5	a	normPR distribution	MoleculeNet	sider	Metabolism and nutrition disorders	xgboost_character	4	Ordinary folds	overall	1715	0.213345
Figure 5	a	normPR distribution	MoleculeNet	sider	Metabolism and nutrition disorders	chemberta3	5	Ordinary folds	overall	1716	-0.123267
Figure 5	a	normPR distribution	MoleculeNet	sider	Metabolism and nutrition disorders	dmpnn	5	Ordinary folds	overall	1717	0.287706
Figure 5	a	normPR distribution	MoleculeNet	sider	Metabolism and nutrition disorders	fcnn_fingerprint	5	Ordinary folds	overall	1718	0.231575
Figure 5	a	normPR distribution	MoleculeNet	sider	Metabolism and nutrition disorders	fcnn_character	5	Ordinary folds	overall	1719	0.0544315
Figure 5	a	normPR distribution	MoleculeNet	sider	Metabolism and nutrition disorders	molclr	5	Ordinary folds	overall	1720	0.131835
Figure 5	a	normPR distribution	MoleculeNet	sider	Metabolism and nutrition disorders	xgboost_fingerprint	5	Ordinary folds	overall	1721	0.179484
Figure 5	a	normPR distribution	MoleculeNet	sider	Metabolism and nutrition disorders	xgboost_character	5	Ordinary folds	overall	1722	0.107773
Figure 5	a	normPR distribution	MoleculeNet	sider	Metabolism and nutrition disorders	chemberta3	6	Ordinary folds	overall	1723	-0.0949695
Figure 5	a	normPR distribution	MoleculeNet	sider	Metabolism and nutrition disorders	dmpnn	6	Ordinary folds	overall	1724	0.0313894
Figure 5	a	normPR distribution	MoleculeNet	sider	Metabolism and nutrition disorders	fcnn_fingerprint	6	Ordinary folds	overall	1725	0.0750287
Figure 5	a	normPR distribution	MoleculeNet	sider	Metabolism and nutrition disorders	fcnn_character	6	Ordinary folds	overall	1726	0.0609809
Figure 5	a	normPR distribution	MoleculeNet	sider	Metabolism and nutrition disorders	molclr	6	Ordinary folds	overall	1727	0.0540568
Figure 5	a	normPR distribution	MoleculeNet	sider	Metabolism and nutrition disorders	xgboost_fingerprint	6	Ordinary folds	overall	1728	0.0767899
Figure 5	a	normPR distribution	MoleculeNet	sider	Metabolism and nutrition disorders	xgboost_character	6	Ordinary folds	overall	1729	0.0106114
Figure 5	a	normPR distribution	MoleculeNet	sider	Metabolism and nutrition disorders	chemberta3	7	Ordinary folds	overall	1730	0.335281
Figure 5	a	normPR distribution	MoleculeNet	sider	Metabolism and nutrition disorders	dmpnn	7	Ordinary folds	overall	1731	0.597858
Figure 5	a	normPR distribution	MoleculeNet	sider	Metabolism and nutrition disorders	fcnn_fingerprint	7	Ordinary folds	overall	1732	0.249205
Figure 5	a	normPR distribution	MoleculeNet	sider	Metabolism and nutrition disorders	fcnn_character	7	Ordinary folds	overall	1733	0.072512
Figure 5	a	normPR distribution	MoleculeNet	sider	Metabolism and nutrition disorders	molclr	7	Ordinary folds	overall	1734	0.106461
Figure 5	a	normPR distribution	MoleculeNet	sider	Metabolism and nutrition disorders	xgboost_fingerprint	7	Ordinary folds	overall	1735	0.194858
Figure 5	a	normPR distribution	MoleculeNet	sider	Metabolism and nutrition disorders	xgboost_character	7	Ordinary folds	overall	1736	0.309159
Figure 5	a	normPR distribution	MoleculeNet	sider	Musculoskeletal and connective tissue disorders	chemberta3	2	Ordinary folds	overall	1737	-0.206345
Figure 5	a	normPR distribution	MoleculeNet	sider	Musculoskeletal and connective tissue disorders	dmpnn	2	Ordinary folds	overall	1738	0.000969354
Figure 5	a	normPR distribution	MoleculeNet	sider	Musculoskeletal and connective tissue disorders	fcnn_fingerprint	2	Ordinary folds	overall	1739	0.208859
Figure 5	a	normPR distribution	MoleculeNet	sider	Musculoskeletal and connective tissue disorders	fcnn_character	2	Ordinary folds	overall	1740	0.145437
Figure 5	a	normPR distribution	MoleculeNet	sider	Musculoskeletal and connective tissue disorders	molclr	2	Ordinary folds	overall	1741	0.140673
Figure 5	a	normPR distribution	MoleculeNet	sider	Musculoskeletal and connective tissue disorders	xgboost_fingerprint	2	Ordinary folds	overall	1742	0.306351
Figure 5	a	normPR distribution	MoleculeNet	sider	Musculoskeletal and connective tissue disorders	xgboost_character	2	Ordinary folds	overall	1743	0.201588
Figure 5	a	normPR distribution	MoleculeNet	sider	Musculoskeletal and connective tissue disorders	chemberta3	3	Ordinary folds	overall	1744	0.269814
Figure 5	a	normPR distribution	MoleculeNet	sider	Musculoskeletal and connective tissue disorders	dmpnn	3	Ordinary folds	overall	1745	0.365019
Figure 5	a	normPR distribution	MoleculeNet	sider	Musculoskeletal and connective tissue disorders	fcnn_fingerprint	3	Ordinary folds	overall	1746	0.218852
Figure 5	a	normPR distribution	MoleculeNet	sider	Musculoskeletal and connective tissue disorders	fcnn_character	3	Ordinary folds	overall	1747	0.371314
Figure 5	a	normPR distribution	MoleculeNet	sider	Musculoskeletal and connective tissue disorders	molclr	3	Ordinary folds	overall	1748	0.240402
Figure 5	a	normPR distribution	MoleculeNet	sider	Musculoskeletal and connective tissue disorders	xgboost_fingerprint	3	Ordinary folds	overall	1749	0.354492
Figure 5	a	normPR distribution	MoleculeNet	sider	Musculoskeletal and connective tissue disorders	xgboost_character	3	Ordinary folds	overall	1750	0.436745
Figure 5	a	normPR distribution	MoleculeNet	sider	Musculoskeletal and connective tissue disorders	chemberta3	4	Ordinary folds	overall	1751	0.0882211
Figure 5	a	normPR distribution	MoleculeNet	sider	Musculoskeletal and connective tissue disorders	dmpnn	4	Ordinary folds	overall	1752	0.234601
Figure 5	a	normPR distribution	MoleculeNet	sider	Musculoskeletal and connective tissue disorders	fcnn_fingerprint	4	Ordinary folds	overall	1753	0.364572
Figure 5	a	normPR distribution	MoleculeNet	sider	Musculoskeletal and connective tissue disorders	fcnn_character	4	Ordinary folds	overall	1754	0.0651244
Figure 5	a	normPR distribution	MoleculeNet	sider	Musculoskeletal and connective tissue disorders	molclr	4	Ordinary folds	overall	1755	0.194777
Figure 5	a	normPR distribution	MoleculeNet	sider	Musculoskeletal and connective tissue disorders	xgboost_fingerprint	4	Ordinary folds	overall	1756	0.324607
Figure 5	a	normPR distribution	MoleculeNet	sider	Musculoskeletal and connective tissue disorders	xgboost_character	4	Ordinary folds	overall	1757	0.192893
Figure 5	a	normPR distribution	MoleculeNet	sider	Musculoskeletal and connective tissue disorders	chemberta3	5	Ordinary folds	overall	1758	0.0855529
Figure 5	a	normPR distribution	MoleculeNet	sider	Musculoskeletal and connective tissue disorders	dmpnn	5	Ordinary folds	overall	1759	0.459709
Figure 5	a	normPR distribution	MoleculeNet	sider	Musculoskeletal and connective tissue disorders	fcnn_fingerprint	5	Ordinary folds	overall	1760	0.425467
Figure 5	a	normPR distribution	MoleculeNet	sider	Musculoskeletal and connective tissue disorders	fcnn_character	5	Ordinary folds	overall	1761	0.356126
Figure 5	a	normPR distribution	MoleculeNet	sider	Musculoskeletal and connective tissue disorders	molclr	5	Ordinary folds	overall	1762	0.46915
Figure 5	a	normPR distribution	MoleculeNet	sider	Musculoskeletal and connective tissue disorders	xgboost_fingerprint	5	Ordinary folds	overall	1763	0.395975
Figure 5	a	normPR distribution	MoleculeNet	sider	Musculoskeletal and connective tissue disorders	xgboost_character	5	Ordinary folds	overall	1764	0.37226
Figure 5	a	normPR distribution	MoleculeNet	sider	Musculoskeletal and connective tissue disorders	chemberta3	6	Ordinary folds	overall	1765	0.105263
Figure 5	a	normPR distribution	MoleculeNet	sider	Musculoskeletal and connective tissue disorders	dmpnn	6	Ordinary folds	overall	1766	0.106624
Figure 5	a	normPR distribution	MoleculeNet	sider	Musculoskeletal and connective tissue disorders	fcnn_fingerprint	6	Ordinary folds	overall	1767	0.0136801
Figure 5	a	normPR distribution	MoleculeNet	sider	Musculoskeletal and connective tissue disorders	fcnn_character	6	Ordinary folds	overall	1768	0.0457649
Figure 5	a	normPR distribution	MoleculeNet	sider	Musculoskeletal and connective tissue disorders	molclr	6	Ordinary folds	overall	1769	0.071173
Figure 5	a	normPR distribution	MoleculeNet	sider	Musculoskeletal and connective tissue disorders	xgboost_fingerprint	6	Ordinary folds	overall	1770	0.115784
Figure 5	a	normPR distribution	MoleculeNet	sider	Musculoskeletal and connective tissue disorders	xgboost_character	6	Ordinary folds	overall	1771	0.120755
Figure 5	a	normPR distribution	MoleculeNet	sider	Musculoskeletal and connective tissue disorders	chemberta3	7	Ordinary folds	overall	1772	0.387305
Figure 5	a	normPR distribution	MoleculeNet	sider	Musculoskeletal and connective tissue disorders	dmpnn	7	Ordinary folds	overall	1773	0.43031
Figure 5	a	normPR distribution	MoleculeNet	sider	Musculoskeletal and connective tissue disorders	fcnn_fingerprint	7	Ordinary folds	overall	1774	0.338936
Figure 5	a	normPR distribution	MoleculeNet	sider	Musculoskeletal and connective tissue disorders	fcnn_character	7	Ordinary folds	overall	1775	0.485783
Figure 5	a	normPR distribution	MoleculeNet	sider	Musculoskeletal and connective tissue disorders	molclr	7	Ordinary folds	overall	1776	0.319903
Figure 5	a	normPR distribution	MoleculeNet	sider	Musculoskeletal and connective tissue disorders	xgboost_fingerprint	7	Ordinary folds	overall	1777	0.27298
Figure 5	a	normPR distribution	MoleculeNet	sider	Musculoskeletal and connective tissue disorders	xgboost_character	7	Ordinary folds	overall	1778	0.346969
Figure 5	a	normPR distribution	MoleculeNet	sider	Nervous system disorders	chemberta3	2	Ordinary folds	overall	1779	0.336646
Figure 5	a	normPR distribution	MoleculeNet	sider	Nervous system disorders	dmpnn	2	Ordinary folds	overall	1780	0.318735
Figure 5	a	normPR distribution	MoleculeNet	sider	Nervous system disorders	fcnn_fingerprint	2	Ordinary folds	overall	1781	0.597625
Figure 5	a	normPR distribution	MoleculeNet	sider	Nervous system disorders	fcnn_character	2	Ordinary folds	overall	1782	0.660594
Figure 5	a	normPR distribution	MoleculeNet	sider	Nervous system disorders	molclr	2	Ordinary folds	overall	1783	0.299639
Figure 5	a	normPR distribution	MoleculeNet	sider	Nervous system disorders	xgboost_fingerprint	2	Ordinary folds	overall	1784	0.616256
Figure 5	a	normPR distribution	MoleculeNet	sider	Nervous system disorders	xgboost_character	2	Ordinary folds	overall	1785	0.66258
Figure 5	a	normPR distribution	MoleculeNet	sider	Nervous system disorders	chemberta3	3	Ordinary folds	overall	1786	0.297527
Figure 5	a	normPR distribution	MoleculeNet	sider	Nervous system disorders	dmpnn	3	Ordinary folds	overall	1787	0.380497
Figure 5	a	normPR distribution	MoleculeNet	sider	Nervous system disorders	fcnn_fingerprint	3	Ordinary folds	overall	1788	0.452751
Figure 5	a	normPR distribution	MoleculeNet	sider	Nervous system disorders	fcnn_character	3	Ordinary folds	overall	1789	0.112826
Figure 5	a	normPR distribution	MoleculeNet	sider	Nervous system disorders	molclr	3	Ordinary folds	overall	1790	0.344655
Figure 5	a	normPR distribution	MoleculeNet	sider	Nervous system disorders	xgboost_fingerprint	3	Ordinary folds	overall	1791	0.390543
Figure 5	a	normPR distribution	MoleculeNet	sider	Nervous system disorders	xgboost_character	3	Ordinary folds	overall	1792	0.0757341
Figure 5	a	normPR distribution	MoleculeNet	sider	Nervous system disorders	chemberta3	5	Ordinary folds	overall	1793	0.491103
Figure 5	a	normPR distribution	MoleculeNet	sider	Nervous system disorders	dmpnn	5	Ordinary folds	overall	1794	0.598747
Figure 5	a	normPR distribution	MoleculeNet	sider	Nervous system disorders	fcnn_fingerprint	5	Ordinary folds	overall	1795	0.399596
Figure 5	a	normPR distribution	MoleculeNet	sider	Nervous system disorders	fcnn_character	5	Ordinary folds	overall	1796	0.57388
Figure 5	a	normPR distribution	MoleculeNet	sider	Nervous system disorders	molclr	5	Ordinary folds	overall	1797	0.0976061
Figure 5	a	normPR distribution	MoleculeNet	sider	Nervous system disorders	xgboost_fingerprint	5	Ordinary folds	overall	1798	0.678148
Figure 5	a	normPR distribution	MoleculeNet	sider	Nervous system disorders	xgboost_character	5	Ordinary folds	overall	1799	0.453956
Figure 5	a	normPR distribution	MoleculeNet	sider	Renal and urinary disorders	chemberta3	2	Ordinary folds	overall	1800	0.2962
Figure 5	a	normPR distribution	MoleculeNet	sider	Renal and urinary disorders	dmpnn	2	Ordinary folds	overall	1801	0.109017
Figure 5	a	normPR distribution	MoleculeNet	sider	Renal and urinary disorders	fcnn_fingerprint	2	Ordinary folds	overall	1802	0.347337
Figure 5	a	normPR distribution	MoleculeNet	sider	Renal and urinary disorders	fcnn_character	2	Ordinary folds	overall	1803	0.151777
Figure 5	a	normPR distribution	MoleculeNet	sider	Renal and urinary disorders	molclr	2	Ordinary folds	overall	1804	0.191725
Figure 5	a	normPR distribution	MoleculeNet	sider	Renal and urinary disorders	xgboost_fingerprint	2	Ordinary folds	overall	1805	0.364302
Figure 5	a	normPR distribution	MoleculeNet	sider	Renal and urinary disorders	xgboost_character	2	Ordinary folds	overall	1806	0.0111019
Figure 5	a	normPR distribution	MoleculeNet	sider	Renal and urinary disorders	chemberta3	3	Ordinary folds	overall	1807	0.389688
Figure 5	a	normPR distribution	MoleculeNet	sider	Renal and urinary disorders	dmpnn	3	Ordinary folds	overall	1808	0.399416
Figure 5	a	normPR distribution	MoleculeNet	sider	Renal and urinary disorders	fcnn_fingerprint	3	Ordinary folds	overall	1809	0.221875
Figure 5	a	normPR distribution	MoleculeNet	sider	Renal and urinary disorders	fcnn_character	3	Ordinary folds	overall	1810	0.30134
Figure 5	a	normPR distribution	MoleculeNet	sider	Renal and urinary disorders	molclr	3	Ordinary folds	overall	1811	0.288819
Figure 5	a	normPR distribution	MoleculeNet	sider	Renal and urinary disorders	xgboost_fingerprint	3	Ordinary folds	overall	1812	0.193407
Figure 5	a	normPR distribution	MoleculeNet	sider	Renal and urinary disorders	xgboost_character	3	Ordinary folds	overall	1813	0.353779
Figure 5	a	normPR distribution	MoleculeNet	sider	Renal and urinary disorders	chemberta3	4	Ordinary folds	overall	1814	0.283475
Figure 5	a	normPR distribution	MoleculeNet	sider	Renal and urinary disorders	dmpnn	4	Ordinary folds	overall	1815	0.437332
Figure 5	a	normPR distribution	MoleculeNet	sider	Renal and urinary disorders	fcnn_fingerprint	4	Ordinary folds	overall	1816	0.446742
Figure 5	a	normPR distribution	MoleculeNet	sider	Renal and urinary disorders	fcnn_character	4	Ordinary folds	overall	1817	0.263461
Figure 5	a	normPR distribution	MoleculeNet	sider	Renal and urinary disorders	molclr	4	Ordinary folds	overall	1818	0.270954
Figure 5	a	normPR distribution	MoleculeNet	sider	Renal and urinary disorders	xgboost_fingerprint	4	Ordinary folds	overall	1819	0.360997
Figure 5	a	normPR distribution	MoleculeNet	sider	Renal and urinary disorders	xgboost_character	4	Ordinary folds	overall	1820	0.124857
Figure 5	a	normPR distribution	MoleculeNet	sider	Renal and urinary disorders	chemberta3	5	Ordinary folds	overall	1821	0.313927
Figure 5	a	normPR distribution	MoleculeNet	sider	Renal and urinary disorders	dmpnn	5	Ordinary folds	overall	1822	0.40043
Figure 5	a	normPR distribution	MoleculeNet	sider	Renal and urinary disorders	fcnn_fingerprint	5	Ordinary folds	overall	1823	0.448163
Figure 5	a	normPR distribution	MoleculeNet	sider	Renal and urinary disorders	fcnn_character	5	Ordinary folds	overall	1824	0.200054
Figure 5	a	normPR distribution	MoleculeNet	sider	Renal and urinary disorders	molclr	5	Ordinary folds	overall	1825	0.226156
Figure 5	a	normPR distribution	MoleculeNet	sider	Renal and urinary disorders	xgboost_fingerprint	5	Ordinary folds	overall	1826	0.410947
Figure 5	a	normPR distribution	MoleculeNet	sider	Renal and urinary disorders	xgboost_character	5	Ordinary folds	overall	1827	0.395284
Figure 5	a	normPR distribution	MoleculeNet	sider	Renal and urinary disorders	chemberta3	6	Ordinary folds	overall	1828	0.147726
Figure 5	a	normPR distribution	MoleculeNet	sider	Renal and urinary disorders	dmpnn	6	Ordinary folds	overall	1829	0.160817
Figure 5	a	normPR distribution	MoleculeNet	sider	Renal and urinary disorders	fcnn_fingerprint	6	Ordinary folds	overall	1830	0.121076
Figure 5	a	normPR distribution	MoleculeNet	sider	Renal and urinary disorders	fcnn_character	6	Ordinary folds	overall	1831	0.266926
Figure 5	a	normPR distribution	MoleculeNet	sider	Renal and urinary disorders	molclr	6	Ordinary folds	overall	1832	0.0500203
Figure 5	a	normPR distribution	MoleculeNet	sider	Renal and urinary disorders	xgboost_fingerprint	6	Ordinary folds	overall	1833	0.268599
Figure 5	a	normPR distribution	MoleculeNet	sider	Renal and urinary disorders	xgboost_character	6	Ordinary folds	overall	1834	0.0791952
Figure 5	a	normPR distribution	MoleculeNet	sider	Renal and urinary disorders	chemberta3	7	Ordinary folds	overall	1835	0.219675
[truncated: 5,969 more rows]

## Sheet: Figure 6
Figure	Panel	Plot_element	Data_level	Benchmark	Benchmark_label	Dataset	Target	Task_label	Model	Model_label	Condition	Scope	Metric	Value	Threshold	Threshold_2x_flag	Threshold_3x_flag	N	N_tasks	N_models	Models_worse_n	Models_ge2x_n	All_models_worse	Ordinary_median_relMAE	No_scaffold_relMAE	Inflation_ratio_relMAE	MAE_ratio	Target_scale_ratio_mean_abs	Is_relMAE_2x	Is_relMAE_3x	Ordinary_tail_pct	No_scaffold_tail_pct	Amplification	Pct_no_scaffold_worse	Pct_ge2	Pct_ge3	Source_row_id
[truncated: 8,301 more rows]

[truncated: 2 more sheets: Figure 7, Figure 8]
